# Supplementary material for: Catalytic enantioselective synthesis of fluoromethylated stereocenters by asymmetric hydrogenation
Source: Royal Society of Chemistry journal article supplement (doi:10.1039/d2sc02685f), 2022-01-01
Supplement: d2sc02685f1.pdf [file d2sc02685f1.pdf]

## Catalytic Enantioselective Synthesis of Fluoromethylated Stereocenters by Hydrogenation

Jianping Yang†<sup>a</sup>, Sudipta Ponra†<sup>a</sup>, Xingzhen Li<sup>b</sup>, Bram Peters<sup>a</sup>, Luca Massaro<sup>a</sup>, Taigang Zhou\*<sup>b</sup> and Pher G Andersson\*<sup>a, c</sup>

<sup>a</sup> Department of Organic Chemistry, Stockholm University, Svante Arrhenius väg 16C, SE-10691 Stockholm, Sweden. E-mail: pher.andersson@su.se

<sup>b</sup> College of Chemistry and Chemical Engineering, Southwest Petroleum University, Chengdu, Sichuan 610500, China. E-mail: tgzhou@swpu.edu.cn

<sup>c</sup> School of Chemistry and Physics, University of KwaZulu-Natal, Private Bag X54001, Durban, 4000, South Africa.

† Authors contributed equally to this work

### Table of contents:

|                                                                           |     |
|---------------------------------------------------------------------------|-----|
| Table of contents: .....                                                  | 1   |
| 1. General methods.....                                                   | 1   |
| 2. Additional condition screenings .....                                  | 2   |
| 3. General procedure for synthesis of fluoromethylated alkenes .....      | 3   |
| 4. General procedure for synthesis of monofluoroalkenes .....             | 9   |
| 5. General procedure for asymmetric hydrogenation .....                   | 11  |
| 6. General procedure for further transformation .....                     | 21  |
| 7. Separation method data and specific rotation of chiral compounds ..... | 25  |
| 8. Absolute configuration determination.....                              | 30  |
| 9. NMR Spectra.....                                                       | 31  |
| 10. Chromatograms .....                                                   | 139 |
| 11. References .....                                                      | 162 |

### 1. General methods

All reactions were conducted under inert atmosphere using magnetic stirring. CH<sub>2</sub>Cl<sub>2</sub>, used in the hydrogenation, was freshly distilled from CaH<sub>2</sub> under nitrogen. THF was freshly distilled from sodium-benzophenone under nitrogen. All reagents were used as supplied commercially without further purification. Chromatographic separations were performed on Kiesel gel 60 H silica gel (particle size: 0.063-0.100 mm). Thin layer chromatography (TLC) was performed on aluminium plates coated with Kiesel gel 60 (0.20 mm, UV254) and visualized under ultraviolet light ( $\nu = 254$  nm). <sup>1</sup>H NMR spectra were recorded on a Bruker 400 or 500 at 400/500 MHz in CDCl<sub>3</sub> and referenced internally to the residual CHCl<sub>3</sub> peak (7.26 ppm). <sup>13</sup>C NMR spectra were recorded at 100/125 MHz in CDCl<sub>3</sub> and referenced to the central peak of CDCl<sub>3</sub> (77.16 ppm). Chemical shifts are reported in ppm ( $\delta$  scale). Enantiomeric excesses were determined either using chiral HPLC, SFC or GCMS. Racemic compounds were used for comparison. HRMS data were obtained using a Bruker MicroTOF-Q II instrument operation at ambient temperature. Optical rotations were recorded on an Autopol IV polarimeter from Rudolph Research Analytical, equipped with a sodium lamp (589 nm) and a 10 cm cell.

## 2. Additional condition screenings

Table S1 Condition screenings for CHF<sub>2</sub> substrates

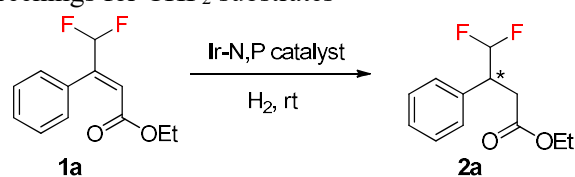

| Entry | Catalyst (mol%) | H <sub>2</sub> (bar) | Solvent                         | Time (h) | Conversion (%) | ee (%) |
|-------|-----------------|----------------------|---------------------------------|----------|----------------|--------|
| 1.    | <b>A</b> (1.0)  | 10                   | CH <sub>2</sub> Cl <sub>2</sub> | 4        | 95             | 21     |
| 2.    | <b>B</b> (1.0)  | 10                   | CH <sub>2</sub> Cl <sub>2</sub> | 4        | 91             | 91     |
| 3.    | <b>C</b> (1.0)  | 10                   | CH <sub>2</sub> Cl <sub>2</sub> | 4        | 72             | 92     |
| 4.    | <b>D</b> (1.0)  | 10                   | CH <sub>2</sub> Cl <sub>2</sub> | 4        | 99             | 92     |
| 5.    | <b>D</b> (0.5)  | 10                   | CH <sub>2</sub> Cl <sub>2</sub> | 4        | 99             | 92     |
| 6.    | <b>D</b> (0.2)  | 10                   | CH <sub>2</sub> Cl <sub>2</sub> | 4        | 68             | 89     |
| 7.    | <b>D</b> (0.5)  | 5                    | CH <sub>2</sub> Cl <sub>2</sub> | 4        | 99             | 92     |
| 8.    | <b>D</b> (0.5)  | 2                    | CH <sub>2</sub> Cl <sub>2</sub> | 4        | 60             | 92     |
| 9.    | <b>D</b> (0.5)  | 5                    | Toluene                         | 4        | 99             | 93     |
| 10.   | <b>D</b> (0.5)  | 5                    | PhCF <sub>3</sub>               | 4        | 99             | 94     |
| 11.   | <b>D</b> (0.5)  | 5                    | PhCF <sub>3</sub>               | 1        | 89             | 94     |
| 12.   | <b>E</b> (0.5)  | 5                    | PhCF <sub>3</sub>               | 4        | 99             | 94     |
| 13.   | <b>F</b> (0.5)  | 5                    | PhCF <sub>3</sub>               | 4        | 99             | 95     |
| 14.   | <b>G</b> (0.5)  | 5                    | PhCF <sub>3</sub>               | 4        | 99             | 96     |
| 15.   | <b>H</b> (0.5)  | 5                    | PhCF <sub>3</sub>               | 4        | 17             | 90     |

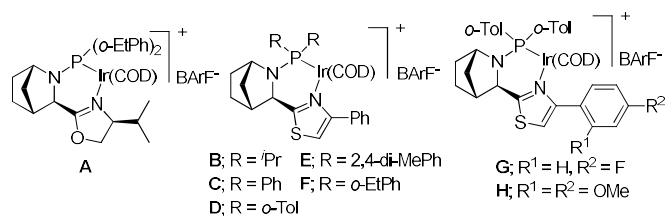

Reaction conditions: 0.05 mmol of **1a**, 0.5 mL solvent. The conversion was determined by <sup>1</sup>H-NMR. Enantiomeric excess was determined by GC/MS using chiral stationary phases.

**Table S2** Condition screenings for vinyl fluorides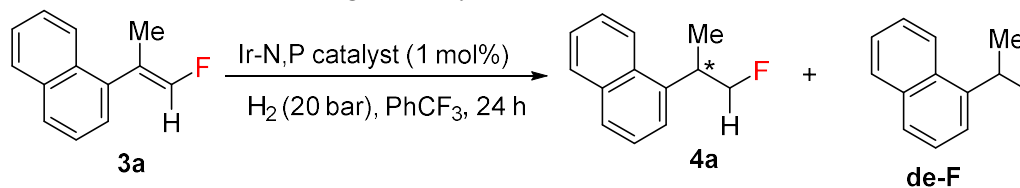

| Entry | Catalyst (mol%) | H <sub>2</sub> (bar) | Solvent                                 | Conversion (%) | de-F (%) | ee (%) |
|-------|-----------------|----------------------|-----------------------------------------|----------------|----------|--------|
| 1.    | <b>B</b> (1.0)  | 20                   | CH <sub>2</sub> Cl <sub>2</sub> (0.1 M) | 66             | 11       | 94     |
| 2.    | <b>C</b> (1.0)  | 20                   | CH <sub>2</sub> Cl <sub>2</sub> (0.1 M) | 24             | 26       | 62     |
| 3.    | <b>D</b> (1.0)  | 20                   | CH <sub>2</sub> Cl <sub>2</sub> (0.1 M) | 96             | 21       | 77     |
| 4.    | <b>B</b> (1.0)  | 20                   | Toluene (0.1 M)                         | 22             | 9        | 87     |
| 5.    | <b>B</b> (1.0)  | 20                   | PhCF <sub>3</sub> (0.1 M)               | 99             | 5        | 93     |
| 6.    | <b>B</b> (1.0)  | 20                   | PhCF <sub>3</sub> (0.05 M)              | 99             | 5        | 94     |
| 7.    | <b>B</b> (1.0)  | 20                   | PhCF <sub>3</sub> (0.025 M)             | 68             | 5        | 94     |

Reaction conditions: 0.05 mmol of **3a**, 0.5 – 2 mL of solvent, 24 h. The conversion was determined by <sup>1</sup>H-NMR. Enantiomeric excess was determined by GC/MS using chiral stationary phases.

### 3. General procedure for synthesis of fluoromethylated alkenes

#### 3.1 General procedure for the synthesis of difluoroketones

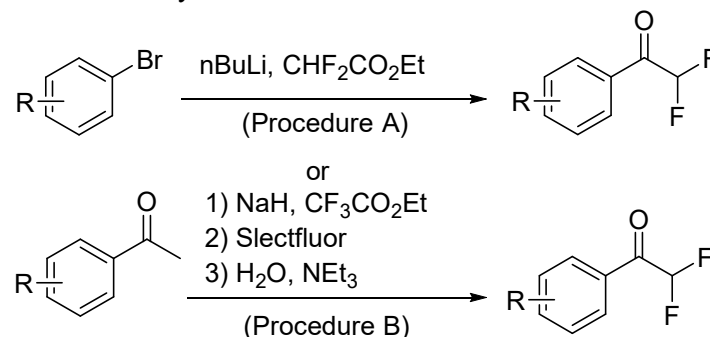

The corresponding difluoroketones were prepared following procedure A or B, which was carried out according to the literature.<sup>1</sup>

#### 3.2 General procedure for the synthesis of di/tri-fluoromethylated olefins

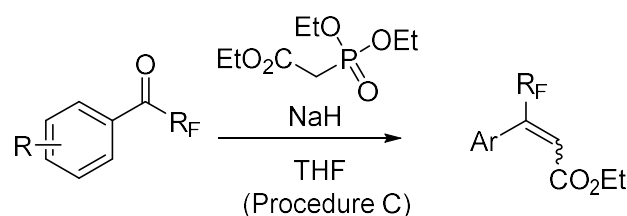

Di/tri-fluoromethylated olefins were prepared following procedure C, which was carried out according to the literature.<sup>2</sup>

### New compounds:

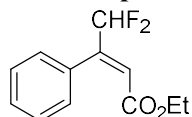

#### Ethyl (*E*)-4,4-difluoro-3-phenylbut-2-enoate (1a)

Colorless oil. <sup>1</sup>H NMR (400 MHz, Chloroform-*d*) δ 7.69 (t, *J* = 54.03 Hz, 1H), 7.59 – 7.50 (m, 2H), 7.47 – 7.35 (m, 3H), 6.29 (s, 1H), 4.27 (q, *J* = 7.14 Hz, 2H), 1.34 (t, *J* = 7.14 Hz, 3H). <sup>13</sup>C NMR (101 MHz, Chloroform-*d*) δ 164.7, 149.2 (t, *J* = 23.28 Hz), 134.1, 129.8, 128.6, 128.2, 124.9 (t, *J* = 7.88 Hz), 110.7 (t, *J* = 236.76 Hz), 61.4, 14.3. <sup>19</sup>F NMR (377 MHz, Chloroform-*d*) δ -116.1. HRMS-ESI: Found [M+Na]<sup>+</sup> = 249.0680; C<sub>12</sub>H<sub>12</sub>F<sub>2</sub>O<sub>2</sub>Na requires 249.0698.

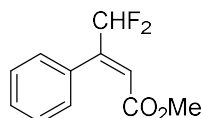

#### Methyl (*E*)-4,4-difluoro-3-phenylbut-2-enoate (1b)

Colorless oil. <sup>1</sup>H NMR (400 MHz, Chloroform-*d*) δ 7.71 (t, *J* = 54.71 Hz, 1H), 7.58 – 7.49 (m, 2H), 7.46 – 7.36 (m, 3H), 6.31 (s, 1H), 3.82 (s, 3H). <sup>13</sup>C NMR (101 MHz, Chloroform-*d*) δ 165.1, 149.5 (t, *J* = 23.37 Hz), 134.0, 129.9, 128.6, 128.2, 124.3 (t, *J* = 7.89 Hz), 110.7 (t, *J* = 236.79 Hz), 52.2. <sup>19</sup>F NMR (377 MHz, Chloroform-*d*) δ -116.1. HRMS-ESI: Found [M+Na]<sup>+</sup> = 235.0544; C<sub>11</sub>H<sub>10</sub>F<sub>2</sub>O<sub>2</sub>Na requires 235.0541.

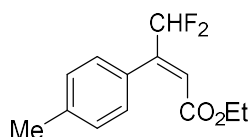

#### Ethyl (*E*)-4,4-difluoro-3-(*p*-tolyl)but-2-enoate (1c)

Colorless oil. <sup>1</sup>H NMR (400 MHz, Chloroform-*d*) δ 7.69 (t, *J* = 54.72 Hz, 1H), 7.45 (d, *J* = 8.12 Hz, 2H), 7.21 (d, *J* = 7.98 Hz, 2H), 6.28 (s, 1H), 4.26 (q, *J* = 7.14 Hz, 2H), 2.38 (s, 3H), 1.34 (t, *J* = 7.14 Hz, 3H). <sup>13</sup>C NMR (101 MHz, Chloroform-*d*) δ 164.9, 149.2 (t, *J* = 23.12 Hz), 140.1, 131.1, 129.4, 128.1, 124.0 (t, *J* = 7.88 Hz), 110.8 (t, *J* = 236.69 Hz), 61.3, 21.4, 14.3. <sup>19</sup>F NMR (377 MHz, Chloroform-*d*) δ -116.1. HRMS-ESI: Found [M+Na]<sup>+</sup> = 263.0862; C<sub>13</sub>H<sub>14</sub>F<sub>2</sub>O<sub>2</sub>Na requires 263.0854.

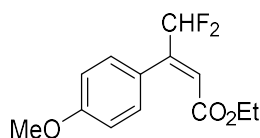

#### Ethyl (*E*)-4,4-difluoro-3-(4-methoxyphenyl)but-2-enoate (1d)

Colorless oil. <sup>1</sup>H NMR (400 MHz, Chloroform-*d*) δ 7.72 (t, *J* = 54.72 Hz, 1H), 7.56 – 7.48 (m, 2H), 6.96 – 6.88 (m, 2H), 6.26 (s, 1H), 4.26 (q, *J* = 7.13 Hz, 2H), 3.84 (s, 3H), 1.33 (t, *J* = 7.12 Hz, 3H). <sup>13</sup>C NMR (101 MHz, Chloroform-*d*) δ 165.0, 161.1, 148.7 (t, *J* = 23.18 Hz), 129.7, 126.2, 123.0 (t, *J* = 7.82 Hz), 114.1, 110.9 (t, *J* = 236.71 Hz), 61.2, 55.5, 14.3. <sup>19</sup>F NMR (377 MHz, Chloroform-*d*) δ -116.2. HRMS-ESI: Found [M+Na]<sup>+</sup> = 279.0812; C<sub>13</sub>H<sub>14</sub>F<sub>2</sub>O<sub>3</sub>Na requires 279.0803.

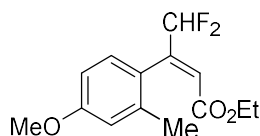

#### Ethyl (*E*)-4,4-difluoro-3-(4-methoxy-2-methylphenyl)but-2-enoate (1e)

Colorless oil. <sup>1</sup>H NMR (400 MHz, Chloroform-*d*) δ 7.71 (t, *J* = 54.78 Hz, 1H), 7.43 – 7.36 (m, 1H), 7.38 – 7.32 (m, 1H), 6.83 (d, *J* = 8.57 Hz, 1H), 6.25 (s, 1H), 4.25 (q, *J* = 7.14 Hz, 2H),

3.86 (s, 3H), 2.23 (s, 3H), 1.33 (t,  $J = 7.14$  Hz, 3H).  $^{13}\text{C}$  NMR (101 MHz, Chloroform- $d$ )  $\delta$  165.0, 159.4, 148.9 (t,  $J = 22.57$  Hz), 130.4, 127.3, 127.0, 125.7, 122.7 (t,  $J = 7.81$  Hz), 111.0 (t,  $J = 236.67$  Hz), 109.8, 61.2, 55.5, 16.4, 14.3.  $^{19}\text{F}$  NMR (377 MHz, Chloroform- $d$ )  $\delta$  -116.1. HRMS-ESI: Found  $[\text{M}+\text{Na}]^+ = 293.0961$ ;  $\text{C}_{14}\text{H}_{16}\text{F}_2\text{O}_3\text{Na}$  requires 293.0960.

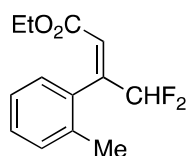

**Ethyl (*E*)-4,4-difluoro-3-(*o*-tolyl)but-2-enoate (*E*-1f)**

Colorless oil.  $^1\text{H}$  NMR (400 MHz, Chloroform- $d$ )  $\delta$  7.54 (t,  $J = 55.5$  Hz, 1H), 7.32 – 7.16 (m, 4H), 6.04 (s, 1H), 4.28 (q,  $J = 7.1$  Hz, 2H), 2.30 (s, 3H), 1.34 (t,  $J = 7.1$  Hz, 3H).  $^{13}\text{C}$  NMR (101 MHz, Chloroform- $d$ )  $\delta$  164.5, 149.8 (t,  $J = 24.5$  Hz), 136.4, 134.0, 130.4, 129.4, 128.9, 126.9 (t,  $J = 7.7$  Hz), 125.5, 110.2 (t,  $J = 236.0$  Hz), 61.4, 20.2, 14.3.  $^{19}\text{F}$  NMR (377 MHz, Chloroform- $d$ )  $\delta$  -117.3 ppm. HRMS-ESI: Found  $[\text{M}+\text{Na}]^+ = 263.0849$ ;  $\text{C}_{13}\text{H}_{14}\text{F}_2\text{O}_2\text{Na}$  requires 263.0854.

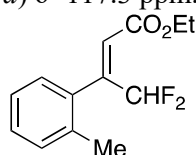

**Ethyl (*Z*)-4,4-difluoro-3-(*o*-tolyl)but-2-enoate (*Z*-1f)**

Colorless oil.  $^1\text{H}$  NMR (400 MHz, Chloroform- $d$ )  $\delta$  7.36 – 7.21 (m, 3H), 7.10 (d,  $J = 7.5$  Hz, 1H), 6.47 (t,  $J = 2.0$  Hz, 1H), 6.23 (t,  $J = 55.2$  Hz, 1H), 4.06 (q,  $J = 7.1$  Hz, 2H), 2.29 (s, 3H), 1.08 (t,  $J = 7.1$  Hz, 3H).  $^{13}\text{C}$  NMR (101 MHz, Chloroform- $d$ )  $\delta$  164.4, 147.3 (t,  $J = 20.4$  Hz), 136.3, 132.4, 129.9, 128.7, 128.1, 125.5, 123.7 (t,  $J = 8.7$  Hz), 114.3 (t,  $J = 243.0$  Hz), 60.7, 19.6, 13.8.  $^{19}\text{F}$  NMR (377 MHz, Chloroform- $d$ )  $\delta$  -117.3. HRMS-ESI: Found  $[\text{M}+\text{Na}]^+ = 263.0874$ ;  $\text{C}_{13}\text{H}_{14}\text{F}_2\text{O}_2\text{Na}$  requires 263.0854.

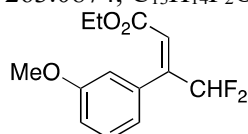

**Ethyl (*E*)-4,4-difluoro-3-(3-methoxyphenyl)but-2-enoate (*E*-1g)**

Yellow oil.  $^1\text{H}$  NMR (400 MHz, Chloroform- $d$ )  $\delta$  7.66 (t,  $J = 54.8$  Hz, 1H), 7.35 – 7.25 (m, 1H), 7.15 – 7.10 (m, 1H), 7.06 (s, 1H), 7.02 – 6.93 (m, 1H), 6.29 (s, 1H), 4.27 (q,  $J = 7.2$  Hz, 2H), 3.83 (s, 3H), 1.34 (t,  $J = 7.1$  Hz, 3H).  $^{13}\text{C}$  NMR (101 MHz, Chloroform- $d$ )  $\delta$  164.7, 159.6, 149.0 (t,  $J = 23.3$  Hz), 135.4, 129.7, 125.0 (t,  $J = 7.9$  Hz), 120.6, 115.4, 113.8, 110.6 (t,  $J = 236.9$  Hz), 61.4, 55.4, 14.2.  $^{19}\text{F}$  NMR (377 MHz, Chloroform- $d$ )  $\delta$  -116.2. HRMS-ESI: Found  $[\text{M}+\text{Na}]^+ = 279.0826$ ;  $\text{C}_{13}\text{H}_{14}\text{F}_2\text{O}_3\text{Na}$  requires 279.0803.

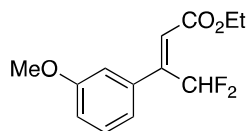

**Ethyl (*Z*)-4,4-difluoro-3-(3-methoxyphenyl)but-2-enoate (*Z*-1g)**

Yellow oil.  $^1\text{H}$  NMR (400 MHz, Chloroform- $d$ )  $\delta$  7.30 (t,  $J = 15.9$  Hz, 1H), 6.93 (ddd,  $J = 8.4$ , 2.6, 1.0 Hz, 1H), 6.84 (d,  $J = 7.6$  Hz, 1H), 6.81 (t,  $J = 2.1$  Hz, 1H), 6.35 (s, 1H), 6.23 (t,  $J = 55.3$  Hz, 1H), 4.06 (q,  $J = 7.1$  Hz, 2H), 3.81 (s, 3H), 1.09 (t,  $J = 7.1$  Hz, 3H).  $^{13}\text{C}$  NMR (101 MHz, Chloroform- $d$ )  $\delta$  164.9, 159.4, 146.6 (t,  $J = 20.2$  Hz), 134.0, 129.4, 123.2 (t,  $J = 8.9$  Hz), 120.9, 114.6, 114.3 (t,  $J = 242.9$  Hz), 114.2, 61.0, 55.4, 14.0.  $^{19}\text{F}$  NMR (377 MHz, Chloroform- $d$ )  $\delta$  -116.3. HRMS-ESI: Found  $[\text{M}+\text{Na}]^+ = 279.0800$ ;  $\text{C}_{13}\text{H}_{14}\text{F}_2\text{O}_3\text{Na}$  requires 279.0803.

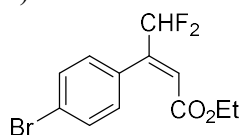

**Ethyl (*E*)-3-(4-bromophenyl)-4,4-difluorobut-2-enoate (1h)**

Colorless oil.  $^1\text{H}$  NMR (400 MHz, Chloroform-*d*)  $\delta$  7.74 (t,  $J = 54.65$  Hz, 1H), 7.53 (d,  $J = 8.50$  Hz, 2H), 7.41 (d,  $J = 8.37$  Hz, 2H), 6.28 (s, 1H), 4.26 (q,  $J = 7.14$  Hz, 2H), 1.33 (t,  $J = 7.12$  Hz, 3H).  $^{13}\text{C}$  NMR (101 MHz, Chloroform-*d*)  $\delta$  164.4 (d,  $J = 1.99$  Hz), 148.0 (t,  $J = 23.47$  Hz), 132.9, 131.9, 129.8, 125.2 (t,  $J = 7.83$  Hz), 110.5 (t,  $J = 236.87$  Hz), 61.5, 14.2.  $^{19}\text{F}$  NMR (376 MHz, Chloroform-*d*)  $\delta$  -116.2. HRMS-ESI: Found  $[\text{M}+\text{Na}]^+ = 326.9813$ ;  $\text{C}_{12}\text{H}_{11}\text{F}_2\text{BrO}_2\text{Na}$  requires 326.9803 ( $^{79}\text{Br}$ ).

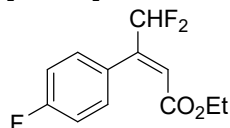

**Ethyl (*E*)-4-(4-fluorophenyl)-3-(difluoromethyl)but-2-enoate (1i)**

Colorless oil.  $^1\text{H}$  NMR (400 MHz, Chloroform-*d*)  $\delta$  7.81 (t,  $J = 56.02$  Hz, 1H), 7.55 – 7.50 (m, 2H), 7.14 – 7.01 (m, 2H), 6.26 (s, 1H), 4.27 (q,  $J = 7.14$  Hz, 2H), 1.34 (t,  $J = 7.14$  Hz, 3H).  $^{13}\text{C}$  NMR (101 MHz, Chloroform-*d*)  $\delta$  164.6, 163.8 (d,  $J = 250.23$  Hz), 148.1 (t,  $J = 23.40$  Hz), 130.3, 130.2, 124.8 (t,  $J = 7.34$  Hz), 115.8 (d,  $J = 21.72$  Hz), 110.6 (t,  $J = 236.72$  Hz), 61.4, 14.3.  $^{19}\text{F}$  NMR (377 MHz, Chloroform-*d*)  $\delta$  -111.0, -116.3. HRMS-ESI: Found  $[\text{M}+\text{Na}]^+ = 267.0610$ ;  $\text{C}_{12}\text{H}_{11}\text{F}_3\text{O}_2\text{Na}$  requires 267.0603.

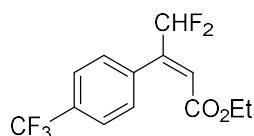

**Ethyl (*E*)-4-(4-(trifluoromethyl)phenyl)-3-(difluoromethyl)but-2-enoate (1j)**

Colorless oil.  $^1\text{H}$  NMR (400 MHz, Chloroform-*d*)  $\delta$  7.83 – 7.48 (m, 5H), 6.31 (td,  $J = 0.88$ , 0.70 Hz, 1H), 4.29 (q,  $J = 7.13$  Hz, 2H), 1.35 (t,  $J = 7.15$  Hz, 3H).  $^{13}\text{C}$  NMR (101 MHz, Chloroform-*d*)  $\delta$  164.3 (t,  $J = 1.87$  Hz), 147.9 (t,  $J = 23.66$  Hz), 137.6, 131.8 (q,  $J = 32.67$  Hz), 128.7, 126.4 (t,  $J = 7.80$  Hz), 125.6 (q,  $J = 3.76$  Hz), 124.0 (q,  $J = 274.50$  Hz), 110.4 (t,  $J = 236.99$  Hz), 61.7, 14.3.  $^{19}\text{F}$  NMR (377 MHz, Chloroform-*d*)  $\delta$  -62.9, -116.1. HRMS-ESI: Found  $[\text{M}+\text{Na}]^+ = 317.0566$ ;  $\text{C}_{13}\text{H}_{11}\text{F}_5\text{O}_2\text{Na}$  requires 317.0571.

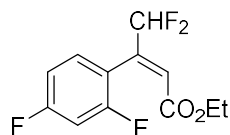

**Ethyl (*E*)-3-(2,4-difluorophenyl)-4-(difluoromethyl)but-2-enoate (1k)**

Colorless oil.  $^1\text{H}$  NMR (400 MHz, Chloroform-*d*)  $\delta$  7.55 (dt,  $J = 54.70$ , 1.09 Hz, 1H), 7.44 – 7.36 (m, 1H), 6.98 – 6.83 (m, 2H), 6.24 (s, 1H), 4.28 (q,  $J = 7.15$  Hz, 2H), 1.34 (t,  $J = 7.15$  Hz, 3H).  $^{13}\text{C}$  NMR (101 MHz, Chloroform-*d*)  $\delta$  164.8 (d,  $J = 11.95$  Hz), 164.2 (t,  $J = 1.72$  Hz), 162.0 (dd,  $J = 60.43$ , 11.87 Hz), 159.2 (d,  $J = 11.96$  Hz), 142.8 (t,  $J = 25.78$  Hz), 131.9 (dd,  $J = 9.83$ , 3.84 Hz), 128.8 – 127.3 (m), 111.6 (dd,  $J = 21.44$ , 3.80 Hz), 110.0 (dd,  $J = 353.08$ , 237.82 Hz), 104.7 (t,  $J = 26.25$  Hz), 61.6, 14.2.  $^{19}\text{F}$  NMR (377 MHz, Chloroform-*d*)  $\delta$  -107.6 (d,  $J = 8.80$  Hz), -109.2 (dt,  $J = 8.76$ , 7.22 Hz), -116.8 (d,  $J = 7.25$  Hz). HRMS-ESI: Found  $[\text{M}+\text{Na}]^+ = 285.0516$ ;  $\text{C}_{12}\text{H}_{10}\text{F}_4\text{O}_2\text{Na}$  requires 285.0509.

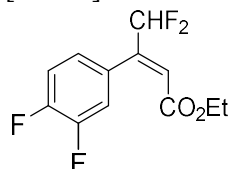

**Ethyl (*E*)-3-(3,4-difluorophenyl)-4-(difluoromethyl)but-2-enoate (1l)**

Colorless oil.  $^1\text{H}$  NMR (400 MHz, Chloroform-*d*)  $\delta$  7.66 (t,  $J = 55.00$  Hz, 1H), 7.46 – 7.34 (m, 1H), 7.31 – 7.26 (m, 1H), 7.23 – 7.14 (m, 1H), 6.26 (s, 1H), 4.27 (q,  $J = 7.15$  Hz, 2H), 1.34 (t,  $J = 7.14$  Hz, 3H).  $^{13}\text{C}$  NMR (101 MHz, Chloroform-*d*)  $\delta$  164.3, 152.1 (dd,  $J = 127.47$ , 12.48 Hz), 149.6 (dd,  $J = 124.19$ , 12.48 Hz), 147.0 (t,  $J = 23.72$  Hz), 130.8, 125.7 (t,  $J = 7.39$  Hz),

125.1 – 124.4 (m), 117.8, 117.6, 110.4 (t,  $J = 236.89$  Hz), 61.6, 14.2.  $^{19}\text{F}$  NMR (377 MHz, Chloroform-*d*)  $\delta$  -116.4, -135.4 (d,  $J = 21.22$  Hz), -136.6 (d,  $J = 21.30$  Hz). HRMS-ESI: Found  $[\text{M}+\text{Na}]^+ = 285.0511$ ;  $\text{C}_{12}\text{H}_{10}\text{F}_4\text{O}_2\text{Na}$  requires 285.0509.

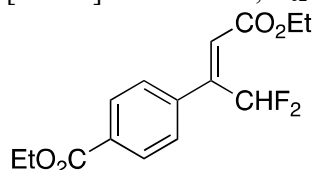

**Ethyl (Z)-4-(4-ethoxy-1,1-difluoro-4-oxobut-2-en-2-yl)benzoate (Z-1m)**

Colorless oil.  $^1\text{H}$  NMR (400 MHz, Chloroform-*d*)  $\delta$  8.14 – 8.03 (m, 2H), 7.62 (d,  $J = 54.6$  Hz, 1H), 7.60 (d,  $J = 8.2$  Hz, 2H), 6.32 (s, 1H), 4.40 (q,  $J = 7.2$  Hz, 2H), 4.28 (q,  $J = 7.2$  Hz, 2H), 1.40 (t,  $J = 7.1$  Hz, 3H), 1.35 (t,  $J = 7.2$  Hz, 3H).  $^{13}\text{C}$  NMR (101 MHz, Chloroform-*d*)  $\delta$  166.1, 164.4, 148.3 (t,  $J = 23.4$  Hz), 138.3, 131.7, 129.8, 128.3, 126.0 (t,  $J = 7.8$  Hz), 110.5 (t,  $J = 237.1$  Hz), 61.6, 61.4, 14.5, 14.3.  $^{19}\text{F}$  NMR (377 MHz, Chloroform-*d*)  $\delta$  -116.1. HRMS-ESI: Found  $[\text{M}+\text{Na}]^+ = 321.0905$ ;  $\text{C}_{15}\text{H}_{16}\text{F}_2\text{O}_4\text{Na}$  requires 321.0909.

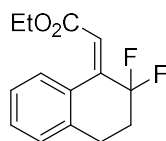

**Ethyl (E)-2-(2,2-difluoro-3,4-dihydronaphthalen-1(2H)-ylidene)acetate (1n)**

White solid.  $^1\text{H}$  NMR (400 MHz, Chloroform-*d*)  $\delta$  7.56 (d,  $J = 7.96$  Hz, 1H), 7.31 (td,  $J = 7.52$ , 1.30 Hz, 1H), 7.23 – 7.15 (m, 2H), 6.39 (t,  $J = 2.03$  Hz, 1H), 4.24 (q,  $J = 7.14$  Hz, 2H), 3.05 (t,  $J = 6.82$  Hz, 2H), 2.39 (tt,  $J = 14.05$ , 6.83 Hz, 2H), 1.28 (t,  $J = 7.14$  Hz, 3H).  $^{13}\text{C}$  NMR (101 MHz, Chloroform-*d*)  $\delta$  167.1, 142.2 (t,  $J = 20.31$  Hz), 136.8, 130.2, 129.9, 129.8 (t,  $J = 2.12$  Hz), 128.4, 126.0, 119.8, 116.6 (t,  $J = 7.98$  Hz), 61.1, 32.3 (t,  $J = 25.36$  Hz), 26.4 (t,  $J = 5.33$  Hz), 14.2.  $^{19}\text{F}$  NMR (377 MHz, Chloroform-*d*)  $\delta$  -99.0. HRMS-ESI: Found  $[\text{M}+\text{Na}]^+ = 275.0860$ ;  $\text{C}_{14}\text{H}_{14}\text{F}_2\text{O}_2\text{Na}$  requires 275.0854.

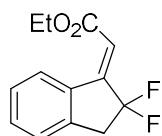

**Ethyl (E)-2-(2,2-difluoro-2,3-dihydro-1H-inden-1-ylidene)acetate (1o)**

Yellow oil.  $^1\text{H}$  NMR (400 MHz, Chloroform-*d*)  $\delta$  8.73 (d,  $J = 7.45$  Hz, 1H), 7.45 – 7.28 (m, 3H), 6.33 (t,  $J = 2.22$  Hz, 1H), 4.29 (q,  $J = 7.11$  Hz, 2H), 3.48 (t,  $J = 13.72$  Hz, 2H), 1.36 (t,  $J = 7.12$  Hz, 3H).  $^{13}\text{C}$  NMR (101 MHz, Chloroform-*d*)  $\delta$  166.0 (t,  $J = 1.87$  Hz), 149.7 (t,  $J = 21.62$  Hz), 141.2 (t,  $J = 5.45$  Hz), 133.9 (t,  $J = 2.78$  Hz), 132.1, 129.2, 128.1, 126.1 (t,  $J = 250.07$  Hz), 125.1 (t,  $J = 1.98$  Hz), 115.9 (t,  $J = 3.27$  Hz), 60.9, 40.6 (t,  $J = 26.27$  Hz), 14.4.  $^{19}\text{F}$  NMR (377 MHz, Chloroform-*d*)  $\delta$  -94.6. HRMS-ESI: Found  $[\text{M}+\text{Na}]^+ = 261.0702$ ;  $\text{C}_{13}\text{H}_{12}\text{F}_2\text{O}_2\text{Na}$  requires 261.0698.

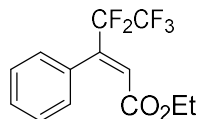

**Ethyl (E)-4,4,5,5,5-pentafluoro-3-phenylpent-2-enoate (1q)**

Colorless oil.  $^1\text{H}$  NMR (400 MHz, Chloroform-*d*)  $\delta$  7.49 – 7.34 (m, 3H), 7.28 (d,  $J = 6.62$  Hz, 2H), 6.68 (s, 1H), 4.04 (q,  $J = 7.14$  Hz, 2H), 1.04 (t,  $J = 7.15$  Hz, 3H).  $^{13}\text{C}$  NMR (101 MHz, Chloroform-*d*)  $\delta$  164.0, 141.8 (t,  $J = 21.54$  Hz), 131.4, 129.3, 129.0, 128.1, 127.8 (t,  $J = 8.36$  Hz), 118.9 (qt,  $J = 287.00$ , 37.74 Hz), 115.6 – 108.9 (m), 61.1, 13.6.  $^{19}\text{F}$  NMR (377 MHz, Chloroform-*d*)  $\delta$  -82.0 (t,  $J = 2.02$  Hz), -115.0 (q,  $J = 2.32$  Hz). HRMS-ESI: Found  $[\text{M}+\text{Na}]^+ = 317.0566$ ;  $\text{C}_{13}\text{H}_{11}\text{F}_5\text{O}_2\text{Na}$  requires 317.0571.

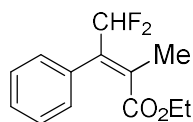

**Ethyl (*E*)-4,4-difluoro-2-methyl-3-phenylbut-2-enoate (1r)**

Colorless oil.  $^1\text{H}$  NMR (400 MHz, Chloroform-*d*)  $\delta$  7.44 – 7.36 (m, 3H), 7.24 – 7.19 (m, 2H), 6.62 (t,  $J = 55.2$  Hz, 1H), 3.88 (q,  $J = 7.1$  Hz, 2H), 2.18 (t,  $J = 2.9$  Hz, 3H), 0.83 (t,  $J = 7.1$  Hz, 3H).  $^{13}\text{C}$  NMR (101 MHz, Chloroform-*d*)  $\delta$  169.2, 136.1 (d,  $J = 37.4$  Hz), 136.6 – 135.7 (m), 134.7, 129.2, 128.3, 128.1, 112.5 (t,  $J = 237.7$  Hz), 61.1, 15.4, 13.6.  $^{19}\text{F}$  NMR (377 MHz, Chloroform-*d*)  $\delta$  -114.1 (s). HRMS-ESI: Found  $[\text{M}+\text{Na}]^+ = 263.0860$ ;  $\text{C}_{13}\text{H}_{14}\text{F}_2\text{O}_2\text{Na}$  requires 263.0854.

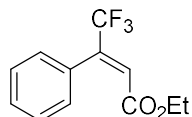

**Ethyl (*E*)-4,4,4-trifluoro-3-phenylbut-2-enoate (1s)**

Colorless oil.  $^1\text{H}$  NMR (400 MHz, Chloroform-*d*)  $\delta$  7.46 – 7.35 (m, 3H), 7.32 – 7.26 (m, 2H), 6.61 (d,  $J = 1.36$  Hz, 1H), 4.04 (q,  $J = 7.14$  Hz, 2H), 1.06 (t,  $J = 7.14$  Hz, 3H).  $^{13}\text{C}$  NMR (101 MHz, Chloroform-*d*)  $\delta$  164.3, 142.5 (q,  $J = 30.58$  Hz), 131.2, 129.4, 128.8, 128.3, 124.7 (q,  $J = 5.45$  Hz), 124.0, 61.2, 13.9.  $^{19}\text{F}$  NMR (377 MHz, Chloroform-*d*)  $\delta$  -67.5. HRMS-ESI: Found  $[\text{M}+\text{Na}]^+ = 267.0612$ ;  $\text{C}_{12}\text{H}_{11}\text{F}_3\text{O}_2\text{Na}$  requires 267.0603.

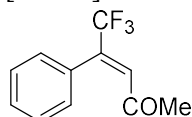

**(*E*)-5,5,5-trifluoro-4-phenylpent-3-en-2-one (1t)**

Colorless oil.  $^1\text{H}$  NMR (400 MHz, Chloroform-*d*)  $\delta$  7.49 – 7.38 (m, 3H), 7.34 – 7.28 (m, 2H), 6.71 (q,  $J = 1.35$  Hz, 1H), 1.90 (s, 3H).  $^{13}\text{C}$  NMR (101 MHz, Chloroform-*d*)  $\delta$  199.4, 139.2 (q,  $J = 30.93$  Hz), 132.6 (q,  $J = 4.90$  Hz), 131.0, 130.0, 129.2, 128.9, 123.0 (q,  $J = 276.36$  Hz), 30.6.  $^{19}\text{F}$  NMR (376 MHz, Chloroform-*d*)  $\delta$  -67.2. HRMS-ESI: Found  $[\text{M}+\text{Na}]^+ = 237.0486$ ;  $\text{C}_{11}\text{H}_9\text{F}_3\text{ONa}$  requires 237.0498.

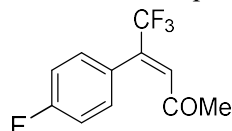

**(*E*)-5,5,5-trifluoro-4-(4-fluorophenyl)pent-3-en-2-one (1u)**

Colorless oil.  $^1\text{H}$  NMR (400 MHz, Chloroform-*d*)  $\delta$  7.33 – 7.27 (m, 2H), 7.16 – 7.07 (m, 2H), 6.74 (q,  $J = 1.30$  Hz, 1H), 1.97 (s, 3H).  $^{13}\text{C}$  NMR (101 MHz, Chloroform-*d*)  $\delta$  198.9, 163.7 (d,  $J = 250.53$  Hz), 138.1 (q,  $J = 31.06$  Hz), 132.7 (q,  $J = 4.77$  Hz), 126.8 (d,  $J = 3.62$  Hz), 122.8 (d,  $J = 275.43$  Hz), 116.2, 116.0, 30.8.  $^{19}\text{F}$  NMR (376 MHz, Chloroform-*d*)  $\delta$  -59.4, -111.3. HRMS-ESI: Found  $[\text{M}+\text{Na}]^+ = 255.0409$ ;  $\text{C}_{11}\text{H}_8\text{F}_4\text{ONa}$  requires 255.0403.

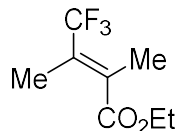

**Ethyl (*E*)-4,4,4-trifluoro-2,3-dimethylbut-2-enoate (1v)**

Colorless oil.  $^1\text{H}$  NMR (400 MHz, Chloroform-*d*)  $\delta$  4.26 (q,  $J = 7.1$  Hz, 2H), 2.05 (qd,  $J = 2.7$ , 1.4 Hz, 3H), 1.92 (q,  $J = 1.6$  Hz, 3H), 1.33 (t,  $J = 7.1$  Hz, 3H).  $^{13}\text{C}$  NMR (Chloroform-*d*, 101 MHz)  $\delta$  169.1, 135.2 (t,  $J = 3.3$  Hz), 128.5 (q,  $J = 29.7$  Hz), 124.2 (d,  $J = 276.2$  Hz), 61.5, 16.4 (q,  $J = 2.4$  Hz), 15.3 (q,  $J = 3.0$  Hz), 14.2.  $^{19}\text{F}$  NMR (Chloroform-*d*, 376 MHz)  $\delta$  -61.6 (s). HRMS-ESI: Found  $[\text{M}+\text{Na}]^+ = 219.0606$ ;  $\text{C}_8\text{H}_{11}\text{F}_3\text{O}_2\text{Na}$  requires 219.0603.



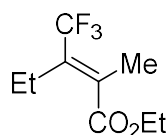

#### Ethyl (*E*)-2-methyl-3-(trifluoromethyl)pent-2-enoate (**1w**)

Colorless oil.  $^1\text{H}$  NMR (400 MHz, Chloroform-*d*)  $\delta$  4.26 (q,  $J = 7.2$  Hz, 2H), 2.37 – 2.20 (m, 2H), 2.04 (dtd,  $J = 3.5, 2.6, 0.9$  Hz, 3H), 1.33 (t,  $J = 7.1$  Hz, 3H), 1.16 – 1.02 (m, 3H).  $^{13}\text{C}$  NMR (Chloroform-*d*, 101 MHz)  $\delta$  169.0, 135.6 (q,  $J = 3.5$  Hz), 133.9 (q,  $J = 28.0$  Hz), 124.4 (q,  $J = 277.0$  Hz), 61.4 (d,  $J = 2.6$  Hz), 23.5 (q,  $J = 2.6$  Hz), 16.4 (d,  $J = 3.6$  Hz), 14.1 (d,  $J = 3.7$  Hz), 13.7 (d,  $J = 3.5$  Hz).  $^{19}\text{F}$  NMR (Chloroform-*d*, 376 MHz)  $\delta$  -59.8 (s). HRMS-ESI: Found  $[\text{M}+\text{Na}]^+ = 233.0738$ ;  $\text{C}_9\text{H}_{13}\text{F}_3\text{O}_2\text{Na}$  requires 233.0760.

#### 4. General procedure for synthesis of monofluoroalkenes

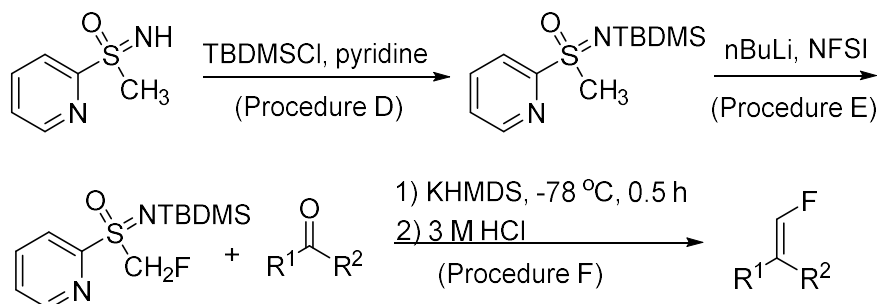

The corresponding monofluoroalkenes were prepared following procedure D-F, which was carried out according to the literature.<sup>3</sup>

#### New compounds:

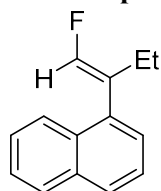

#### (*E*)-1-(1-fluorobut-1-en-2-yl)naphthalene (**3b**)

Colorless oil.  $^1\text{H}$  NMR (400 MHz, Chloroform-*d*)  $\delta$  8.02 – 7.94 (m, 1H), 7.91 – 7.85 (m, 1H), 7.84 – 7.80 (m,  $J = 8.26, 1.10$  Hz, 1H), 7.55 – 7.47 (m, 2H), 7.45 (dd,  $J = 8.25, 6.94$  Hz, 1H), 7.30 (dd,  $J = 6.95, 1.31$  Hz, 1H), 6.62 (d,  $J = 86.16$  Hz, 1H), 2.65 (qdd,  $J = 7.47, 2.67, 0.97$  Hz, 2H), 0.97 (t,  $J = 7.55$  Hz, 3H).  $^{13}\text{C}$  NMR (101 MHz, Chloroform-*d*)  $\delta$  146.2 (d,  $J = 261.20$  Hz), 134.2 (d,  $J = 10.17$  Hz), 133.9, 132.7 (d,  $J = 2.87$  Hz), 128.5, 128.2, 127.5 (d,  $J = 2.94$  Hz), 126.2, 126.0, 125.7, 125.3, 125.2 (d,  $J = 9.84$  Hz), 22.5 (d,  $J = 3.64$  Hz), 12.6 (d,  $J = 2.42$  Hz).  $^{19}\text{F}$  NMR (377 MHz, Chloroform-*d*)  $\delta$  -129.9. HRMS-ESI: Found  $[\text{M}+\text{Na}]^+ = 223.0881$ ;  $\text{C}_{14}\text{H}_{13}\text{FNa}$  requires 223.0893.

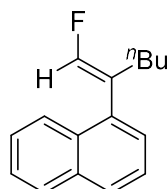

#### (*E*)-1-(1-fluorohex-1-en-2-yl)naphthalene (**3c**)

Colorless oil.  $^1\text{H}$  NMR (400 MHz, Chloroform-*d*)  $\delta$  8.03 – 7.94 (m, 1H), 7.91 – 7.84 (m, 1H), 7.81 (dt,  $J = 8.23, 1.07$  Hz, 1H), 7.56 – 7.47 (m, 2H), 7.44 (dd,  $J = 8.28, 7.00$  Hz, 1H), 7.29 (dd,  $J = 7.01, 1.28$  Hz, 1H), 6.64 (d,  $J = 86.36$  Hz, 1H), 2.61 (dddd,  $J = 7.48, 5.60, 4.01, 1.81$  Hz, 2H), 1.40 – 1.24 (m, 4H), 0.85 (t,  $J = 6.96$  Hz, 3H).  $^{13}\text{C}$  NMR (101 MHz, Chloroform-*d*)  $\delta$

146.6 (d,  $J = 261.19$  Hz), 134.6 (d,  $J = 10.23$  Hz), 133.9, 132.7 (d,  $J = 2.87$  Hz), 128.5, 128.1, 127.4 (d,  $J = 2.97$  Hz), 126.2, 126.0, 125.7, 125.3, 123.9 (d,  $J = 8.77$  Hz), 30.0 (d,  $J = 2.30$  Hz), 29.0 (d,  $J = 2.93$  Hz), 22.6, 14.0.  $^{19}\text{F}$  NMR (376 MHz, Chloroform- $d$ )  $\delta$  -129.4. HRMS-ESI: Found  $[\text{M}+\text{Na}]^+ = 251.1216$ ;  $\text{C}_{16}\text{H}_{17}\text{FNa}$  requires 251.1206.

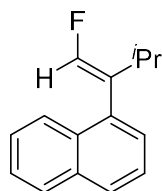

**(E)-1-(1-fluoro-3-methylbut-1-en-2-yl)naphthalene (3d)**

Colorless oil.  $^1\text{H}$  NMR (400 MHz, Chloroform- $d$ )  $\delta$  8.08 – 7.98 (m, 1H), 7.88 – 7.84 (m, 1H), 7.82 (dt,  $J = 8.26, 1.15$  Hz, 1H), 7.54 – 7.46 (m, 2H), 7.44 (dd,  $J = 8.27, 7.03$  Hz, 1H), 7.29 (dd,  $J = 7.05, 1.31$  Hz, 1H), 6.49 (d,  $J = 85.98$  Hz, 1H), 3.18 (hept,  $J = 6.98$  Hz, 1H), 1.39 – 0.77 (m, 6H).  $^{13}\text{C}$  NMR (101 MHz, Chloroform- $d$ )  $\delta$  146.3 (d,  $J = 263.26$  Hz), 133.8, 133.7 (d,  $J = 2.60$  Hz), 133.4 (d,  $J = 11.00$  Hz), 128.4 (d,  $J = 3.23$  Hz), 128.3, 128.1, 128.1 (d,  $J = 6.05$  Hz), 126.4, 126.0, 125.9, 125.0, 29.1 (d,  $J = 1.80$  Hz), 21.4.  $^{19}\text{F}$  NMR (377 MHz, Chloroform- $d$ )  $\delta$  -128.3. HRMS-ESI: Found  $[\text{M}+\text{Na}]^+ = 237.1064$ ;  $\text{C}_{15}\text{H}_{15}\text{FNa}$  requires 237.1050.

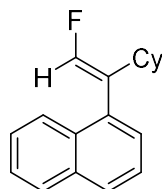

**(E)-1-(1-cyclohexyl-2-fluorovinyl)naphthalene (3e)**

Colorless oil.  $^1\text{H}$  NMR (400 MHz, Chloroform- $d$ )  $\delta$  8.09 – 7.99 (m, 1H), 7.90 – 7.78 (m, 2H), 7.55 – 7.40 (m, 3H), 7.32 – 7.27 (m, 1H), 6.49 (d,  $J = 86.33$  Hz, 1H), 2.84 (tt,  $J = 11.99, 3.48$  Hz, 1H), 2.02 – 1.56 (m, 6H), 1.40 – 1.22 (m, 3H), 1.12 – 1.00 (m, 1H).  $^{13}\text{C}$  NMR (101 MHz, Chloroform- $d$ )  $\delta$  146.3 (d,  $J = 263.14$  Hz), 133.7 (d,  $J = 5.47$  Hz), 133.7, 133.6, 128.3, 128.3, 128.0, 127.5 (d,  $J = 6.43$  Hz), 126.5, 125.9 (d,  $J = 14.85$  Hz), 125.3, 125.0, 39.3, 31.4, 26.7, 26.0.  $^{19}\text{F}$  NMR (377 MHz, Chloroform- $d$ )  $\delta$  -128.5. HRMS-ESI: Found  $[\text{M}+\text{Na}]^+ = 277.1373$ ,  $\text{C}_{18}\text{H}_{19}\text{FNa}$  requires 277.1363.

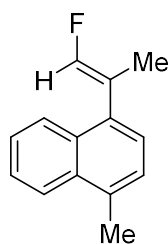

**(E)-1-(1-fluoroprop-1-en-2-yl)-4-methylnaphthalene (3f)**

Colorless oil.  $^1\text{H}$  NMR (400 MHz, Chloroform- $d$ )  $\delta$  8.08 – 7.91 (m, 2H), 7.59 – 7.46 (m, 2H), 7.28 (dd,  $J = 7.09, 1.03$  Hz, 1H), 7.21 (d,  $J = 7.08$  Hz, 1H), 6.67 (dq,  $J = 86.10, 1.59$  Hz, 1H), 2.70 (d,  $J = 0.94$  Hz, 3H), 2.12 (dd,  $J = 3.63, 1.59$  Hz, 3H).  $^{13}\text{C}$  NMR (101 MHz, Chloroform- $d$ )  $\delta$  146.8 (d,  $J = 260.75$  Hz), 134.5, 134.2 (d,  $J = 9.89$  Hz), 133.0, 132.2 (d,  $J = 2.96$  Hz), 126.4 (d,  $J = 2.99$  Hz), 126.2, 126.1, 125.9, 125.9, 124.7, 119.4 (d,  $J = 9.25$  Hz), 19.6, 15.7 (d,  $J = 4.17$  Hz).  $^{19}\text{F}$  NMR (377 MHz, Chloroform- $d$ )  $\delta$  -128.8. HRMS-ESI: Found  $[\text{M}+\text{Na}]^+ = 223.0876$ ;  $\text{C}_{14}\text{H}_{13}\text{FNa}$  requires 223.0893.

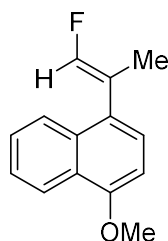

**(E)-1-(1-fluoroprop-1-en-2-yl)-4-methoxynaphthalene (3g)**

Colorless oil.  $^1\text{H}$  NMR (400 MHz, Chloroform-*d*)  $\delta$  8.35 – 8.23 (m, 1H), 7.94 – 7.83 (m, 1H), 7.58 – 7.43 (m, 2H), 7.21 (d,  $J = 7.82$  Hz, 1H), 6.76 (d,  $J = 7.78$  Hz, 1H), 6.66 (dq,  $J = 85.91$ , 1.58 Hz, 1H), 4.01 (s, 3H), 2.09 (dd,  $J = 3.66$ , 1.58 Hz, 3H).  $^{13}\text{C}$  NMR (101 MHz, Chloroform-*d*)  $\delta$  155.4, 146.8 (d,  $J = 260.80$  Hz), 133.1 (d,  $J = 2.98$  Hz), 128.1 (d,  $J = 10.27$  Hz), 126.8, 126.7 (d,  $J = 2.99$  Hz), 125.9, 125.3, 125.3, 122.5, 119.2 (d,  $J = 9.29$  Hz), 103.3, 55.7, 15.7 (d,  $J = 4.09$  Hz).  $^{19}\text{F}$  NMR (377 MHz, Chloroform-*d*)  $\delta$  -128.7. HRMS-ESI: Found  $[\text{M}+\text{Na}]^+ = 239.0855$ ;  $\text{C}_{14}\text{H}_{13}\text{FONa}$  requires 239.0843.

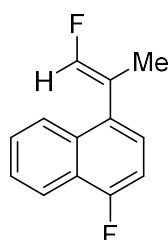

**(E)-1-fluoro-4-(1-fluoroprop-1-en-2-yl)naphthalene (3h)**

Colorless oil.  $^1\text{H}$  NMR (400 MHz, Chloroform-*d*)  $\delta$  8.18 – 8.09 (m, 1H), 7.99 – 7.90 (m, 1H), 7.62 – 7.51 (m, 2H), 7.27 – 7.19 (m, 1H), 7.10 (dd,  $J = 10.32$ , 7.83 Hz, 1H), 6.66 (dq,  $J = 85.60$ , 1.55 Hz, 1H), 2.10 (dd,  $J = 3.65$ , 1.58 Hz, 3H).  $^{13}\text{C}$  NMR (101 MHz, Chloroform-*d*)  $\delta$  158.6 (d,  $J = 252.24$  Hz), 147.0 (d,  $J = 262.54$  Hz), 133.5 (dd,  $J = 4.75$ , 3.02 Hz), 131.9 (dd,  $J = 10.15$ , 4.48 Hz), 127.2, 126.5 (dd,  $J = 8.28$ , 3.11 Hz), 126.3 (d,  $J = 1.89$  Hz), 125.5 (d,  $J = 2.78$  Hz), 124.1 (d,  $J = 16.40$  Hz), 121.1 (d,  $J = 5.55$  Hz), 118.8 (d,  $J = 9.83$  Hz), 109.0 (d,  $J = 19.94$  Hz), 15.6 (d,  $J = 4.01$  Hz).  $^{19}\text{F}$  NMR (377 MHz, Chloroform-*d*)  $\delta$  -123.4, -127.8. HRMS-ESI: Found  $[\text{M}+\text{Na}]^+ = 227.0654$ ;  $\text{C}_{13}\text{H}_{10}\text{F}_2\text{Na}$  requires 227.0643.

**5. General procedure for asymmetric hydrogenation**

A vial was charged with substrate (0.15 mmol) and Ir-complex (1 mol%). Dry  $\text{CH}_2\text{Cl}_2$  (1.5 ml) was added (so that the concentration of the substrate was 0.1 M) and the vial was placed in a high-pressure hydrogenation apparatus. The reactor was purged three times with Ar gas, then filled with  $\text{H}_2$ . The reaction was stirred at room temperature for 4-24 hours before the  $\text{H}_2$  pressure was released and the solvent was removed *in vacuo*. The crude product was filtered through on a short plug of silica. Conversions were determined by  $^1\text{H}$  NMR spectroscopy and *ee* values were determined by HPLC, SFC or GCMS using a chiral stationary phase.

The full characterizations of the new hydrogenated products are available below (in some specific cases the hydrogenated products are characterized in the mixture with de-fluorinated product).

### The characterization of the hydrogenated compounds:

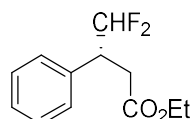

#### Ethyl (*R*)-4,4-difluoro-3-phenylbutanoate (2a)

Colorless oil.  $^1\text{H}$  NMR (400 MHz, Chloroform-*d*)  $\delta$  7.38 – 7.26 (m, 5H), 5.94 (td,  $J = 56.34$ , 3.39 Hz, 1H), 4.07 (qd,  $J = 7.13$ , 3.92 Hz, 2H), 3.69 – 3.57 (m, 1H), 2.96 (dd,  $J = 16.21$ , 5.92 Hz, 1H), 2.78 (dd,  $J = 16.24$ , 8.95 Hz, 1H), 1.15 (t,  $J = 7.11$  Hz, 3H).  $^{13}\text{C}$  NMR (101 MHz, Chloroform-*d*)  $\delta$  171.1, 135.9 (dd,  $J = 5.26$ , 2.62 Hz), 128.9, 128.9, 128.1, 117.1 (t,  $J = 244.93$  Hz), 60.9, 46.0 (t,  $J = 20.36$  Hz), 33.7 (dd,  $J = 5.18$ , 3.68 Hz), 14.2.  $^{19}\text{F}$  NMR (377 MHz, Chloroform-*d*)  $\delta$  -119.5 (d,  $J = 278.09$  Hz), -123.6 (d,  $J = 278.11$  Hz). HRMS-ESI: Found  $[\text{M}+\text{Na}]^+ = 251.0858$ ;  $\text{C}_{12}\text{H}_{14}\text{F}_2\text{O}_2\text{Na}$  requires 251.0854.

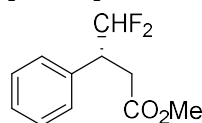

#### Methyl (*R*)-4,4-difluoro-3-phenylbutanoate (2b)

Colorless oil.  $^1\text{H}$  NMR (400 MHz, Chloroform-*d*)  $\delta$  7.38 – 7.26 (m, 5H), 5.94 (td,  $J = 56.34$ , 3.37 Hz, 1H), 3.68 – 3.56 (m, 1H), 3.62 (s, 3H), 2.98 (dd,  $J = 16.37$ , 5.90 Hz, 1H), 2.79 (dd,  $J = 16.36$ , 8.87 Hz, 1H).  $^{13}\text{C}$  NMR (101 MHz, Chloroform-*d*)  $\delta$  171.6, 135.9 (dd,  $J = 5.34$ , 2.36 Hz), 128.9, 128.8, 128.2, 117.1 (t,  $J = 244.93$  Hz), 52.1, 46.0 (t,  $J = 20.18$  Hz), 33.4 (dd,  $J = 5.18$ , 3.79 Hz).  $^{19}\text{F}$  NMR (377 MHz, Chloroform-*d*)  $\delta$  -119.4 (d,  $J = 278.11$  Hz), -123.7 (d,  $J = 278.14$  Hz). HRMS-ESI: Found  $[\text{M}+\text{Na}]^+ = 237.0704$ ;  $\text{C}_{11}\text{H}_{12}\text{F}_2\text{O}_2\text{Na}$  requires 237.0698.

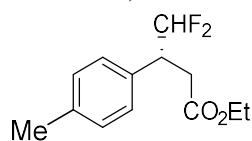

#### (*R*)-5,5-difluoro-4-(*p*-tolyl)pentan-2-one (2c)

Colorless oil.  $^1\text{H}$  NMR (400 MHz, Chloroform-*d*)  $\delta$  7.18-7.14 (m, 4H), 5.91 (td,  $J = 56.45$ , 3.42 Hz, 1H), 4.19 – 3.97 (m, 2H), 3.67 – 3.50 (m, 1H), 2.94 (dd,  $J = 16.20$ , 5.89 Hz, 1H), 2.75 (dd,  $J = 16.19$ , 9.01 Hz, 1H), 2.33 (s, 3H), 1.17 (t,  $J = 7.14$  Hz, 3H).  $^{13}\text{C}$  NMR (101 MHz, Chloroform-*d*)  $\delta$  171.2, 137.8, 132.8 (dd,  $J = 5.02$ , 2.84 Hz), 129.6, 128.7, 117.2 (t,  $J = 244.83$  Hz), 60.9, 45.6 (t,  $J = 20.32$  Hz), 33.7 (dd,  $J = 5.01$ , 3.74 Hz), 21.2, 14.2.  $^{19}\text{F}$  NMR (377 MHz, Chloroform-*d*)  $\delta$  -119.4 (d,  $J = 277.59$  Hz), -123.6 (d,  $J = 277.63$  Hz). HRMS-ESI: Found  $[\text{M}+\text{Na}]^+ = 265.1017$ ;  $\text{C}_{13}\text{H}_{16}\text{F}_2\text{O}_2\text{Na}$  requires 265.1011.

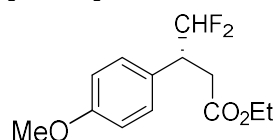

#### Ethyl (*S*)-4,4-difluoro-3-(4-methoxyphenyl)butanoate (2d)

Colorless oil.  $^1\text{H}$  NMR (400 MHz, Chloroform-*d*)  $\delta$  7.24 – 7.16 (m, 2H), 6.92 – 6.83 (m, 2H), 5.89 (td,  $J = 56.49$ , 3.36 Hz, 1H), 4.15 – 3.98 (m, 2H), 3.79 (s, 3H), 3.66 – 3.49 (m, 1H), 2.92 (dd,  $J = 16.15$ , 5.84 Hz, 1H), 2.73 (dd,  $J = 16.10$ , 9.14 Hz, 1H), 1.16 (t,  $J = 7.13$  Hz, 3H).  $^{13}\text{C}$  NMR (101 MHz, Chloroform-*d*)  $\delta$  171.2, 159.4, 129.9, 127.8 (dd,  $J = 5.52$ , 2.45 Hz), 117.2 (t,  $J = 244.82$  Hz), 114.3, 60.9, 55.4, 45.2 (t,  $J = 20.33$  Hz), 33.8 (dd,  $J = 5.06$ , 3.60 Hz), 14.2.  $^{19}\text{F}$  NMR (377 MHz, Chloroform-*d*)  $\delta$  -119.6 (d,  $J = 277.27$  Hz), -123.7 (d,  $J = 277.45$  Hz). HRMS-ESI: Found  $[\text{M}+\text{Na}]^+ = 281.0975$ ;  $\text{C}_{13}\text{H}_{16}\text{F}_2\text{O}_3\text{Na}$  requires 281.0960.

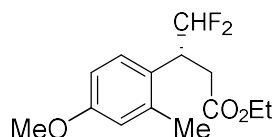

**Ethyl (*R*)-4,4-difluoro-3-(4-methoxy-2-methylphenyl)butanoate (2e)**

Colorless oil. <sup>1</sup>H NMR (400 MHz, Chloroform-*d*) δ 7.10 – 7.01 (m, 2H), 6.78 (d, *J* = 8.30 Hz, 1H), 5.89 (td, *J* = 56.55, 3.42 Hz, 1H), 4.15 – 3.99 (m, 2H), 3.81 (s, 3H), 3.58 – 3.48 (m, 1H), 2.91 (dd, *J* = 16.12, 5.87 Hz, 1H), 2.73 (dd, *J* = 16.11, 9.02 Hz, 1H), 2.20 (s, 3H), 1.17 (t, *J* = 7.14 Hz, 3H). <sup>13</sup>C NMR (101 MHz, Chloroform-*d*) δ 171.3, 157.6, 131.0, 127.4 (dd, *J* = 5.47, 2.72 Hz), 127.1, 127.0, 117.3 (t, *J* = 244.80 Hz), 110.1, 60.9, 55.4, 45.2 (t, *J* = 20.30 Hz), 33.8 (dd, *J* = 5.07, 3.59 Hz), 16.4, 14.2. <sup>19</sup>F NMR (377 MHz, Chloroform-*d*) δ -119.3 (d, *J* = 276.64 Hz), -123.7 (d, *J* = 276.68 Hz). HRMS-ESI: Found [M+Na]<sup>+</sup> = 295.1104; C<sub>14</sub>H<sub>18</sub>F<sub>2</sub>O<sub>3</sub>Na requires 295.1116.

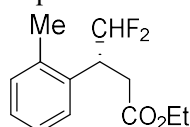

**Ethyl (*R*)-4,4-difluoro-3-(*o*-tolyl)butanoate (2f)**

Colorless oil. <sup>1</sup>H NMR (400 MHz, Chloroform-*d*) δ 7.24 – 7.16 (m, 4H), 5.88 (td, *J* = 56.5, 3.9 Hz, 1H), 4.10 – 3.91 (m, 3H), 2.96 (dd, *J* = 16.3, 5.9 Hz, 1H), 2.79 (dd, *J* = 16.3, 9.1 Hz, 1H), 2.42 (s, 3H), 1.14 (t, *J* = 7.1 Hz, 3H). <sup>13</sup>C NMR (101 MHz, Chloroform-*d*) δ 171.2, 137.5, 134.3 (dd, *J* = 4.8, 3.0 Hz), 130.8, 127.8, 127.2, 126.5, 117.3 (t, *J* = 244.9 Hz), 60.9, 40.8 (d, *J* = 20.5 Hz), 33.9 (t, *J* = 4.6 Hz), 20.1, 14.1. <sup>19</sup>F NMR (377 MHz, Chloroform-*d*) δ -119.3 (d, *J* = 277.2 Hz), -122.9 (d, *J* = 277.2 Hz). HRMS-ESI: Found [M+Na]<sup>+</sup> = 265.1012; C<sub>13</sub>H<sub>16</sub>F<sub>2</sub>O<sub>2</sub>Na requires 265.1011.

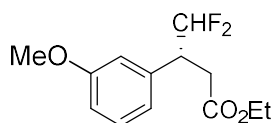

**Ethyl (*R*)-4,4-difluoro-3-(3-methoxyphenyl)butanoate (2g)**

Colorless oil. <sup>1</sup>H NMR (400 MHz, Chloroform-*d*) δ 7.30 – 7.22 (m, 1H), 6.90 – 6.80 (m, 3H), 5.93 (td, *J* = 56.4, 3.4 Hz, 1H), 4.08 (qd, *J* = 7.1, 3.9 Hz, 2H), 3.80 (s, 3H), 3.67 – 3.53 (m, 1H), 2.94 (dd, *J* = 16.3, 5.9 Hz, 1H), 2.76 (dd, *J* = 16.3, 8.9 Hz, 1H), 1.17 (t, *J* = 7.1 Hz, 3H). <sup>13</sup>C NMR (101 MHz, Chloroform-*d*) δ 171.1, 159.9, 137.4 (dd, *J* = 5.3, 2.6 Hz), 129.9, 121.1, 117.1 (t, *J* = 245.0 Hz), 114.8, 113.3, 61.0, 55.3, 46.0 (t, *J* = 20.4 Hz), 33.6 (dd, *J* = 4.9, 3.8 Hz), 14.2. <sup>19</sup>F NMR (377 MHz, Chloroform-*d*) δ -119.2 (d, *J* = 277.9 Hz), -123.5 (d, *J* = 277.8 Hz). HRMS-ESI: Found [M+Na]<sup>+</sup> = 281.0959; C<sub>13</sub>H<sub>16</sub>F<sub>2</sub>O<sub>3</sub>Na requires 281.0960.

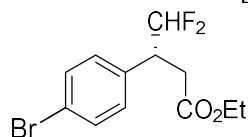

**Ethyl (*R*)-3-(4-bromophenyl)-4,4-difluorobutanoate (2h)**

Colorless oil. <sup>1</sup>H NMR (400 MHz, Chloroform-*d*) δ 7.38 – 7.27 (m, 4H), 5.94 (td, *J* = 56.3, 3.4 Hz, 1H), 4.07 (qd, *J* = 7.1, 4.0 Hz, 2H), 3.70 – 3.55 (m, 1H), 2.96 (dd, *J* = 16.2, 5.9 Hz, 1H), 2.78 (dd, *J* = 16.2, 9.0 Hz, 1H), 1.15 (t, *J* = 7.1 Hz, 3H). <sup>13</sup>C NMR (101 MHz, Chloroform-*d*) δ 171.1, 135.9 (dd, *J* = 5.4, 2.6 Hz), 128.9, 128.1, 117.1 (t, *J* = 245.3 Hz), 60.9, 46.0 (t, *J* = 20.4 Hz), 33.7 (dd, *J* = 5.1, 4.2 Hz), 14.2. <sup>19</sup>F NMR (377 MHz, Chloroform-*d*) δ -119.5 (d, *J* = 278.1 Hz), -123.5 (d, *J* = 278.4 Hz). HRMS-ESI: Found [M+Na]<sup>+</sup> = 328.9966; C<sub>12</sub>H<sub>13</sub>F<sub>2</sub>BrO<sub>2</sub>Na requires 328.9959 (Br<sup>79</sup>).

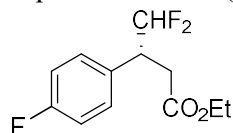

**Ethyl (R)-4,4-difluoro-3-(4-fluorophenyl)butanoate (2i)**

Colorless oil.  $^1\text{H}$  NMR (400 MHz, Chloroform-*d*)  $\delta$  7.30 – 7.17 (m, 2H), 7.10 – 6.98 (m, 2H), 5.91 (td,  $J = 56.29, 3.25$  Hz, 1H), 4.07 (qd,  $J = 7.15, 3.83$  Hz, 2H), 3.67 – 3.55 (m, 1H), 2.94 (dd,  $J = 16.26, 5.77$  Hz, 1H), 2.74 (dd,  $J = 16.24, 9.20$  Hz, 1H), 1.16 (t,  $J = 7.14$  Hz, 3H).  $^{13}\text{C}$  NMR (101 MHz, Chloroform-*d*)  $\delta$  171.0, 162.6 (d,  $J = 246.69$  Hz), 131.8 – 131.3 (m), 130.6 (d,  $J = 8.11$  Hz), 116.8 (t,  $J = 244.90$  Hz), 115.8 (d,  $J = 21.38$  Hz), 61.0, 45.3 (t,  $J = 20.50$  Hz), 33.8 (dd,  $J = 5.27, 3.57$  Hz), 14.2.  $^{19}\text{F}$  NMR (377 MHz, Chloroform-*d*)  $\delta$  -114.3, -120.1 (d,  $J = 278.54$  Hz), -123.4 (d,  $J = 278.79$  Hz). HRMS-ESI: Found  $[\text{M}+\text{Na}]^+ = 269.0766$ ;  $\text{C}_{12}\text{H}_{13}\text{F}_3\text{O}_2\text{Na}$  requires 269.0760

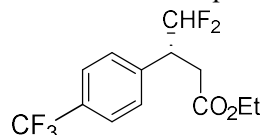**Ethyl (R)-4,4-difluoro-3-(4-(trifluoromethyl)phenyl)butanoate (2j)**

Colorless oil.  $^1\text{H}$  NMR (400 MHz, Chloroform-*d*)  $\delta$  7.61 (d,  $J = 8.15$  Hz, 2H), 7.42 (d,  $J = 8.01$  Hz, 2H), 5.96 (td,  $J = 56.12, 3.26$  Hz, 1H), 4.08 (qd,  $J = 7.12, 4.37$  Hz, 2H), 3.79 – 3.65 (m, 1H), 2.98 (dd,  $J = 16.48, 5.78$  Hz, 1H), 2.79 (dd,  $J = 16.49, 9.10$  Hz, 1H), 1.17 (t,  $J = 7.14$  Hz, 3H).  $^{13}\text{C}$  NMR (101 MHz, Chloroform-*d*)  $\delta$  170.7, 139.9, 130.5 (q,  $J = 32.62$  Hz), 129.4, 125.8 (q,  $J = 3.78$  Hz), 124.1 (q,  $J = 268.36$  Hz), 116.5 (t,  $J = 245.05$  Hz), 61.2, 45.8 (t,  $J = 20.62$  Hz), 33.6 (dd,  $J = 5.24, 3.62$  Hz), 14.1.  $^{19}\text{F}$  NMR (377 MHz, Chloroform-*d*)  $\delta$  -62.8, -120.5 (d,  $J = 280.50$  Hz), -122.8 (d,  $J = 280.48$  Hz). HRMS-ESI: Found  $[\text{M}+\text{Na}]^+ = 319.0734$ ;  $\text{C}_{13}\text{H}_{13}\text{F}_5\text{O}_2\text{Na}$  requires 319.0728

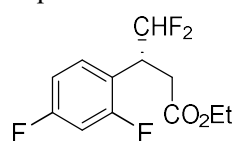**Ethyl (R)-3-(2,4-difluorophenyl)-4,4-difluorobutanoate (2k)**

Colorless oil.  $^1\text{H}$  NMR (400 MHz, Chloroform-*d*)  $\delta$  7.32 – 7.22 (m, 1H), 6.93 – 6.79 (m, 2H), 5.98 (tdd,  $J = 56.37, 3.90, 0.73$  Hz, 1H), 4.08 (qd,  $J = 7.16, 4.32$  Hz, 2H), 3.99 – 3.88 (m, 1H), 2.95 (dd,  $J = 16.37, 5.91$  Hz, 1H), 2.78 (dd,  $J = 16.37, 9.20$  Hz, 1H), 1.17 (t,  $J = 7.12$  Hz, 3H).  $^{13}\text{C}$  NMR (101 MHz, Chloroform-*d*)  $\delta$  170.7, 163.2 (dd,  $J = 145.91, 12.07$  Hz), 160.7 (dd,  $J = 145.84, 12.22$  Hz), 131.0 (dd,  $J = 9.70, 5.42$  Hz), 119.2 – 118.6 (m), 116.0 (t,  $J = 244.64$  Hz), 111.8 (dd,  $J = 21.26, 3.71$  Hz), 104.3 (dd,  $J = 26.64, 25.19$  Hz), 61.1, 39.1 (dd,  $J = 21.84, 0.98$  Hz), 32.9 (d,  $J = 3.79$  Hz), 14.2.  $^{19}\text{F}$  NMR (377 MHz, Chloroform-*d*)  $\delta$  -110.2 (d,  $J = 8.09$  Hz), -112.5 (dt,  $J = 7.48, 3.52$  Hz), -120.1 (dd,  $J = 279.82, 3.05$  Hz), -123.0 (dd,  $J = 279.54, 3.70$  Hz). HRMS-ESI: Found  $[\text{M}+\text{Na}]^+ = 287.0668$ ;  $\text{C}_{12}\text{H}_{12}\text{F}_4\text{O}_2\text{Na}$  requires 287.0666

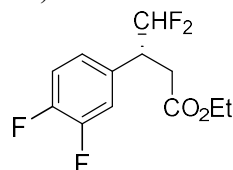**Ethyl (R)-3-(3,4-difluorophenyl)-4,4-difluorobutanoate (2l)**

Colorless oil.  $^1\text{H}$  NMR (400 MHz, Chloroform-*d*)  $\delta$  7.20 – 7.08 (m, 2H), 7.07 – 6.97 (m, 1H), 5.91 (td,  $J = 56.16, 3.12$  Hz, 1H), 4.17 – 4.00 (m, 2H), 3.68 – 3.51 (m, 1H), 2.92 (dd,  $J = 16.44, 5.70$  Hz, 1H), 2.72 (dd,  $J = 16.45, 9.22$  Hz, 1H), 1.18 (t,  $J = 7.15$  Hz, 3H).  $^{13}\text{C}$  NMR (101 MHz, Chloroform-*d*)  $\delta$  170.7, 151.6 (dd,  $J = 21.17, 12.48$  Hz), 149.1 (dd,  $J = 12.13, 8.57$  Hz), 132.7 (dd,  $J = 9.51, 5.59$  Hz), 126.2 – 122.6 (m), 118.0 (d,  $J = 17.64$  Hz), 117.7 (d,  $J = 17.28$  Hz), 116.4 (t,  $J = 245.14$  Hz), 61.2 (d,  $J = 5.35$  Hz), 45.2 (t,  $J = 20.42$  Hz), 33.7 (dd,  $J = 5.16, 3.52$  Hz), 14.2.  $^{19}\text{F}$  NMR (377 MHz, Chloroform-*d*)  $\delta$  -120.7 (d,  $J = 280.16$  Hz), -123.1 (d,  $J = 280.17$  Hz), -136.8 (d,  $J = 21.48$  Hz), -138.6 (d,  $J = 21.19$  Hz). HRMS-ESI: Found  $[\text{M}+\text{Na}]^+ = 287.0671$ ;  $\text{C}_{12}\text{H}_{12}\text{F}_4\text{O}_2\text{Na}$  requires 287.0666

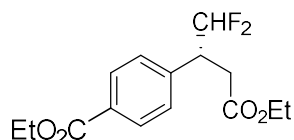

**Ethyl (R)-4-(4-ethoxy-1,1-difluoro-4-oxobutan-2-yl)benzoate (2m)**

Colorless oil.  $^1\text{H}$  NMR (400 MHz, Chloroform-*d*)  $\delta$  8.02 (dd,  $J = 8.4, 2.0$  Hz, 2H), 7.36 (d,  $J = 8.3$  Hz, 2H), 5.95 (td,  $J = 56.2, 3.4$  Hz, 1H), 4.37 (q,  $J = 7.1$  Hz, 2H), 4.06 (qd,  $J = 7.1, 4.8$  Hz, 2H), 3.77 – 3.63 (m, 1H), 2.97 (dd,  $J = 16.4, 5.8$  Hz, 1H), 2.79 (dd,  $J = 16.4, 9.1$  Hz, 1H), 1.39 (t,  $J = 7.1$  Hz, 3H), 1.16 (t,  $J = 7.1$  Hz, 3H).  $^{13}\text{C}$  NMR (101 MHz, Chloroform-*d*)  $\delta$  170.8, 166.3, 140.8 (dd,  $J = 4.8, 2.5$  Hz), 130.1, 130.1, 129.0, 116.6 (t,  $J = 245.1$  Hz), 61.2, 61.1, 46.0 (t,  $J = 20.6$  Hz), 34.0 (dd,  $J = 5.0, 3.9$  Hz), 14.5, 14.2.  $^{19}\text{F}$  NMR (377 MHz, Chloroform-*d*)  $\delta$  -120.0 (d,  $J = 279.3$  Hz), -122.9 (d,  $J = 279.7$  Hz). HRMS-ESI: Found  $[\text{M}+\text{Na}]^+ = 323.1068$ ;  $\text{C}_{15}\text{H}_{18}\text{F}_2\text{O}_4\text{Na}$  requires 323.1065.

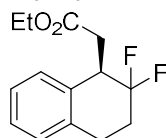

**Ethyl (R)-2-(2,2-difluoro-1,2,3,4-tetrahydronaphthalen-1-yl)acetate (2n)**

Colorless oil.  $^1\text{H}$  NMR (400 MHz, Chloroform-*d*)  $\delta$  7.22 – 7.08 (m, 4H), 4.21 (q,  $J = 7.14$  Hz, 2H), 3.85 (tt,  $J = 12.72, 6.41$  Hz, 1H), 3.03 (t,  $J = 7.05$  Hz, 2H), 2.88 (dd,  $J = 16.36, 6.11$  Hz, 1H), 2.58 (dd,  $J = 16.32, 6.74$  Hz, 1H), 2.36 – 2.16 (m, 2H), 1.29 (t,  $J = 7.14$  Hz, 3H).  $^{13}\text{C}$  NMR (101 MHz, Chloroform-*d*)  $\delta$  172.0, 136.0 (t,  $J = 4.38$  Hz), 133.8, 128.7, 128.4, 127.2, 126.8, 124.1 (dd,  $J = 244.31, 241.81$  Hz), 61.1, 42.7 (dd,  $J = 26.82, 22.80$  Hz), 37.4 (t,  $J = 5.10$  Hz), 29.0 (t,  $J = 24.34$  Hz), 26.8 (dd,  $J = 6.55, 4.89$  Hz), 14.3.  $^{19}\text{F}$  NMR (377 MHz, Chloroform-*d*)  $\delta$  -97.4 (d,  $J = 238.76$  Hz), -104.0 (d,  $J = 238.76$  Hz). HRMS-ESI: Found  $[\text{M}+\text{Na}]^+ = 277.1015$ ;  $\text{C}_{14}\text{H}_{16}\text{F}_2\text{O}_2\text{Na}$  requires 277.1011.

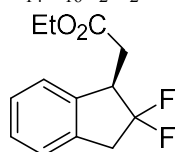

**Ethyl (R)-2-(2,2-difluoro-2,3-dihydro-1H-inden-1-yl)acetate (2o)**

Colorless oil.  $^1\text{H}$  NMR (400 MHz, Chloroform-*d*)  $\delta$  7.24 – 6.91 (m, 4H), 4.23 (q,  $J = 7.13$  Hz, 2H), 4.06 – 3.92 (m, 1H), 3.41 (dd,  $J = 15.57, 12.61$  Hz, 2H), 2.86 (dd,  $J = 16.46, 6.36$  Hz, 1H), 2.61 (ddd,  $J = 16.54, 7.83, 1.25$  Hz, 1H), 1.30 (t,  $J = 7.12$  Hz, 3H).  $^{13}\text{C}$  NMR (101 MHz, Chloroform-*d*)  $\delta$  171.7, 140.8 (dd,  $J = 5.08, 1.82$  Hz), 136.6 (t,  $J = 4.71$  Hz), 133.5, 128.1, 127.9, 124.9, 124.2, 61.1, 48.0 (dd,  $J = 27.12, 22.35$  Hz), 41.5 (t,  $J = 26.69$  Hz), 33.8 (dd,  $J = 8.21, 2.23$  Hz), 14.3.  $^{19}\text{F}$  NMR (377 MHz, Chloroform-*d*)  $\delta$  -97.3 (d,  $J = 229.32$  Hz), -106.8 (d,  $J = 228.93$  Hz). HRMS-ESI: Found  $[\text{M}+\text{Na}]^+ = 263.0864$ ;  $\text{C}_{13}\text{H}_{14}\text{F}_2\text{O}_2\text{Na}$  requires 263.0854.

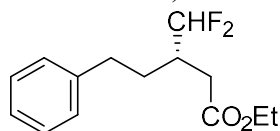

**Ethyl (S)-3-(difluoromethyl)-5-phenylpentanoate (2p)**

Colorless oil.  $^1\text{H}$  NMR (400 MHz, Chloroform-*d*)  $\delta$  7.32-7.13 (m, 5H), 5.88 (td,  $J = 56.6, 3.02$  Hz, 1H), 4.15 (q,  $J = 7.14$  Hz, 2H), 2.70 (t,  $J = 7.97$  Hz, 2H), 2.64-2.29 (m, 3H), 1.98-1.86 (m, 1H), 1.76 – 1.64 (m, 1H), 1.26 (t,  $J = 7.14$  Hz).  $^{13}\text{C}$  NMR (101 MHz, Chloroform-*d*)  $\delta$  171.4, 140.9, 128.3, 128.1, 125.9, 117.4 (t,  $J = 242.5$  Hz), 60.7, 38.8 (t,  $J = 19.8$  Hz), 32.9, 29.7 (t,  $J = 4.00$  Hz), 32.6 (t,  $J = 4.87$  Hz), 14.2. HRMS-ESI: Found  $[\text{M}+\text{Na}]^+ = 279.1169$ ;  $\text{C}_{14}\text{H}_{18}\text{F}_2\text{O}_2\text{Na}$  requires 279.1167.

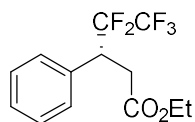

**Ethyl (*R*)-4,4,5,5,5-pentafluoro-3-phenylpentanoate (2q)**

Colorless oil.  $^1\text{H}$  NMR (400 MHz, Chloroform-*d*)  $\delta$  7.40 – 7.27 (m, 5H), 4.14 – 3.79 (m, 3H), 3.09 (dd,  $J = 16.11, 4.64$  Hz, 1H), 2.88 (dd,  $J = 16.13, 10.14$  Hz, 1H), 1.10 (t,  $J = 7.13$  Hz, 3H).  $^{13}\text{C}$  NMR (101 MHz, Chloroform-*d*)  $\delta$  170.2, 133.6 (d,  $J = 5.85$  Hz), 129.4, 128.8, 128.7, 122.5 – 109.6 (m,  $\text{CF}_2\text{CF}_3$ , 2C), 61.1, 44.1 (t,  $J = 20.75$  Hz), 34.3, 14.1.  $^{19}\text{F}$  NMR (377 MHz, Chloroform-*d*)  $\delta$  -81.4, -115.2 (d,  $J = 269.84$  Hz), -121.4 (d,  $J = 270.27$  Hz). HRMS-ESI: Found  $[\text{M}+\text{Na}]^+ = 319.0722$ ;  $\text{C}_{13}\text{H}_{13}\text{F}_5\text{O}_2\text{Na}$  requires 319.0728.

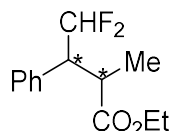

**Ethyl 4,4-difluoro-2-methyl-3-phenylbutanoate (2r)**

Colorless oil.  $^1\text{H}$  NMR (400 MHz, Chloroform-*d*)  $\delta$  7.38 – 7.29 (m, 3H), 7.25 – 7.21 (m, 2H), 5.99 (td,  $J = 56.21, 3.65$  Hz, 1H), 4.21 (qd,  $J = 7.15, 1.05$  Hz, 2H), 3.44 – 3.31 (m, 1H), 2.98 (dq,  $J = 10.54, 7.06$  Hz, 1H), 1.30 (t,  $J = 7.14$  Hz, 3H), 0.99 (d,  $J = 7.03$  Hz, 3H).  $^{13}\text{C}$  NMR (101 MHz, Chloroform-*d*)  $\delta$  175.3, 134.5 (t,  $J = 3.39$  Hz), 129.7, 128.9, 128.1, 116.8 (t,  $J = 244.23$  Hz), 61.0, 52.4 (t,  $J = 19.66$  Hz), 39.4 (t,  $J = 3.74$  Hz), 16.3, 14.3.  $^{19}\text{F}$  NMR (Chloroform-*d*, 376 MHz)  $\delta$  -120.3 (d,  $J = 34.0$  Hz). HRMS-ESI: Found  $[\text{M}+\text{Na}]^+ = 265.1024$ ;  $\text{C}_{13}\text{H}_{16}\text{F}_2\text{O}_2\text{Na}$  requires 265.1011.

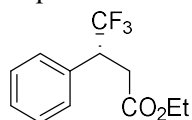

**Ethyl (*R*)-4,4,4-trifluoro-3-phenylbutanoate (2s)**

Colorless oil.  $^1\text{H}$  NMR (400 MHz, Chloroform-*d*)  $\delta$  7.36 (d,  $J = 3.77$  Hz, 5H), 4.16 – 4.00 (m, 2H), 4.01 – 3.88 (m, 1H), 3.05 (dd,  $J = 16.14, 5.13$  Hz, 1H), 2.91 (dd,  $J = 16.16, 9.78$  Hz, 1H), 1.16 (t,  $J = 7.12$  Hz, 3H).  $^{13}\text{C}$  NMR (101 MHz, Chloroform-*d*)  $\delta$  170.1, 133.9 (q,  $J = 1.66$  Hz), 129.1, 128.8, 128.7, 126.5 (q,  $J = 279.74$  Hz), 61.2, 46.3 (q,  $J = 27.76$  Hz), 34.7 (d,  $J = 2.45$  Hz), 14.1.  $^{19}\text{F}$  NMR (377 MHz, Chloroform-*d*)  $\delta$  -70.3. HRMS-ESI: Found  $[\text{M}+\text{Na}]^+ = 269.0772$ ;  $\text{C}_{12}\text{H}_{13}\text{F}_3\text{O}_2\text{Na}$  requires 269.0760.

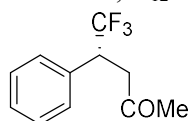

**(*R*)-5,5,5-trifluoro-4-phenylpentan-2-one (2t)**

Colorless oil.  $^1\text{H}$  NMR (400 MHz, Chloroform-*d*)  $\delta$  7.38 – 7.29 (m, 5H), 4.01 (qdd,  $J = 9.66, 8.12, 5.33$  Hz, 1H), 3.16 – 3.00 (m, 2H), 2.12 (s, 3H).  $^1\text{H}$  NMR (400 MHz, Chloroform-*d*)  $\delta$  7.42 – 7.28 (m, 5H), 4.15 – 3.88 (m, 1H), 3.20 – 2.96 (m, 2H), 2.12 (s, 3H).  $^{13}\text{C}$  NMR (126 MHz, Chloroform-*d*)  $\delta$  203.8, 134.5, 129.1, 128.9, 128.5, 126.8 (q,  $J = 279.4$  Hz), 44.7 (q,  $J = 27.6$  Hz), 43.1, 30.5.  $^{19}\text{F}$  NMR (376 MHz, Chloroform-*d*)  $\delta$  -70.0 (d,  $J = 9.6$  Hz). HRMS-ESI: Found  $[\text{M}+\text{Na}]^+ = 239.0658$ ;  $\text{C}_{11}\text{H}_{11}\text{F}_3\text{ONa}$  requires 239.0654.

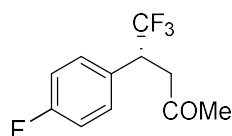

**(*R*)-5,5,5-trifluoro-4-(4-fluorophenyl)pentan-2-one (2u)**

Colorless oil.  $^1\text{H}$  NMR (400 MHz, Chloroform-*d*)  $\delta$  7.34 – 7.22 (m, 2H), 7.14 – 6.98 (m, 2H), 4.00 (ddq,  $J = 9.42, 4.63$  Hz, 1H), 3.15 – 2.97 (m, 2H), 2.12 (s, 3H).  $^{13}\text{C}$  NMR (101 MHz,



Chloroform-*d*)  $\delta$  203.6, 162.8 (d,  $J = 247.33$  Hz), 130.8 (d,  $J = 8.13$  Hz), 130.3, 126.7 (q,  $J = 279.76$  Hz), 115.9 (d,  $J = 21.59$  Hz), 44.0 (q,  $J = 27.88$  Hz), 43.2 (d,  $J = 1.98$  Hz), 30.5.  $^{19}\text{F}$  NMR (377 MHz, Chloroform-*d*)  $\delta$  -70.2, -113.6. HRMS-ESI: Found  $[\text{M}+\text{Na}]^+ = 257.0565$ ;  $\text{C}_{11}\text{H}_{10}\text{F}_4\text{ONa}$  requires 257.0560.

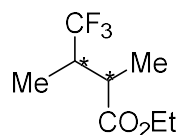

**Ethyl-4,4,4-trifluoro-2,3-dimethylbutanoate (2v)**

Colorless oil.  $^1\text{H}$  NMR (400 MHz, Chloroform-*d*)  $\delta$  4.16 (qd,  $J = 7.1, 1.9$  Hz, 2H), 2.85 – 2.69 (m, 2H), 1.26 (t,  $J = 7.1$  Hz, 3H), 1.20 – 1.16 (m, 3H), 1.10 (d,  $J = 6.9$  Hz, 3H).  $^{13}\text{C}$  NMR (Chloroform-*d*, 101 MHz)  $\delta$  174.5, 133.0 – 122.6 (m), 61.1, 39.4 (q,  $J = 26.2$  Hz), 38.4 (q,  $J = 2.1$  Hz), 14.2, 12.4, 9.1 (q,  $J = 2.9$  Hz).  $^{19}\text{F}$  NMR (Chloroform-*d*, 376 MHz)  $\delta$  -71.2 (s). HRMS-ESI: Found  $[\text{M}+\text{Na}]^+ = 221.0746$ ;  $\text{C}_8\text{H}_{13}\text{F}_3\text{O}_2\text{Na}$  a requires 221.0760.

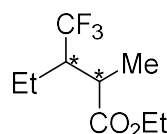

**Ethyl-2-methyl-3-(trifluoromethyl)pentanoate (2w)**

Colourless oil.  $^1\text{H}$  NMR (400 MHz, Chloroform-*d*)  $\delta$  4.15 (qq,  $J = 7.3, 3.7$  Hz, 2H), 2.84 (qd,  $J = 7.1, 4.4$  Hz, 1H), 2.75 – 2.57 (m, 1H), 1.69 – 1.55 (m, 1H), 1.53 – 1.48 (m, 1H), 1.26 (d,  $J = 14.3$  Hz, 3H), 1.18 (dd,  $J = 7.2, 1.0$  Hz, 3H), 0.96 (dd,  $J = 7.5, 1.1$  Hz, 3H).  $^{13}\text{C}$  NMR (Chloroform-*d*, 101 MHz)  $\delta$  174.4, 128.1 (q,  $J = 281.0$  Hz), 61.1, 45.7 (q,  $J = 24.6$  Hz), 37.8 (q,  $J = 2.6$  Hz), 18.0 (q,  $J = 2.3$  Hz), 14.2, 12.0, 11.8.  $^{19}\text{F}$  NMR (Chloroform-*d*, 376 MHz)  $\delta$  -67.8 (s). HRMS-ESI: Found  $[\text{M}+\text{Na}]^+ = 235.0928$ ;  $\text{C}_9\text{H}_{13}\text{F}_3\text{O}_2\text{Na}$  requires 235.0916.

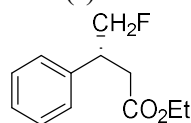

**Ethyl (*R*)-4-fluoro-3-phenylbutanoate (2x)**

Colorless oil.  $^1\text{H}$  NMR (400 MHz, Chloroform-*d*)  $\delta$  7.37 – 7.30 (m, 2H), 7.29 – 7.19 (m, 3H), 4.69 – 4.42 (m, 2H), 4.08 (qd,  $J = 7.13, 1.78$  Hz, 2H), 3.62 – 3.46 (m, 1H), 2.88 (dd,  $J = 15.85, 6.87$  Hz, 1H), 2.70 (dd,  $J = 15.49, 8.49$  Hz, 1H), 1.17 (t,  $J = 7.14$  Hz, 3H).  $^{13}\text{C}$  NMR (101 MHz, Chloroform-*d*)  $\delta$  171.8, 139.6 (d,  $J = 5.50$  Hz), 128.8, 127.9, 127.5, 86.2 (d,  $J = 173.94$  Hz), 60.7, 42.7 (d,  $J = 19.04$  Hz), 36.7 (d,  $J = 4.97$  Hz), 14.2.  $^{19}\text{F}$  NMR (377 MHz, Chloroform-*d*)  $\delta$  17.3. HRMS-ESI: Found  $[\text{M}+\text{Na}]^+ = 233.0933$ ;  $\text{C}_{12}\text{H}_{15}\text{FO}_2\text{Na}$  requires 233.0948.

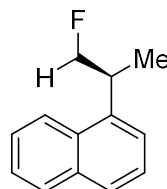

**(*S*)-1-(1-fluoropropan-2-yl)naphthalene (4a)**

Colorless oil.  $^1\text{H}$  NMR (400 MHz, Chloroform-*d*)  $\delta$  8.16 – 8.09 (m, 1H), 7.92 – 7.86 (m, 1H), 7.80 – 7.73 (m, 1H), 7.61 – 7.39 (m, 4H), 4.72 (ddd,  $J = 47.35, 8.83, 5.20$  Hz, 1H), 4.54 (ddd,  $J = 47.50, 8.83, 7.59$  Hz, 1H), 4.63 – 4.44 (m, 1H), 1.53 (dd,  $J = 6.89, 1.12$  Hz, 3H).  $^{13}\text{C}$  NMR (101 MHz, Chloroform-*d*)  $\delta$  138.1 (d,  $J = 7.05$  Hz), 134.1, 131.7, 129.2, 127.5, 126.3, 125.7, 125.7, 123.6 (d,  $J = 0.82$  Hz), 122.9, 88.0 (d,  $J = 173.43$  Hz), 34.9 (d,  $J = 19.54$  Hz), 17.4 (d,  $J = 4.39$  Hz).  $^{19}\text{F}$  NMR (377 MHz, Chloroform-*d*)  $\delta$  -216.4. HRMS-ESI: Found  $[\text{M}+\text{Na}]^+ = 211.0906$ ;  $\text{C}_{13}\text{H}_{13}\text{FNa}$  requires 211.0893.

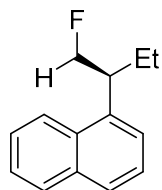

**(S)-1-(1-fluorobutan-2-yl)naphthalene (4b)**

Colorless oil.  $^1\text{H}$  NMR (400 MHz, Chloroform-*d*)  $\delta$  8.16 – 8.10 (m, 1H), 7.92 – 7.85 (m, 1H), 7.83 – 7.74 (m, 1H), 7.59 – 7.38 (m, 4H), 4.71 (ddd,  $J = 15.32, 5.56, 5.08$  Hz, 1H), 4.60 (ddd,  $J = 15.52, 5.29, 5.07$  Hz, 1H), 3.90 – 3.74 (m, 1H), 2.16 – 2.03 (m, 1H), 1.98 – 1.82 (m, 1H), 0.94 (t,  $J = 7.43$  Hz, 3H).  $^{13}\text{C}$  NMR (101 MHz, Chloroform-*d*)  $\delta$  136.9 (d,  $J = 6.36$  Hz), 134.2, 132.4, 129.2, 127.4, 126.2, 125.6, 125.6, 124.1, 123.0, 86.9 (d,  $J = 172.95$  Hz), 41.9 (d,  $J = 18.84$  Hz), 24.8 (d,  $J = 4.08$  Hz), 12.0.  $^{19}\text{F}$  NMR (377 MHz, Chloroform-*d*)  $\delta$  -217.5. HRMS-ESI: Found  $[\text{M}+\text{Na}]^+ = 225.1063$ ;  $\text{C}_{14}\text{H}_{15}\text{FNa}$  requires 225.1050.

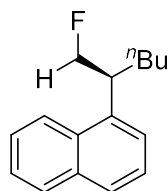

**(S)-1-(1-fluorohexan-2-yl)naphthalene (4c)**

Colorless oil.  $^1\text{H}$  NMR (400 MHz, Chloroform-*d*)  $\delta$  8.18 – 8.11 (m, 1H), 7.93 – 7.88 (m, 1H), 7.81 – 7.77 (m, 1H), 7.60 – 7.41 (m, 4H), 4.71 (ddd,  $J = 28.70, 9.23, 5.53$  Hz, 1H), 4.59 (ddd,  $J = 31.83, 9.42, 5.77$  Hz, 1H), 3.99 – 3.83 (m, 1H), 2.66 – 2.59 (m, 1H), 2.13 – 2.00 (m, 1H), 1.95 – 1.82 (m, 1H), 1.41 – 1.28 (m, 2H), 0.87 (t,  $J = 7.03$  Hz, 2H).  $^{19}\text{F}$  NMR (377 MHz, Chloroform-*d*)  $\delta$  -216.9. HRMS-ESI: Found  $[\text{M}+\text{Na}]^+ = 253.1380$ ;  $\text{C}_{16}\text{H}_{19}\text{FNa}$  requires 253.1363.

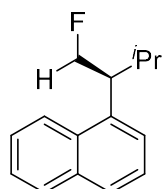

**(S)-1-(1-fluoro-3-methylbutan-2-yl)naphthalene (4d)**

Colorless oil.  $^1\text{H}$  NMR (400 MHz, Chloroform-*d*)  $\delta$  8.10 (d,  $J = 8.26$  Hz, 1H), 7.87 (dd,  $J = 7.67, 1.77$  Hz, 1H), 7.76 (d,  $J = 8.02$  Hz, 1H), 7.56 – 7.39 (m, 4H), 4.92 – 4.66 (m, 2H), 3.71 – 3.52 (m, 1H), 2.35 – 2.20 (m, 1H), 1.14 (d,  $J = 6.64$  Hz, 3H), 0.85 (d,  $J = 6.74$  Hz, 3H).  $^{19}\text{F}$  NMR (377 MHz, Chloroform-*d*)  $\delta$  -221.5. HRMS-ESI: Found  $[\text{M}+\text{Na}]^+ = 239.1215$ ;  $\text{C}_{15}\text{H}_{17}\text{FNa}$  requires 239.1206.

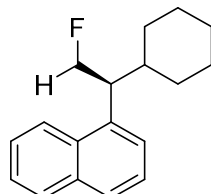

**(S)-1-(1-cyclohexyl-2-fluoroethyl)naphthalene (4e)**

Colorless oil.  $^1\text{H}$  NMR (400 MHz, Chloroform-*d*)  $\delta$  8.12 (d,  $J = 8.28$  Hz, 1H), 7.90 – 7.82 (m, 1H), 7.81 – 7.75 (m, 1H), 7.61 – 7.40 (m, 4H), 4.95 – 4.68 (m, 2H), 3.74 – 3.59 (m, 1H), 2.13 – 2.05 (m, 1H), 2.02 – 0.83 (m, 10H). HRMS-ESI: Found  $[\text{M}+\text{Na}]^+ = 279.1526$ ;  $\text{C}_{18}\text{H}_{21}\text{FNa}$  requires 279.1519.

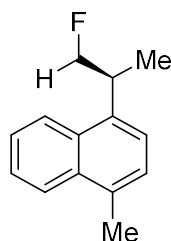

**(S)-1-(1-fluoropropan-2-yl)-4-methylnaphthalene (4f)**

Colorless oil.  $^1\text{H}$  NMR (400 MHz, Chloroform-*d*)  $\delta$  8.22 – 8.12 (m, 1H), 8.12 – 8.01 (m, 1H), 7.63 – 7.49 (m, 2H), 7.33 (s, 2H), 4.72 (ddd,  $J = 47.44, 8.86, 5.20$  Hz, 1H), 4.52 (ddd,  $J = 47.52, 8.84, 7.70$  Hz, 1H), 4.11 – 3.94 (m, 1H), 2.70 (s, 3H), 1.53 (dd,  $J = 6.87, 1.11$  Hz, 3H).  $^{13}\text{C}$  NMR (101 MHz, Chloroform-*d*)  $\delta$  136.1 (d,  $J = 7.16$  Hz), 133.5, 133.2, 131.7, 126.5, 126.0, 125.6, 125.2, 123.4, 123.3, 88.1 (d,  $J = 173.32$  Hz), 34.7 (d,  $J = 19.40$  Hz), 19.7, 17.4 (d,  $J = 4.26$  Hz).  $^{19}\text{F}$  NMR (377 MHz, Chloroform-*d*)  $\delta$  -216.1. HRMS-ESI: Found  $[\text{M}+\text{Na}]^+ = 225.1057$ ;  $\text{C}_{14}\text{H}_{15}\text{FNa}$  requires 225.1050.

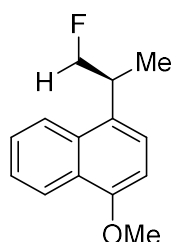

**(S)-1-(1-fluoropropan-2-yl)-4-methoxynaphthalene (4g)**

Colorless oil.  $^1\text{H}$  NMR (400 MHz, Chloroform-*d*)  $\delta$  8.37 – 8.31 (m, 1H), 8.12 – 7.97 (m, 1H), 7.60 – 7.53 (m, 1H), 7.52 – 7.46 (m, 1H), 7.32 (d,  $J = 8.02$  Hz, 1H), 6.80 (d,  $J = 8.05$  Hz, 1H), 4.68 (ddd,  $J = 47.52, 8.81, 5.07$  Hz, 1H), 4.47 (ddd,  $J = 47.62, 8.83, 7.75$  Hz, 1H), 3.97 – 3.83 (m, 4H), 1.50 (dd,  $J = 6.85, 1.12$  Hz, 3H).  $^{13}\text{C}$  NMR (101 MHz, Chloroform-*d*)  $\delta$  154.6, 132.6, 129.7 (d,  $J = 7.30$  Hz), 126.8, 126.1, 125.1, 123.6 (d,  $J = 1.18$  Hz), 123.0, 122.7, 103.5, 88.1 (d,  $J = 173.37$  Hz), 55.6, 34.5 (d,  $J = 19.45$  Hz), 17.4 (d,  $J = 4.13$  Hz).  $^{19}\text{F}$  NMR (377 MHz, Chloroform-*d*)  $\delta$  -215.9. HRMS-ESI: Found  $[\text{M}+\text{Na}]^+ = 241.1012$ ;  $\text{C}_{14}\text{H}_{15}\text{FONa}$  requires 241.0999.

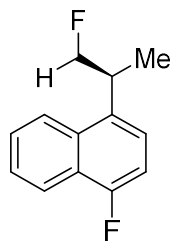

**(S)-1-fluoro-4-(1-fluoropropan-2-yl)naphthalene (4h)**

Colorless oil.  $^1\text{H}$  NMR (400 MHz, Chloroform-*d*)  $\delta$  8.21 – 8.05 (m, 2H), 7.64 – 7.53 (m, 2H), 7.34 (dd,  $J = 8.08, 5.35$  Hz, 1H), 7.13 (dd,  $J = 10.19, 8.06$  Hz, 1H), 4.68 (ddd,  $J = 47.40, 8.89, 5.34$  Hz, 1H), 4.51 (ddd,  $J = 47.44, 8.90, 7.34$  Hz, 1H), 4.04 – 3.87 (m, 1H), 1.50 (dd,  $J = 6.93, 1.17$  Hz, 3H).  $^{13}\text{C}$  NMR (101 MHz, Chloroform-*d*)  $\delta$  159.3, 133.0 (d,  $J = 3.14$  Hz), 127.3, 126.0 (d,  $J = 2.00$  Hz), 124.3, 123.4 (d,  $J = 1.01$  Hz), 123.4 – 123.2 (m), 123.0 (d,  $J = 2.81$  Hz), 121.6 (d,  $J = 6.13$  Hz), 109.1 (d,  $J = 19.75$  Hz), 87.9 (d,  $J = 174.01$  Hz), 34.7 (d,  $J = 19.61$  Hz), 17.4 (d,  $J = 4.55$  Hz).  $^{19}\text{F}$  NMR (377 MHz, Chloroform-*d*)  $\delta$  -124.7, -216.5. HRMS-ESI: Found  $[\text{M}+\text{Na}]^+ = 229.0787$ ;  $\text{C}_{13}\text{H}_{12}\text{F}_2\text{Na}$  requires 229.0799.

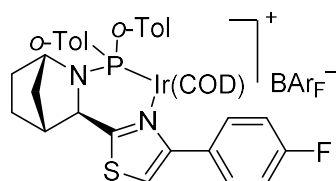

### Catalyst G

Orange solid.  $^1\text{H}$  NMR (400 MHz, Chloroform-*d*)  $\delta$  7.75 – 7.68 (m, 8H), 7.51 (s, 4H), 7.48 – 7.40 (m, 4H), 7.36 – 7.29 (m, 1H), 7.25 – 7.17 (m, 3H), 7.07 (t,  $J$  = 7.64 Hz, 1H), 6.96 – 6.88 (m, 2H), 6.88 – 6.81 (m, 2H), 6.61 (ddd,  $J$  = 9.34, 7.92, 1.32 Hz, 1H), 5.04 – 4.97 (m, 1H), 4.73 (d,  $J$  = 1.70 Hz, 1H), 4.75 – 4.63 (m, 1H), 3.64 – 3.60 (m, 1H), 3.58 – 3.51 (m, 1H), 3.23 (s, 3H), 3.11 – 3.05 (m, 1H), 2.75 (p,  $J$  = 7.34 Hz, 1H), 2.31 – 2.26 (m, 1H), 2.23 (s, 3H), 2.19 – 2.13 (m, 1H), 2.02 (d,  $J$  = 10.80 Hz, 1H), 1.92 – 1.85 (m, 2H), 1.82 – 1.77 (m, 2H), 1.73 – 1.67 (m, 1H), 1.48 – 1.38 (m, 1H), 1.09 – 1.02 (m, 1H), 1.02 – 0.93 (m, 1H), 0.87 – 0.80 (m, 2H).  $^{13}\text{C}$  NMR (101 MHz, Chloroform-*d*)  $\delta$  172.2 (d,  $J$  = 1.74 Hz), 162.6, 162.1, 161.6, 161.1, 156.7, 141.8 (d,  $J$  = 13.63 Hz), 139.6 (d,  $J$  = 15.68 Hz), 135.0, 132.8 – 132.4 (m), 131.5, 129.6 – 128.4 (m), 127.7 (d,  $J$  = 7.38 Hz), 126.7 (d,  $J$  = 9.21 Hz), 126.0, 125.2, 124.6, 123.3, 120.6, 117.8 – 117.4 (m), 116.8, 116.2 (d,  $J$  = 21.78 Hz), 90.8 (d,  $J$  = 7.77 Hz), 78.5, 78.3, 75.7, 67.1 (d,  $J$  = 9.62 Hz), 65.0, 60.2, 42.5, 38.9, 36.8, 34.7, 29.9 (d,  $J$  = 12.85 Hz), 29.2, 28.0, 24.7 (d,  $J$  = 5.94 Hz), 24.5, 21.8 (d,  $J$  = 8.42 Hz).  $^{31}\text{P}$  NMR (162 MHz, Chloroform-*d*)  $\delta$  49.40.  $^{19}\text{F}$  NMR (377 MHz, Chloroform-*d*)  $\delta$  -62.4, -108.6. HRMS-ESI: Found  $[\text{M-BArF}]^+$  = 787.2280;  $\text{C}_{37}\text{H}_{40}\text{IrFN}_2\text{PS}$  requires 787.2258.  $[\alpha]_{\text{D}}^{25.0} = +21$  ( $C = 0.10$  in  $\text{CHCl}_3$ ).

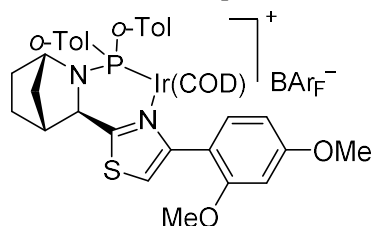

### Catalyst H

Orange solid.  $^1\text{H}$  NMR (400 MHz, Chloroform-*d*)  $\delta$  7.75 – 7.67 (m, 8H), 7.52 (s, 4H), 7.46 – 7.39 (m, 4H), 7.36 – 7.30 (m, 1H), 7.25 – 7.18 (m, 2H), 7.09 (t,  $J$  = 7.51 Hz, 1H), 6.71 – 6.61 (m, 1H), 6.48 (d,  $J$  = 2.27 Hz, 1H), 6.07 (dd,  $J$  = 8.46, 2.30 Hz, 1H), 5.96 (d,  $J$  = 8.37 Hz, 1H), 5.05 – 4.87 (m, 1H), 4.74 – 4.65 (m, 2H), 3.80 (s, 3H), 3.77 (s, 3H), 3.63 (s, 1H), 3.60 – 3.49 (m, 1H), 3.26 (s, 3H), 3.15 – 3.11 (m, 1H), 2.88 – 2.76 (m, 1H), 2.41 – 2.23 (m, 1H), 2.19 (s, 3H), 2.10 – 2.02 (m, 1H), 1.99 – 1.80 (m, 1H), 1.69 – 1.59 (m, 3H), 1.44 – 1.31 (m, 2H), 1.23 – 1.05 (m, 3H), 1.01 – 0.80 (m, 2H).  $^{13}\text{C}$  NMR (101 MHz, Chloroform-*d*)  $\delta$  169.5, 162.7, 162.6, 162.1, 161.6, 161.1, 157.3, 152.9, 142.0, 139.7 (d,  $J$  = 15.61 Hz), 134.9, 132.9, 132.7 – 132.2 (m), 131.4 – 131.2 (m), 129.5, 129.3 – 129.1 (m), 129.0 – 128.7 (m), 128.7 – 128.4 (m), 127.6 (d,  $J$  = 7.38 Hz), 126.6 (d,  $J$  = 9.02 Hz), 126.0, 125.6, 125.0, 123.3, 120.6, 118.1, 117.8 – 117.4 (m), 114.8, 105.0, 98.4, 89.6 (d,  $J$  = 7.09 Hz), 75.7, 66.9 (d,  $J$  = 9.88 Hz), 64.6, 60.1 (d,  $J$  = 4.93 Hz), 55.8 (d,  $J$  = 4.29 Hz), 42.5 (d,  $J$  = 6.04 Hz), 39.0, 36.6 (d,  $J$  = 4.11 Hz), 34.9, 30.0, 29.3, 28.1, 26.8, 24.5 (d,  $J$  = 6.11 Hz), 21.8 (d,  $J$  = 8.50 Hz).  $^{31}\text{P}$  NMR (162 MHz, Chloroform-*d*)  $\delta$  48.95.  $^{19}\text{F}$  NMR (377 MHz, Chloroform-*d*)  $\delta$  -62.4. HRMS-ESI: Found  $[\text{M-BArF}]^+$  = 829.2586;  $\text{C}_{39}\text{H}_{45}\text{IrN}_2\text{O}_2\text{PS}$  requires 829.2563.  $[\alpha]_{\text{D}}^{25.0} = +19$  ( $C = 0.10$  in  $\text{CHCl}_3$ ).

## 6. General procedure for further transformation

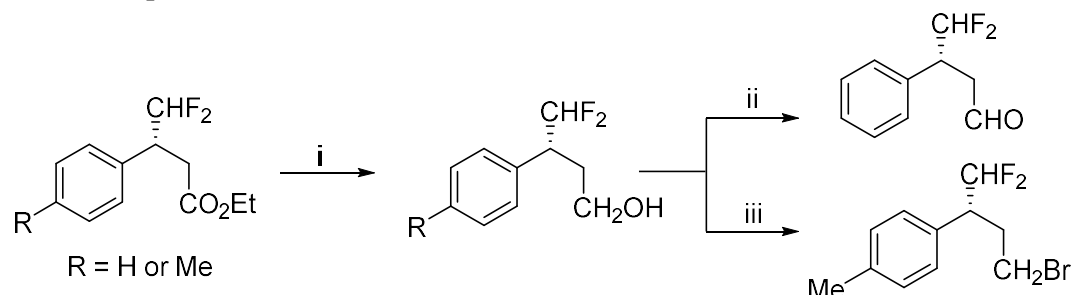

Procedure i: The corresponding ester (1.0 mmol) was dissolved in dry THF in dry glassware.  $\text{LiAlH}_4$  (1.5 equiv.) was added slowly at 0 °C and stirred at room temperature for 1 hour. At 0 °C, x mL  $\text{H}_2\text{O}$  was added to the mixture, then x mL 10%  $\text{NaOH}$ , 3 x mL  $\text{H}_2\text{O}$  was added to quench the reaction (x is the mass of  $\text{LiAlH}_4$ , gram). The mixture was filtered through celite. The filtrate was concentrated under reduced pressure and the product was purified by column chromatography.

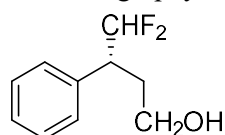

### (*R*)-4,4-difluoro-3-phenylbutan-1-ol (7)

Colorless oil.  $^1\text{H}$  NMR (400 MHz, Chloroform-*d*)  $\delta$  7.42 – 7.21 (m, 5H), 5.91 (td,  $J = 56.61$ , 3.72 Hz, 1H), 3.72 – 3.62 (m, 1H), 3.53 – 3.43 (m, 1H), 3.35 – 3.18 (m, 1H), 2.30 – 2.14 (m, 1H), 2.09 – 1.92 (m, 1H).  $^{13}\text{C}$  NMR (101 MHz, Chloroform-*d*)  $\delta$  136.6 (dd,  $J = 5.29$ , 3.17 Hz), 129.0, 128.9, 127.9, 118.0 (t,  $J = 244.37$  Hz), 60.0, 46.5 (t,  $J = 19.96$  Hz), 32.5 – 29.8 (m).  $^{19}\text{F}$  NMR (377 MHz, Chloroform-*d*)  $\delta$  -118.5 (d,  $J = 276.71$  Hz), -122.5 (d,  $J = 276.50$  Hz). HRMS-ESI: Found  $[\text{M}+\text{Na}]^+ = 209.0756$ ;  $\text{C}_{10}\text{H}_{12}\text{F}_2\text{ONa}$  requires 209.0748.

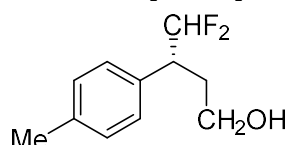

### (*R*)-4,4-difluoro-3-(*p*-tolyl)butan-1-ol (16)

Colorless oil.  $^1\text{H}$  NMR (400 MHz, Chloroform-*d*)  $\delta$  7.22 – 7.12 (m, 4H), 5.87 (td,  $J = 56.71$ , 3.76 Hz, 1H), 3.74 – 3.61 (m, 1H), 3.51 – 3.44 (m, 1H), 3.30 – 3.11 (m, 1H), 2.34 (s, 3H), 2.23 – 2.11 (m, 1H), 2.03 – 1.89 (m, 1H).  $^{13}\text{C}$  NMR (101 MHz, Chloroform-*d*)  $\delta$  137.6, 133.4 (dd,  $J = 5.03$ , 3.39 Hz), 129.6, 128.9, 118.1 (t,  $J = 244.27$  Hz), 60.1, 46.1 (t,  $J = 19.92$  Hz), 31.3 (t,  $J = 3.91$  Hz), 21.2.  $^{19}\text{F}$  NMR (377 MHz, Chloroform-*d*)  $\delta$  -118.5 (d,  $J = 276.39$  Hz), -122.6 (d,  $J = 276.13$  Hz). HRMS-ESI: Found  $[\text{M}+\text{Na}]^+ = 223.0908$ ;  $\text{C}_{11}\text{H}_{14}\text{F}_2\text{ONa}$  requires 223.0905.

Procedure ii: The corresponding alcohol (1 equiv.) was dissolved in the dry DCM, and DMP (1.2 equiv.) was added in the solution. After complete consumption of the starting material, the mixture was filtered and the filtrate was concentrated under vacuo. The crude was purified by column chromatography to obtain the aldehyde.

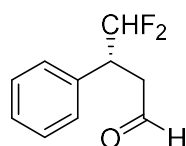

### (*R*)-4,4-difluoro-3-phenylbutanal (8)

Colorless oil.  $^1\text{H}$  NMR (400 MHz, Chloroform-*d*)  $\delta$  9.74 (p,  $J = 1.11$  Hz, 1H), 7.39 – 7.27 (m, 5H), 5.93 (td,  $J = 56.38, 3.23$  Hz, 1H), 3.81 – 3.62 (m, 1H), 3.10 (ddd,  $J = 18.07, 5.64, 1.10$  Hz, 1H), 2.97 (ddd,  $J = 18.06, 8.38, 1.49$  Hz, 1H).  $^{13}\text{C}$  NMR (101 MHz, Chloroform-*d*)  $\delta$  199.1, 135.8 (dd,  $J = 5.83, 2.52$  Hz), 129.1, 128.9, 128.3, 117.1 (t,  $J = 245.01$  Hz), 43.7 (t,  $J = 20.48$  Hz), 42.6 (dd,  $J = 4.41, 3.13$  Hz).  $^{19}\text{F}$  NMR (377 MHz, Chloroform-*d*)  $\delta$  -118.6 (d,  $J = 277.92$  Hz), -123.5 (d,  $J = 277.89$  Hz). HRMS-ESI: Found  $[\text{M}+\text{Na}]^+ = 207.0599$ ;  $\text{C}_{10}\text{H}_{10}\text{F}_2\text{ONa}$  requires 207.0592.

Procedure iii: To a solution of  $\text{CBr}_4$  (1.05 equiv.) in dry DCM was added corresponding alcohol (1 equiv.) and  $\text{PPh}_3$  (1.05 equiv.) at 0 °C. The solution was warmed to room temperature for 3h, the reaction mixture was evaporated. The crude was purified by column chromatography on silica gel to give the bromide.

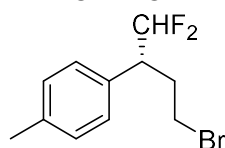

**(R)-1-(4-bromo-1,1-difluorobutan-2-yl)-4-methylbenzene (17)**

Colorless oil.  $^1\text{H}$  NMR (400 MHz, Chloroform-*d*)  $\delta$  7.23 – 7.12 (m, 4H), 5.87 (td,  $J = 56.47, 3.60$  Hz, 1H), 3.42 (ddd,  $J = 10.55, 6.41, 4.64$  Hz, 1H), 3.36 – 3.23 (m, 1H), 3.11 (td,  $J = 9.85, 5.82$  Hz, 1H), 2.48 – 2.21 (m, 5H).  $^{13}\text{C}$  NMR (101 MHz, Chloroform-*d*)  $\delta$  138.0, 132.2 (dd,  $J = 5.65, 2.87$  Hz), 129.8, 128.9, 117.7 (t,  $J = 244.86$  Hz), 47.9 (t,  $J = 20.06$  Hz), 31.3 (dd,  $J = 5.09, 3.48$  Hz), 30.8, 21.2.  $^{19}\text{F}$  NMR (377 MHz, Chloroform-*d*)  $\delta$  -117.9 (d,  $J = 277.43$  Hz), -122.9 (d,  $J = 277.43$  Hz). HRMS-ESI: Found  $[\text{M}+\text{Na}]^+ = 285.0068$ ;  $\text{C}_{11}\text{H}_{13}\text{F}_2\text{BrONa}$  requires 285.0061 ( $\text{Br}^{79}$ ).

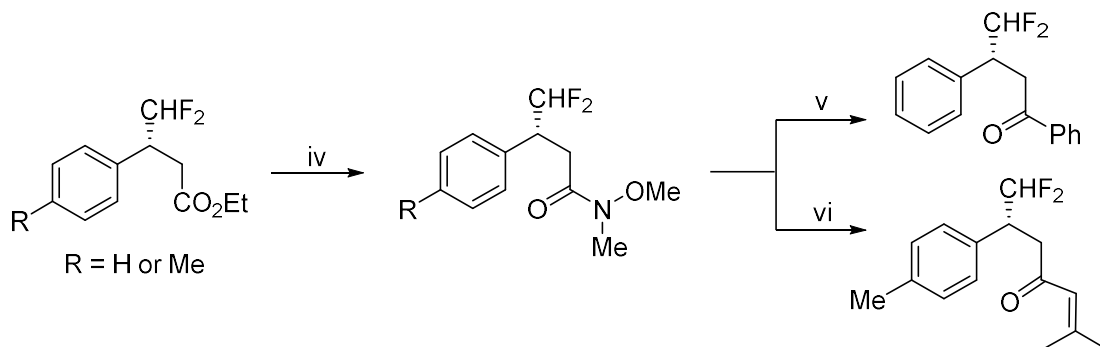

Procedure iv:

A solution of corresponding ester (1 equiv.) and  $\text{HN}(\text{OMe})\text{MeHCl}$  (2 equiv.) in THF was cooled to -5 °C. Isopropyl magnesium chloride (4 equiv.) was added dropwise over 30 minutes. The reaction mixture was stirred at room temperature for 1h, which monitored by TLC. Upon completion the reaction was quenched with saturated ammonium chloride solution, which was then extracted with ether. The organic layers were combined, washed with brine, dried over  $\text{Na}_2\text{SO}_4$ , filtered and concentrated to give the corresponding Weinreb amide, which was purified by column chromatography on silica gel.

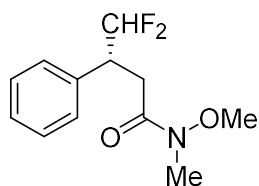

**(R)-4,4-difluoro-N-methoxy-N-methyl-3-phenylbutanamide (9)**

Colorless oil.  $^1\text{H}$  NMR (400 MHz, Chloroform-*d*)  $\delta$  7.40 – 7.27 (m, 5H), 6.01 (td,  $J = 56.59$ , 3.08 Hz, 1H), 3.87 – 3.68 (m, 1H), 3.64 (s, 3H), 3.13 (s, 3H), 3.02 (td,  $J = 14.76$ , 12.84, 7.10 Hz, 2H).  $^{13}\text{C}$  NMR (101 MHz, Chloroform-*d*)  $\delta$  171.5, 136.6, 129.1, 128.8, 127.9, 117.4 (t,  $J = 244.26$  Hz), 61.4, 45.2 (t,  $J = 20.10$  Hz), 32.3, 31.2.  $^{19}\text{F}$  NMR (377 MHz, Chloroform-*d*)  $\delta$  -120.5 (d,  $J = 277.73$  Hz), -122.7 (d,  $J = 277.88$  Hz). HRMS-ESI: Found  $[\text{M}+\text{Na}]^+ = 266.0970$ ;  $\text{C}_{12}\text{H}_{15}\text{F}_2\text{NO}_2\text{Na}$  requires 266.0963.

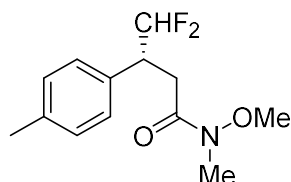

**(*R*)-4,4-difluoro-N-methoxy-N-methyl-3-(*p*-tolyl)butanamide (14)**

Colorless oil.  $^1\text{H}$  NMR (400 MHz, Chloroform-*d*)  $\delta$  7.23 – 7.18 (m, 2H), 7.17 – 7.12 (m, 2H), 5.98 (td,  $J = 56.67$ , 3.11 Hz, 1H), 3.80 – 3.64 (m, 1H), 3.65 (s, 3H), 3.13 (s, 3H), 2.98 (qd,  $J = 16.69$ , 7.11 Hz, 2H), 2.33 (s, 3H).  $^{13}\text{C}$  NMR (101 MHz, Chloroform-*d*)  $\delta$  171.7, 137.6, 133.6 (dd,  $J = 5.40$ , 2.46 Hz), 129.5, 128.9, 117.5 (t,  $J = 244.23$  Hz), 61.4, 44.8 (t,  $J = 20.07$  Hz), 32.3, 31.2, 21.2.  $^{19}\text{F}$  NMR (377 MHz, Chloroform-*d*)  $\delta$  -120.4 (d,  $J = 277.15$  Hz), -122.7 (d,  $J = 277.32$  Hz). HRMS-ESI: Found  $[\text{M}+\text{Na}]^+ = 280.1121$ ;  $\text{C}_{13}\text{H}_{17}\text{F}_2\text{NO}_2\text{Na}$  requires 280.1120.

Procedure v:

Grignard solution (1.5 equiv.) was slowly added to the stirring solution of the corresponding Weinreb amide (1 equiv.) in THF at  $-30$  °C. The reaction mixture was then stirred at room temperature for 1h and then quenched with a saturated aqueous  $\text{NH}_4\text{Cl}$  solution. The aqueous phase was extracted with  $\text{Et}_2\text{O}$  and combined organic layer were washed with brine, dried over  $\text{Na}_2\text{SO}_4$ . The solvent was evaporated and the resulting crude was purified by a short column chromatography to yield pure of ketone.

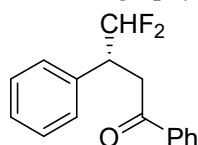

**(*R*)-4,4-difluoro-1,3-diphenylbutan-1-one (10)**

Colorless oil.  $^1\text{H}$  NMR (400 MHz, Chloroform-*d*)  $\delta$  7.99 – 7.91 (m, 2H), 7.61 – 7.53 (m, 1H), 7.50 – 7.42 (m, 2H), 7.38 – 7.26 (m, 5H), 6.04 (td,  $J = 56.63$ , 2.95 Hz, 1H), 4.02 – 3.85 (m, 1H), 3.66 – 3.48 (m, 2H).  $^{13}\text{C}$  NMR (101 MHz, Chloroform-*d*)  $\delta$  196.9, 136.7, 136.6 (dd,  $J = 5.61$ , 1.94 Hz), 133.5, 129.1, 128.9, 128.8, 128.2, 127.9, 117.4 (t,  $J = 244.60$  Hz), 44.7 (t,  $J = 20.04$  Hz), 37.5 (dd,  $J = 4.50$ , 2.89 Hz).  $^{19}\text{F}$  NMR (377 MHz, Chloroform-*d*)  $\delta$  -119.7 (d,  $J = 277.81$  Hz), -122.8 (d,  $J = 277.29$  Hz). HRMS-ESI: Found  $[\text{M}+\text{Na}]^+ = 283.0911$ ;  $\text{C}_{16}\text{H}_{14}\text{F}_2\text{ONa}$  requires 283.0905.

Procedure vi:

To a solution of 1-bromo-2-methylprop-1-ene (1 equiv.) in dry THF was added  $n\text{BuLi}$  (1 equiv.) slowly at  $-78$  °C. The solution was stirring for 1h at the same temperature, then was slowly added to the stirring solution of the corresponding Weinreb amide. The solution was warmed to  $0$  °C and stirred until the reaction completed. quenched with a saturated aqueous  $\text{NH}_4\text{Cl}$  solution. The aqueous phase was extracted with  $\text{Et}_2\text{O}$  and combined organic layer were washed

with brine, dried over Na<sub>2</sub>SO<sub>4</sub>. The solvent was evaporated and the resulting crude was purified by column chromatography to yield pure of ketone.

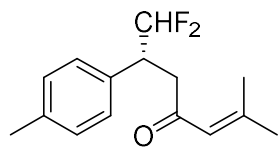

**(R)-7,7-difluoro-2-methyl-6-(p-tolyl)hept-2-en-4-one (15)**

Colorless oil. <sup>1</sup>H NMR (400 MHz, Chloroform-*d*) δ 7.21 – 7.06 (m, 4H), 6.11 – 5.72 (m, 2H), 3.78 – 3.61 (m, 1H), 3.04 (dd, *J* = 17.38, 5.73 Hz, 1H), 2.89 (dd, *J* = 17.35, 8.07 Hz, 1H), 2.32 (s, 3H), 2.09 (d, *J* = 1.22 Hz, 3H), 1.86 (d, *J* = 1.34 Hz, 3H). <sup>13</sup>C NMR (101 MHz, Chloroform-*d*) δ 197.2, 156.6, 137.4, 133.7 (dd, *J* = 5.20, 2.52 Hz), 129.5, 128.9, 123.7, 117.5 (t, *J* = 244.24 Hz), 44.3 (t, *J* = 20.10 Hz), 42.8 (dd, *J* = 4.37, 2.88 Hz), 27.8, 21.2, 21.0. <sup>19</sup>F NMR (377 MHz, Chloroform-*d*) δ -120.2 (d, *J* = 276.41 Hz), -122.5 (d, *J* = 276.52 Hz). HRMS-ESI: Found [M+Na]<sup>+</sup> = 275.1216; C<sub>15</sub>H<sub>18</sub>F<sub>2</sub>O<sub>2</sub>Na requires 275.1218.

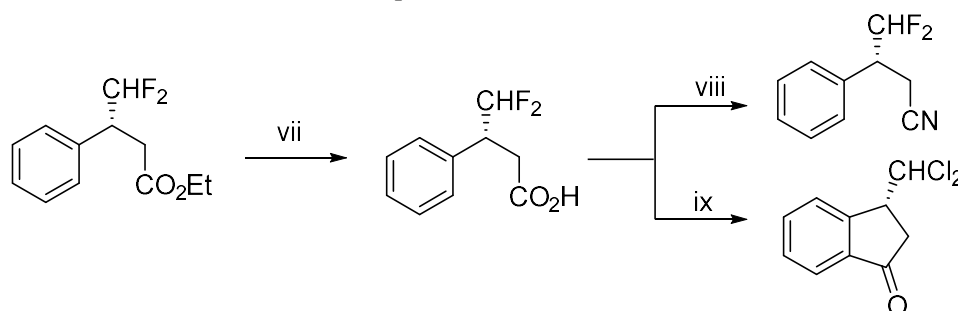

**Procedure vii:**

A solution of corresponding ester (1 equiv.) and 2M NaOH in MeOH was heated to reflux for 1 h. After cooling down to room temperature, the solution was extracted with DCM (3x). The aqueous phase was acidified to PH 2~3 and extracted with ethyl acetate (3x). The combined organic phase (ethyl acetate phase) was dried over Na<sub>2</sub>SO<sub>4</sub>, and evaporated to afford pure acid.

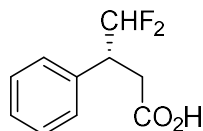

**(R)-4,4-difluoro-3-phenylbutanoic acid (11)**

Colorless oil. <sup>1</sup>H NMR (400 MHz, Chloroform-*d*) δ 7.39 – 7.26 (m, 5H), 5.92 (td, *J* = 56.25, 3.29 Hz, 1H), 3.69 – 3.52 (m, 1H), 3.02 (dd, *J* = 16.80, 5.68 Hz, 1H), 2.83 (dd, *J* = 16.73, 8.96 Hz, 1H). <sup>13</sup>C NMR (101 MHz, Chloroform-*d*) δ 175.7, 135.5 (dd, *J* = 5.45, 2.25 Hz), 129.0, 128.8, 128.3, 116.9 (t, *J* = 245.15 Hz), 45.7 (t, *J* = 20.45 Hz), 33.0 (dd, *J* = 5.31, 3.85 Hz). <sup>19</sup>F NMR (377 MHz, Chloroform-*d*) δ -119.2 (d, *J* = 278.32 Hz), -124.0 (d, *J* = 278.42 Hz). HRMS-ESI: Found [M+Na]<sup>+</sup> = 223.0544; C<sub>10</sub>H<sub>10</sub>F<sub>2</sub>O<sub>2</sub>Na requires 223.0541.

**Procedure viii:**

To a solution of corresponding acid (1 equiv.) in dioxane were added Boc<sub>2</sub>O (1.3 equiv.), (NH<sub>4</sub>)<sub>2</sub>CO<sub>3</sub> (1.3 equiv.) and pyridine (40 equiv.). After stirring for 18 h at 25 °C, the solvent was evaporated. The residue was diluted with EtOAc and the combined organic layers were washed with a 20% aqueous solution of citric acid (3x), brine (1x) and dried over Na<sub>2</sub>SO<sub>4</sub>. The solvent was evaporated and the residue was dissolved in DCM. To the solution was added (CF<sub>3</sub>CO)<sub>2</sub>O (1.3 equiv.) and Et<sub>3</sub>N (2.7 equiv.). The mixture was stirred at 25 °C for 1h and poured over H<sub>2</sub>O. The mixture was extracted with DCM (3x) and dried over Na<sub>2</sub>SO<sub>4</sub>. The



solvent was evaporated and the residue was purified by column chromatography to afford the desired nitrile.

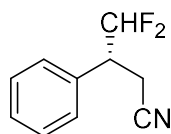

**(R)-4,4-difluoro-3-phenylbutanenitrile (12)**

Colorless oil. <sup>1</sup>H NMR (400 MHz, Chloroform-*d*) δ 7.45 – 7.36 (m, 3H), 7.33 – 7.28 (m, 2H), 5.99 (td, *J* = 55.58, 3.18 Hz, 1H), 3.51 – 3.35 (m, 1H), 2.96 (dd, *J* = 16.98, 5.56 Hz, 1H), 2.83 (dd, *J* = 16.98, 9.28 Hz, 1H). <sup>13</sup>C NMR (101 MHz, Chloroform-*d*) δ 133.7 (dd, *J* = 5.64, 2.09 Hz), 129.4, 129.1, 128.5, 117.3, 116.0 (t, *J* = 249.45 Hz), 46.3 (dd, *J* = 21.42, 19.97 Hz), 17.7 (dd, *J* = 6.97, 4.43 Hz). <sup>19</sup>F NMR (377 MHz, Chloroform-*d*) δ -118.1 (d, *J* = 281.30 Hz), -125.6 (d, *J* = 280.92 Hz). HRMS-ESI: Found [M+Na]<sup>+</sup> = 204.0601; C<sub>10</sub>H<sub>9</sub>F<sub>2</sub>NNa requires 204.0595.

Procedure ix:

The carboxylic acid (1 equiv) and cyanuric chloride (1.6 equiv) were dissolved in DCM. Pyridine (1 equiv) was drop-wise, and the mixture was stirred vigorously. After 15 min at room temperature, AlCl<sub>3</sub> (3 equiv) was added portion-wise. After the reaction was deemed complete, it was then filtered through Celite and the organic phase was washed with cooled water three times. The organic layer was dried over anhydrous Na<sub>2</sub>SO<sub>4</sub>, filtered and the solvent was evaporated. The crude product was purified by column chromatography.

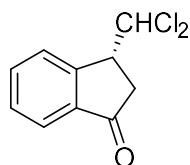

**(R)-3-(dichloromethyl)-2,3-dihydro-1H-inden-1-one (13)**

White solid. <sup>1</sup>H NMR (400 MHz, Chloroform-*d*) δ 7.81 (dt, *J* = 7.57, 1.07 Hz, 1H), 7.72 – 7.63 (m, 2H), 7.56 – 7.45 (m, 1H), 6.21 (d, *J* = 3.29 Hz, 1H), 4.19 (td, *J* = 5.33, 3.15 Hz, 1H), 2.93 (s, 1H), 2.92 (d, *J* = 0.71 Hz, 1H). <sup>13</sup>C NMR (101 MHz, Chloroform-*d*) δ 203.2, 151.4, 138.2, 135.1, 129.5, 126.1, 124.2, 74.9, 48.8, 39.3. HRMS-ESI: Found [M+Na]<sup>+</sup> = 236.9846; C<sub>10</sub>H<sub>8</sub>Cl<sub>2</sub>ONa requires 236.9844 (Cl<sup>35</sup>).

**7. Separation method data and specific rotation of chiral compounds**

| Entry | Product | Separation method                                                                  | Optical rotation                                                        | ee (%) |
|-------|---------|------------------------------------------------------------------------------------|-------------------------------------------------------------------------|--------|
| 1     |         | SFC, ASH column, 5% MeOH, 2 ml/min, t <sub>R</sub> = 7.45 min (major)/8.07 (minor) | [α] <sub>D</sub> <sup>25.0</sup> = -33 (C = 0.10 in CHCl <sub>3</sub> ) | 96     |
| 2     |         | SFC, ADH column, 5% MeOH, 2 ml/min, t <sub>R</sub> = 2.57 min (major)/2.80 (minor) | [α] <sub>D</sub> <sup>25.0</sup> = -44 (C = 0.10 in CHCl <sub>3</sub> ) | 93     |
| 3     |         | SFC, ADH column, 5% MeOH, 2 ml/min, t <sub>R</sub> = 2.84 min (major)/3.25 (minor) | [α] <sub>D</sub> <sup>25.0</sup> = -28 (C = 0.10 in CHCl <sub>3</sub> ) | 92     |

|    |                                                                                     |                                                                                                          |                                                              |    |
|----|-------------------------------------------------------------------------------------|----------------------------------------------------------------------------------------------------------|--------------------------------------------------------------|----|
| 4  | 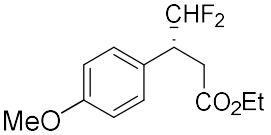   | <b>SFC</b> , OJH column, 5% MeOH, 2 ml/min, $t_R = 3.59$ min (minor)/3.83 (major)                        | $[\alpha]_D^{25.0} = -36$<br>(C= 0.10 in CHCl <sub>3</sub> ) | 91 |
| 5  |    | <b>SFC</b> , IF column, 5% MeOH, 2 ml/min, $t_R = 3.66$ min (major)/4.10 (minor)                         | $[\alpha]_D^{25.0} = -37$<br>(C= 0.10 in CHCl <sub>3</sub> ) | 90 |
| 6  |    | <b>SFC</b> , ADH column, 5% MeOH, 2 ml/min, from <i>E</i> -isomer: $t_R = 2.21$ min (major)/2.36 (minor) | $[\alpha]_D^{25.0} = -40$<br>(C= 0.10 in CHCl <sub>3</sub> ) | 93 |
| 7  |    | <b>GC-MS</b> , Chiraldex β-DM, 90 °C iso 200 min, 1.0 mL/min. $t_R = 108.2$ min (minor)/110.0 (major)    | $[\alpha]_D^{25.0} = -19$<br>(C= 0.10 in CHCl <sub>3</sub> ) | 92 |
| 8  |    | <b>GC-MS</b> , Chiraldex β-DM, 50 to 170 °C, 1 °C/min, 1.0 mL/min, $t_R = 84.7$ min (minor)/85.4 (major) | $[\alpha]_D^{25.0} = -16$<br>(C= 0.10 in CHCl <sub>3</sub> ) | 95 |
| 9  |   | <b>SFC</b> , IF column, 5% MeOH, 2 ml/min, $t_R = 2.52$ min (major)/2.64 (minor)                         | $[\alpha]_D^{25.0} = -28$<br>(C= 0.10 in CHCl <sub>3</sub> ) | 98 |
| 10 |  | <b>SFC</b> , ADH column, 5% MeOH, 2 ml/min, $t_R = 2.20$ min (major)/2.28 (minor)                        | $[\alpha]_D^{25.0} = -22$<br>(C= 0.1 in CHCl <sub>3</sub> )  | 94 |
| 11 |  | <b>SFC</b> , IF column, 5% MeOH, 2 ml/min, $t_R = 4.28$ min (minor)/4.44 (major)                         | $[\alpha]_D^{25.0} = -18$<br>(C= 0.10 in CHCl <sub>3</sub> ) | 97 |
| 12 |  | <b>SFC</b> , IF column, 5% MeOH, 2 ml/min, $t_R = 4.95$ min (major)/5.25 (minor)                         | $[\alpha]_D^{25.0} = -24$<br>(C= 0.10 in CHCl <sub>3</sub> ) | 93 |
| 13 |  | <b>SFC</b> , ADH column, 5% MeOH, 2 ml/min, $t_R = 5.81$ min (major)/7.79 (minor)                        | $[\alpha]_D^{25.0} = -17$<br>(C= 0.10 in CHCl <sub>3</sub> ) | 72 |
| 14 |  | <b>SFC</b> , ASH column, 5% MeOH, 2 ml/min, $t_R = 2.48$ min (minor)/2.59 (major)                        | $[\alpha]_D^{25.0} = +38$<br>(C= 0.10 in CHCl <sub>3</sub> ) | 76 |

|    |  |                                                                                                                   |                                                                |    |
|----|--|-------------------------------------------------------------------------------------------------------------------|----------------------------------------------------------------|----|
| 15 |  | <b>SFC</b> , AYH column, 5% MeOH, 2 ml/min, $t_R = 3.27$ min (only)                                               | $[\alpha]_D^{25.0} = +41$<br>( $C = 0.77$ in $\text{CHCl}_3$ ) | 99 |
| 16 |  | <b>SFC</b> , IF column, 5% MeOH, 2 ml/min, $t_R = 10.31$ min (minor)/11.10 min (major)                            | $[\alpha]_D^{25.0} = -9$<br>( $C = 0.73$ in $\text{CHCl}_3$ )  | 90 |
| 17 |  | <b>GC-MS</b> , Hydrodex $\beta$ -DM, 50 - 180 °C, 1 degree/min, $t_R = 42.7$ min (minor) /43.4 min (major)        | $[\alpha]_D^{25.0} = -28$<br>( $C = 0.10$ in $\text{CHCl}_3$ ) | 81 |
| 18 |  | <b>GC-MS</b> , Hydrodex $\beta$ -DM, 100 °C iso 100 min, 1 degree/min, $t_R = 36.4$ min (minor) /38.3 min (major) | $[\alpha]_D^{25.0} = -40$<br>( $C = 0.45$ in $\text{CHCl}_3$ ) | 91 |
| 19 |  | <b>GC-MS</b> , Hydrodex $\beta$ -DM, 80 °C iso 80 min, 1 degree/min, $t_R = 62.9$ min (minor) /65.2 min (major)   | $[\alpha]_D^{25.0} = -22$<br>( $C = 0.30$ in $\text{CHCl}_3$ ) | 92 |
| 20 |  | <b>SFC</b> , OJH column, 5% MeOH, 2 ml/min, $t_R = 2.62$ min (major)/2.75 min (minor)                             | $[\alpha]_D^{25.0} = -27$<br>( $C = 0.10$ in $\text{CHCl}_3$ ) | 89 |
| 21 |  | <b>GC-MS</b> , Hydrodex $\beta$ -DM, 60 °C iso 150 min, 1 degree/min, $t_R = 56.3$ min (minor) /58.1 min (major)  | $[\alpha]_D^{25.0} = -19$<br>( $C = 0.10$ in $\text{CHCl}_3$ ) | 87 |
| 22 |  | <b>GC-MS</b> , Hydrodex $\beta$ -DM, 30 °C iso, 1 degree/min, $t_R = 19.9$ min (major) /22.6 min (minor)          | $[\alpha]_D^{25.0} = -6$<br>( $C = 0.10$ in $\text{CHCl}_3$ )  | 88 |
| 23 |  | <b>GC-MS</b> , Hydrodex $\beta$ -DM, 30 °C iso, 1 degree/min, $t_R = 42.3$ min (major) /49.7 min (minor)          | $[\alpha]_D^{25.0} = -44$<br>( $C = 0.10$ in $\text{CHCl}_3$ ) | 82 |
| 24 |  | <b>SFC</b> , IF column, 5% MeOH, 2 ml/min, $t_R = 3.42$ min (major)/3.71 min (minor)                              | $[\alpha]_D^{25.0} = -15$<br>( $C = 0.10$ in $\text{CHCl}_3$ ) | 84 |

|    |                                                                                     |                                                                                                             |                                                              |    |
|----|-------------------------------------------------------------------------------------|-------------------------------------------------------------------------------------------------------------|--------------------------------------------------------------|----|
| 25 | 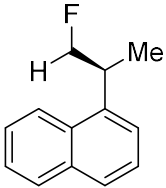   | <b>GC-MS</b> , Hydrodex β-6TBDM, 120 °C iso 70 min, 1 degree/min, $t_R = 59.0$ min (minor) /61.0 (major)    | $[\alpha]_D^{25.0} = +23$<br>(C= 0.10 in CHCl <sub>3</sub> ) | 94 |
| 26 |    | <b>HPLC</b> , ODH column, 2% iPrOH/Hexane, 0.5 ml/min, $t_R = 11.46$ min (major)/12.18 min (minor)          | $[\alpha]_D^{25.0} = +14$<br>(C= 0.10 in CHCl <sub>3</sub> ) | 94 |
| 27 |    | <b>HPLC</b> , ODH column, 2% iPrOH/Hexane, 0.5 ml/min, $t_R = 10.79$ min (major)/11.38 min (minor)          | $[\alpha]_D^{25.0} = +3$<br>(C= 0.10 in CHCl <sub>3</sub> )  | 95 |
| 28 |    | <b>HPLC</b> , ODH column, 2% iPrOH/Hexane, 0.5 ml/min, $t_R = 11.05$ min (major)/13.67 min (minor)          | $[\alpha]_D^{25.0} = +12$<br>(C= 0.10 in CHCl <sub>3</sub> ) | 98 |
| 29 |  | <b>GC-MS</b> , Hydrodex β-6TBDM, 120 °C iso 300 min, 1 degree/min, $t_R = 123.9$ min (minor) /131.0 (major) | $[\alpha]_D^{25.0} = +21$<br>(C= 0.10 in CHCl <sub>3</sub> ) | 90 |
| 30 |  | <b>GC-MS</b> , Hydrodex β-6TBDM, 120 °C iso 300 min, 1 degree/min, $t_R = 266.3$ min (minor) /285.6 (major) | $[\alpha]_D^{25.0} = +14$<br>(C= 0.10 in CHCl <sub>3</sub> ) | 94 |
| 31 |  | <b>HPLC</b> , ODH column, 2% iPrOH/Hexane, 0.5 ml/min, $t_R = 12.35$ min (major)/16.35 min (minor)          | $[\alpha]_D^{25.0} = +17$<br>(C= 0.10 in CHCl <sub>3</sub> ) | 98 |
| 32 |  | <b>GC-MS</b> , Hydrodex β-6TBDM, 90 °C iso 120 min, 1 degree/min, $t_R = 65.3$ min (minor) /68.3 (major)    | $[\alpha]_D^{25.0} = +15$<br>(C= 0.10 in CHCl <sub>3</sub> ) | 92 |

|    |                                                                                     |                                                                                                         |                                                              |    |
|----|-------------------------------------------------------------------------------------|---------------------------------------------------------------------------------------------------------|--------------------------------------------------------------|----|
| 33 | 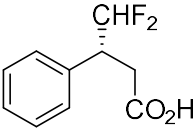   | <b>SFC</b> , ADH column, 10% MeOH, 2 ml/min, $t_R = 6.12$ min (major)/6.65 (minor)                      | $[\alpha]_D^{25.0} = -20$<br>(C= 0.10 in CHCl <sub>3</sub> ) | 95 |
| 34 |    | <b>SFC</b> , ADH column, 5% MeOH, 2 ml/min, $t_R = 4.32$ min (major)/4.71 (minor)                       | $[\alpha]_D^{25.0} = -24$<br>(C= 0.10 in CHCl <sub>3</sub> ) | 95 |
| 35 |    | <b>SFC</b> , ASH column, 10% MeOH, 2 ml/min, $t_R = 4.91$ min (major)/5.35 (minor)                      | $[\alpha]_D^{25.0} = -16$<br>(C= 0.10 in CHCl <sub>3</sub> ) | 95 |
| 36 |    | <b>SFC</b> , IA column, 5% MeOH, 2 ml/min, $t_R = 17.42$ min (major)/19.10 (minor)                      | $[\alpha]_D^{25.0} = +28$<br>(C= 0.10 in CHCl <sub>3</sub> ) | 95 |
| 37 |    | <b>SFC</b> , ASH column, 5% MeOH, 2 ml/min, $t_R = 3.38$ min (minor)/3.89 (major)                       | $[\alpha]_D^{25.0} = +25$<br>(C= 0.10 in CHCl <sub>3</sub> ) | 95 |
| 38 |   | <b>SFC</b> , ASH column, 10% MeOH, 2 ml/min, $t_R = 2.80$ min (minor)/3.09 (major)                      | $[\alpha]_D^{25.0} = +18$<br>(C= 0.10 in CHCl <sub>3</sub> ) | 95 |
| 39 |  | <b>SFC</b> , OJH column, 5% MeOH, 2 ml/min, $t_R = 9.51$ min (minor)/11.96 (major)                      | $[\alpha]_D^{25.0} = +31$<br>(C= 0.10 in CHCl <sub>3</sub> ) | 94 |
| 40 |  | <b>GC-MS</b> , Chiraldex β-DM, 50 °C iso 200 min, 1 degree/min, $t_R = 184.0$ min (minor)/187.2 (major) | $[\alpha]_D^{25.0} = -24$<br>(C= 0.10 in CHCl <sub>3</sub> ) | 95 |
| 41 |  | <b>SFC</b> , ASH column, 5% MeOH, 2 ml/min, $t_R = 4.25$ min (major)/4.87 (minor)                       | $[\alpha]_D^{25.0} = -28$<br>(C= 0.10 in CHCl <sub>3</sub> ) | 94 |
| 42 |  | <b>SFC</b> , IF column, 5% MeOH, 2 ml/min, $t_R = 19.54$ min (minor)/20.18 (major)                      | $[\alpha]_D^{25.0} = -19$<br>(C= 0.10 in CHCl <sub>3</sub> ) | 94 |

## 8. Absolute configuration determination

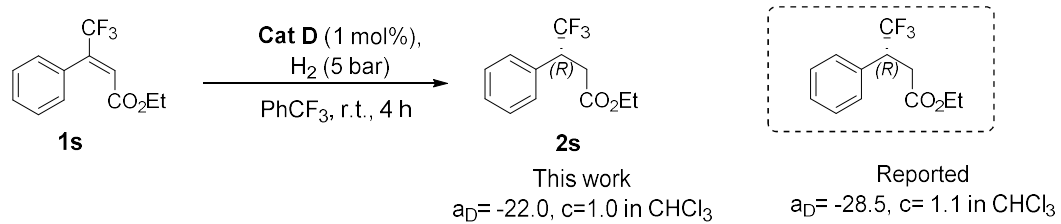

Substrate **1s** was hydrogenated to obtain **2s** (99% yield, 92% *ee*). The optical rotations were  $[\alpha]^{25}_D = -22.0$  ( $c = 1, \text{CHCl}_3$ ). This was confirmed to be the (*R*)-configuration for the product **2s** by comparison with the optical rotation data with literature.<sup>4</sup>

## 9. NMR Spectra

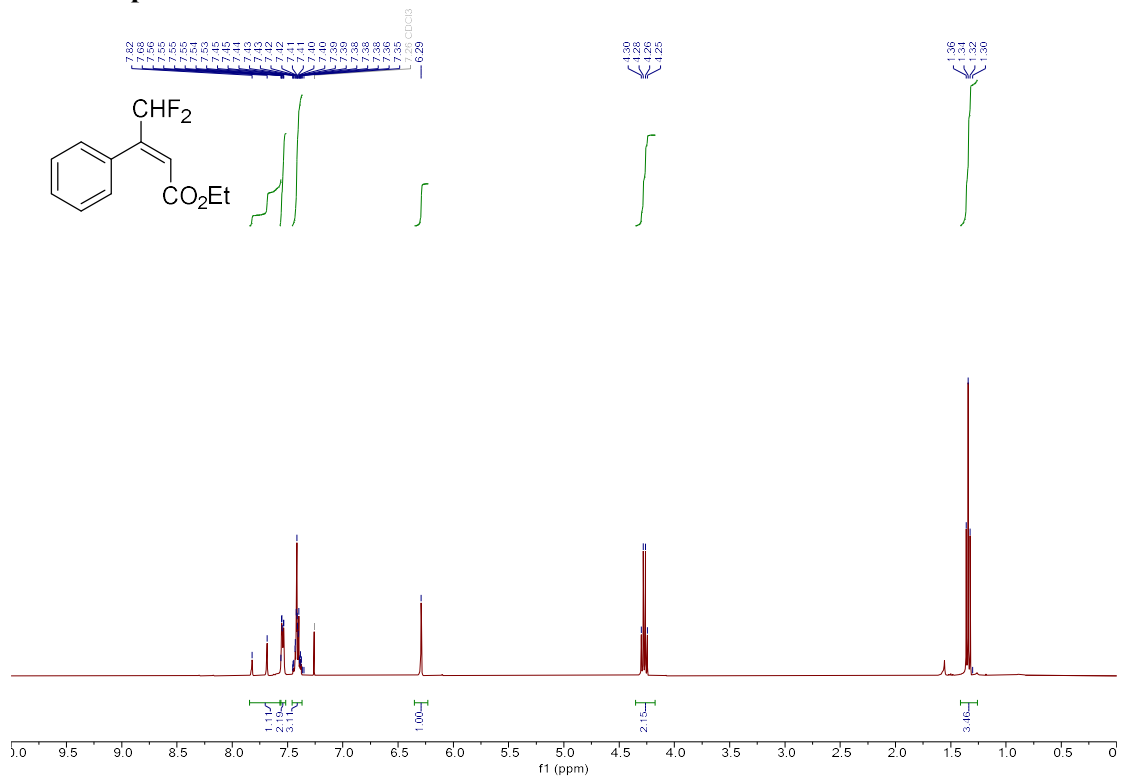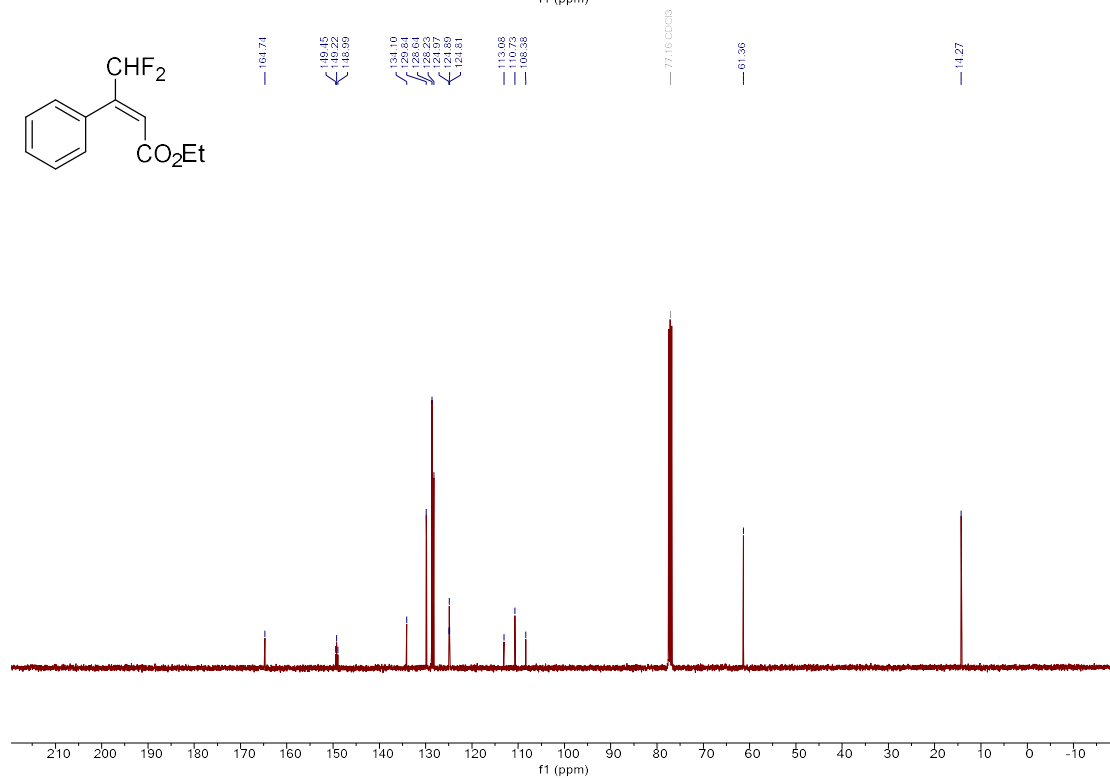

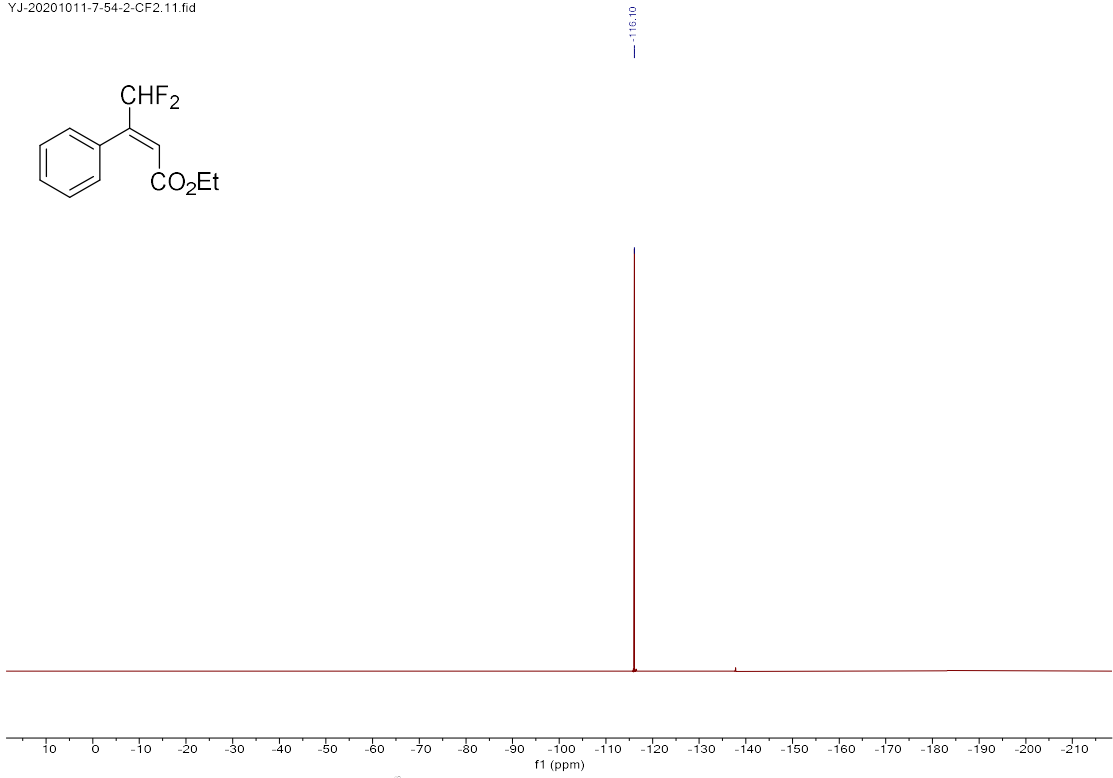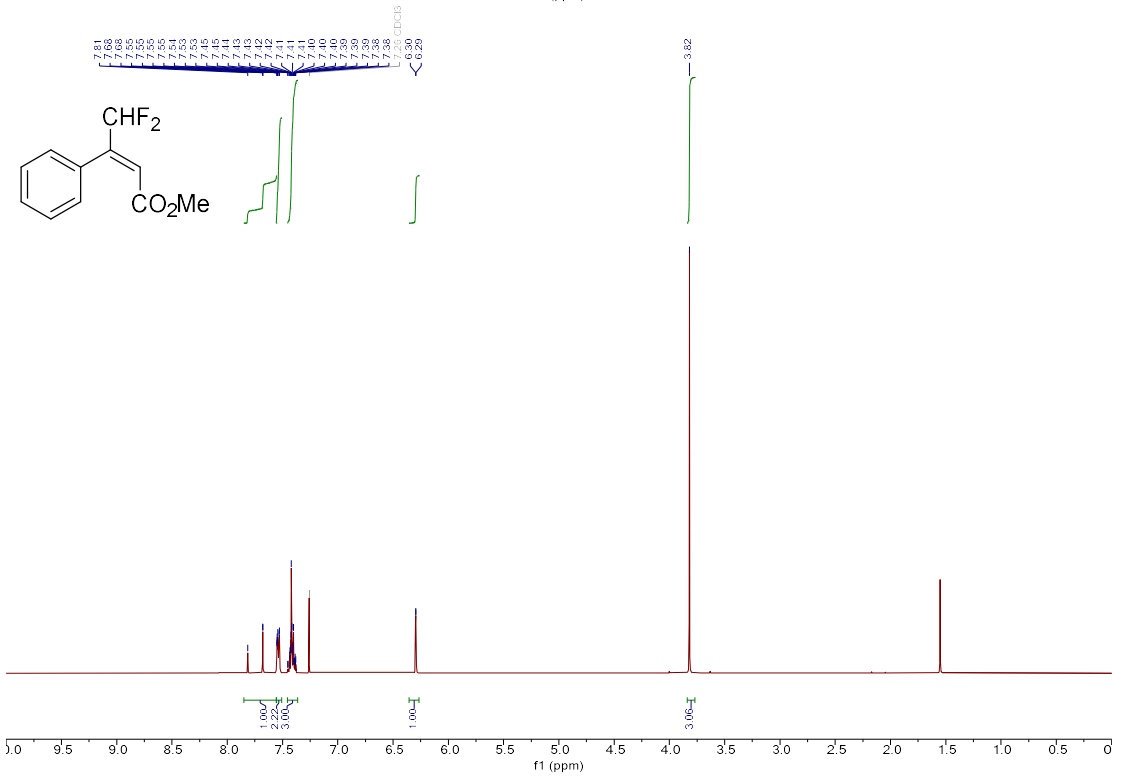



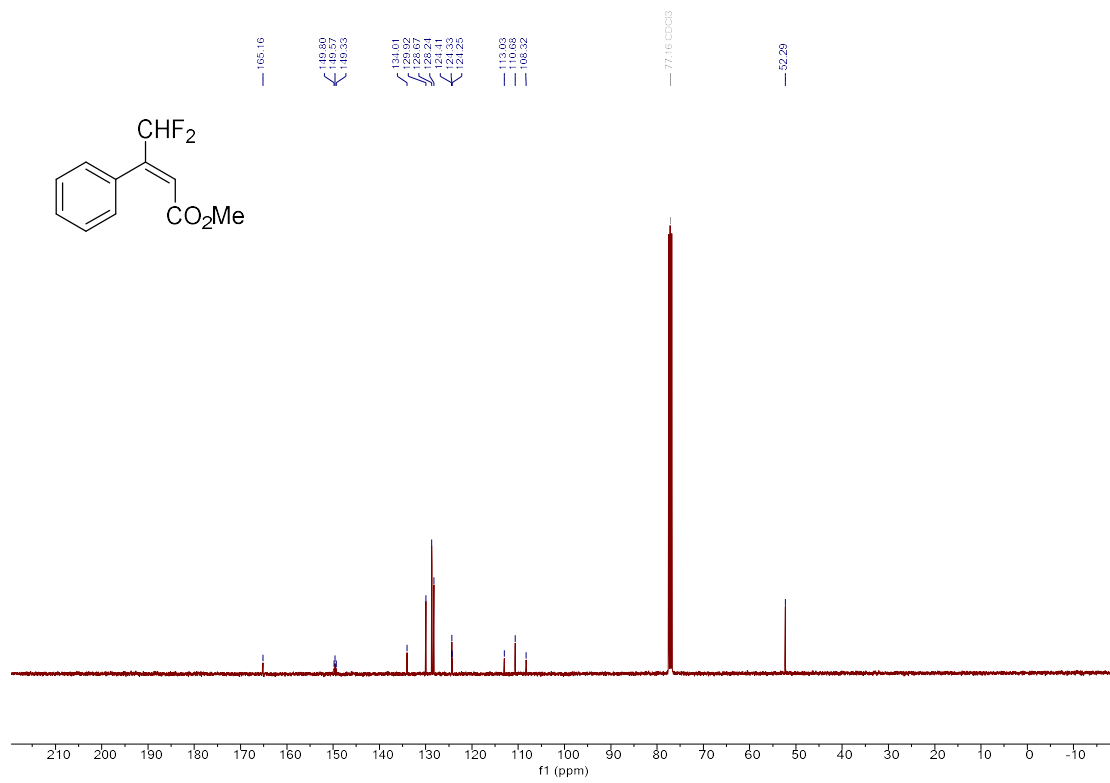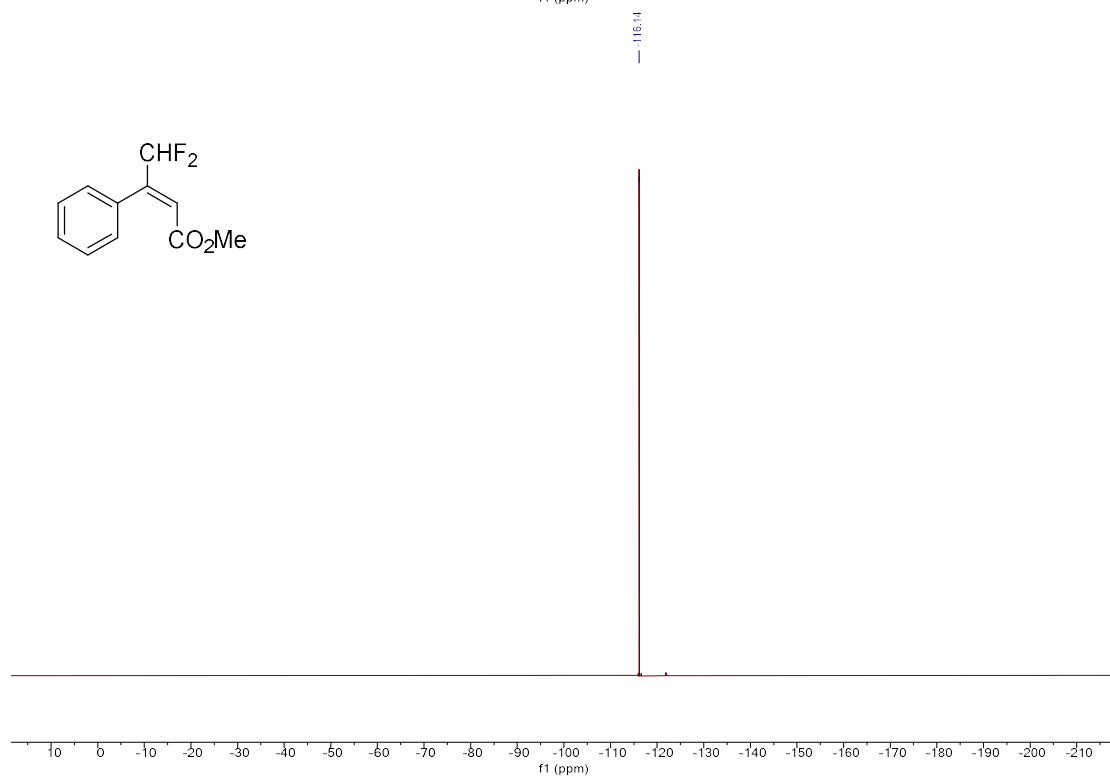

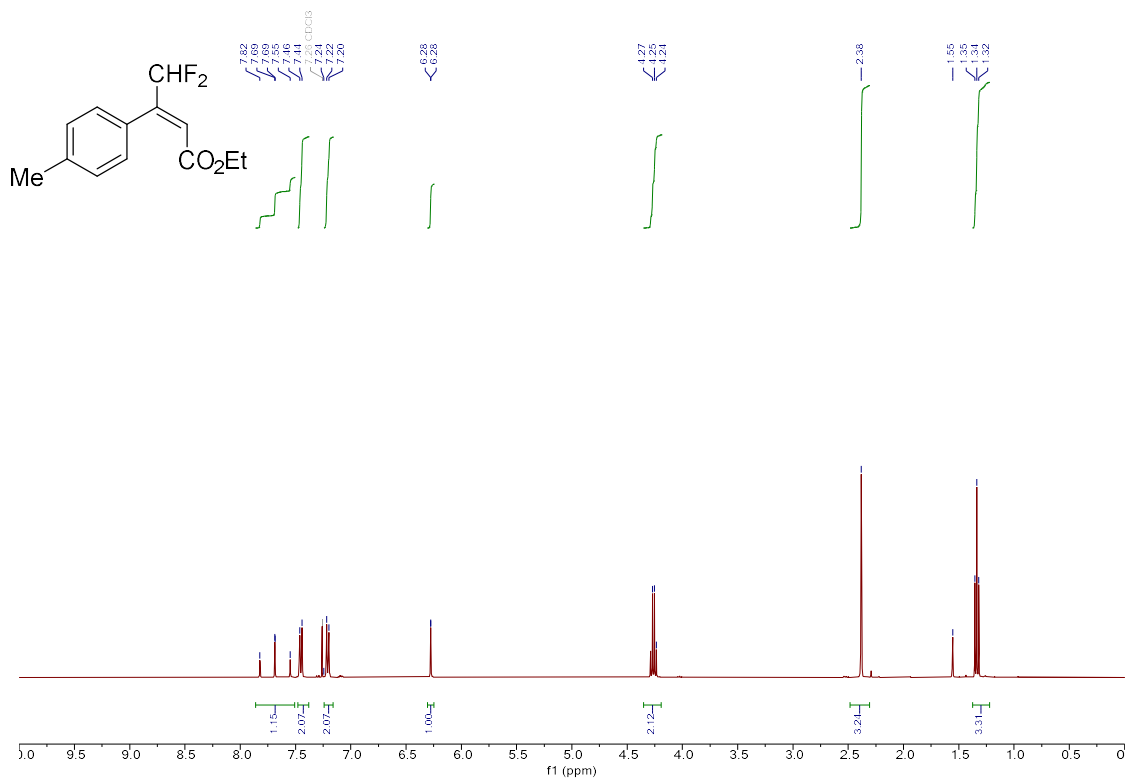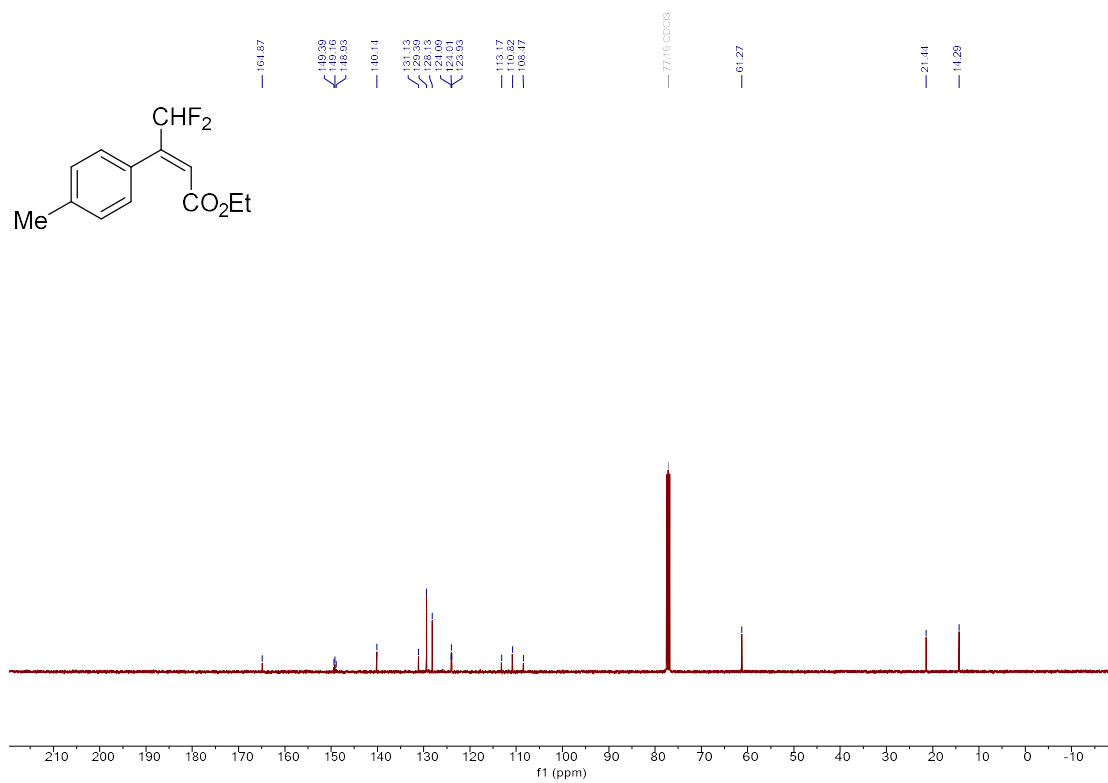

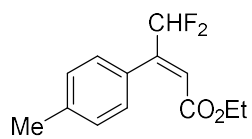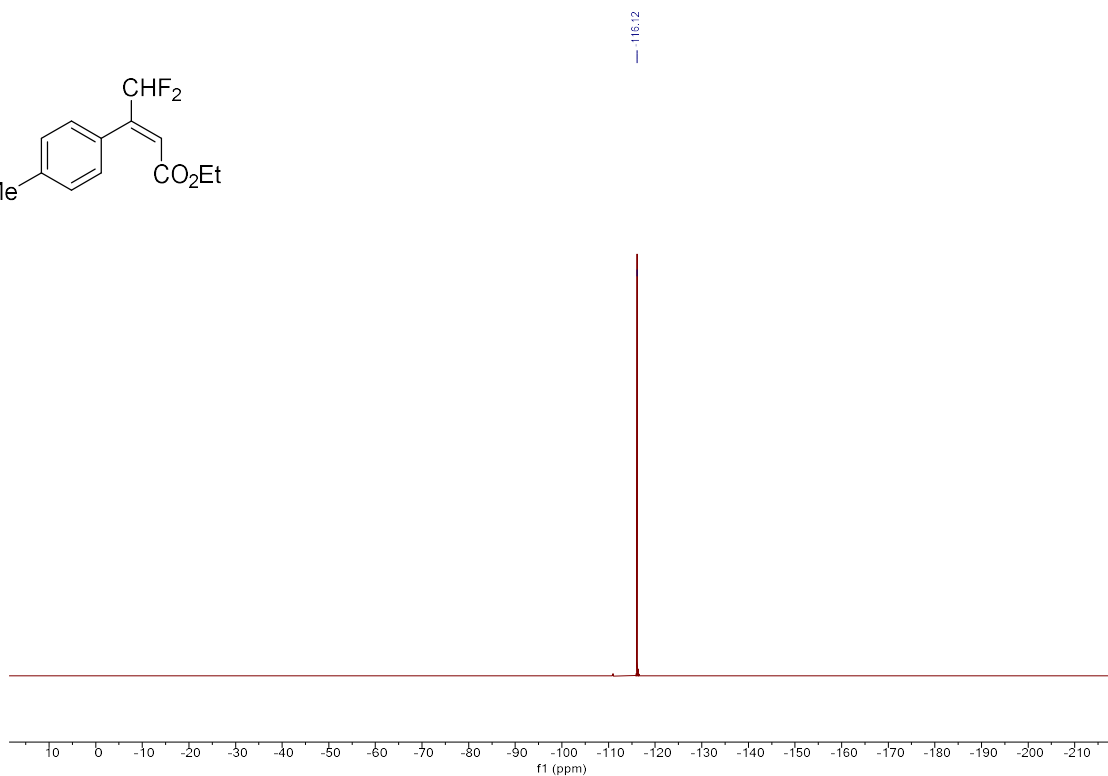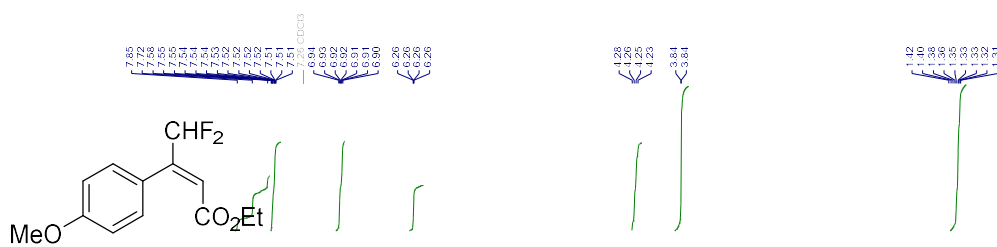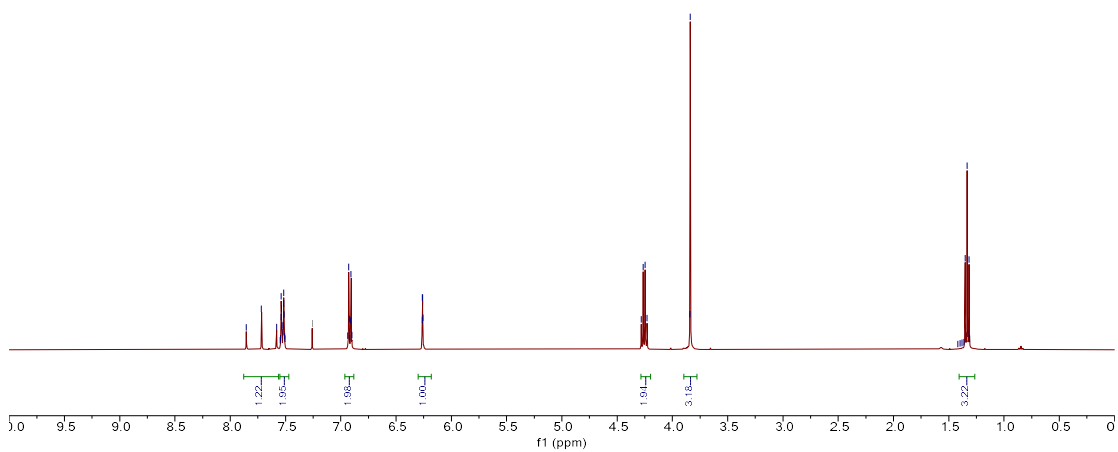

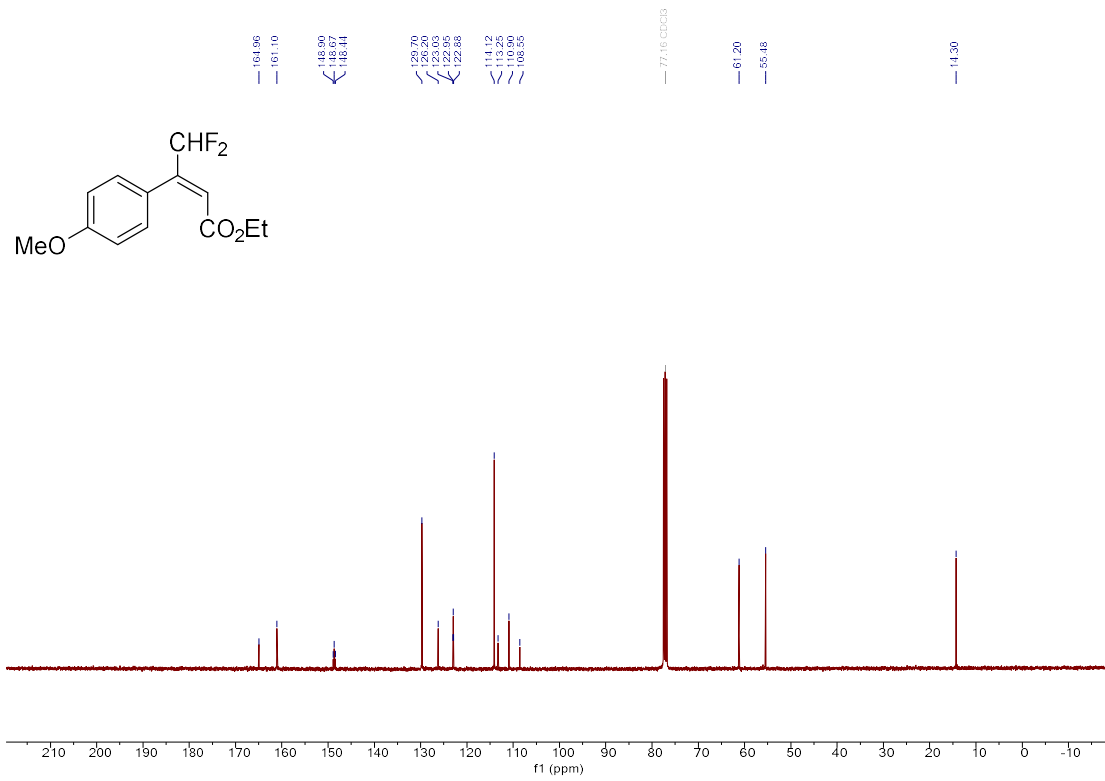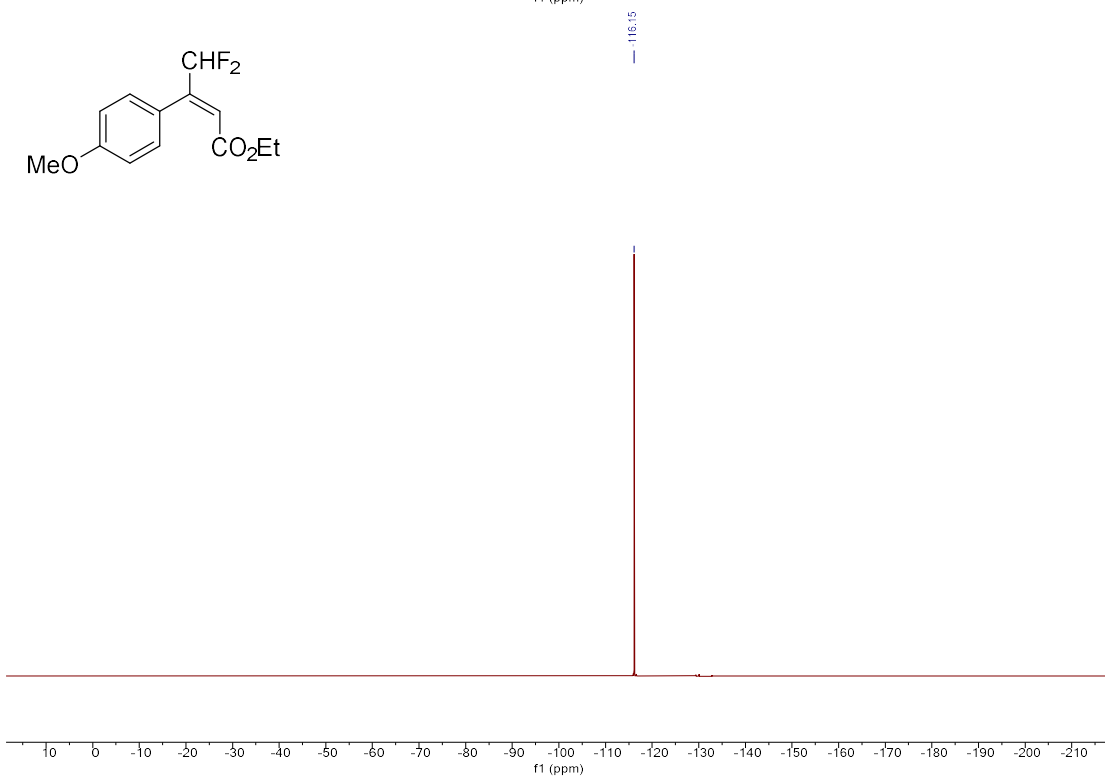

YJ-20201011-7-54-5-MeOme.10.fid

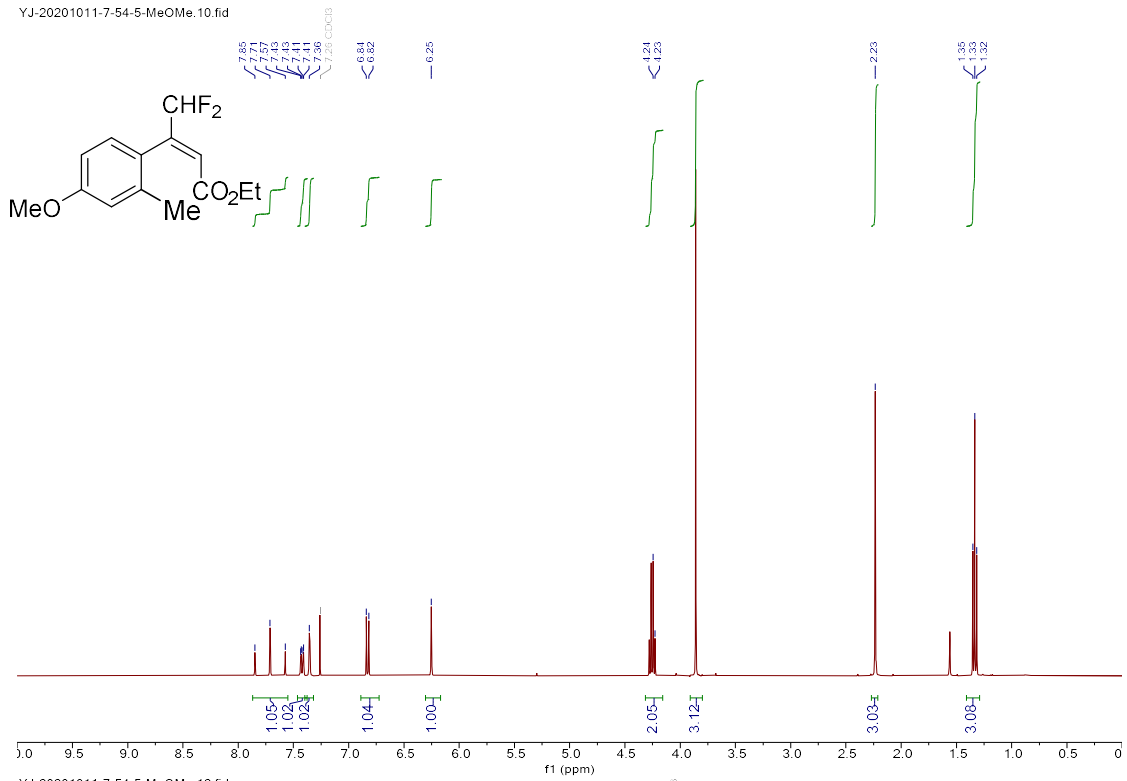

YJ-20201011-7-54-5-MeOme.12.fid

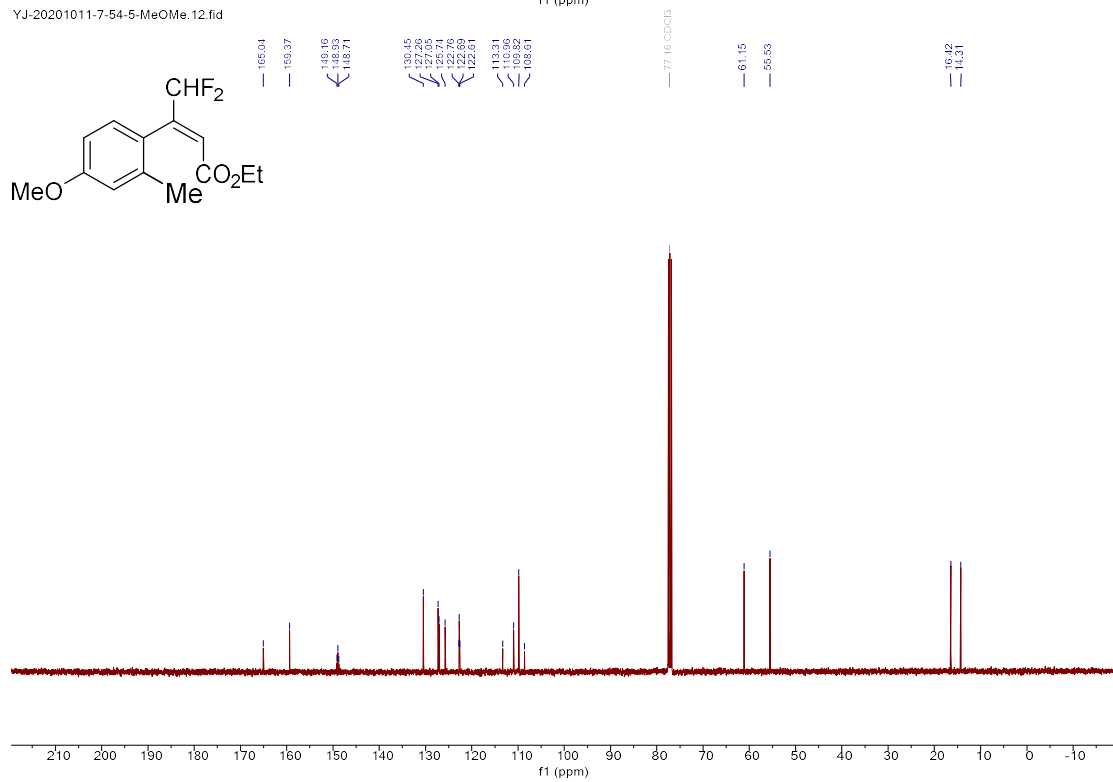

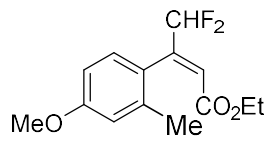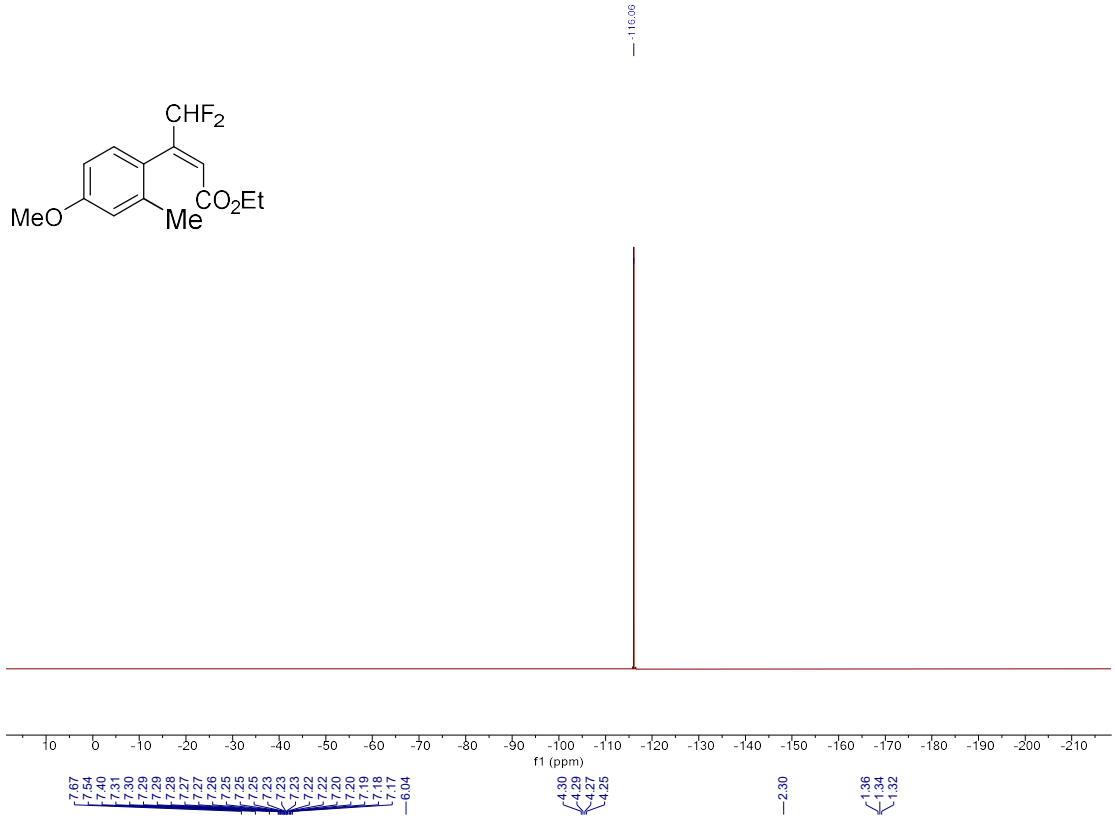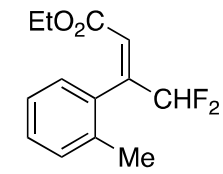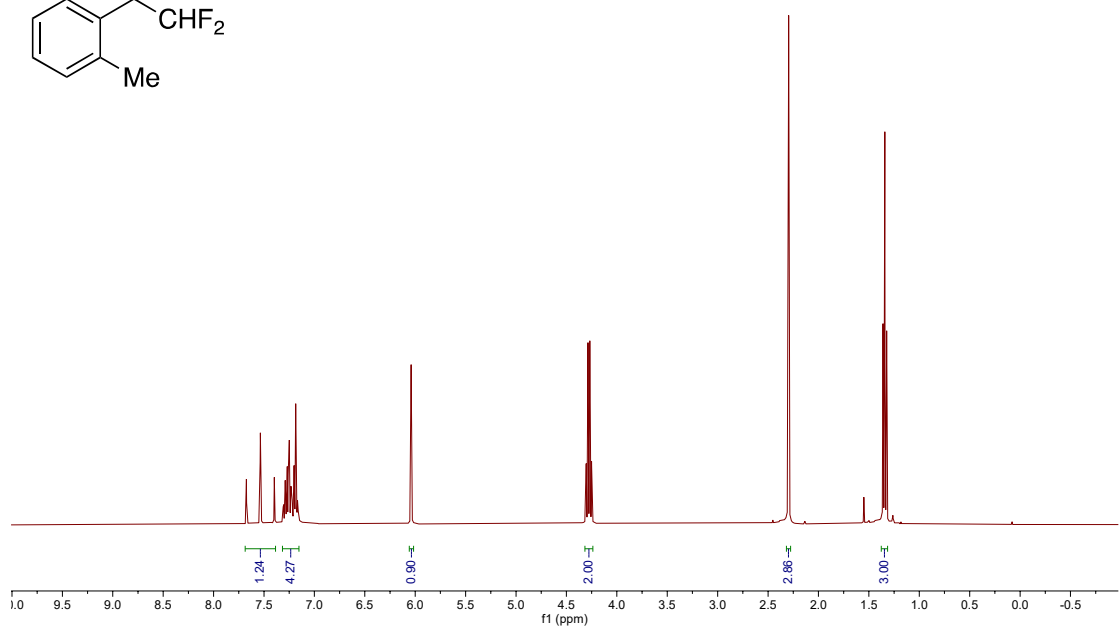

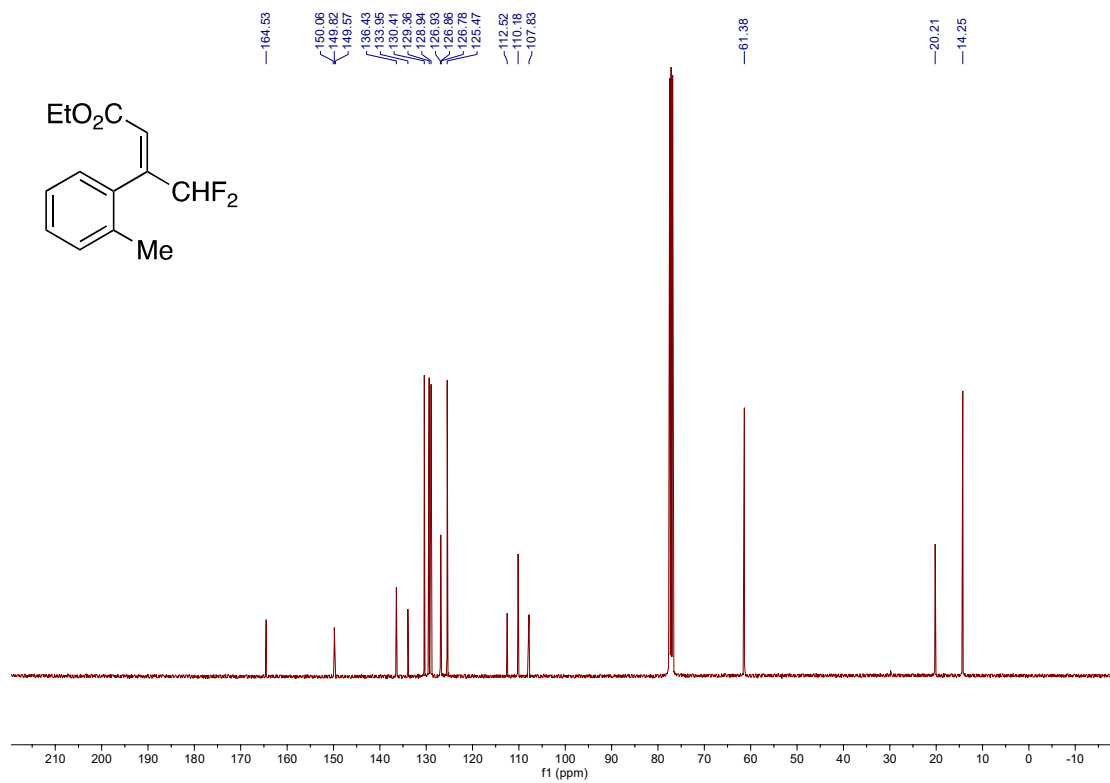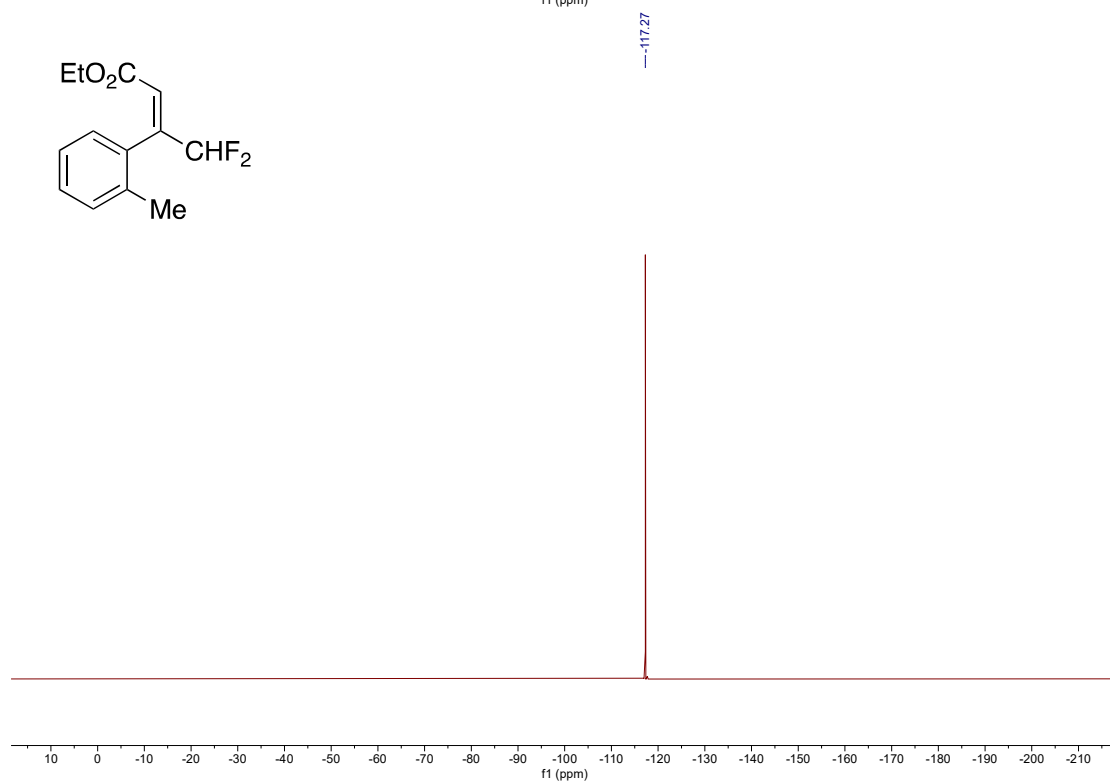

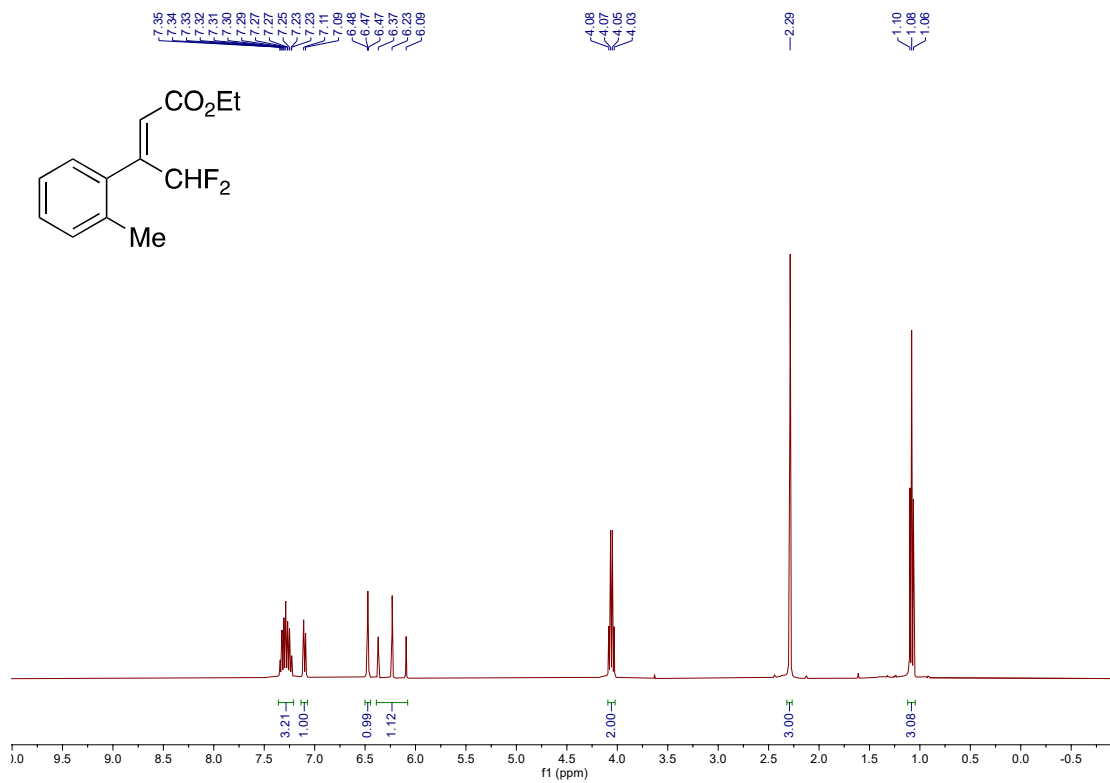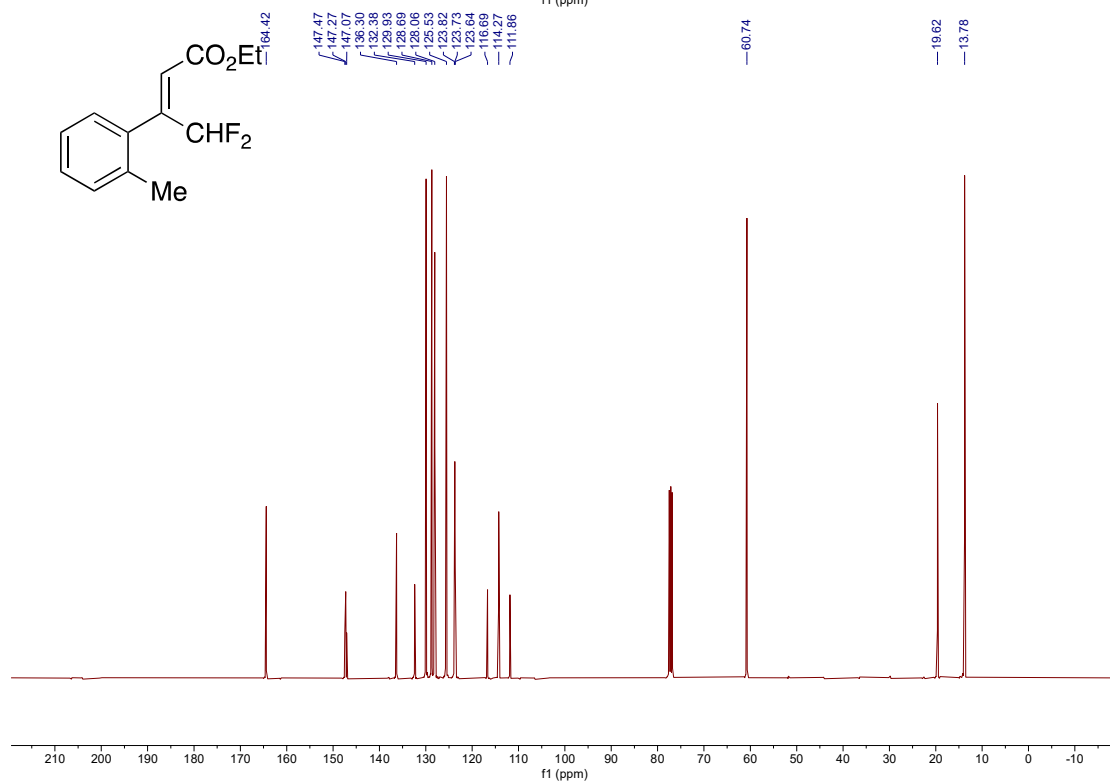



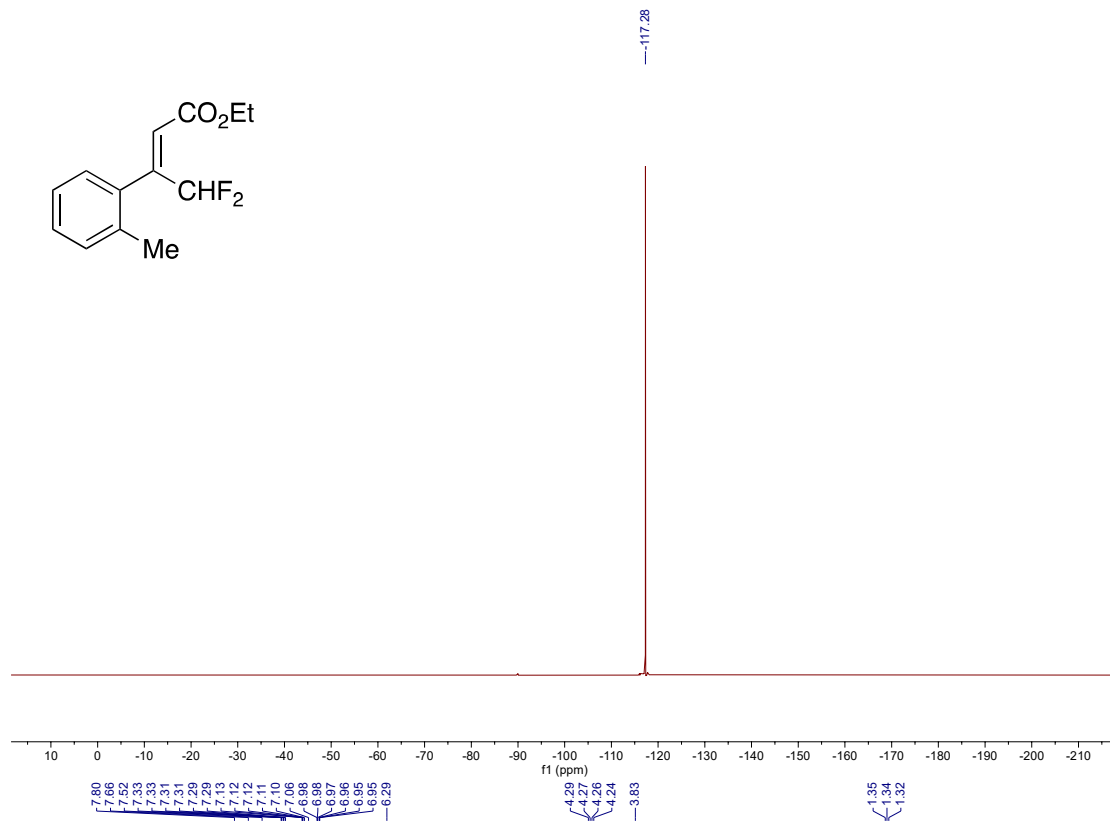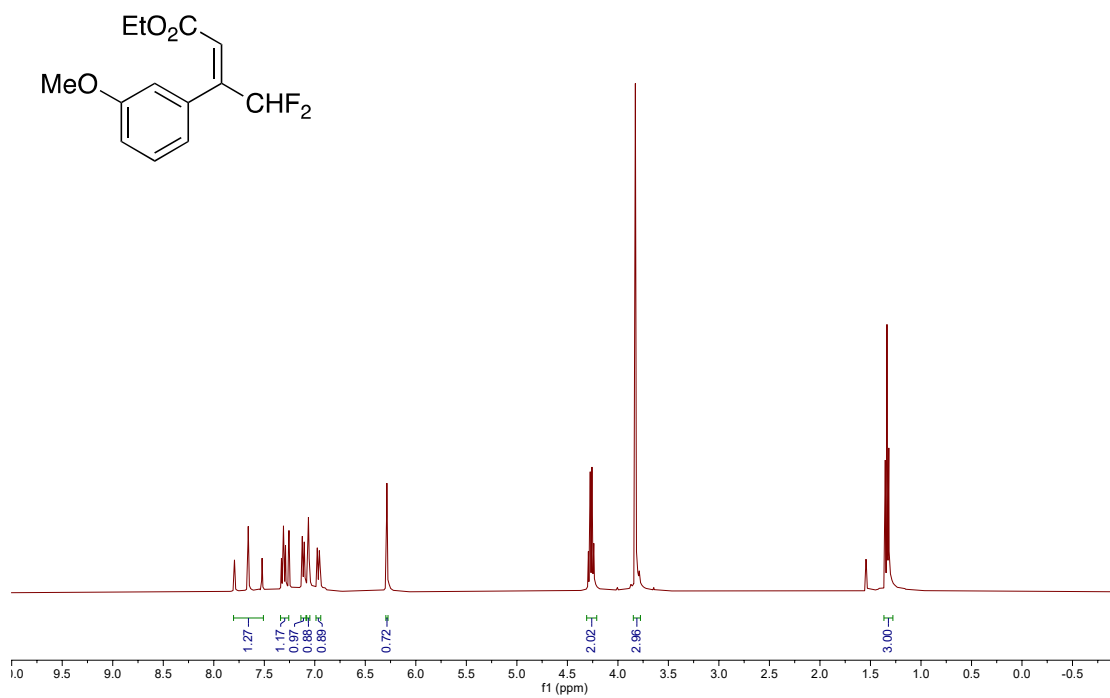

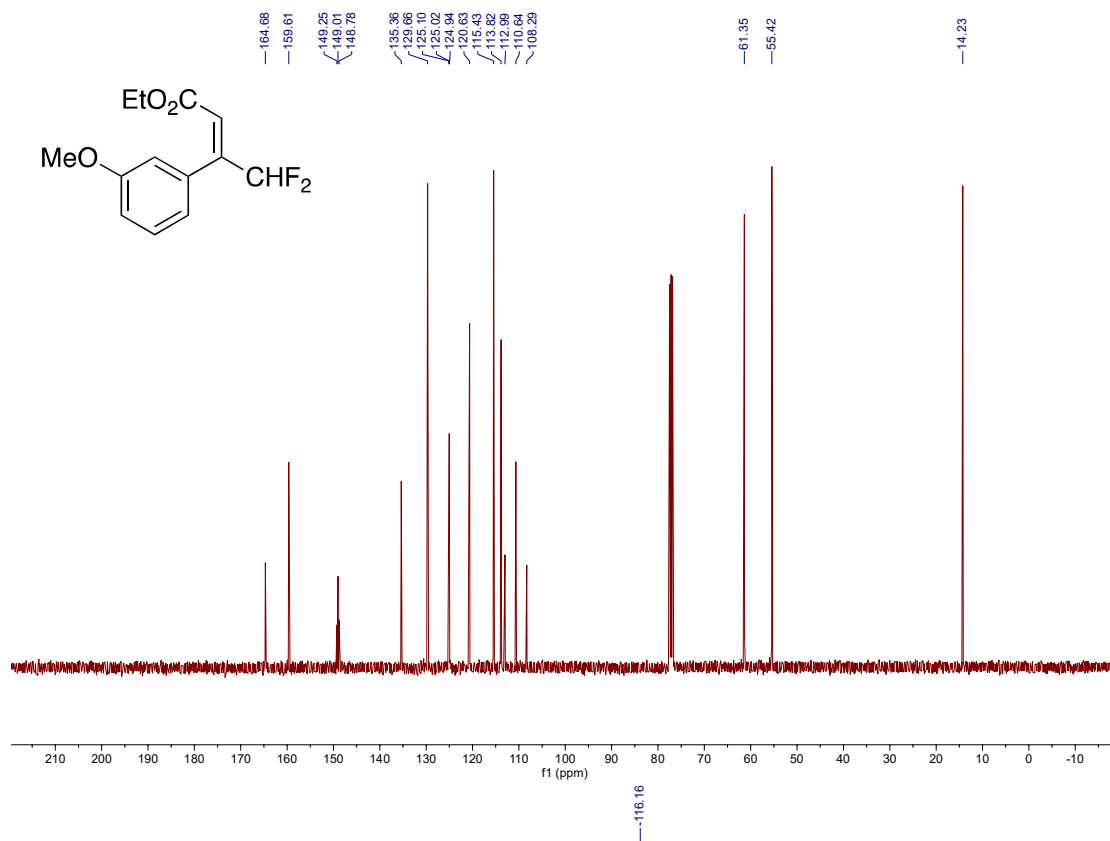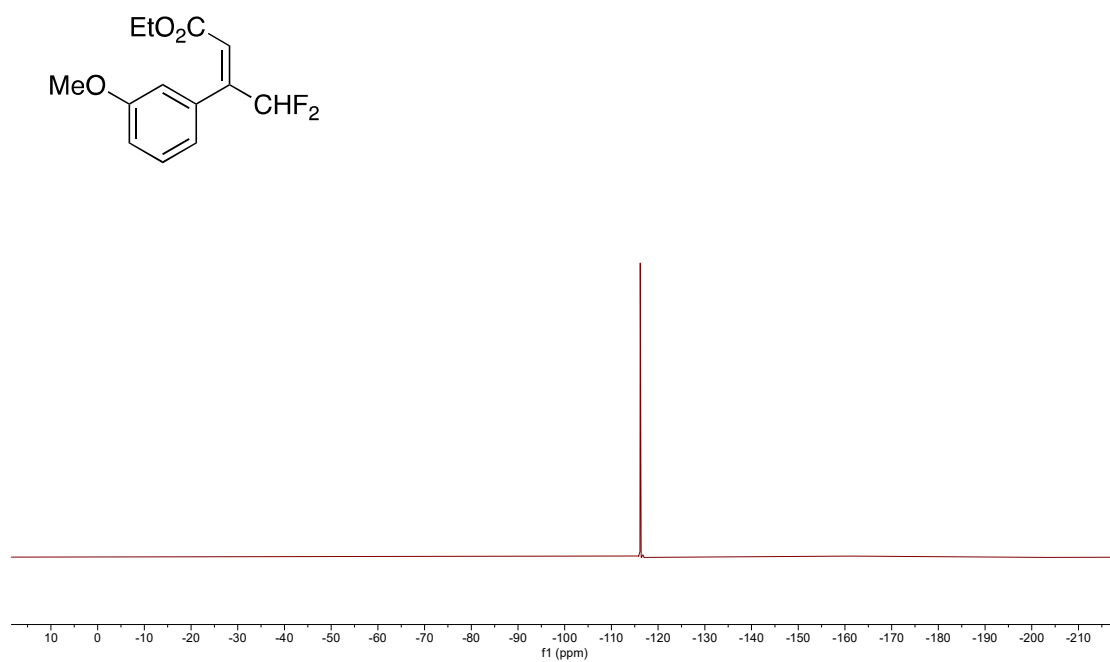

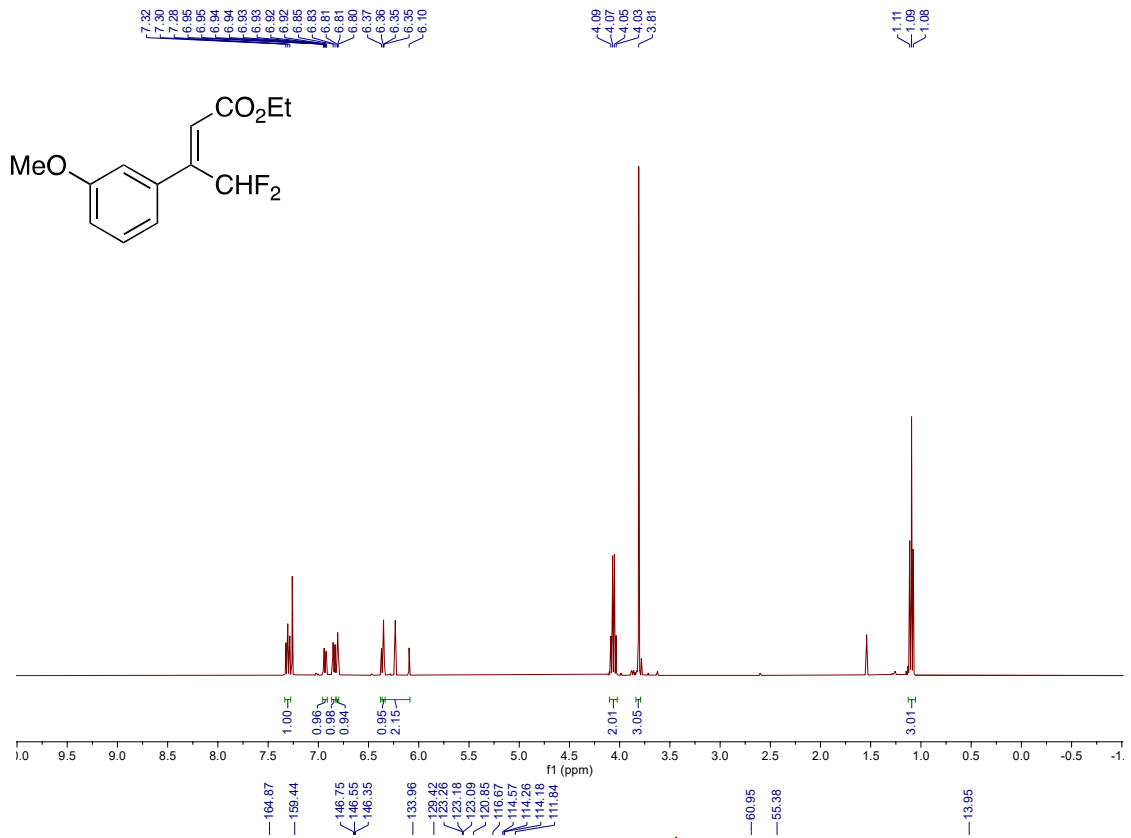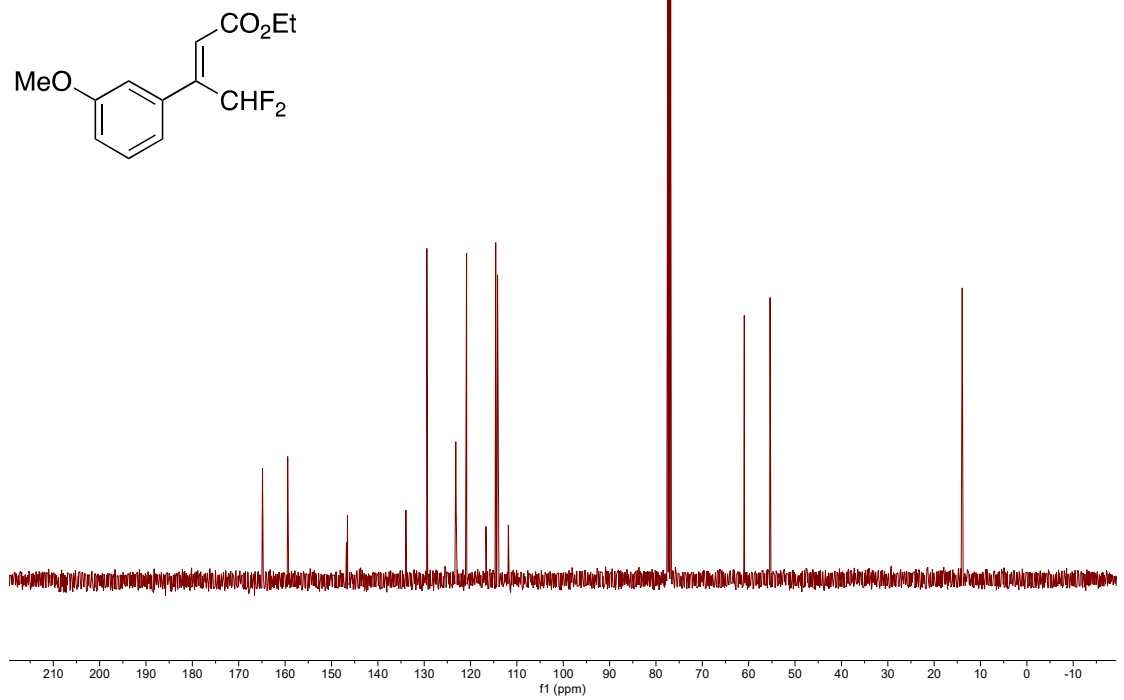

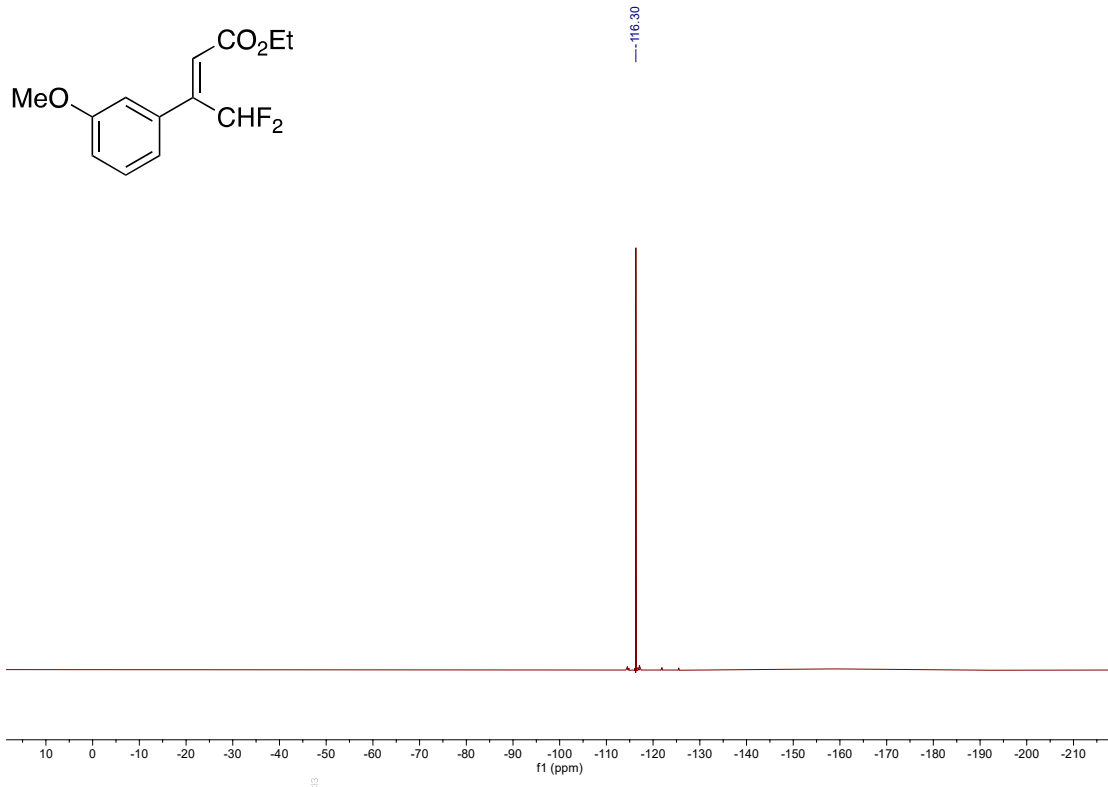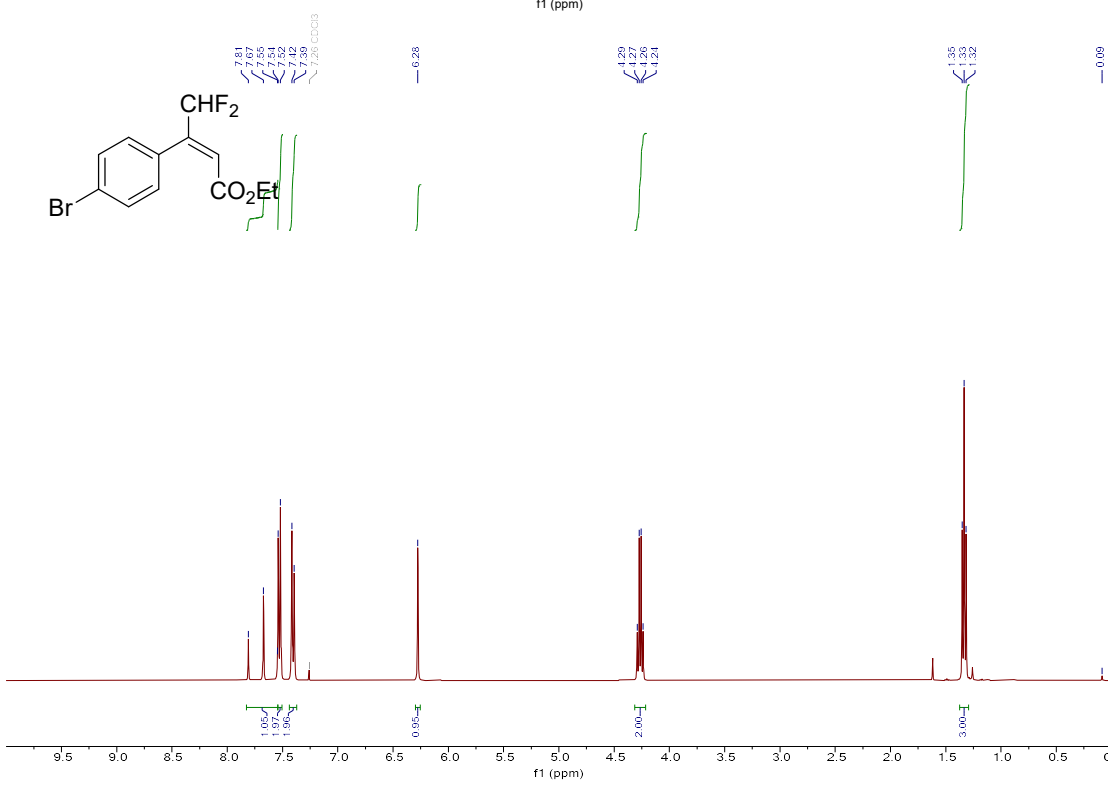

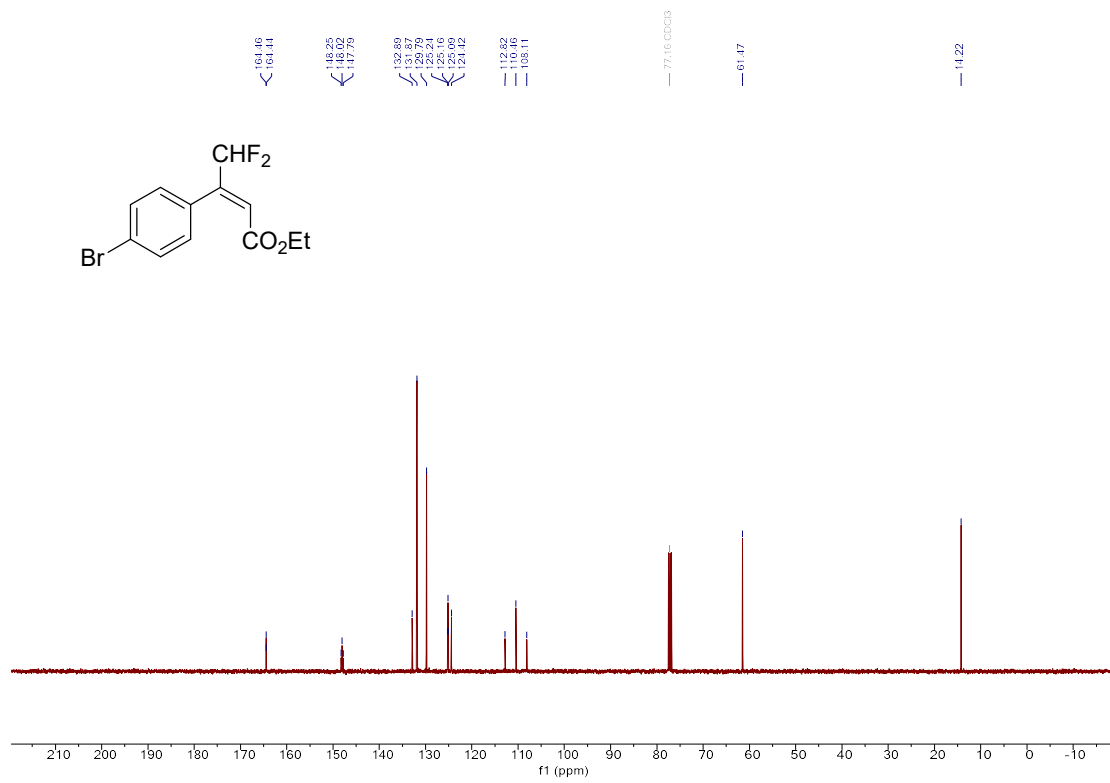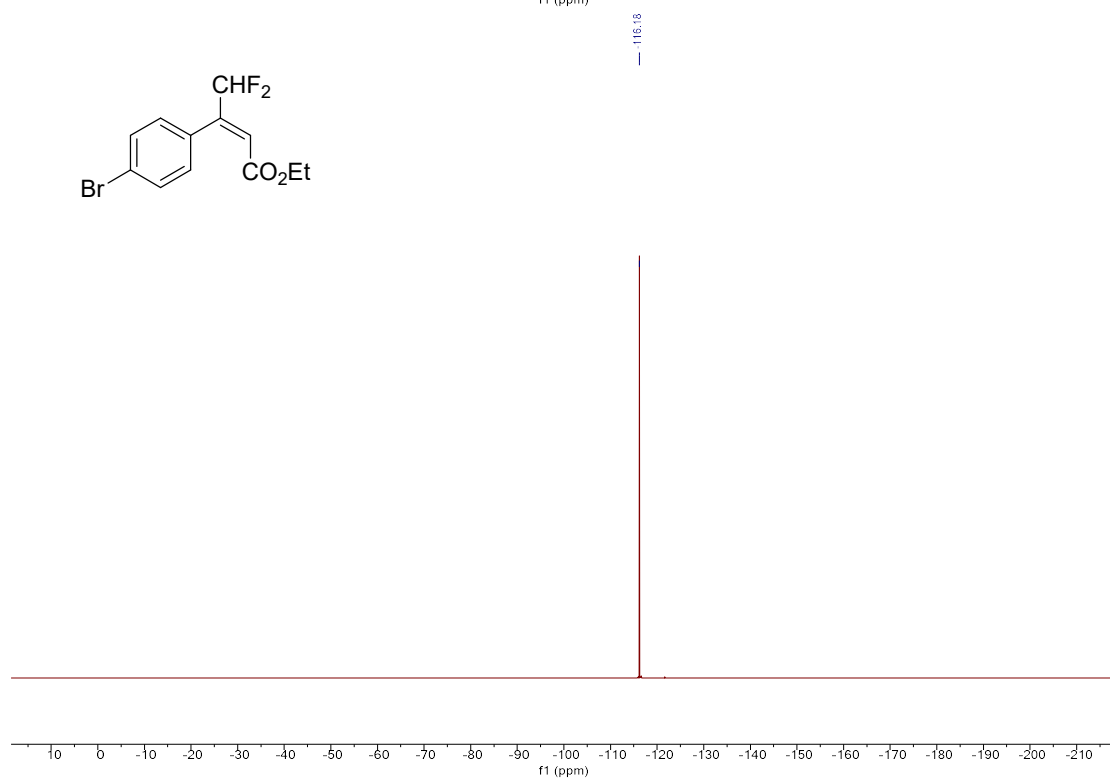

YJ-20201011-7-54-4-para-F.10.fid

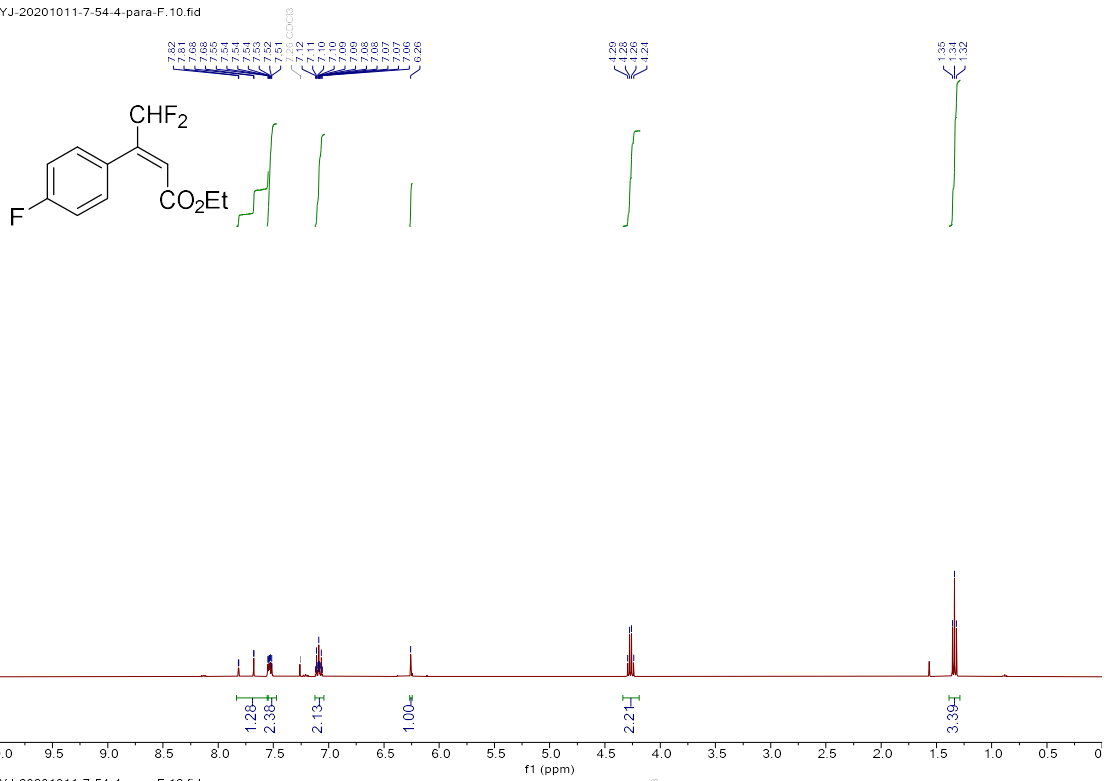

YJ-20201011-7-54-4-para-F.12.fid

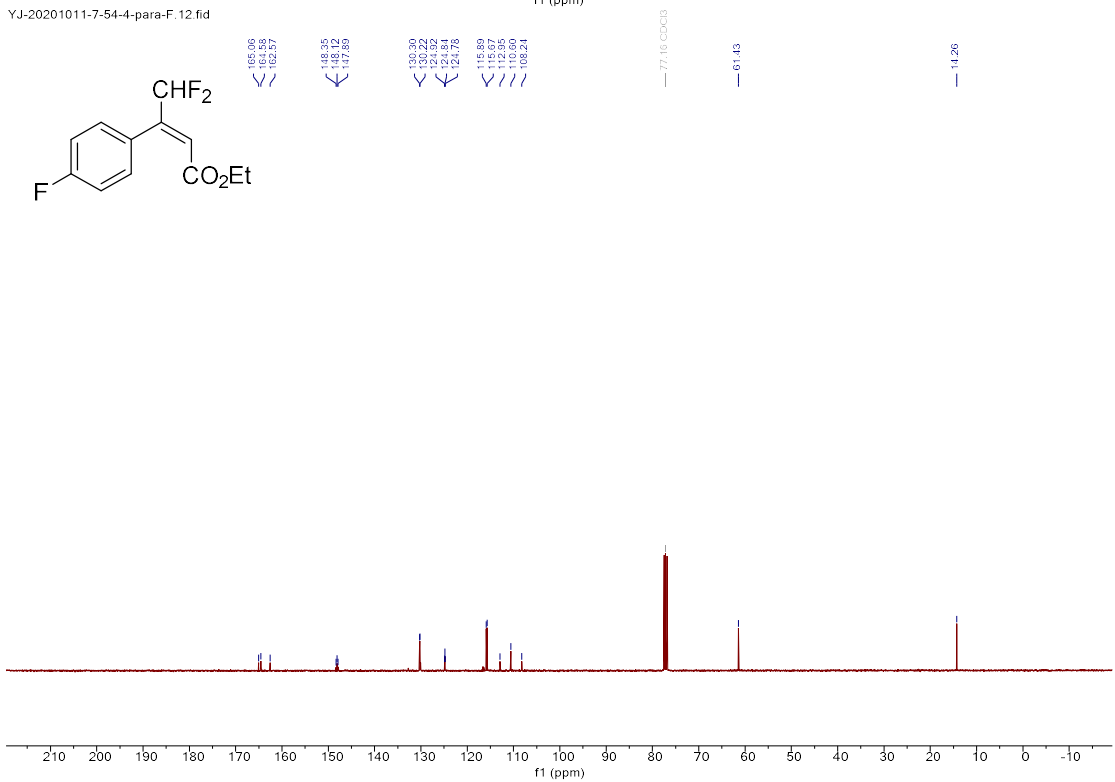

-111.02  
-116.32

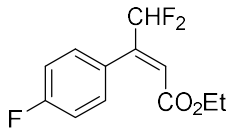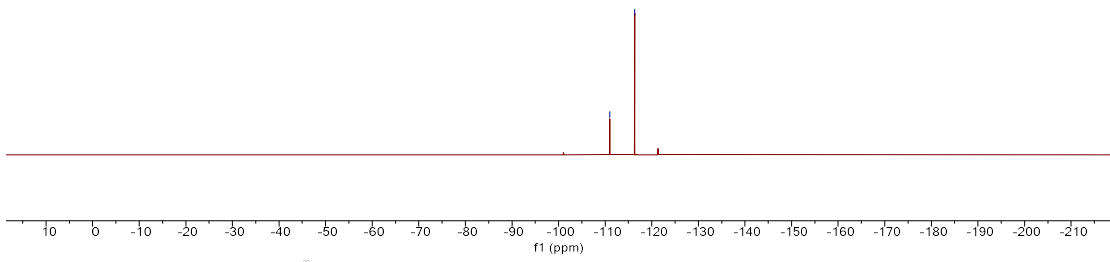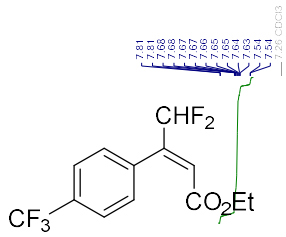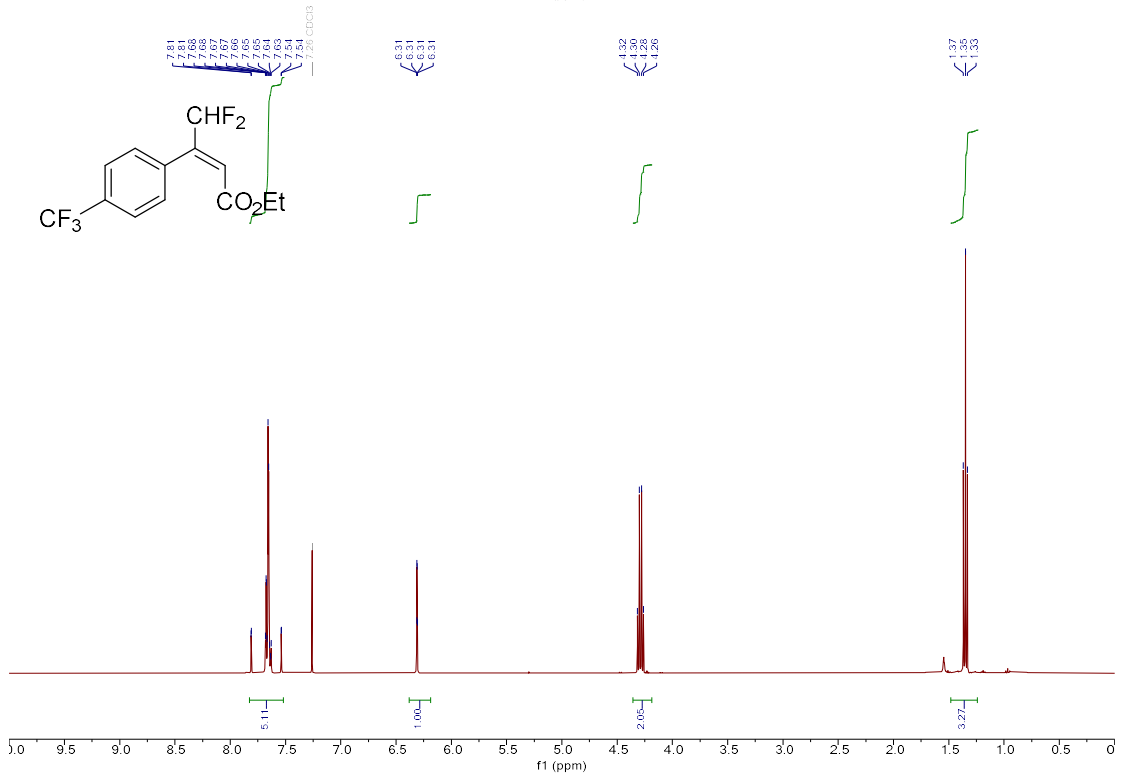

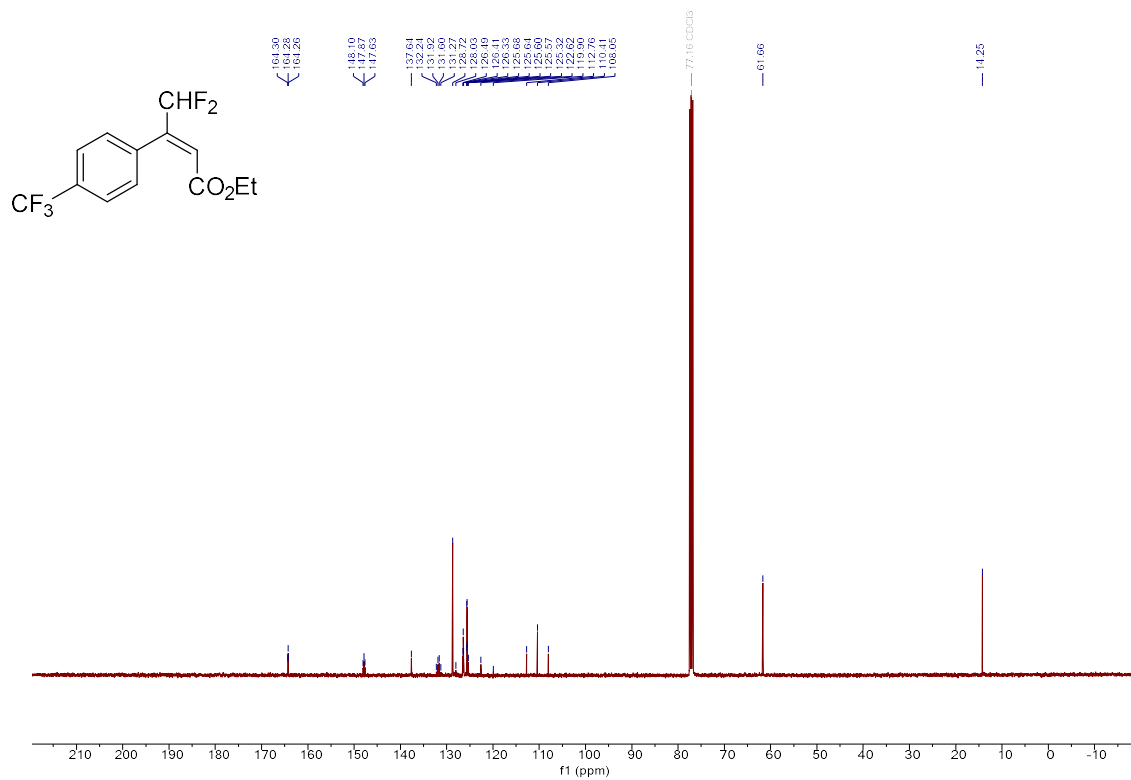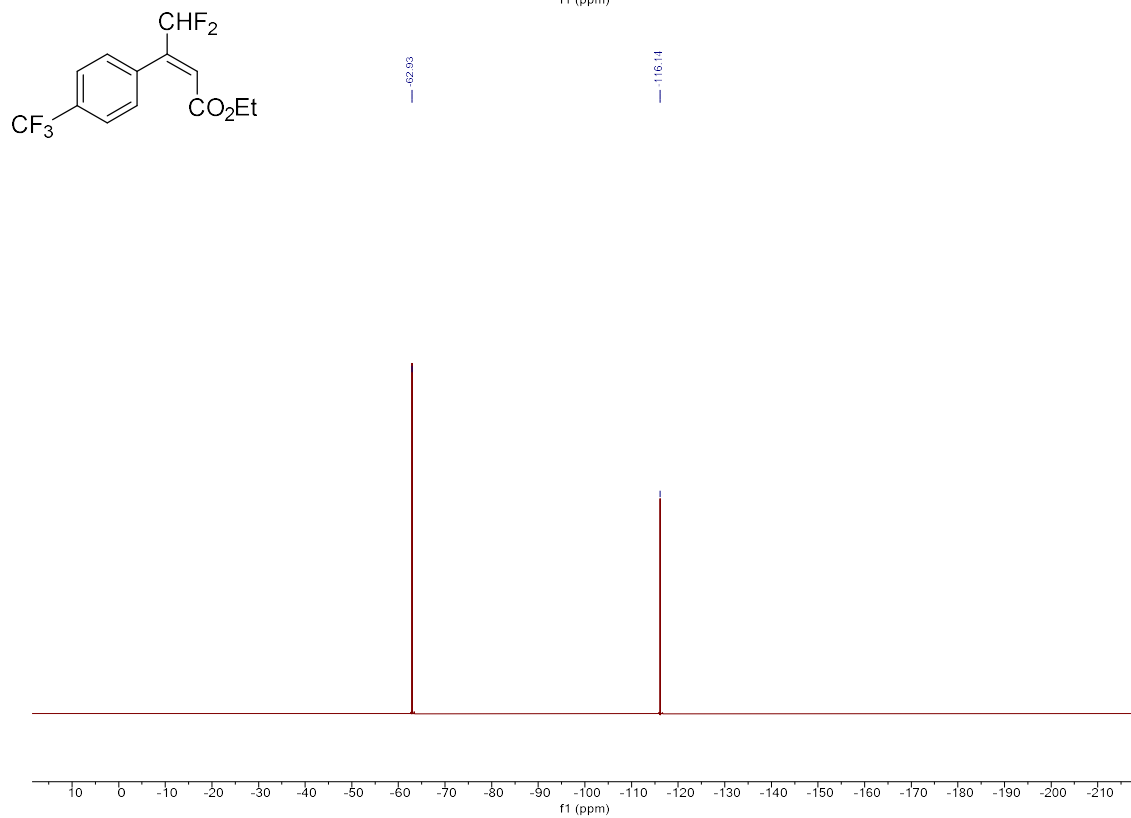



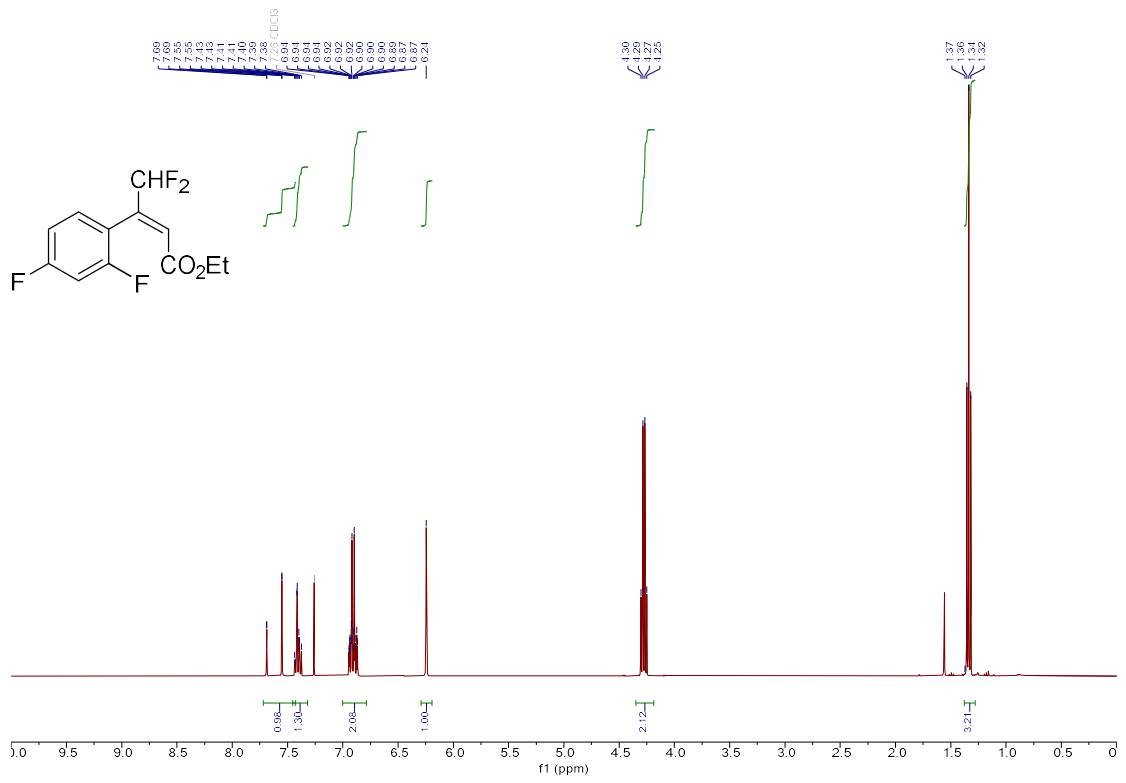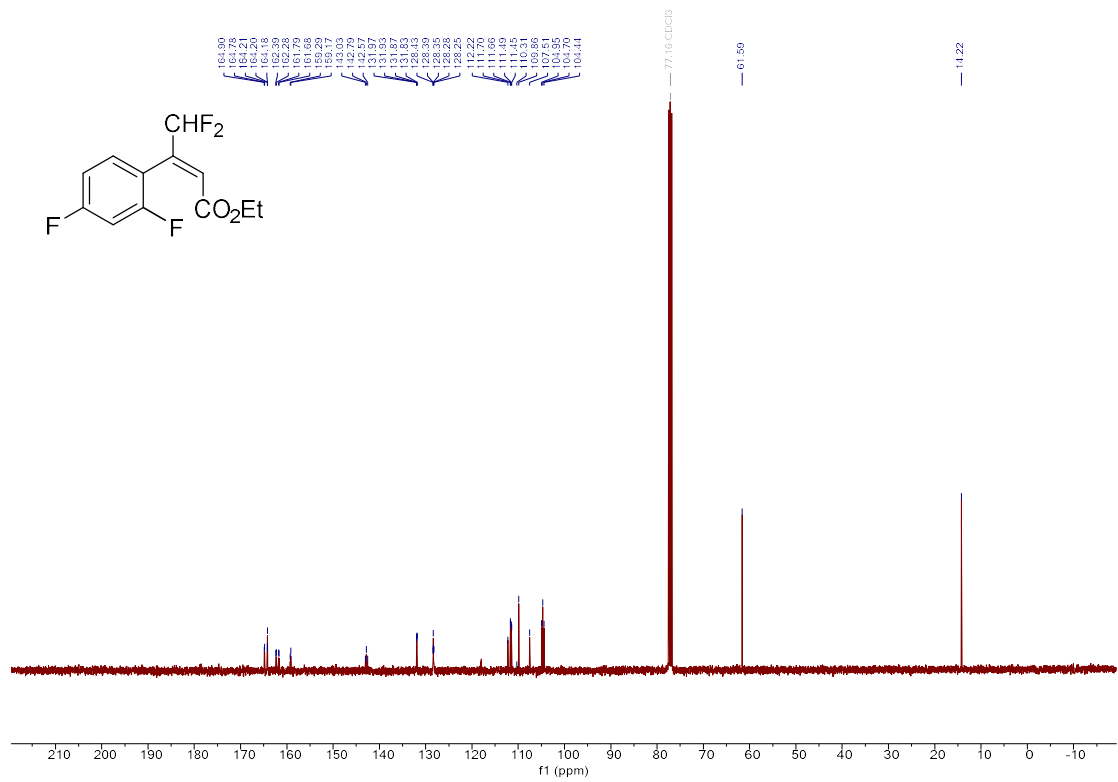



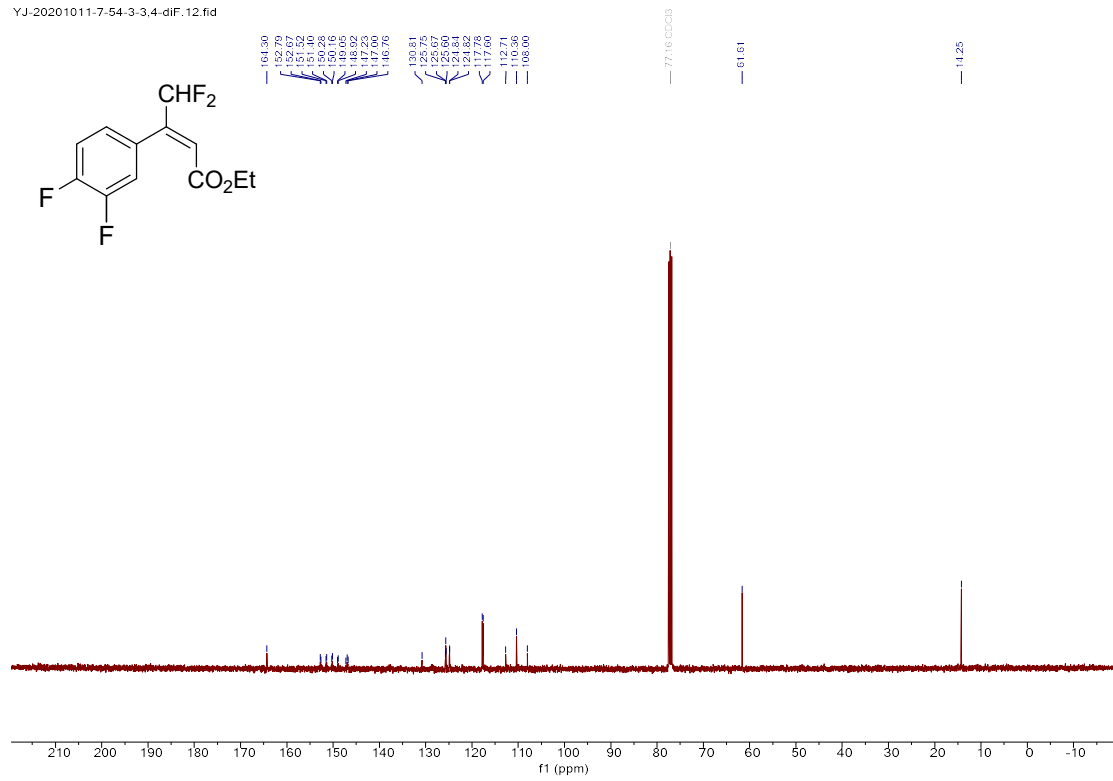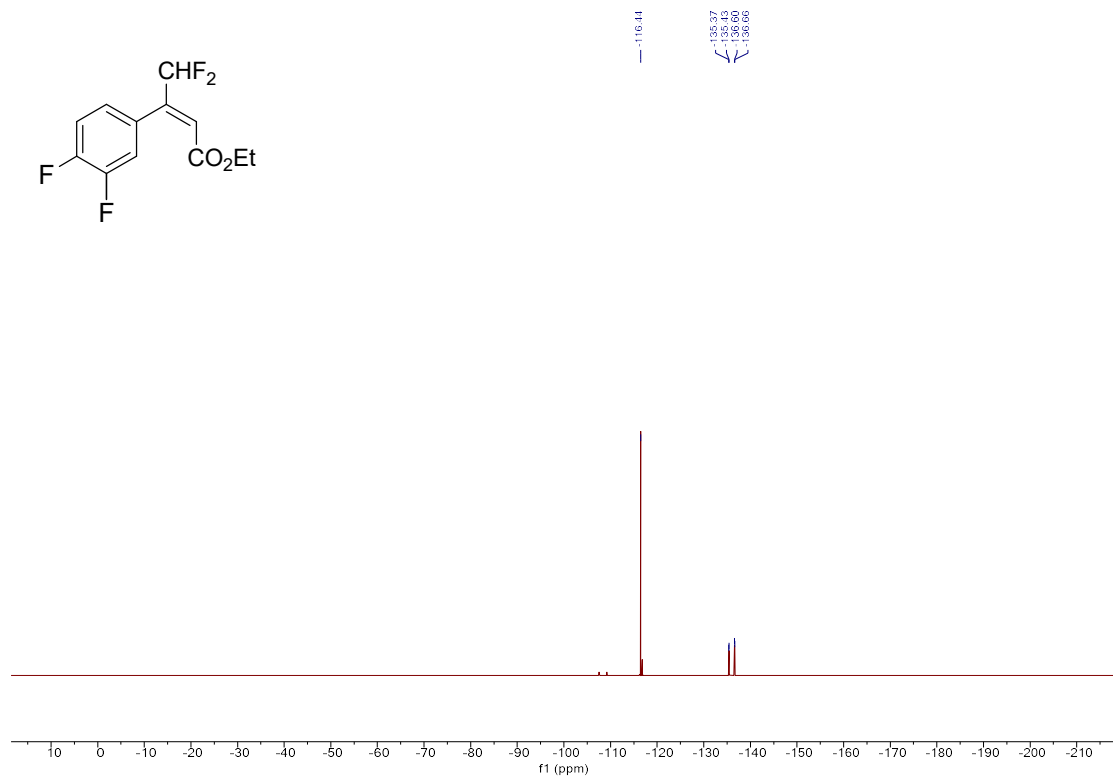

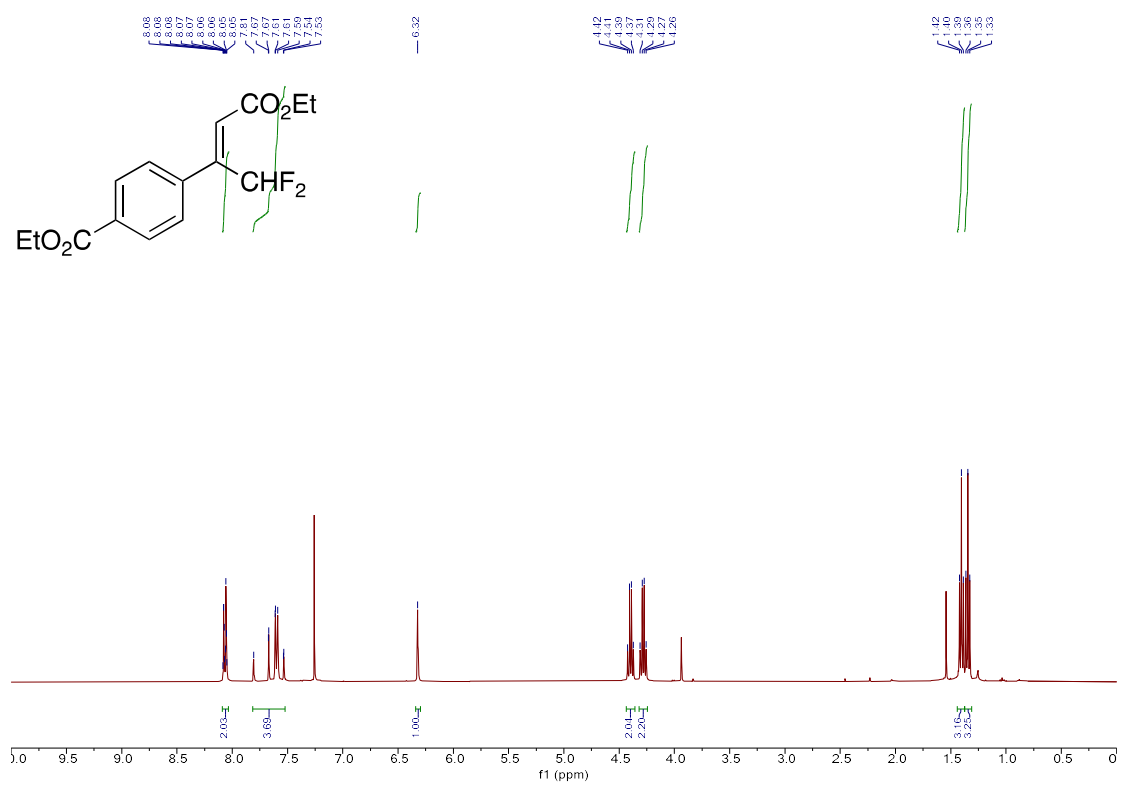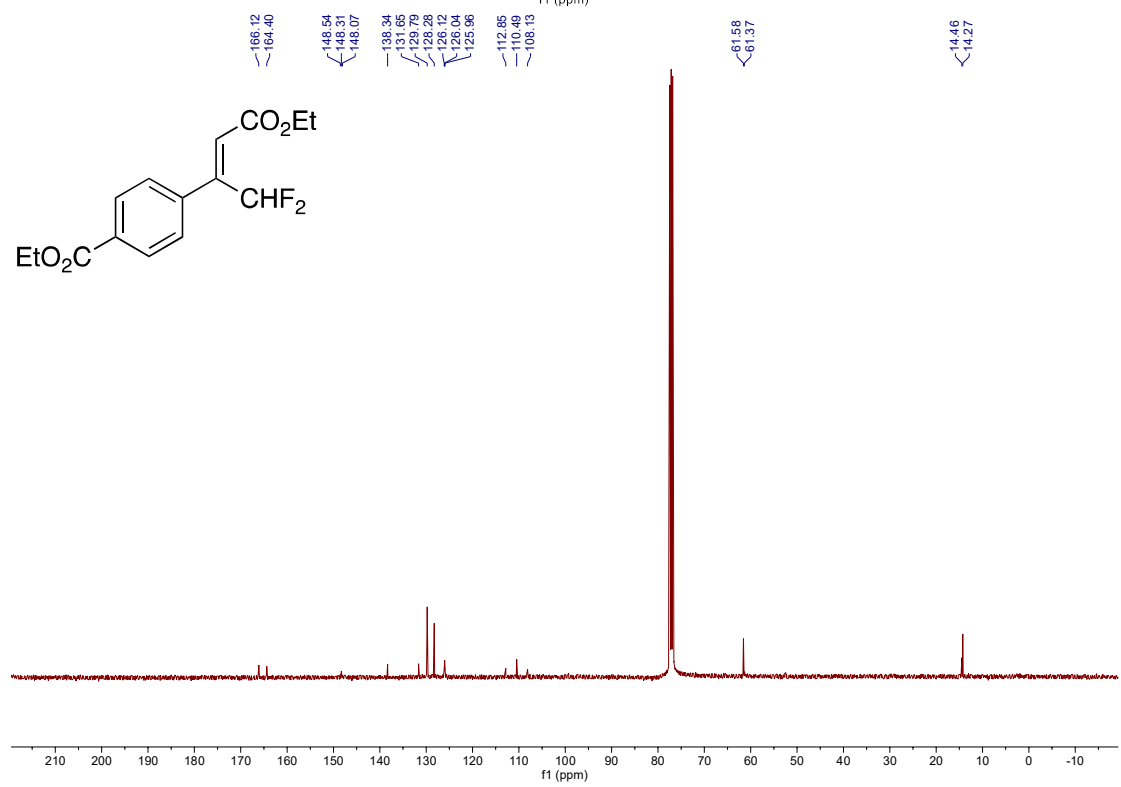

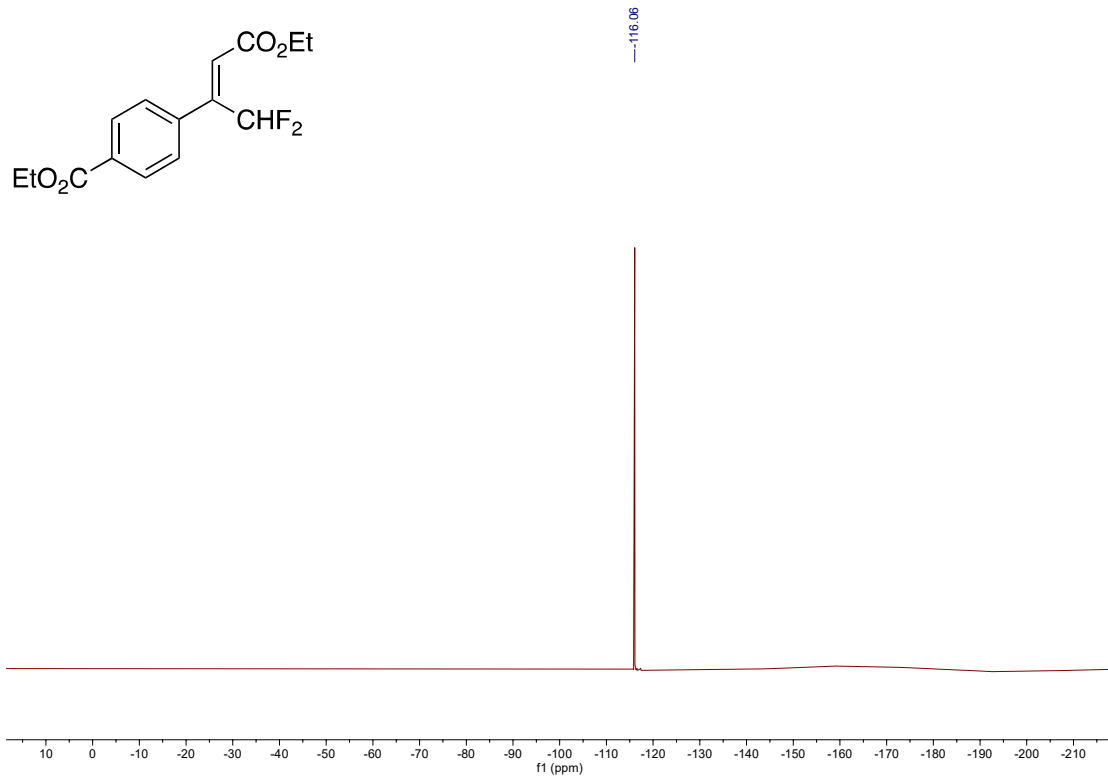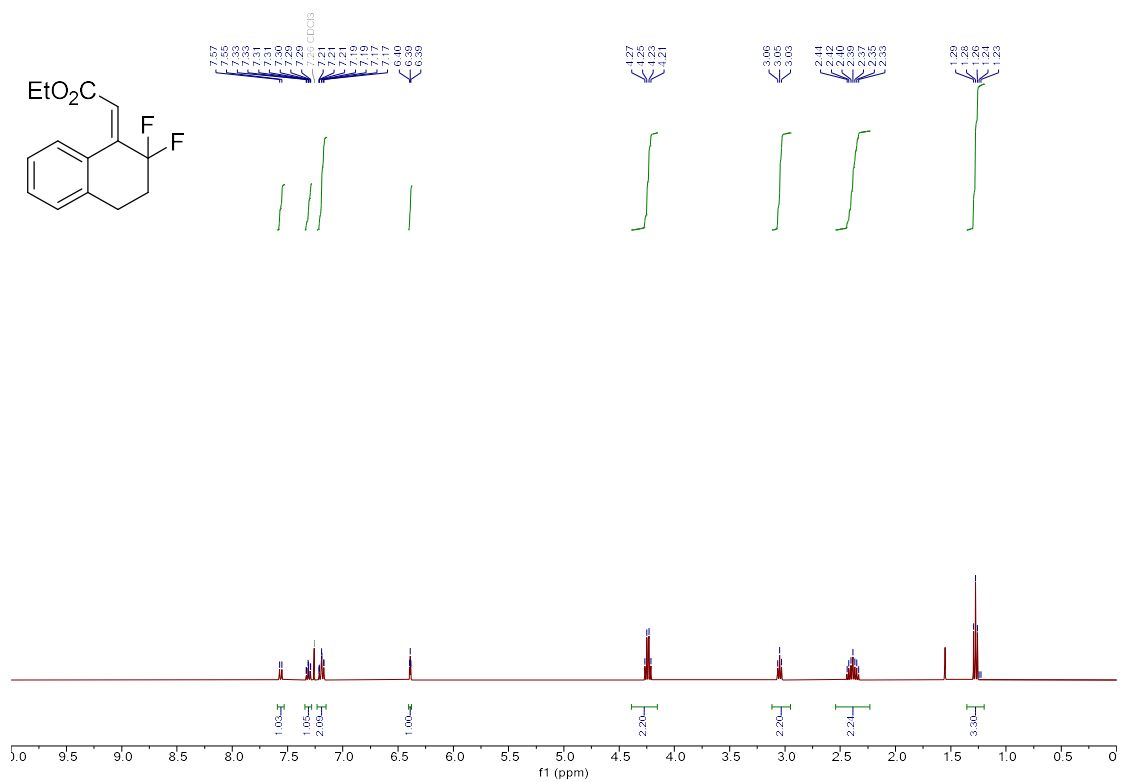



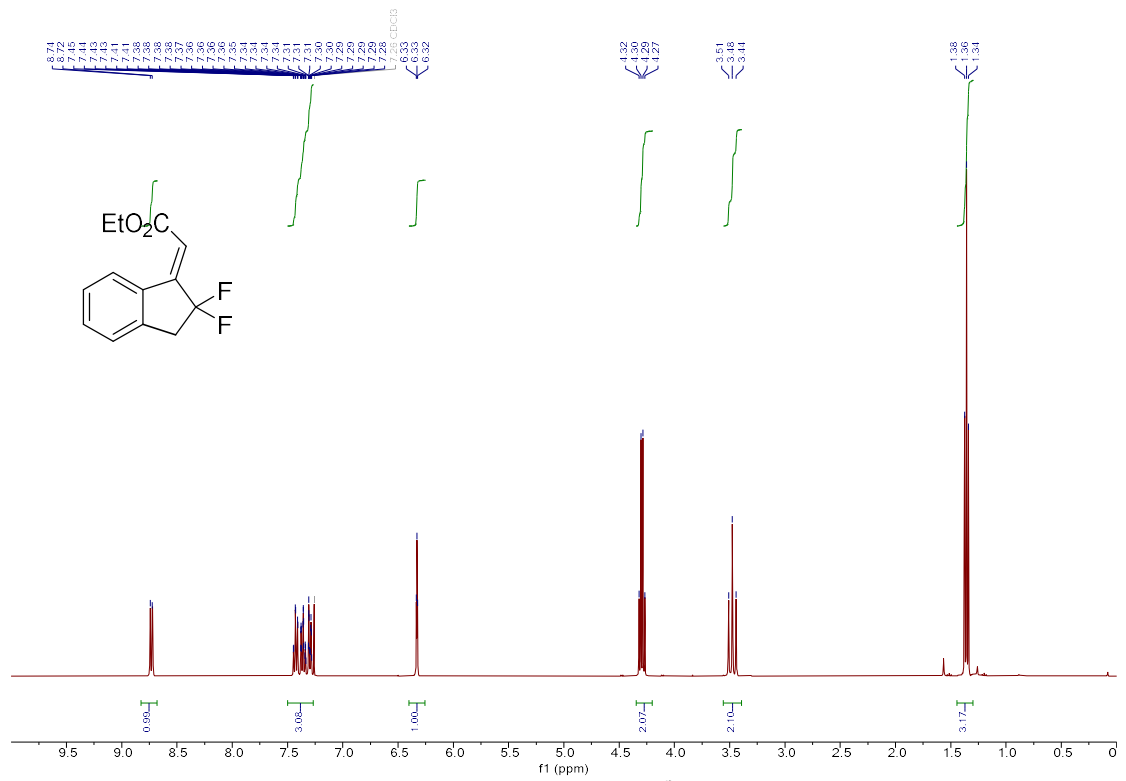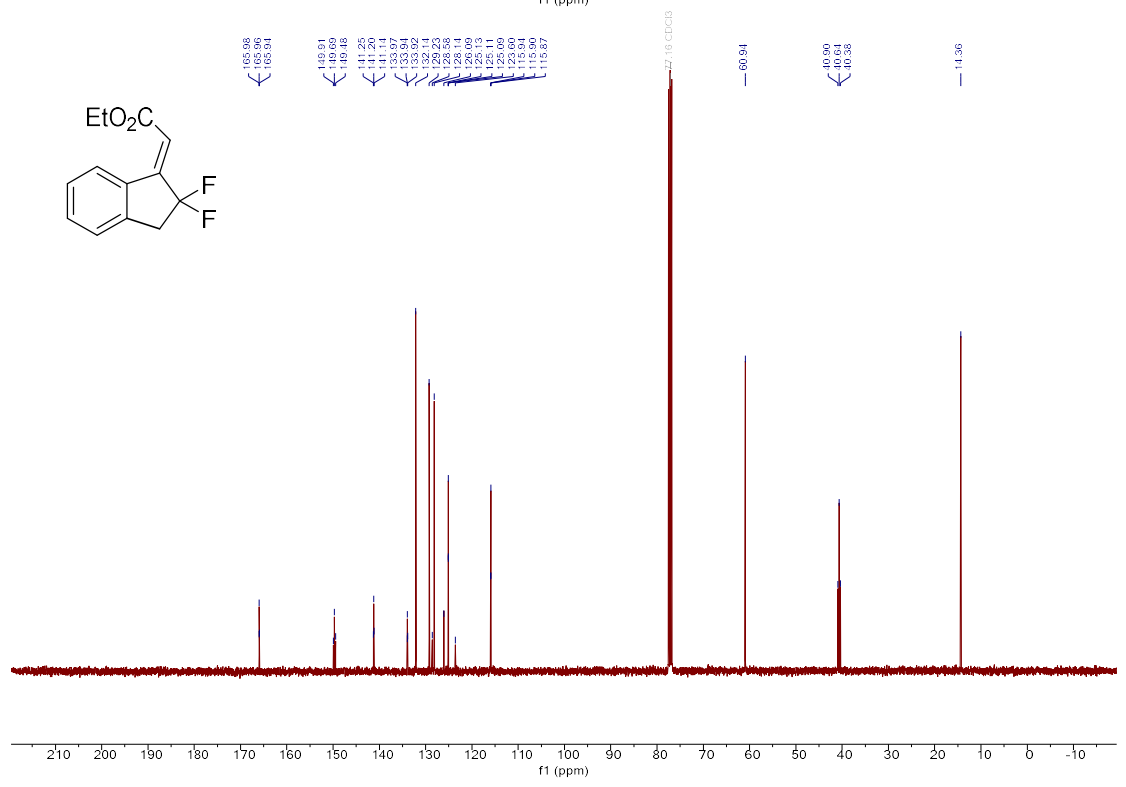

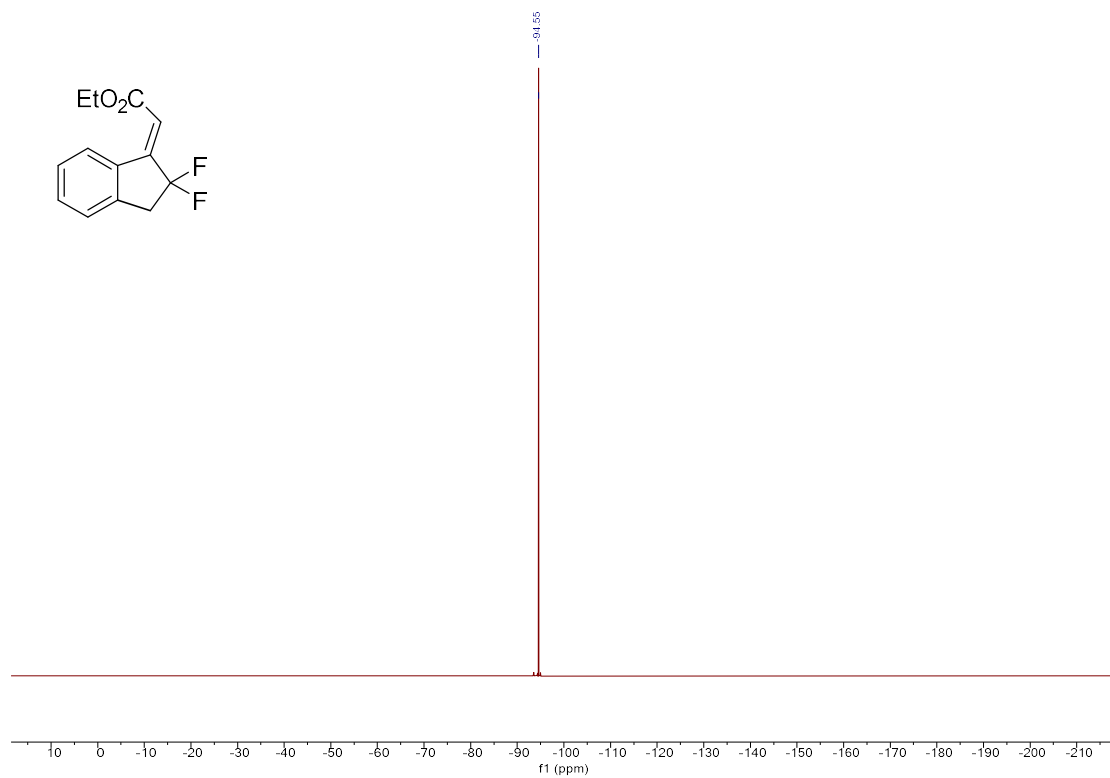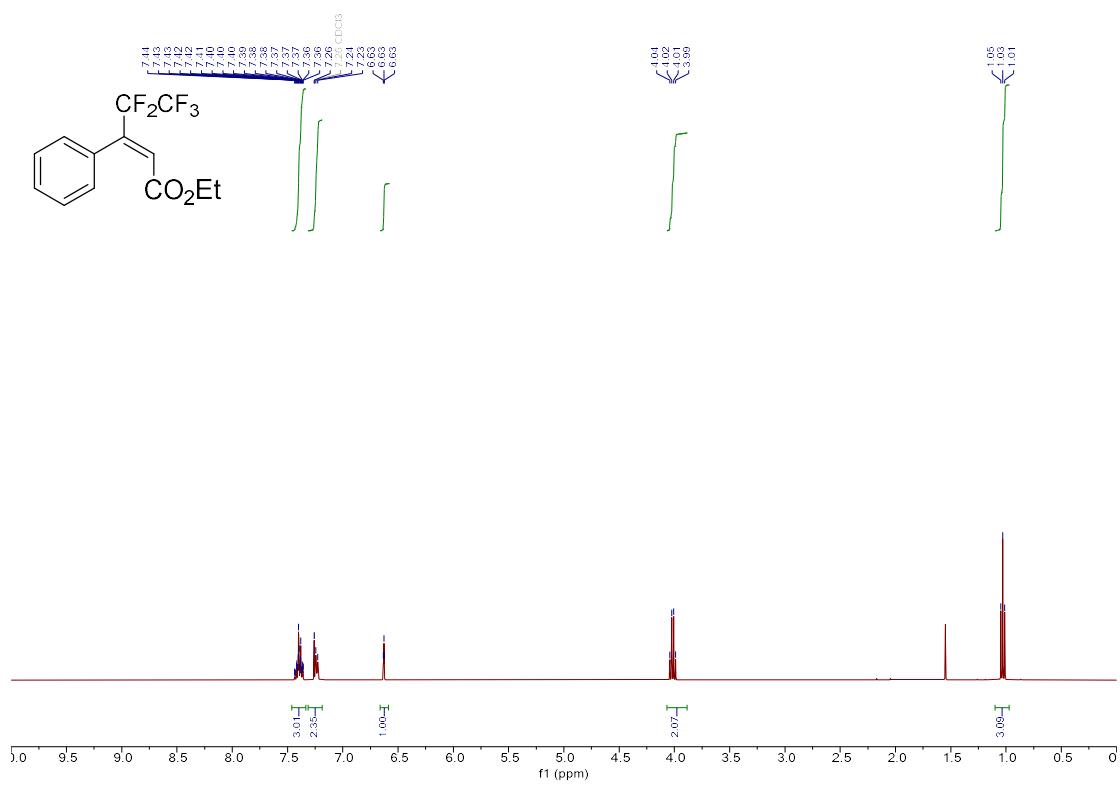



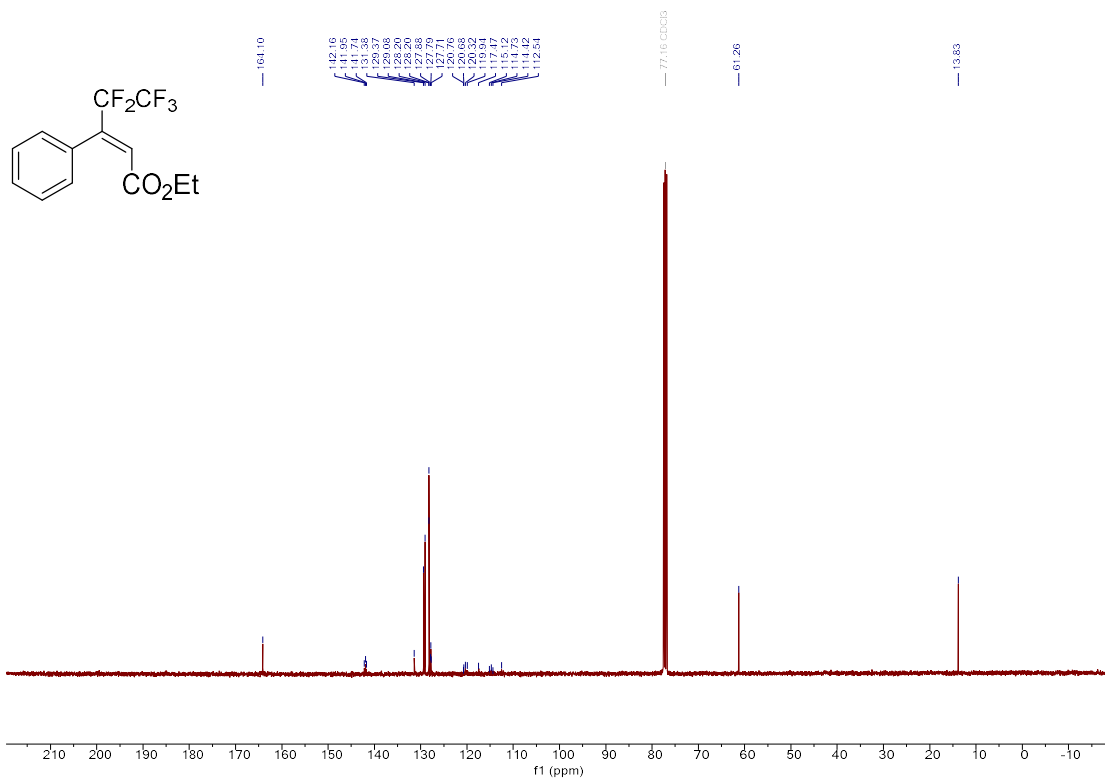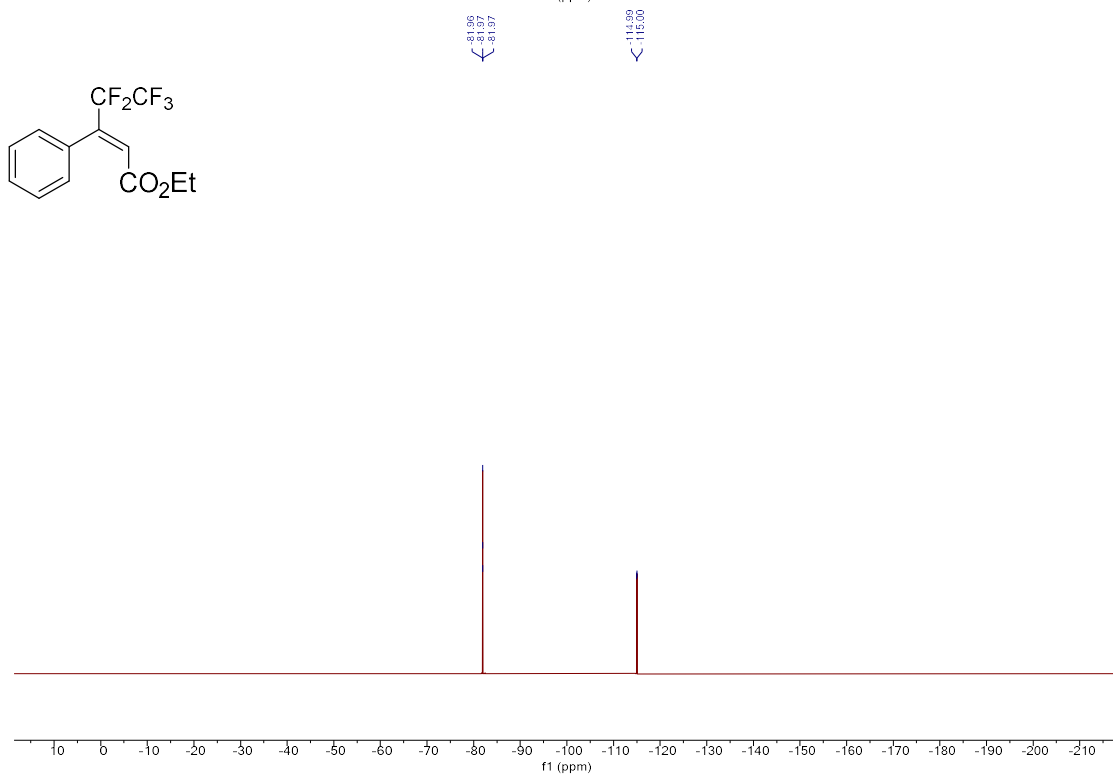



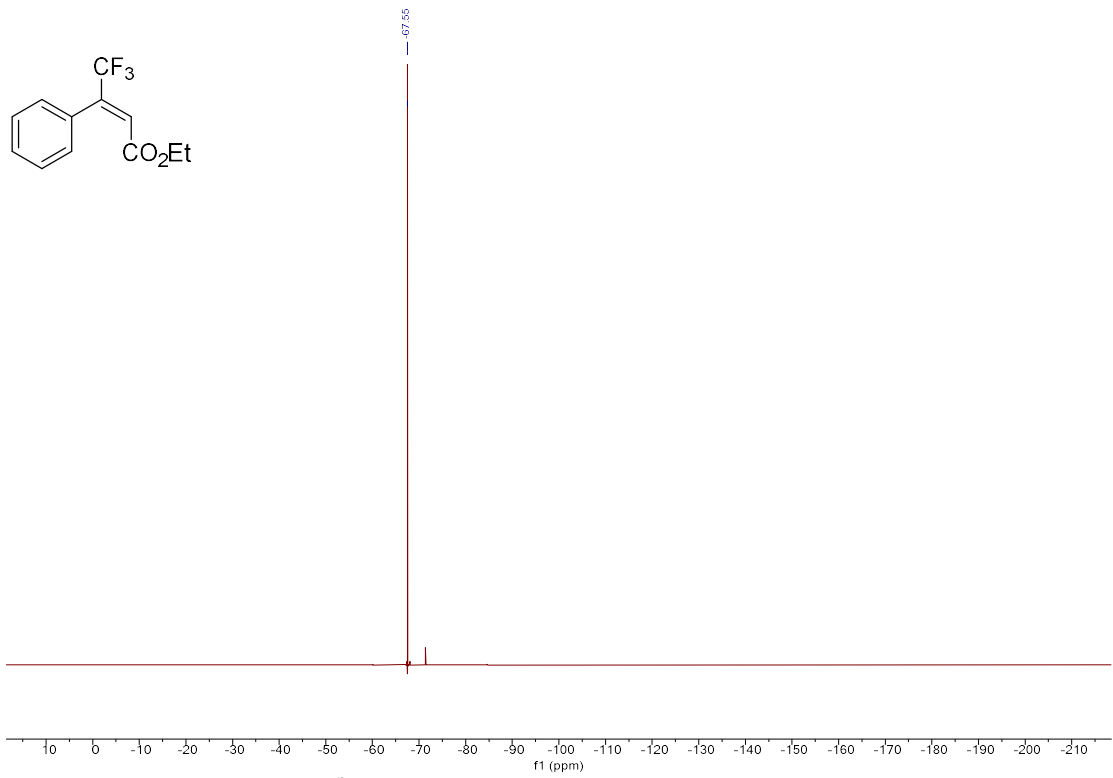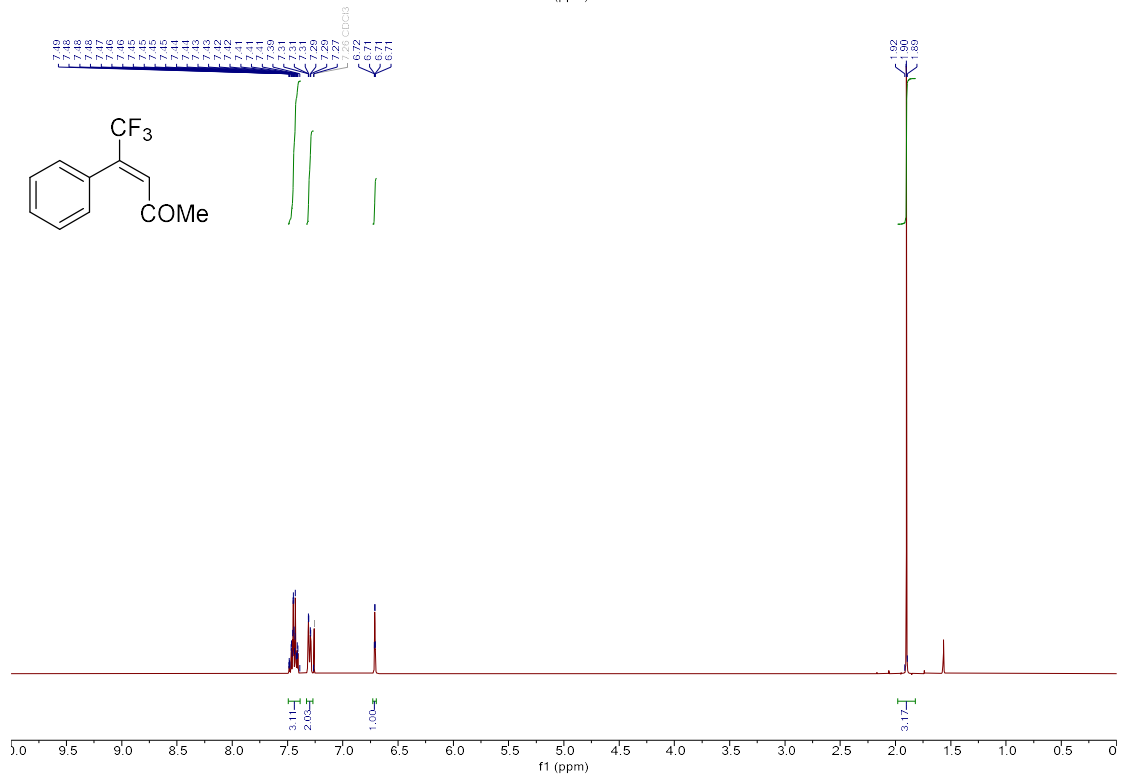

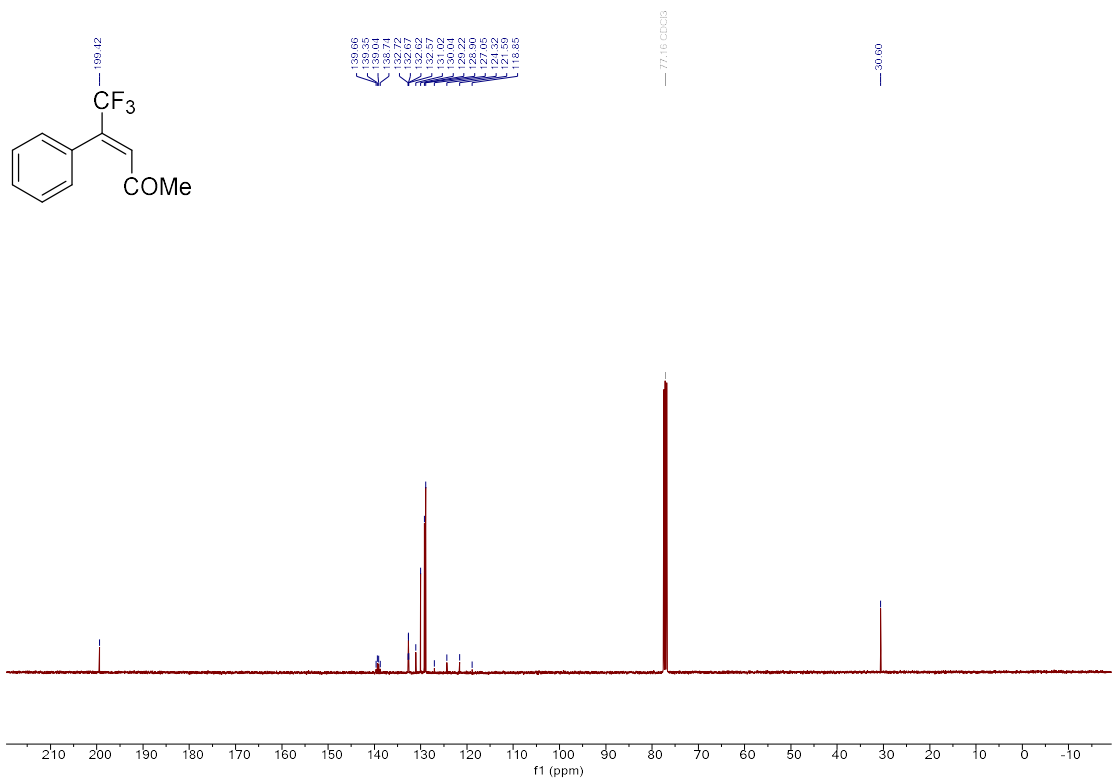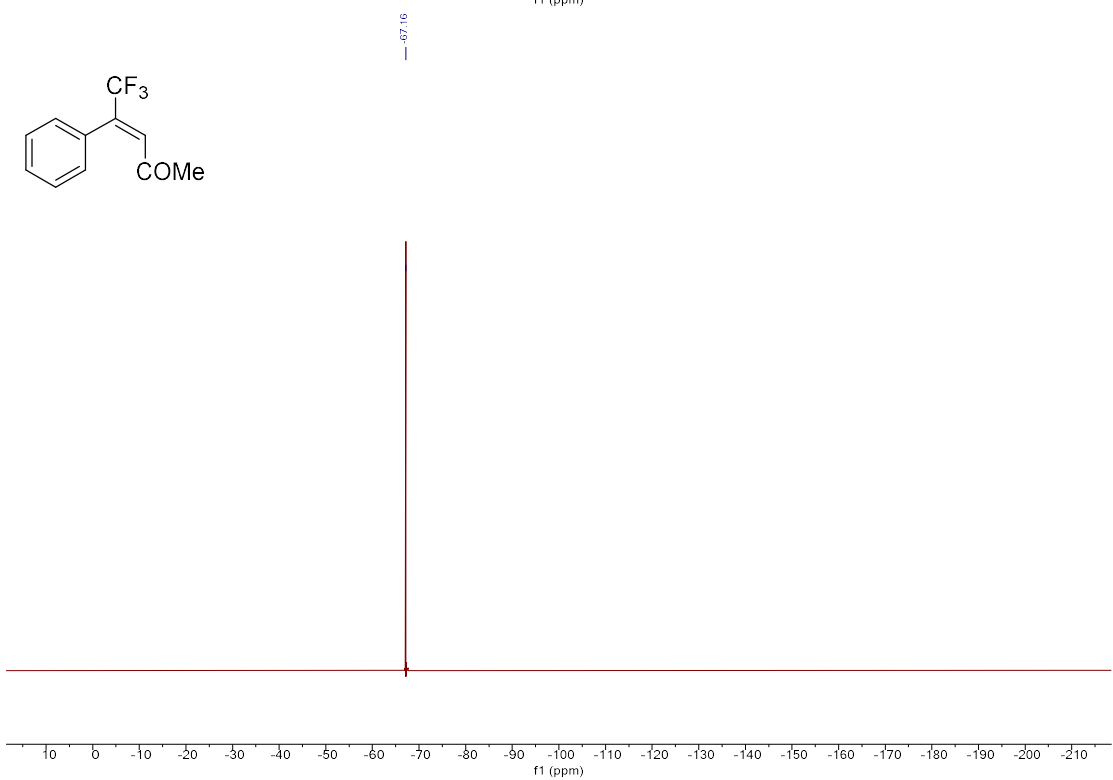

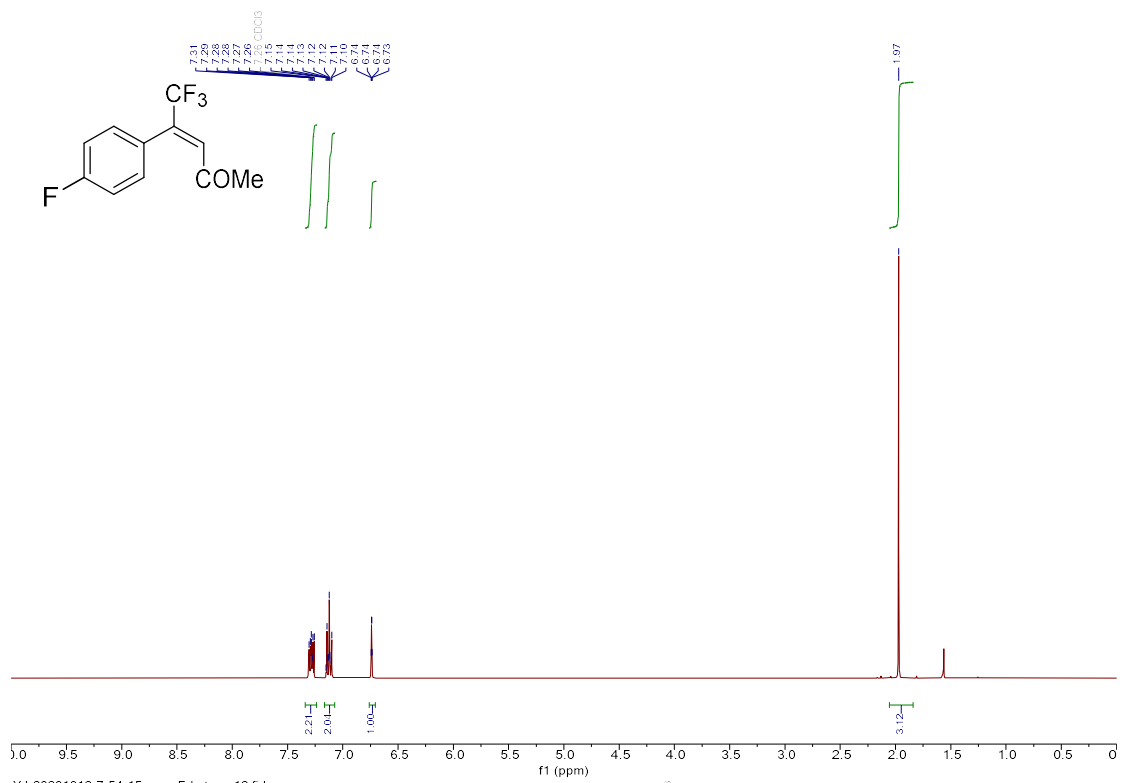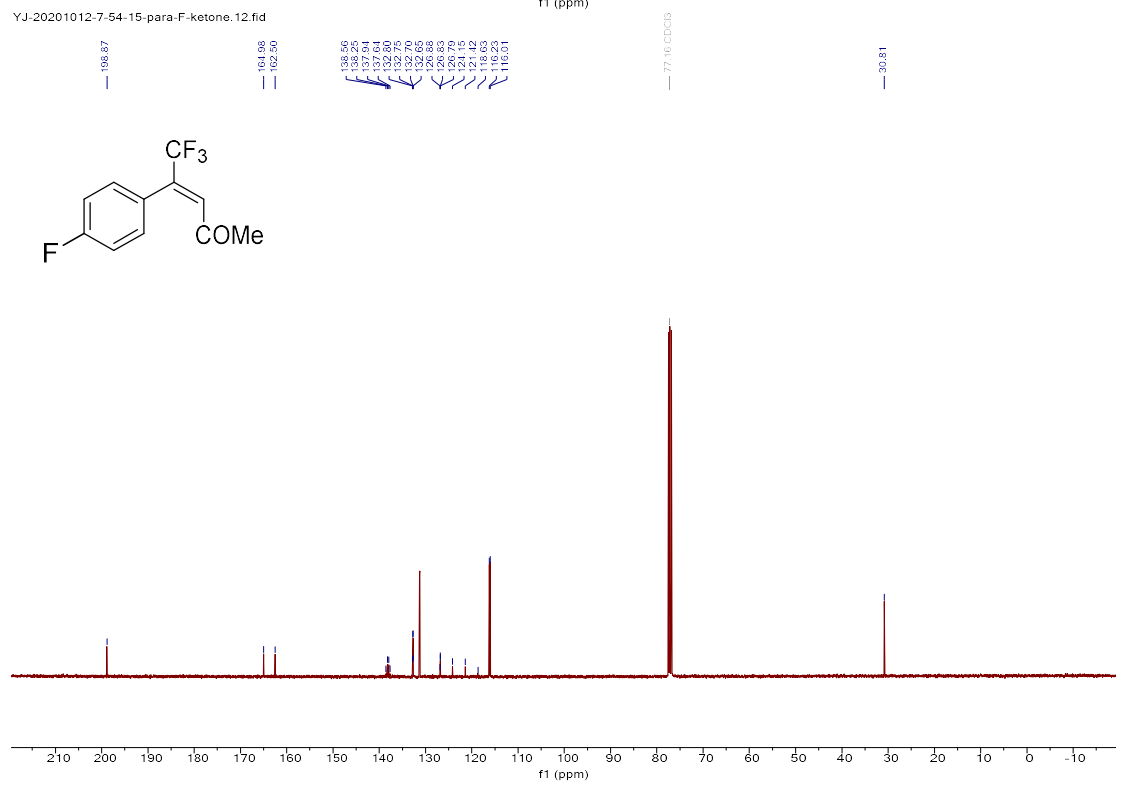

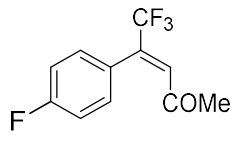

67.32  
67.33

110.46  
110.48

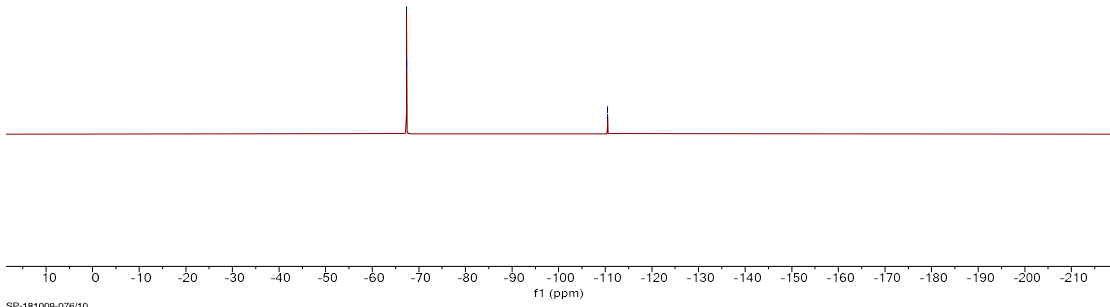

SP-181009-076/10

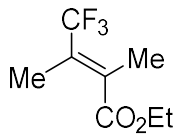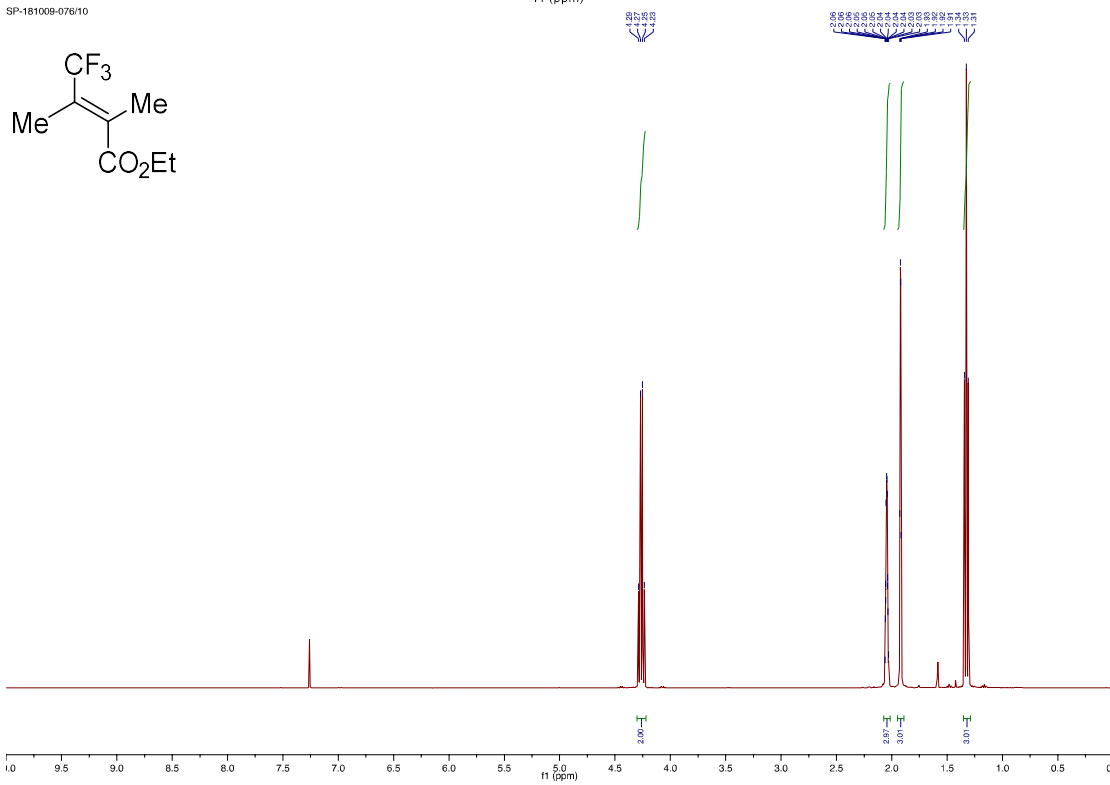









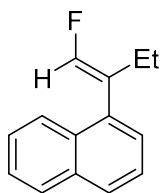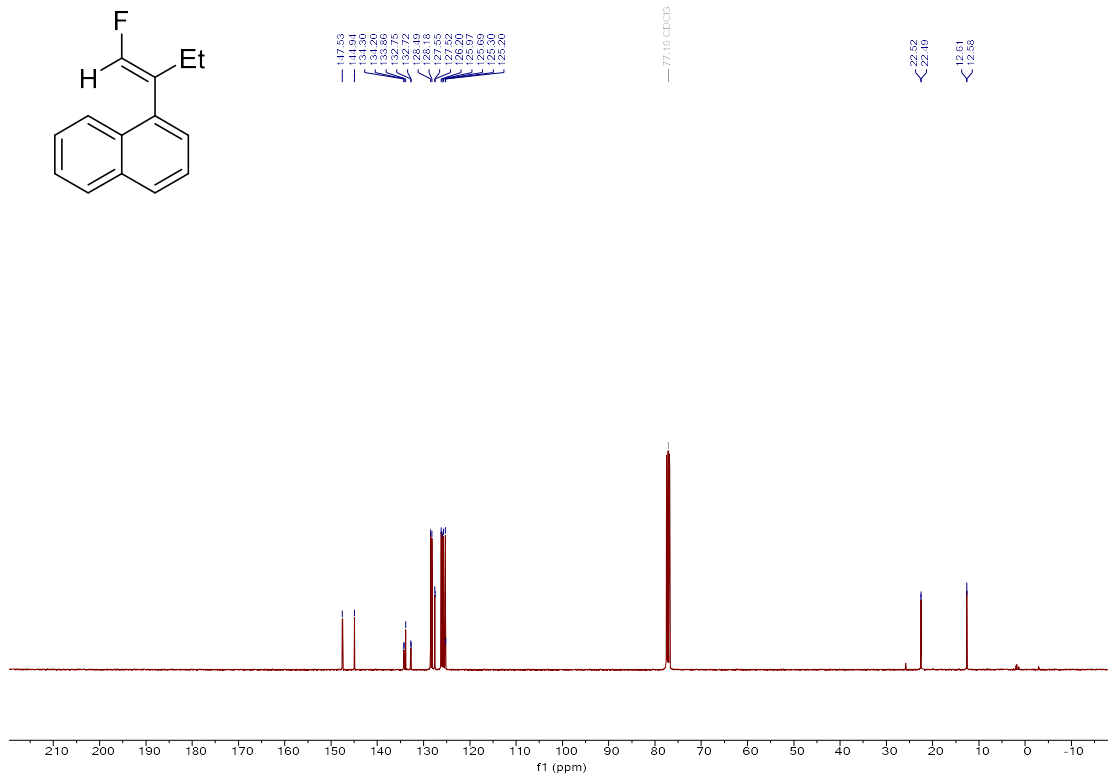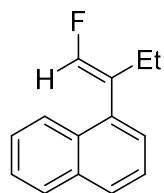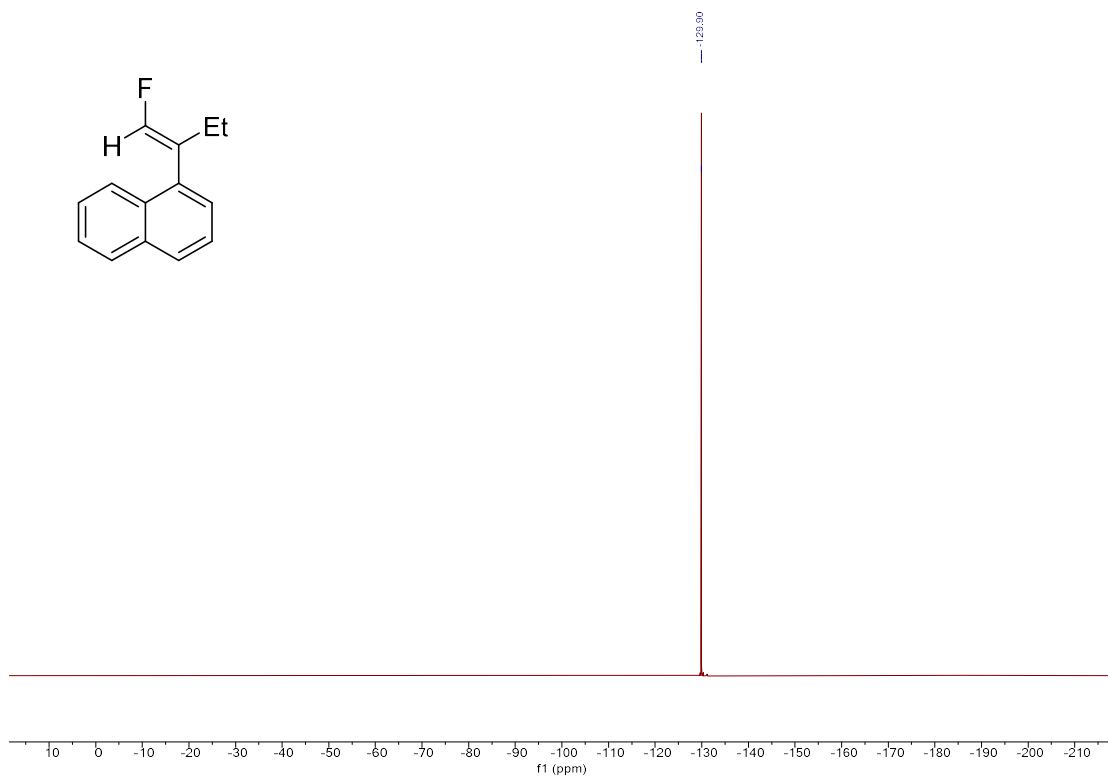

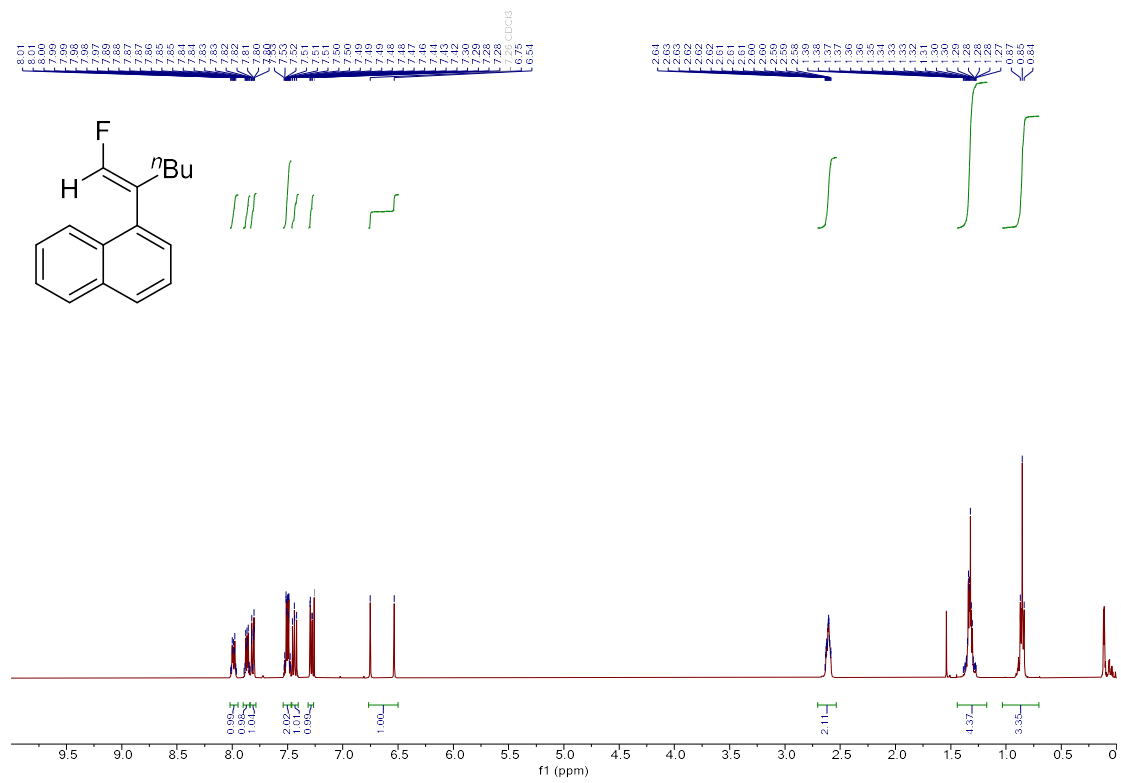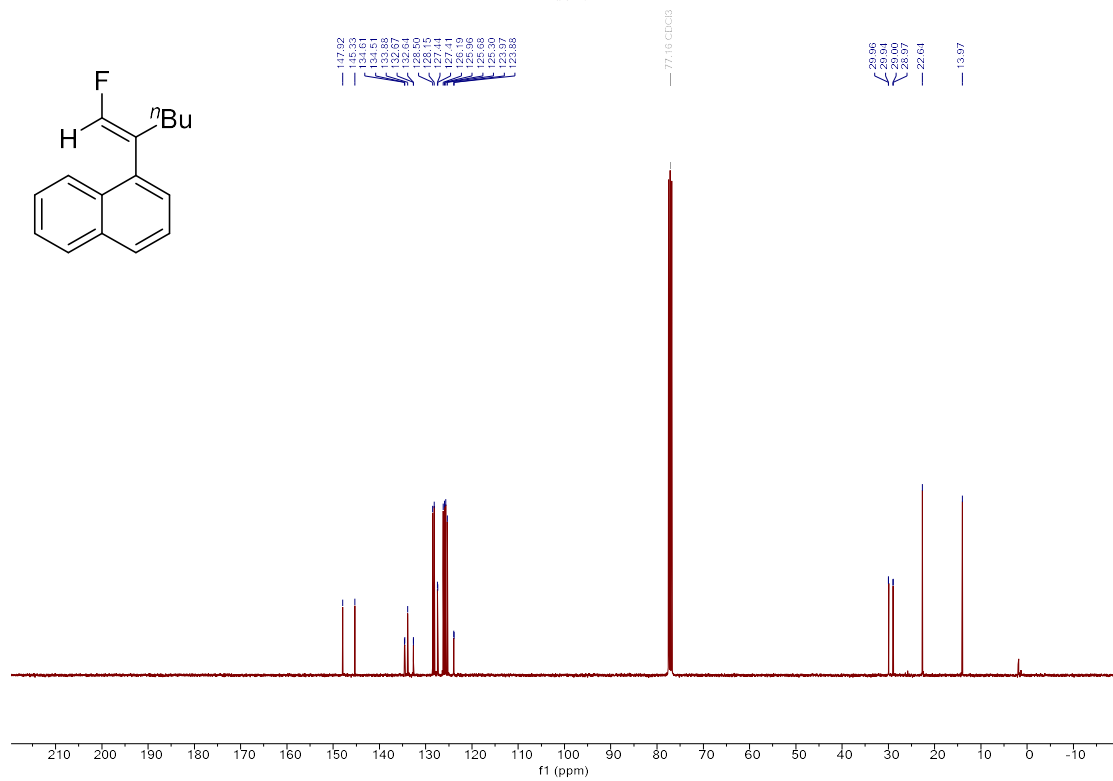

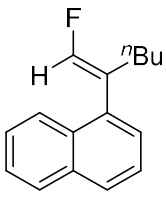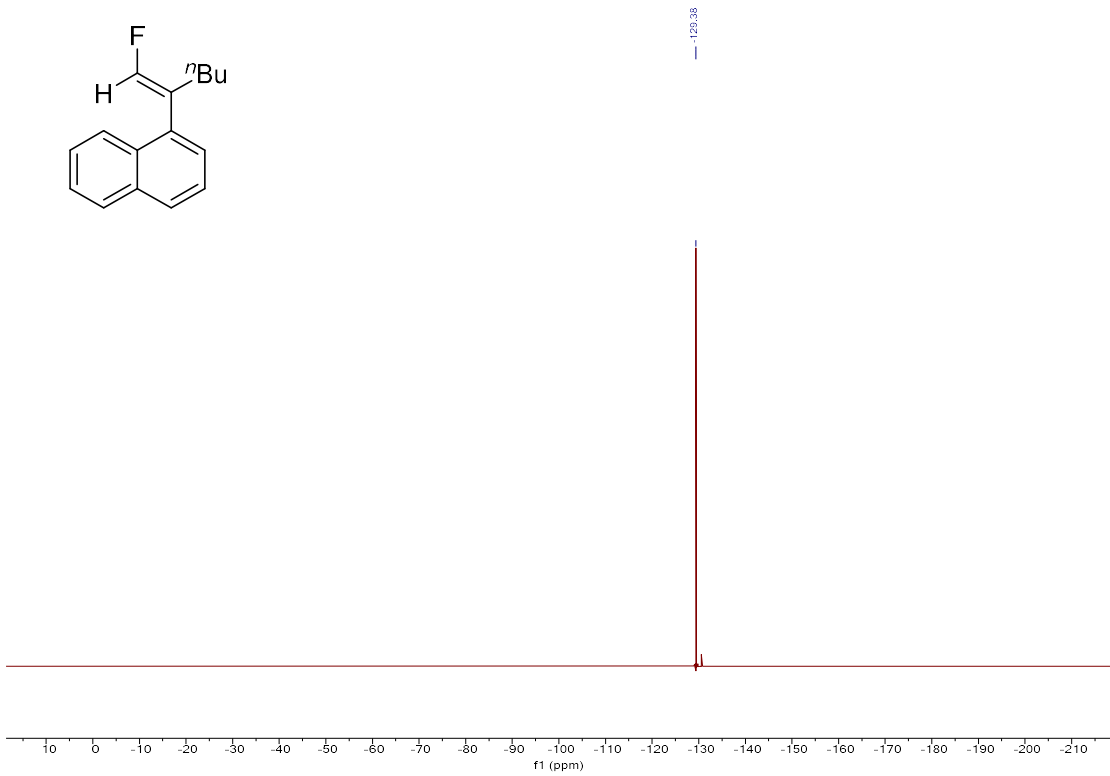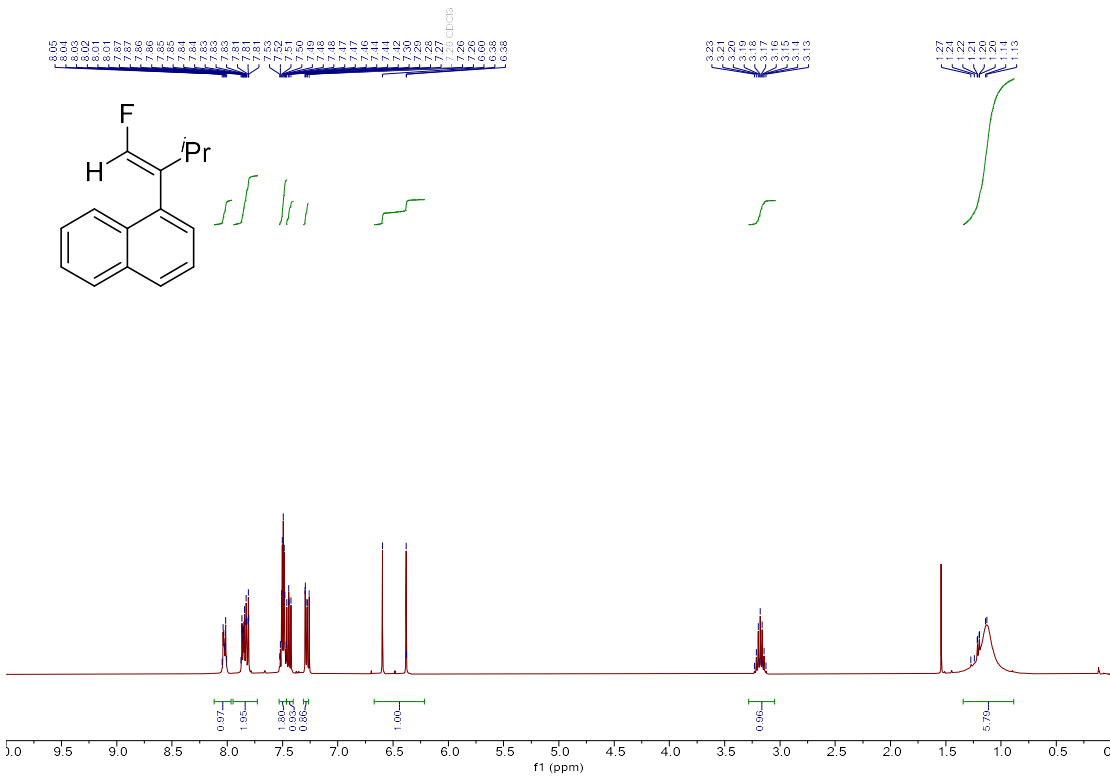

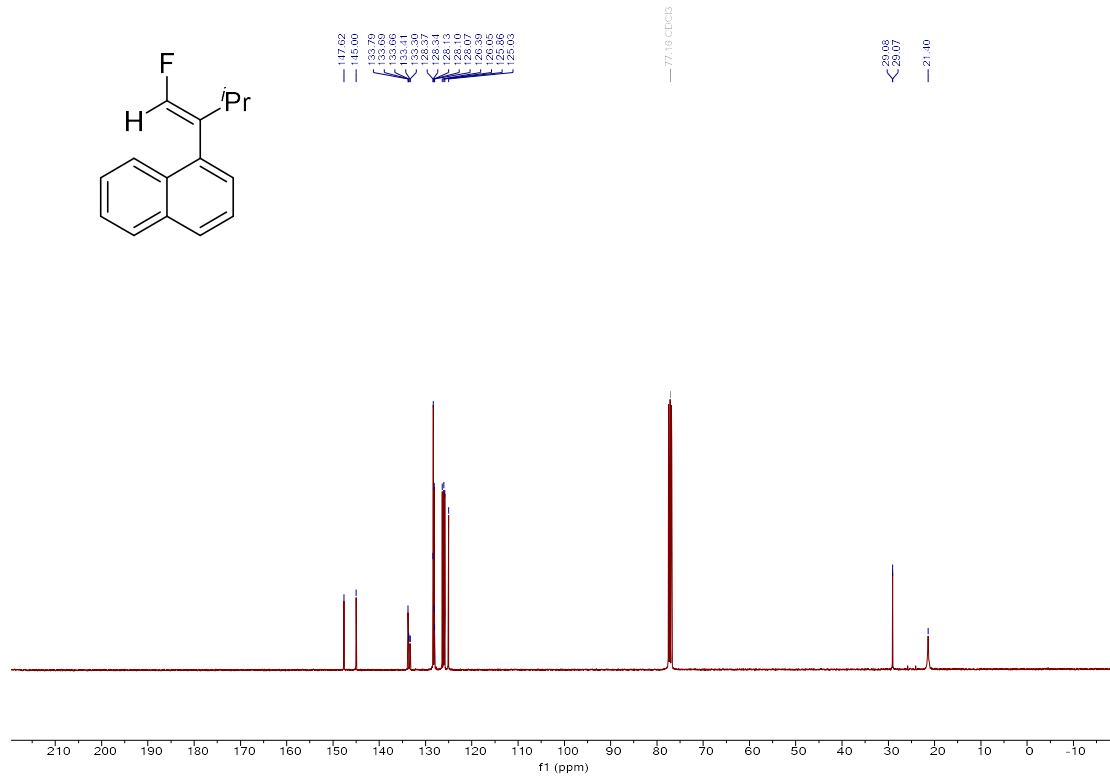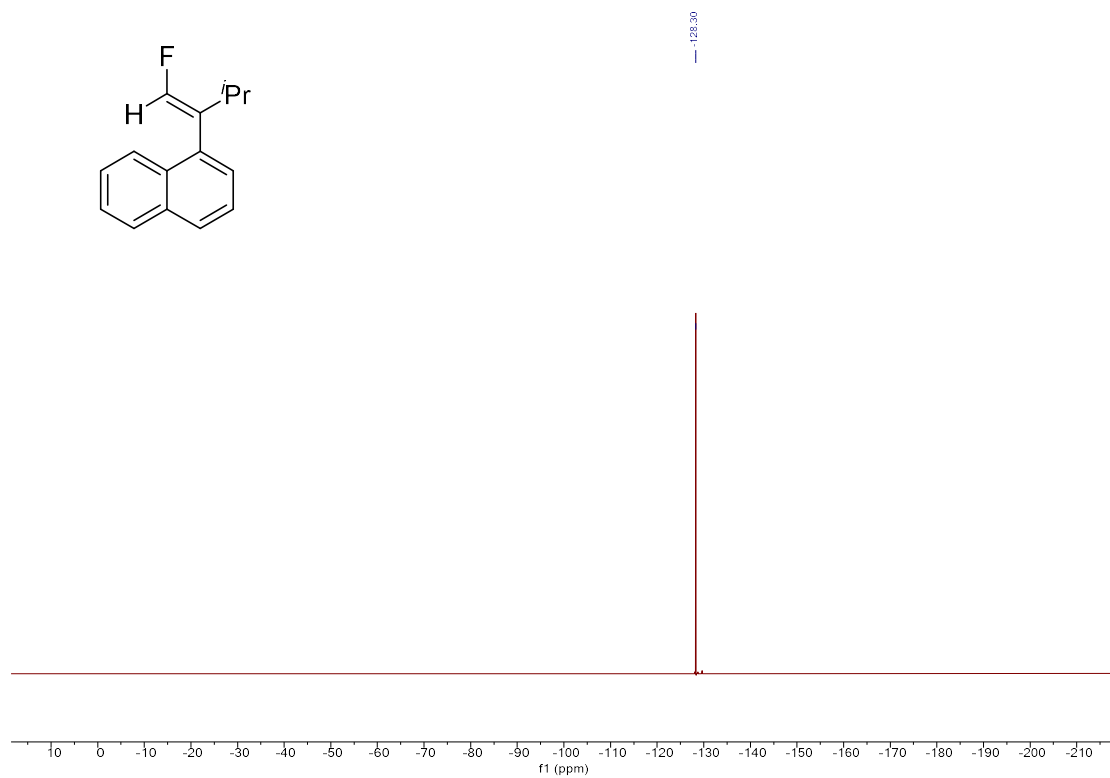

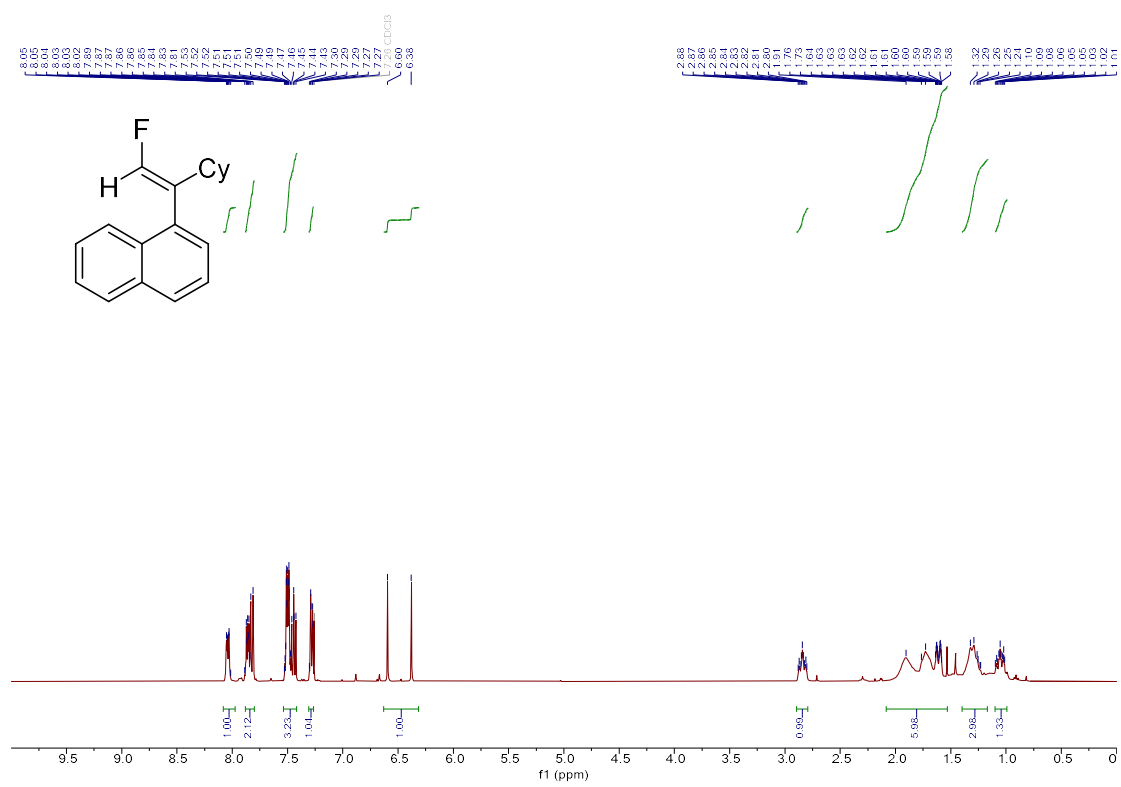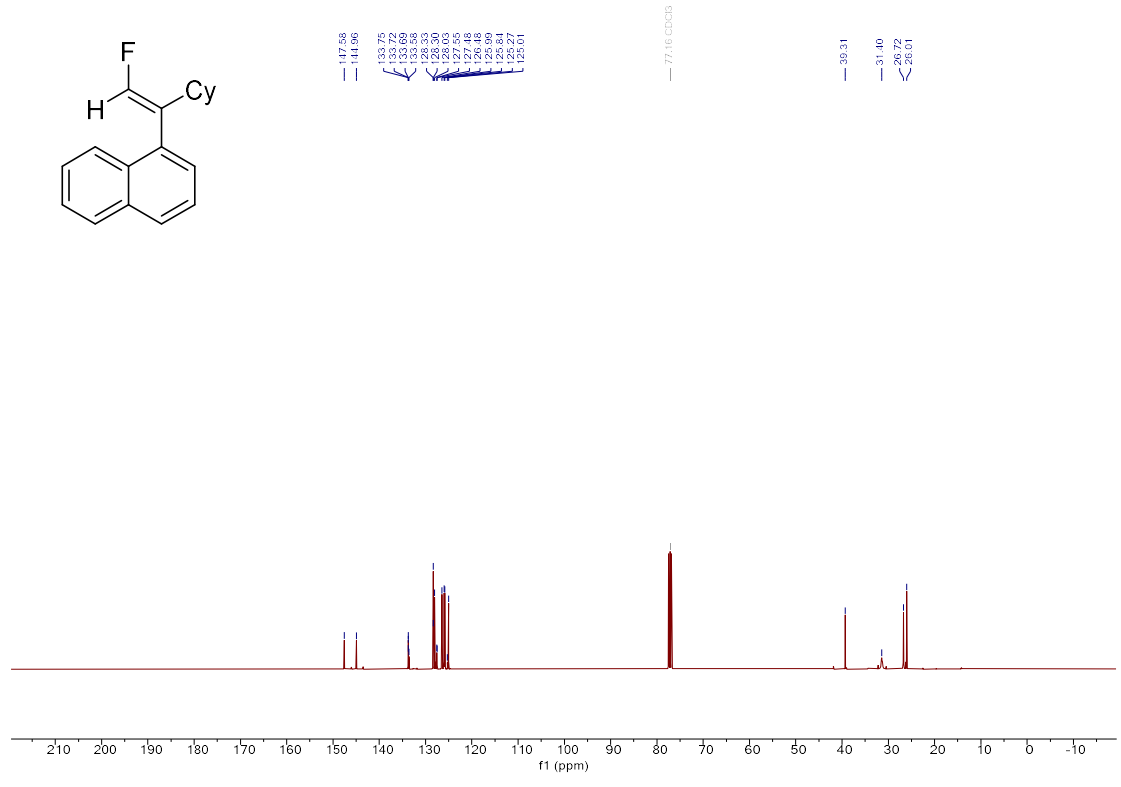

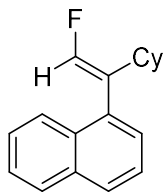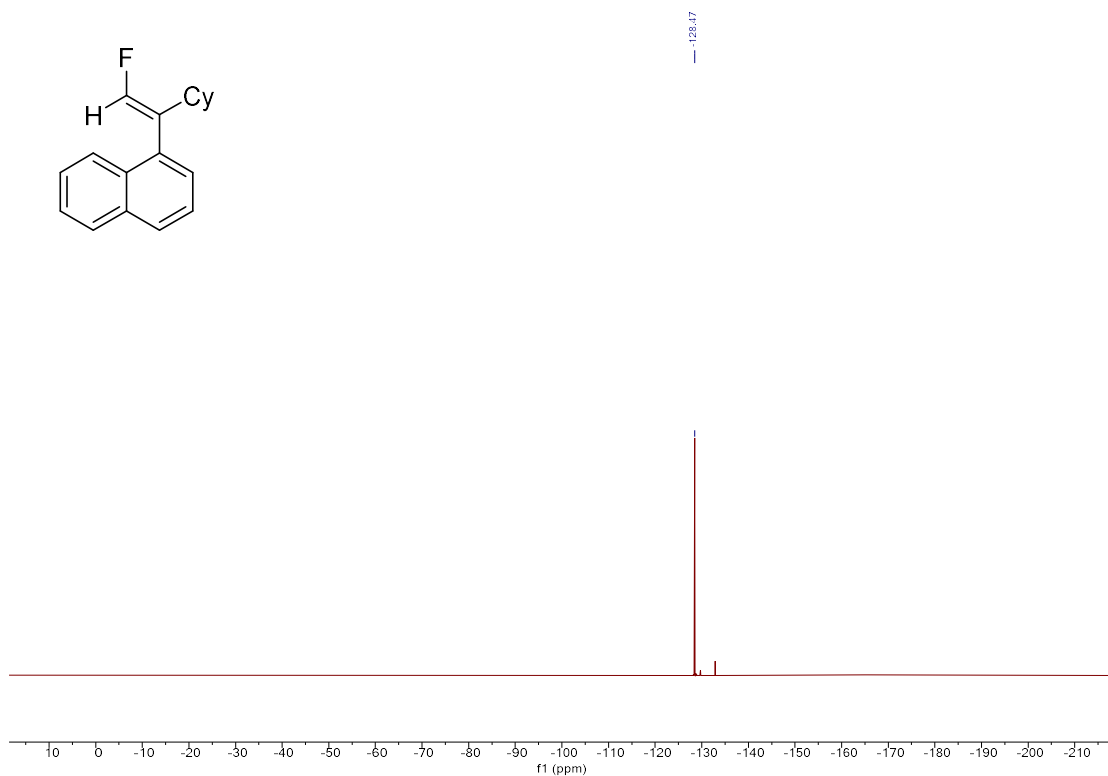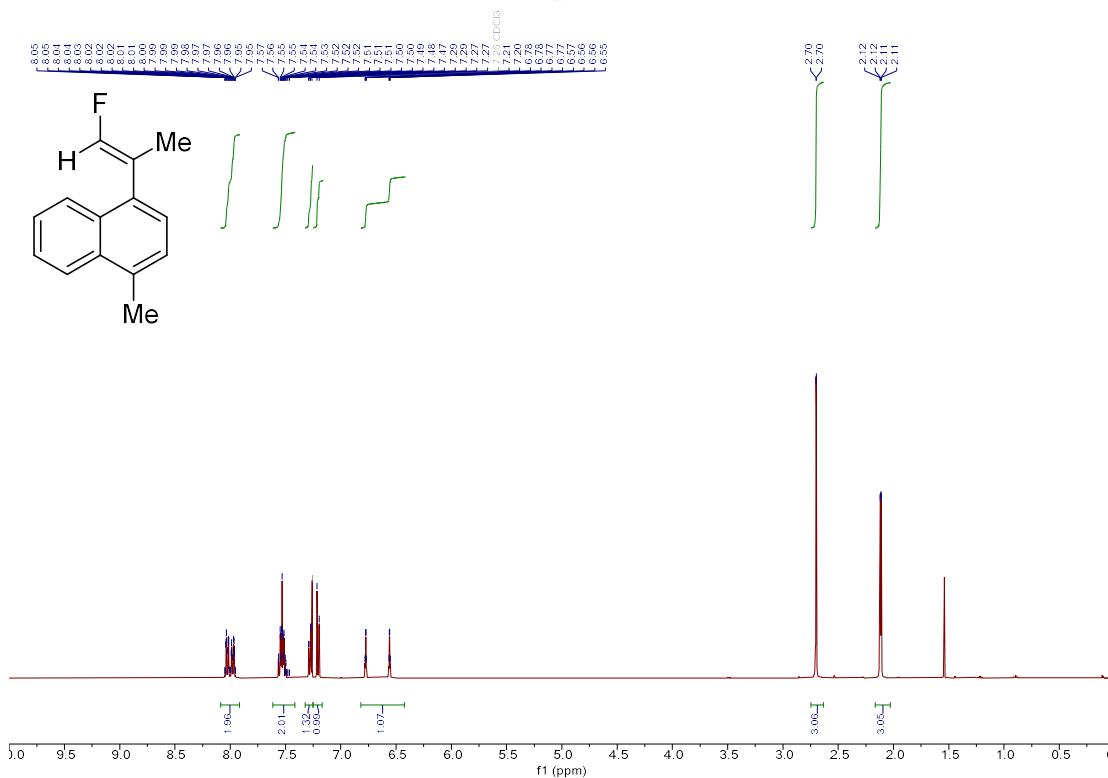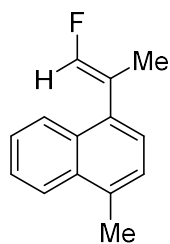

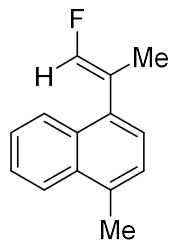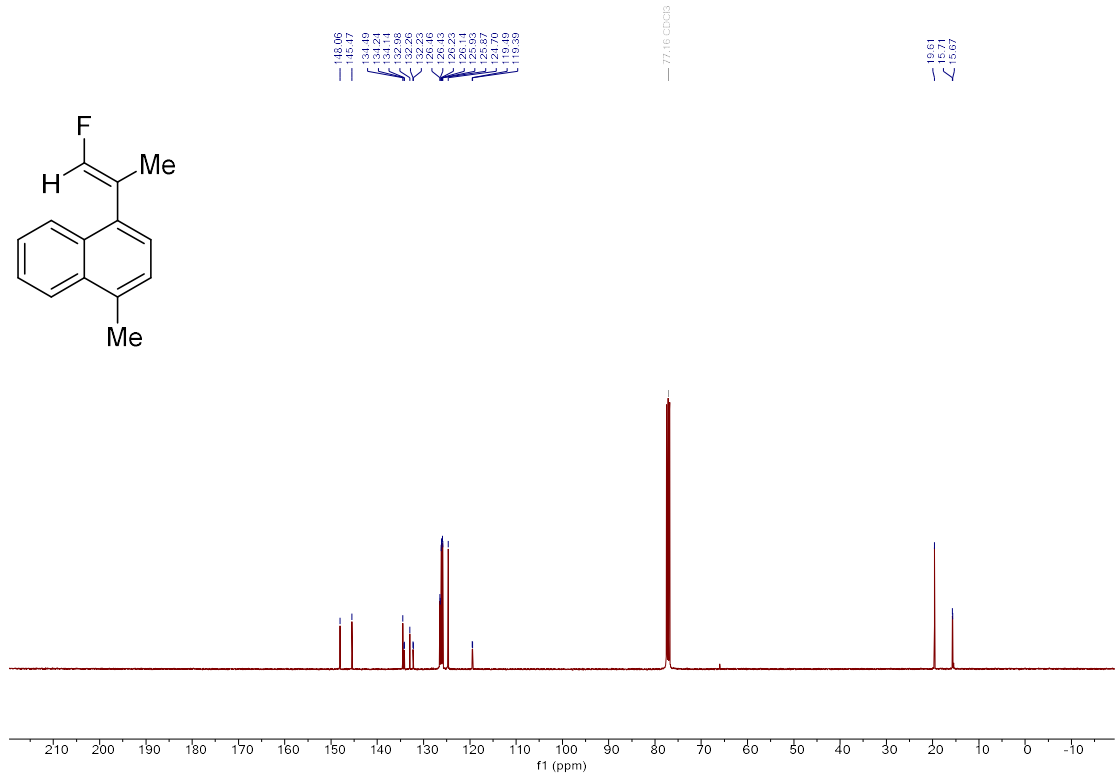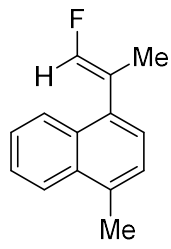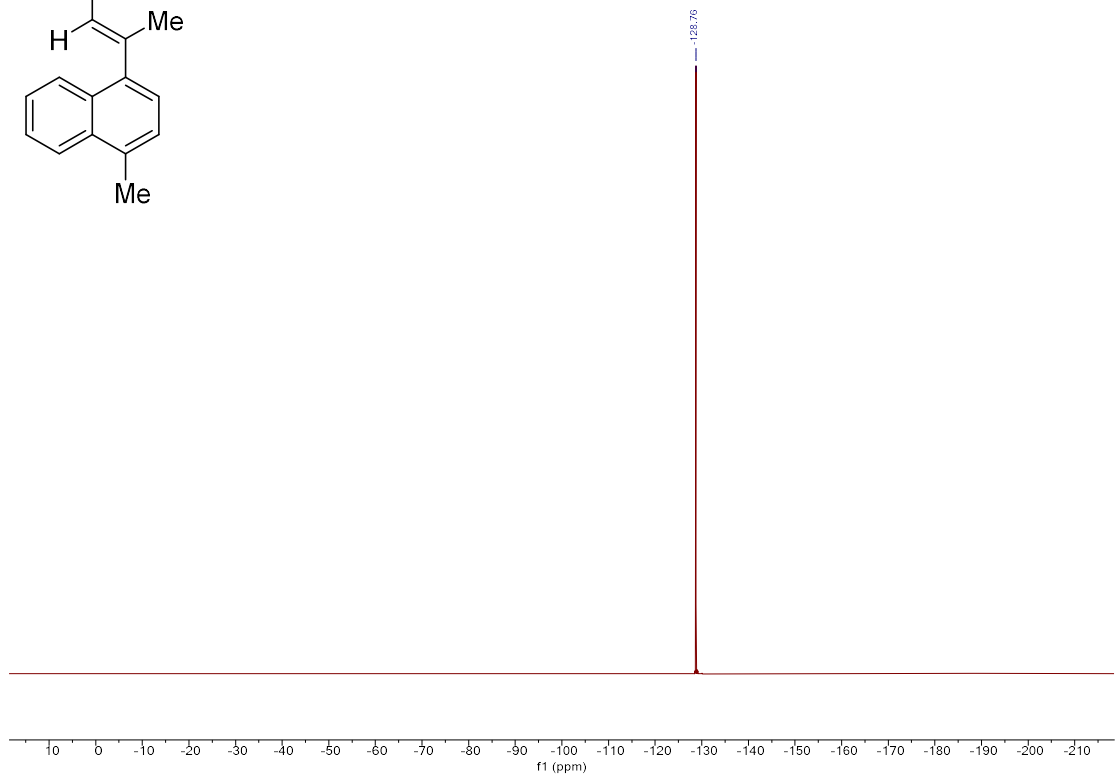



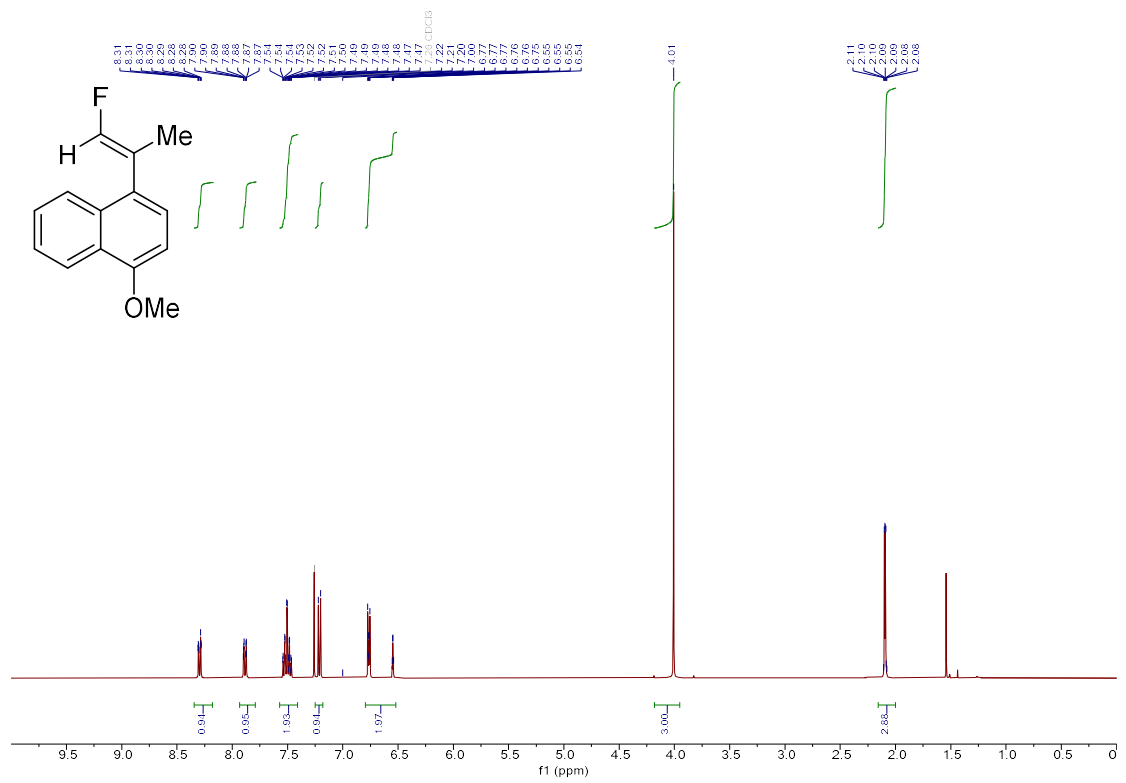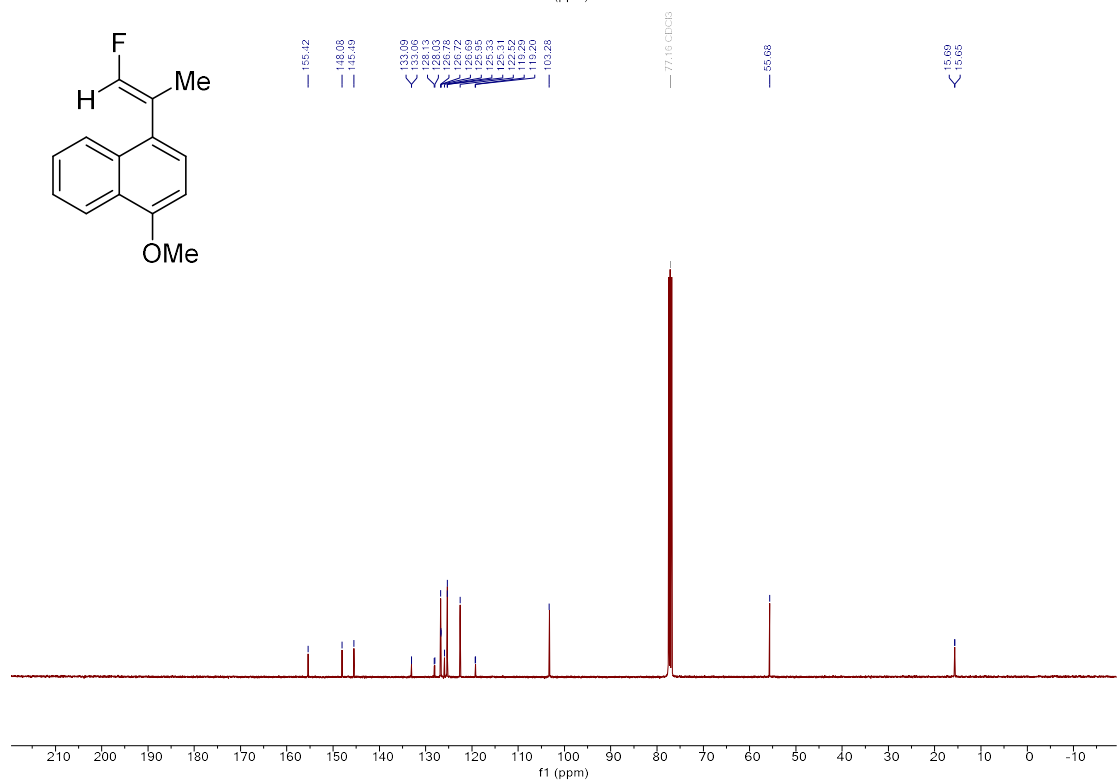

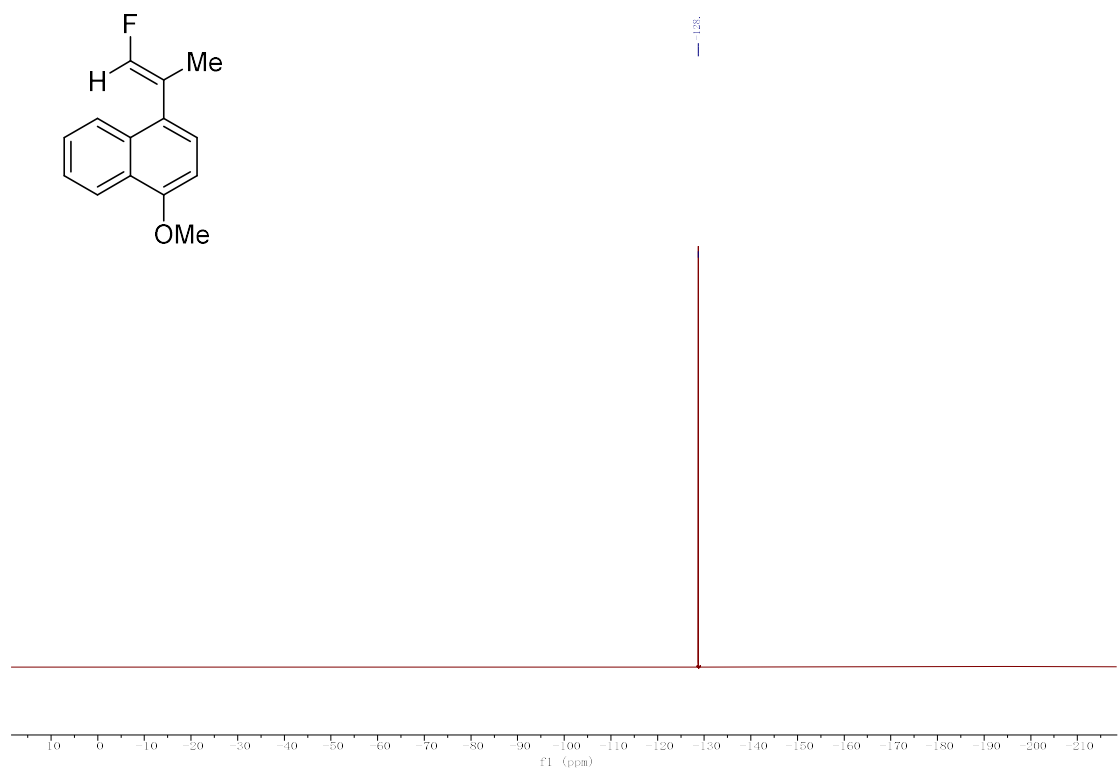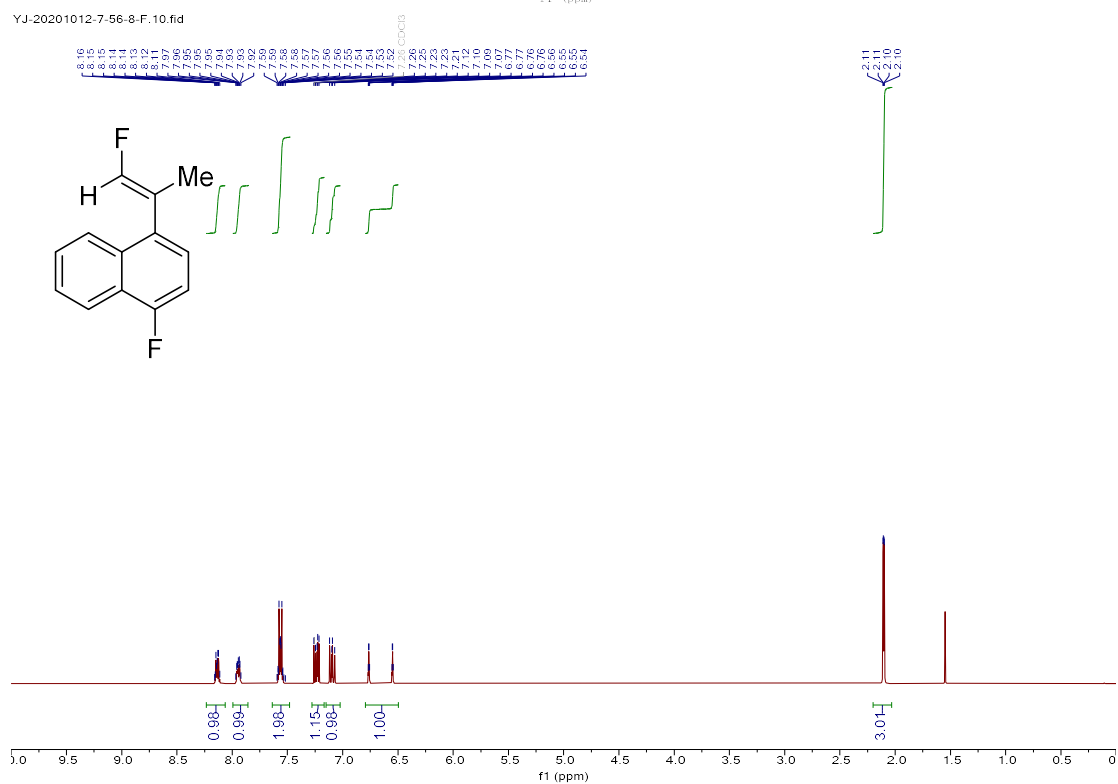

YJ-20201012-7-56-8-F.12.fid

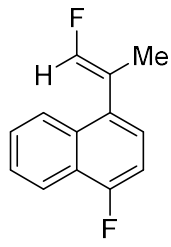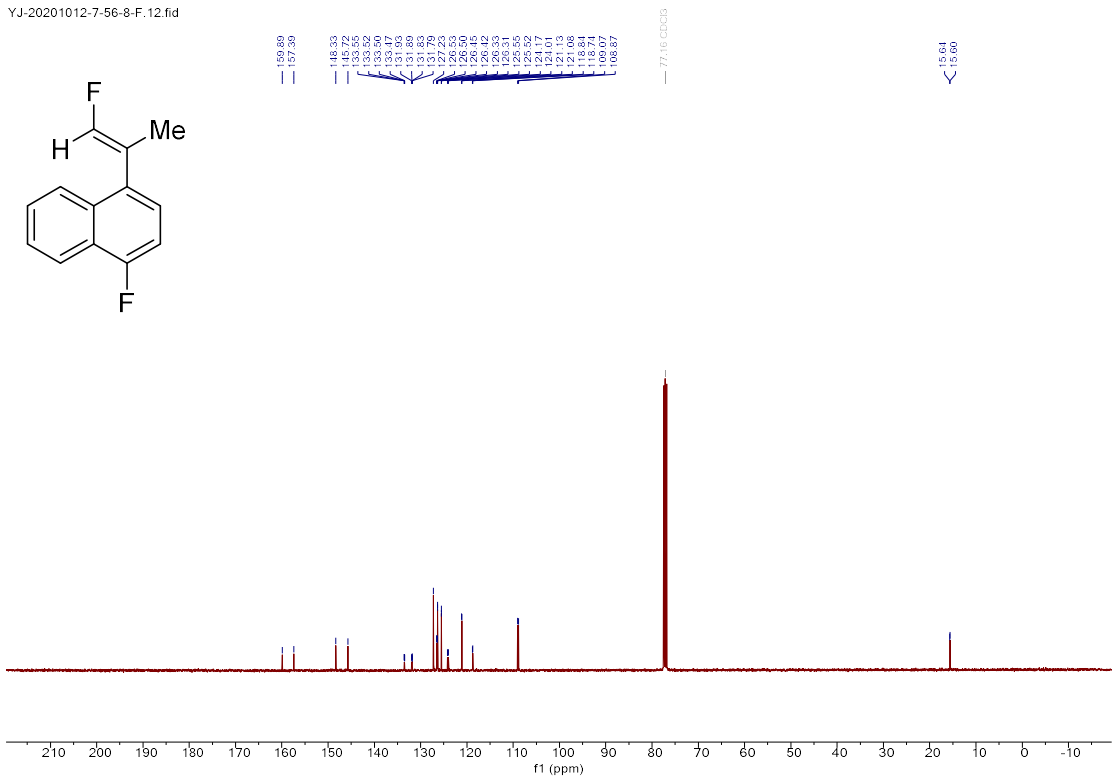

YJ-20201012-7-56-8-F.11.fid

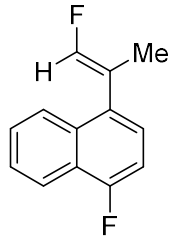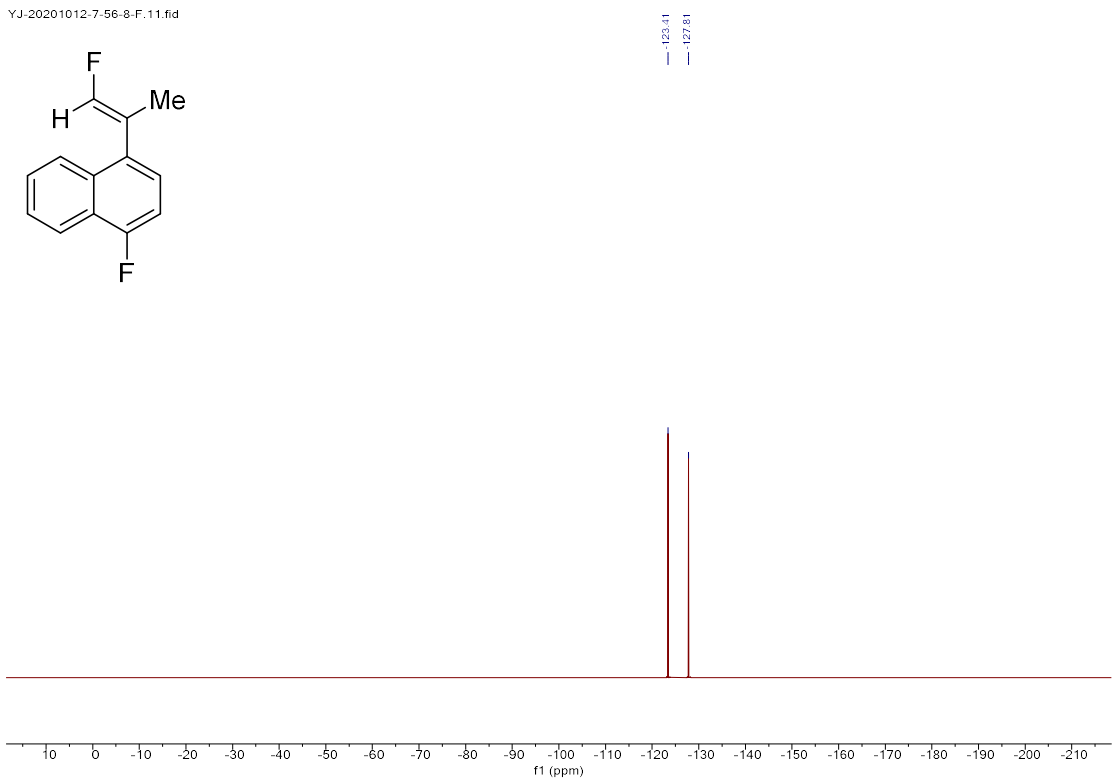

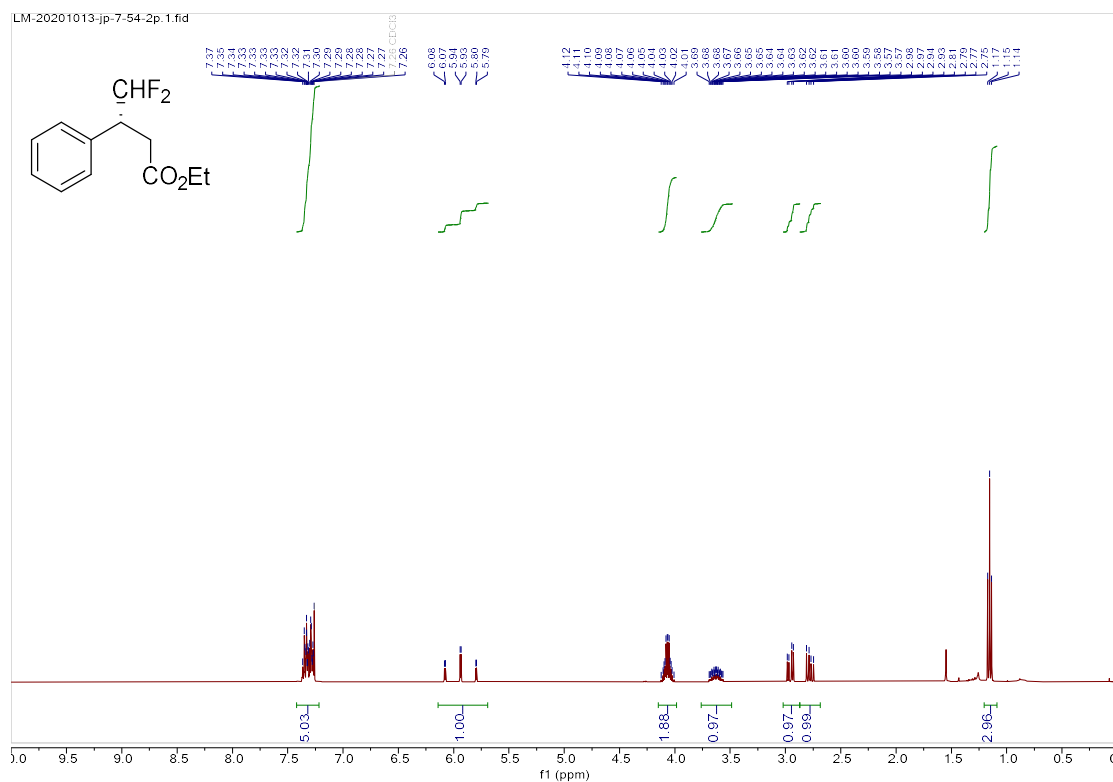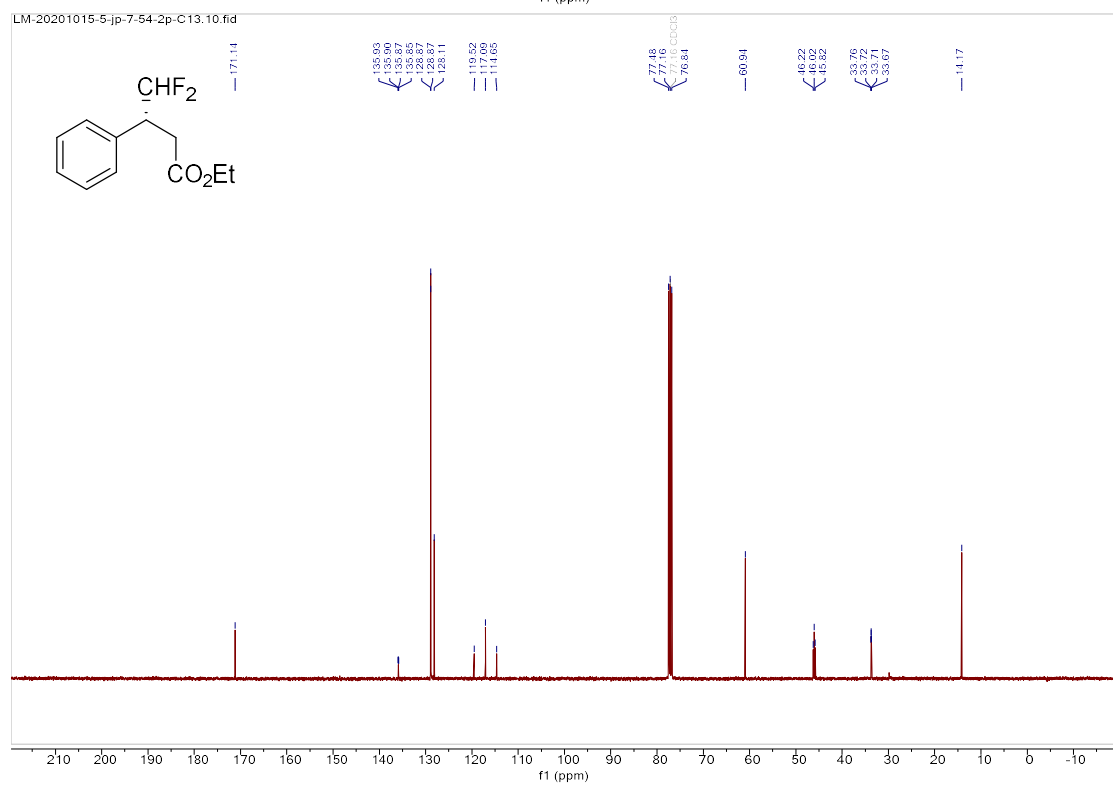

LM-20201013-jp-7-54-2p.2.fid

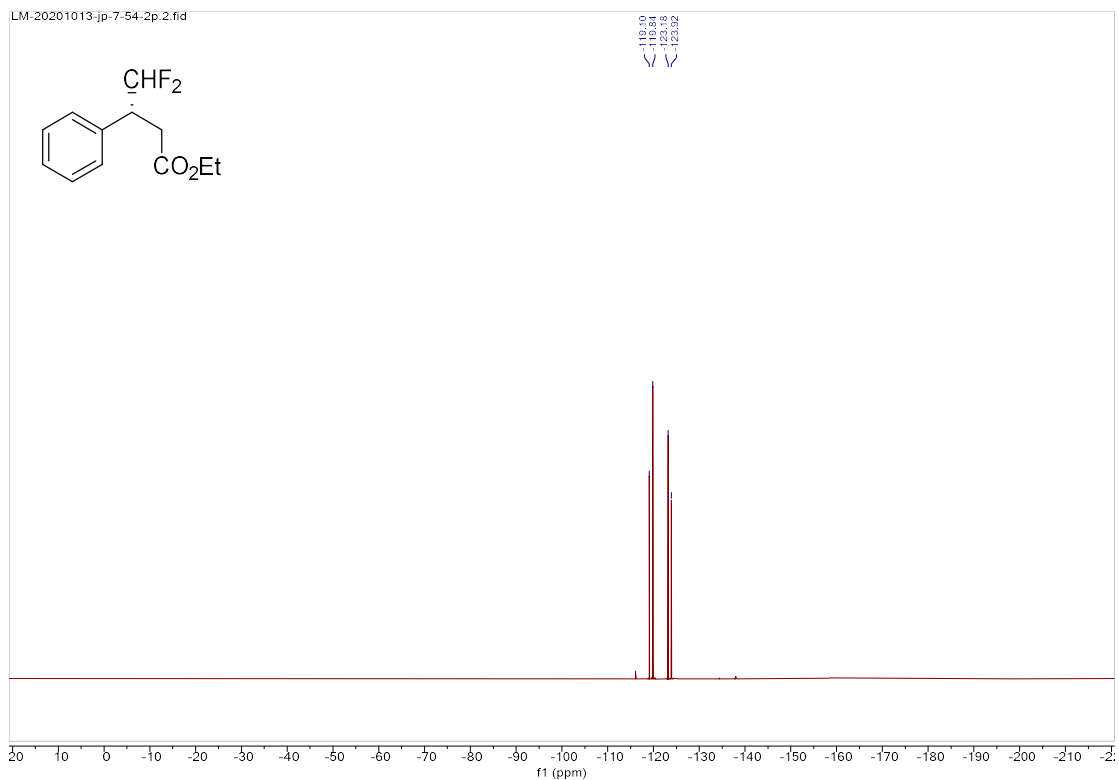

YJ-20201012-7-54-16-P.10.fid

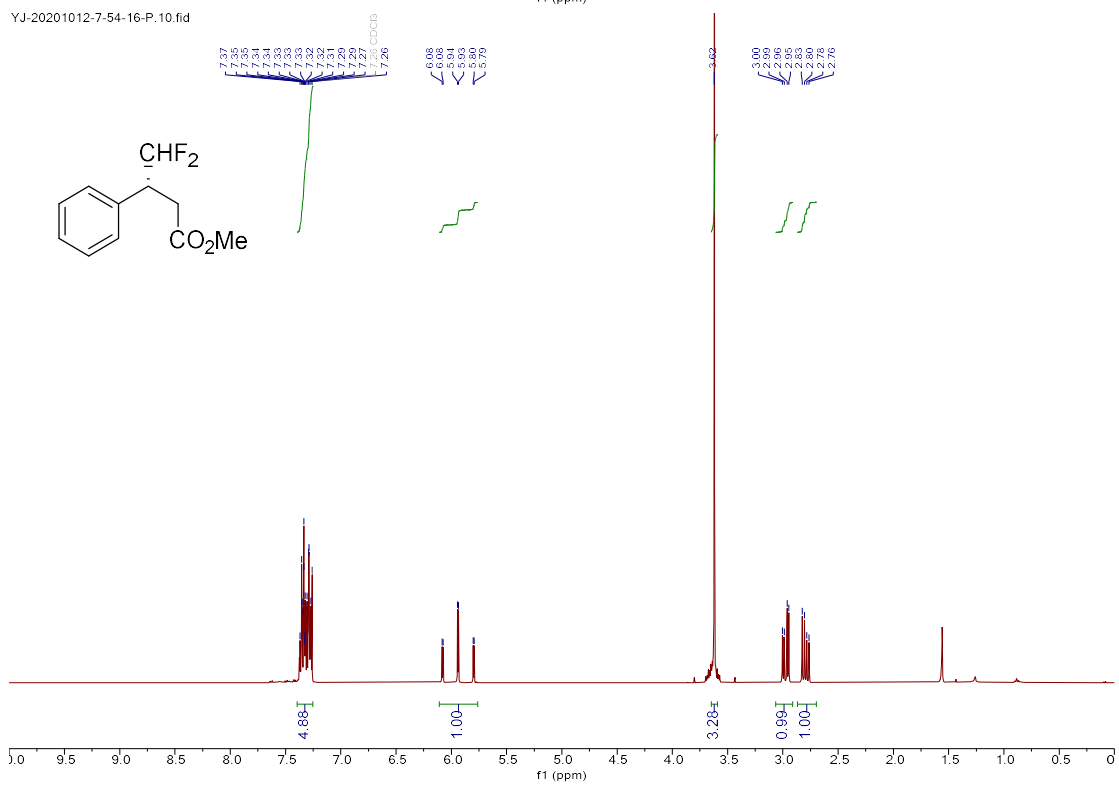

YJ-20201012-7-54-16-P,11.fid

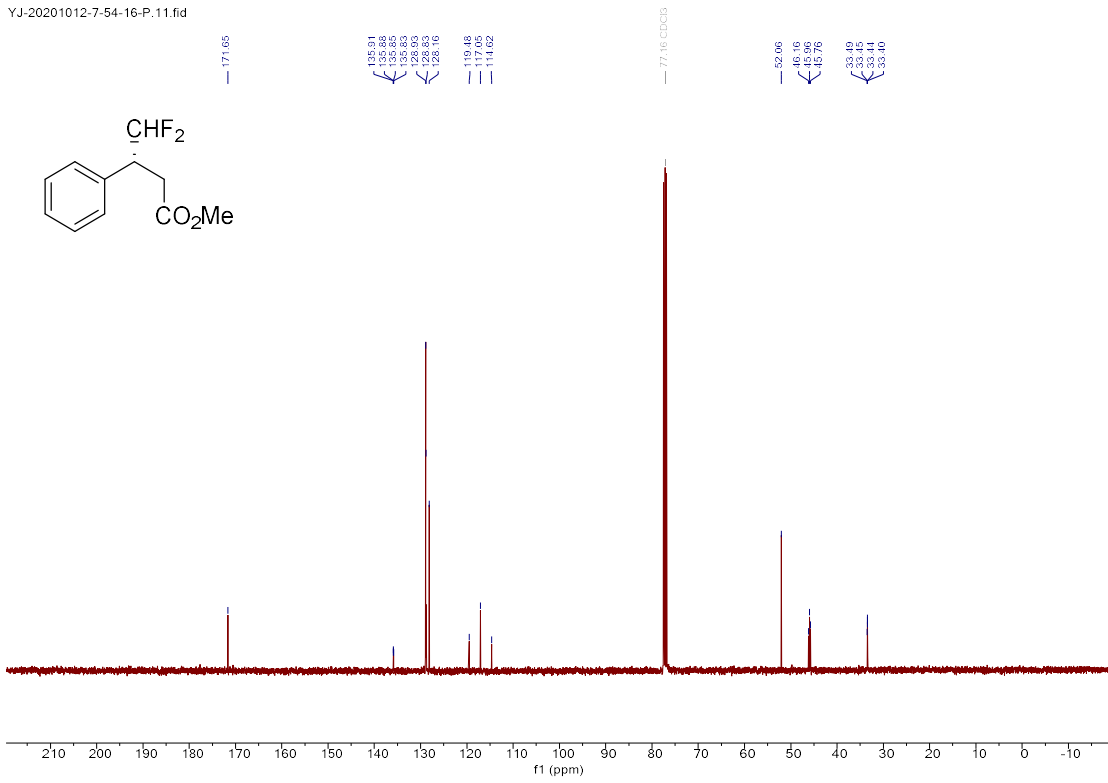

YJ-20201012-7-54-16-P,12.fid

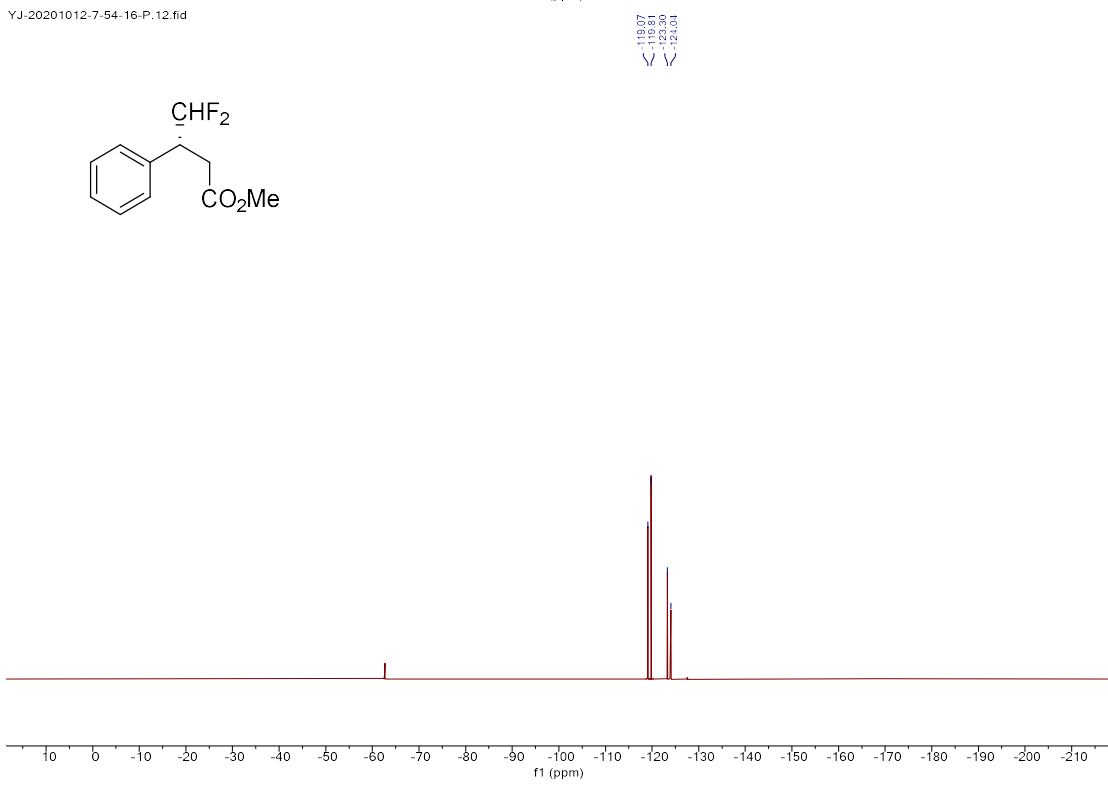

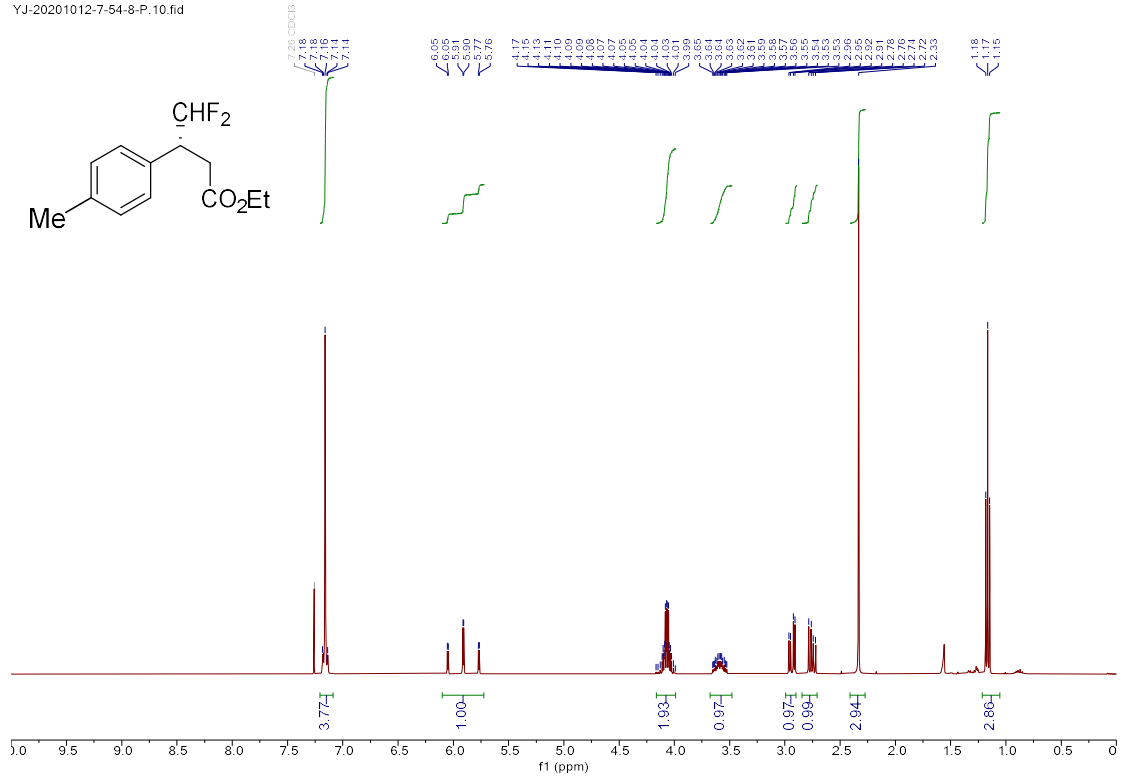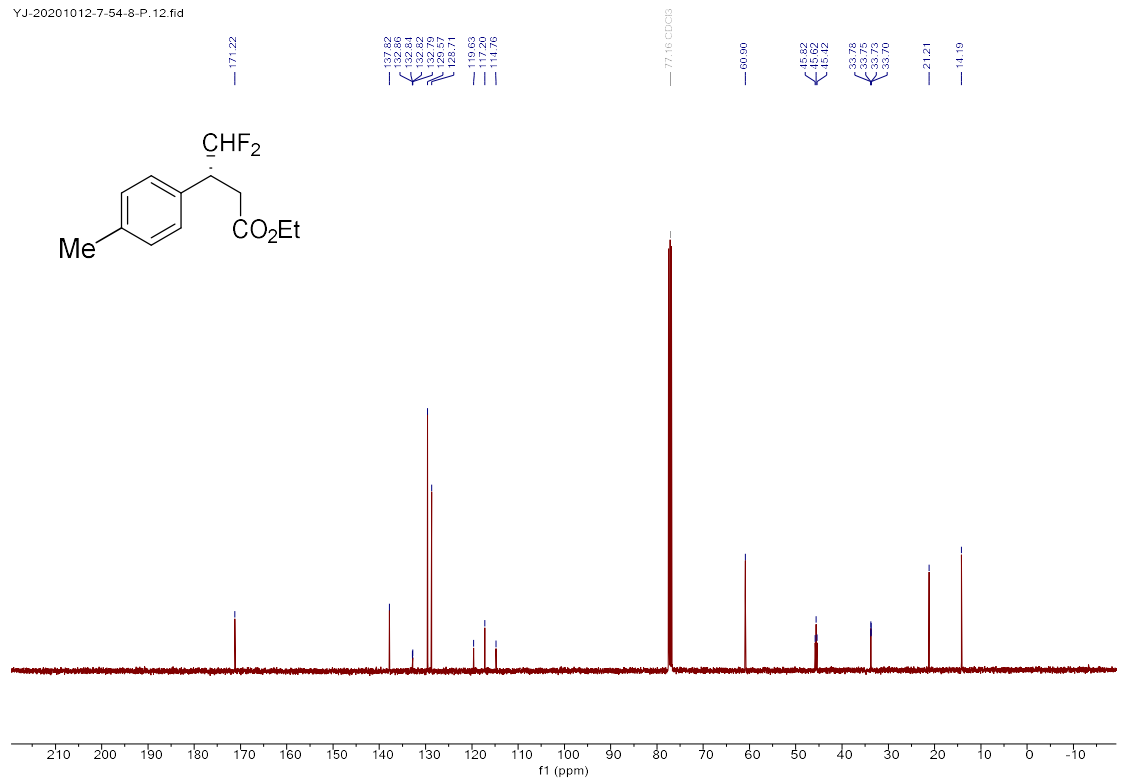

119.95  
119.90  
123.22  
123.96

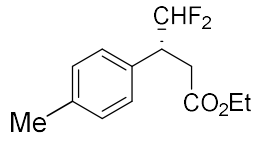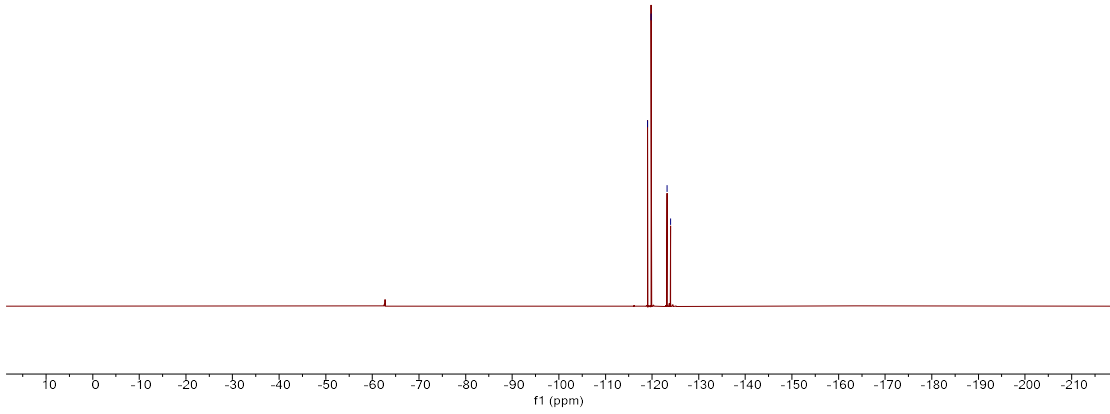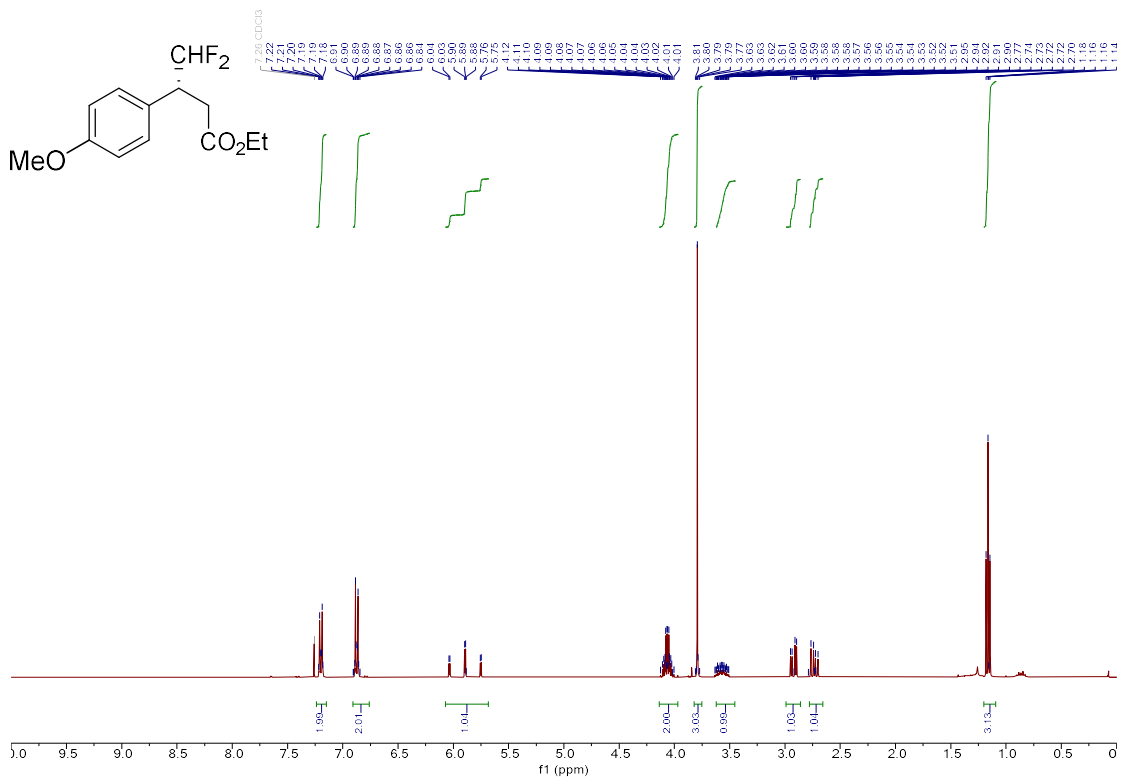



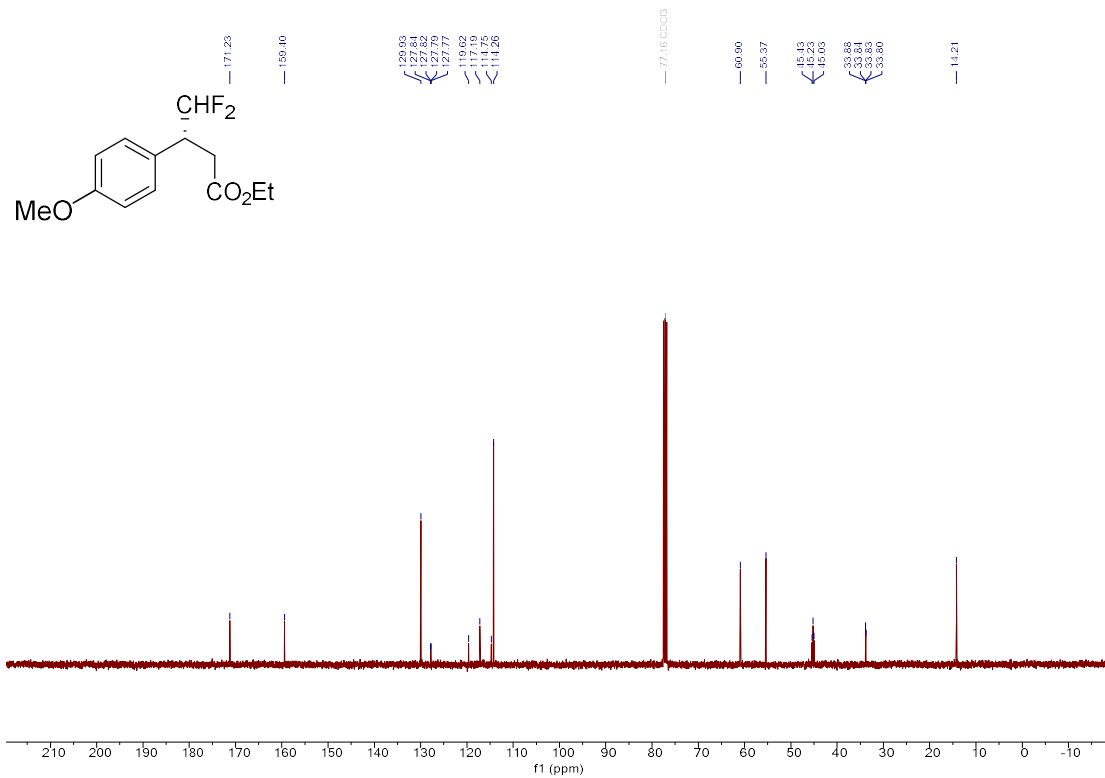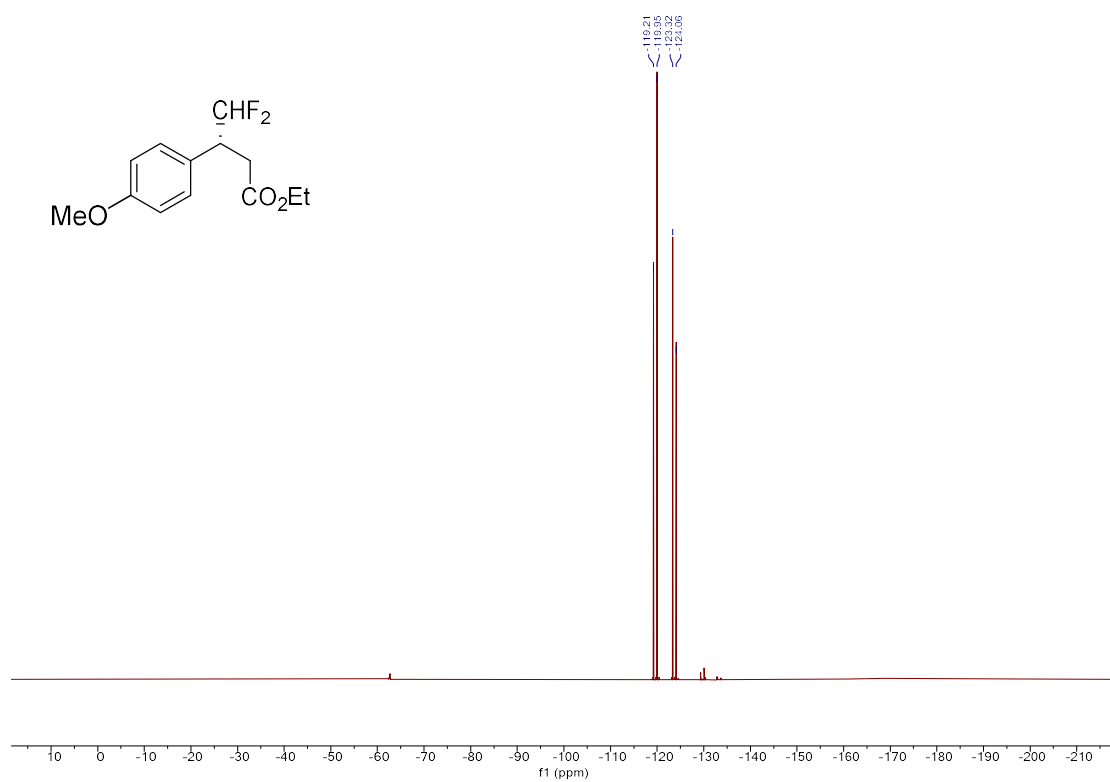



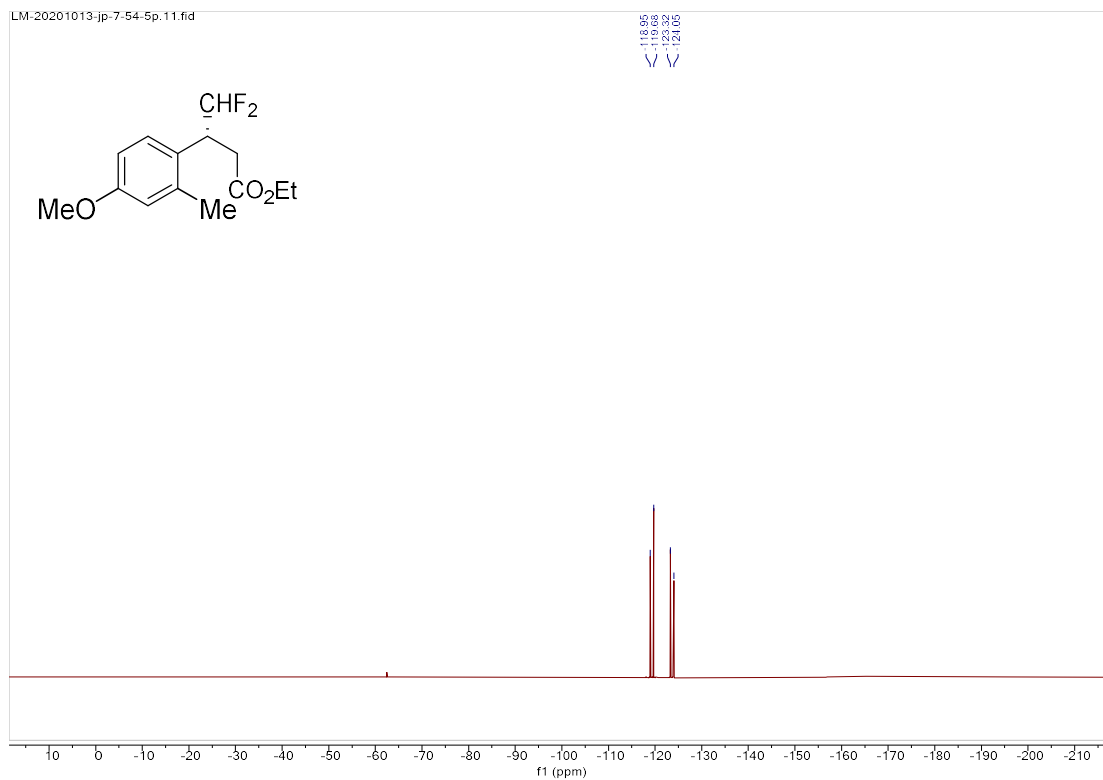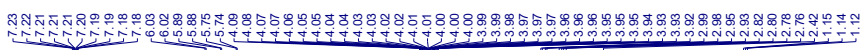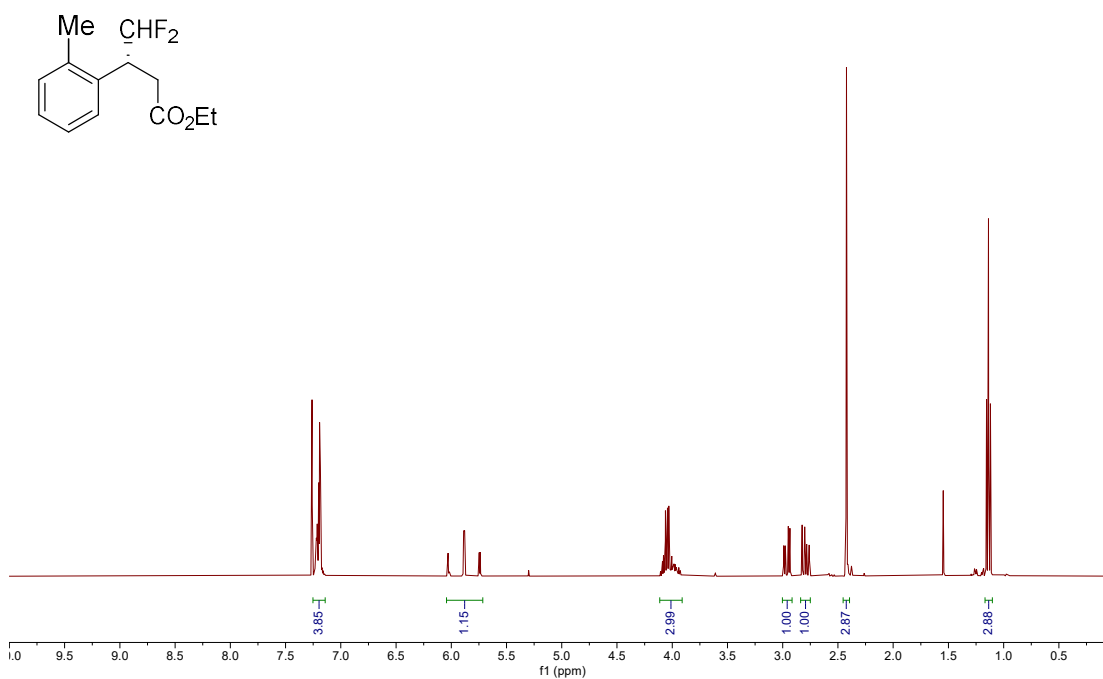

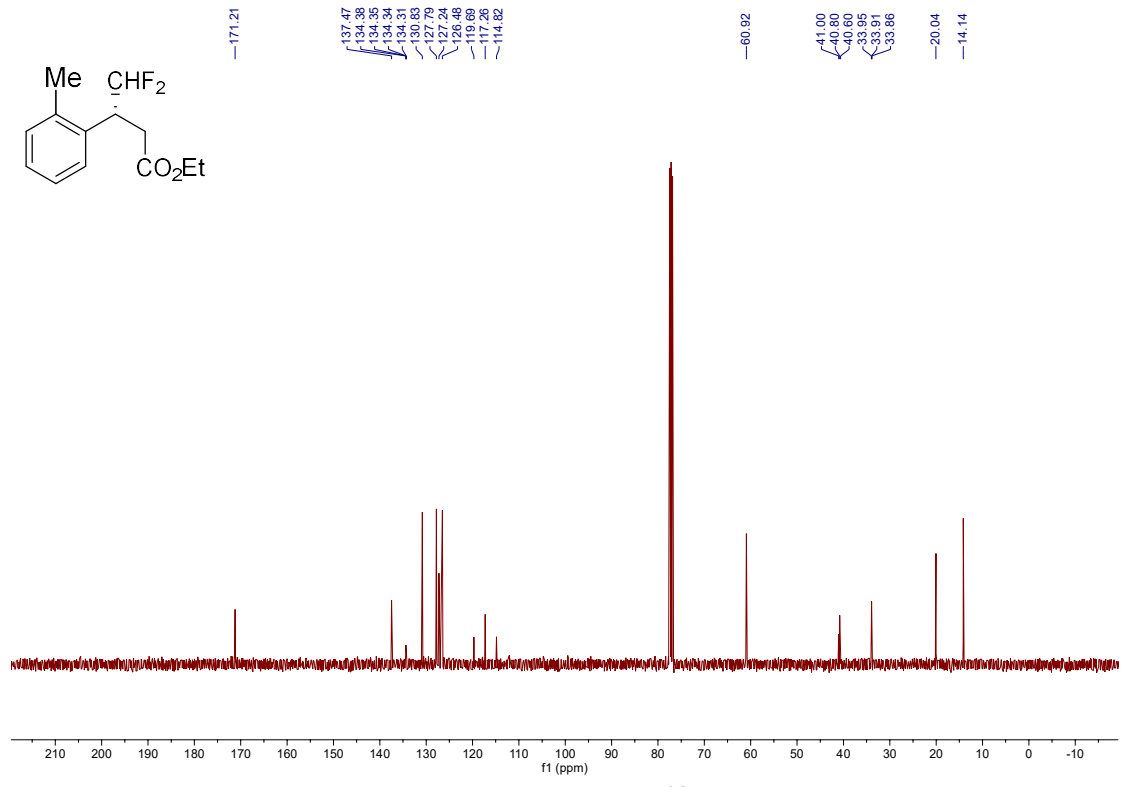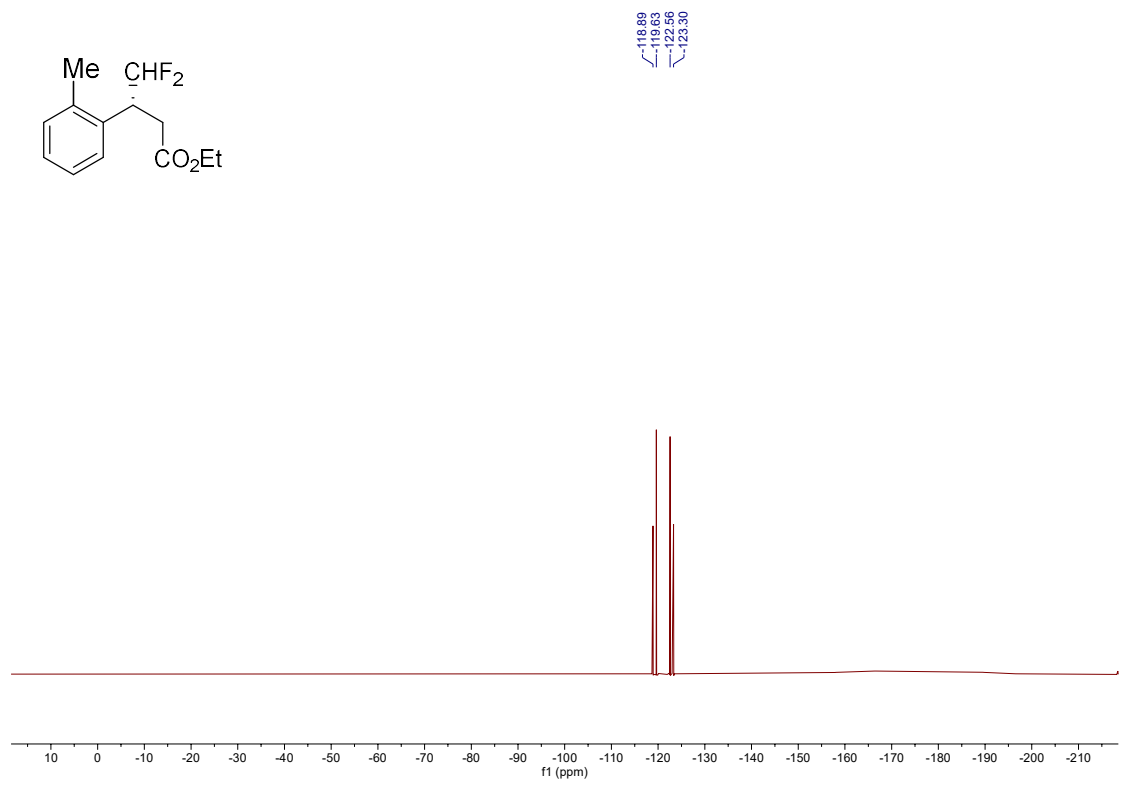

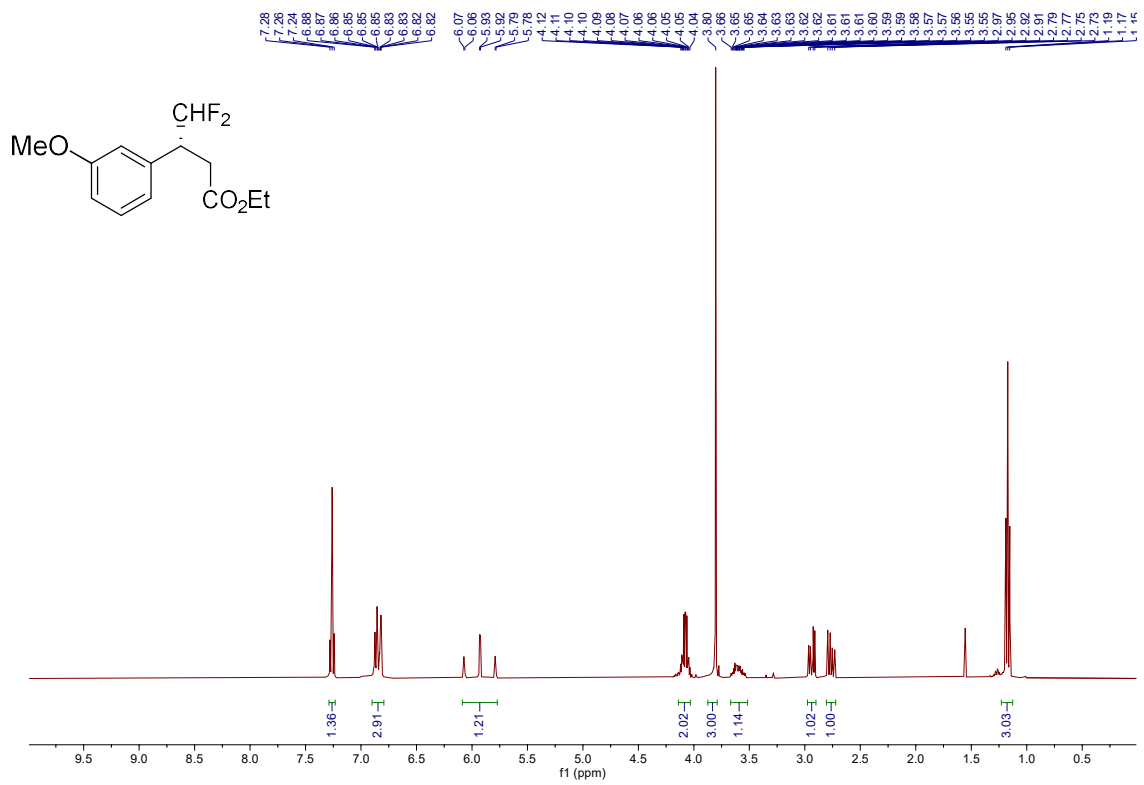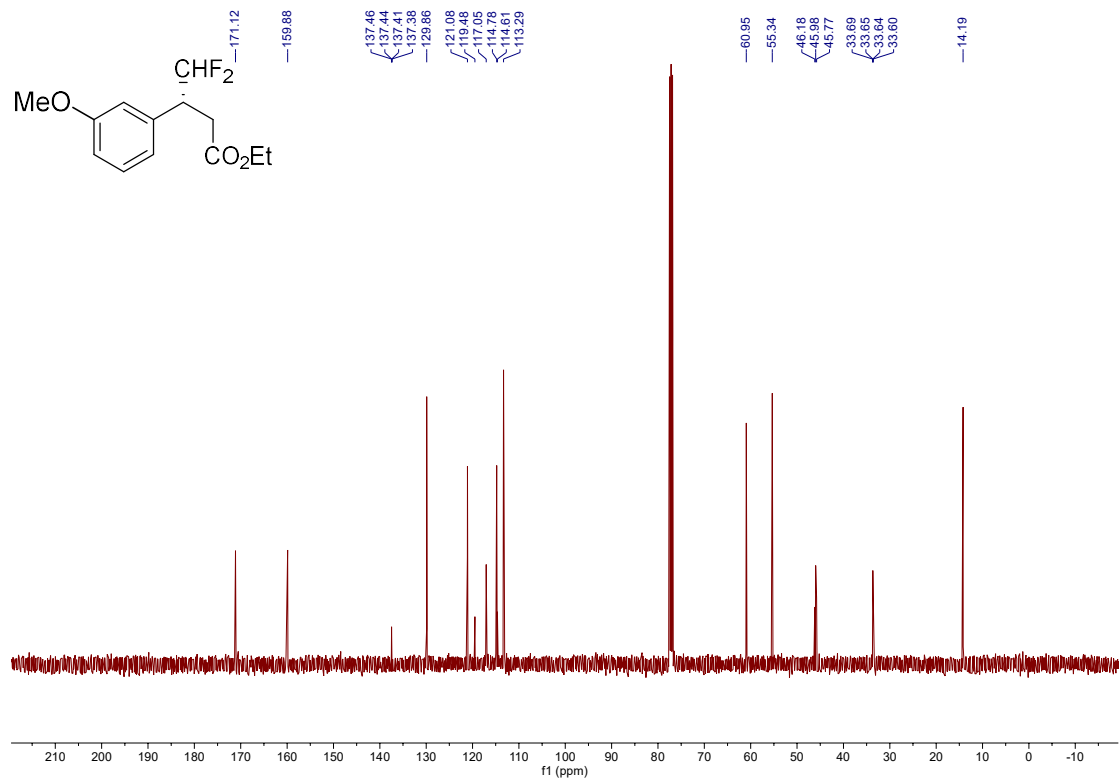

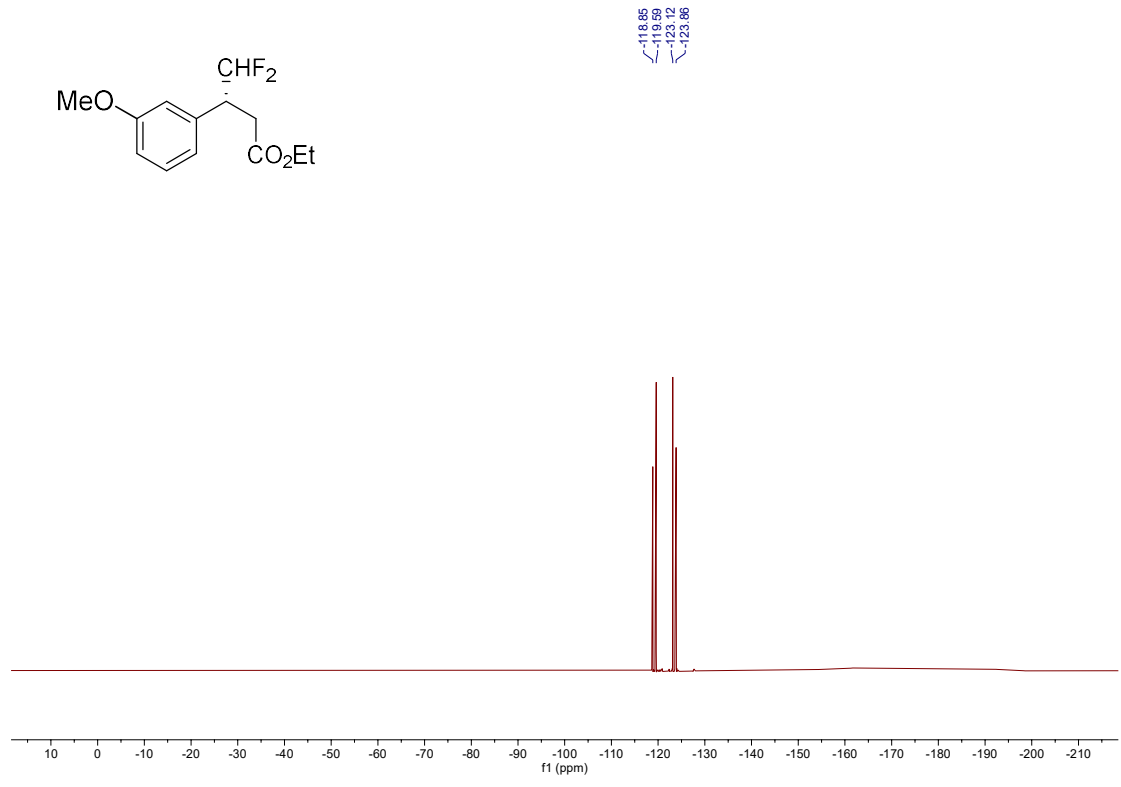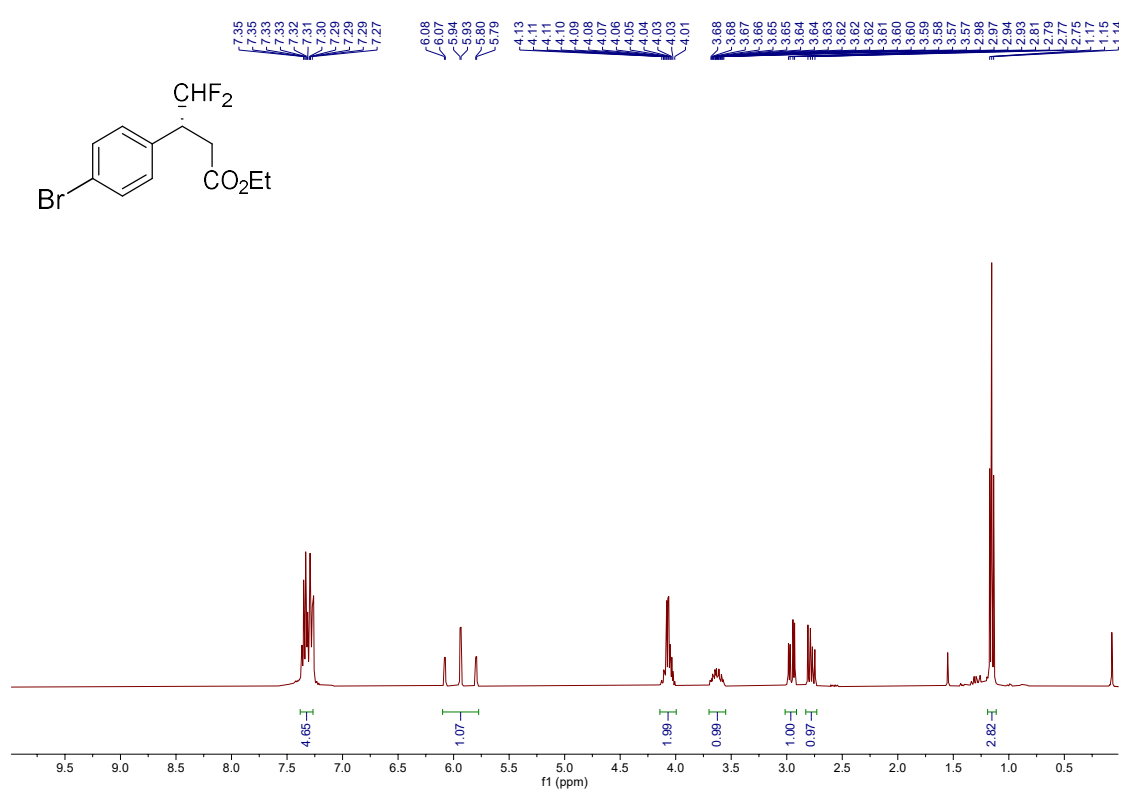

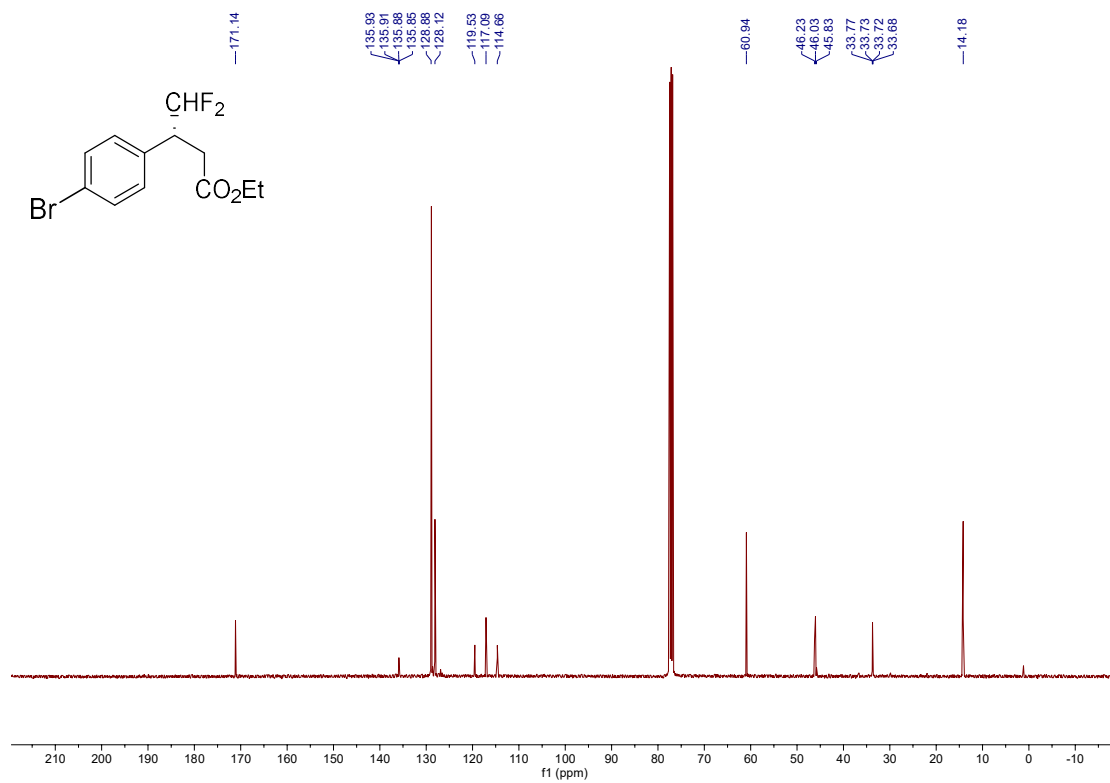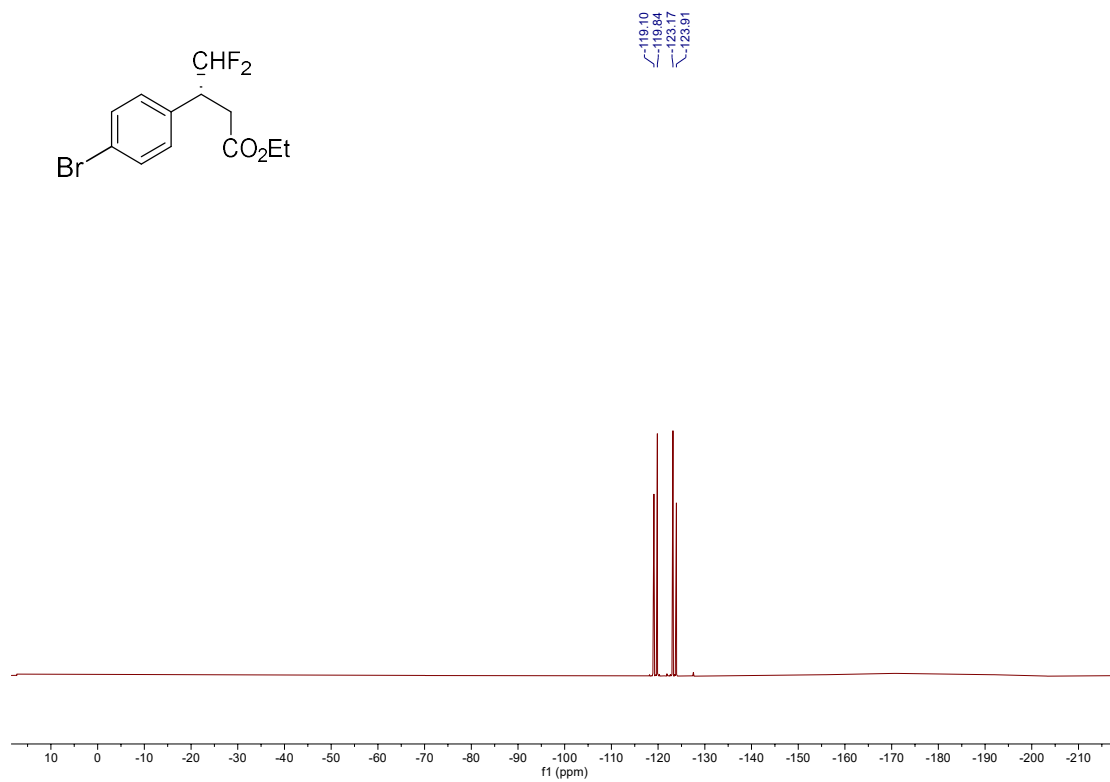

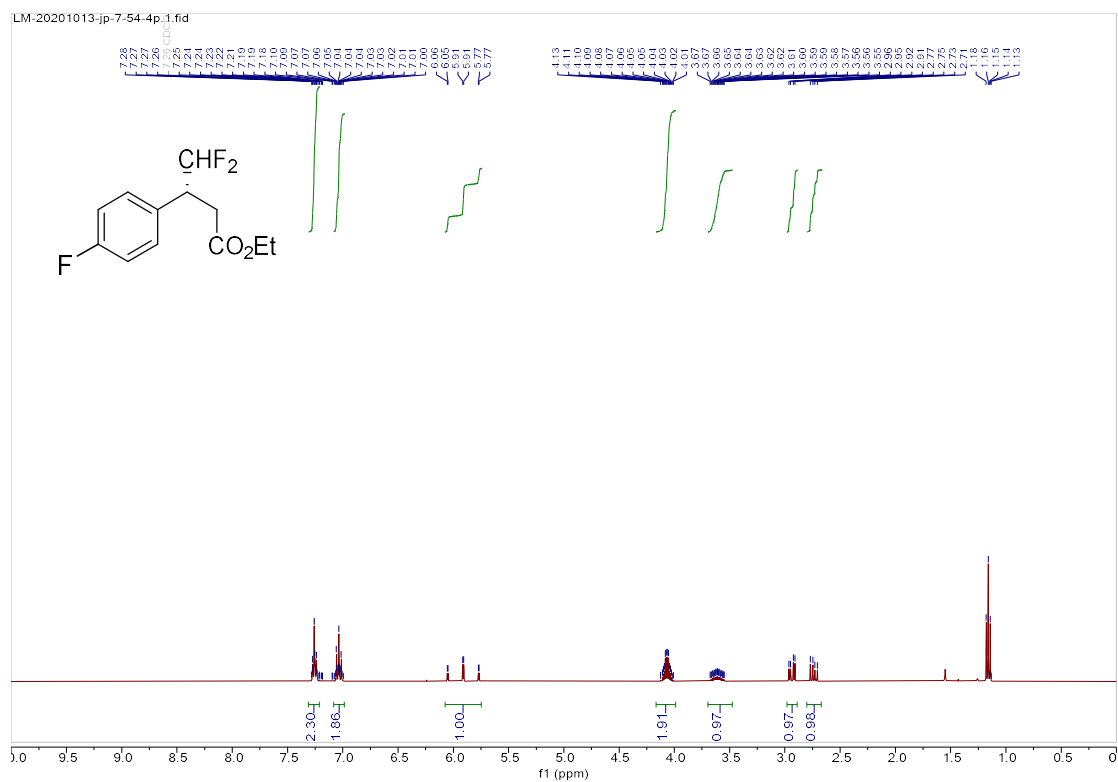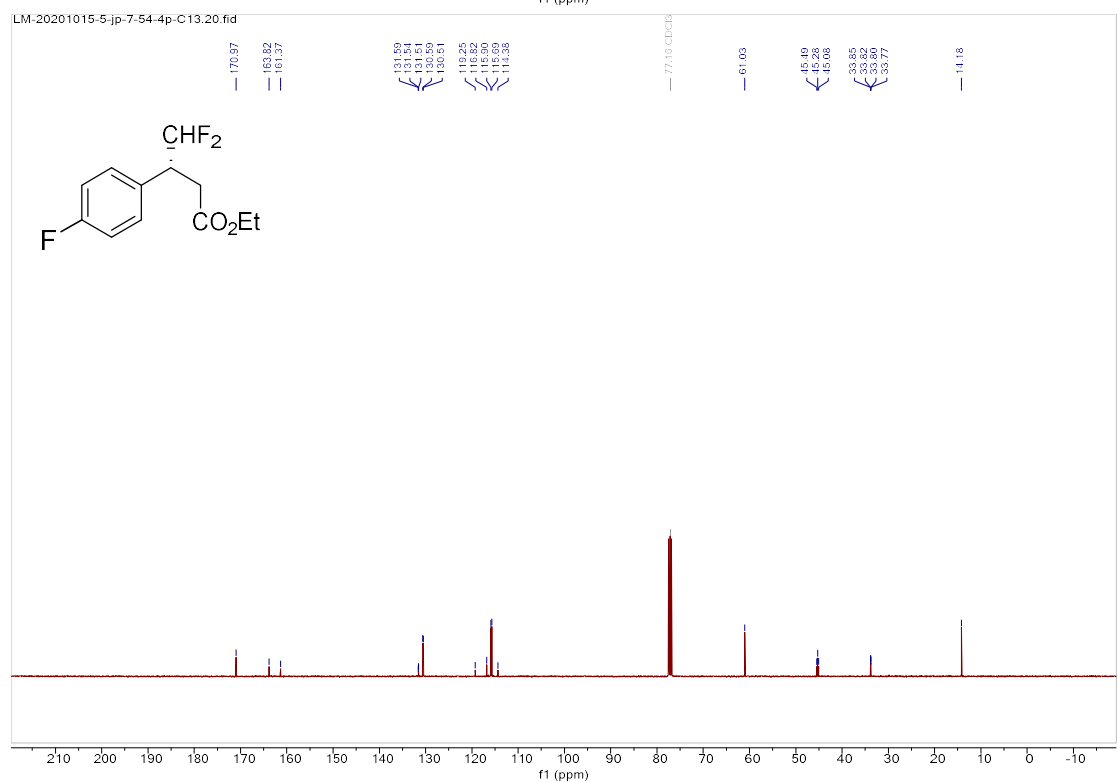



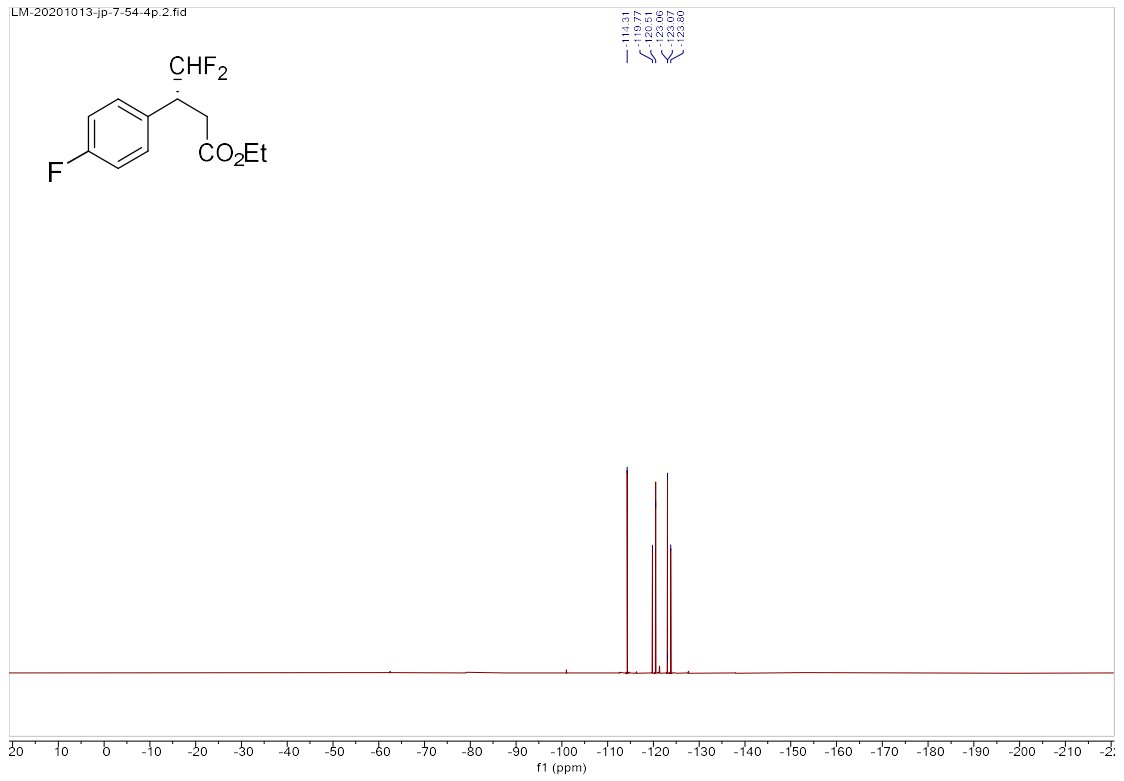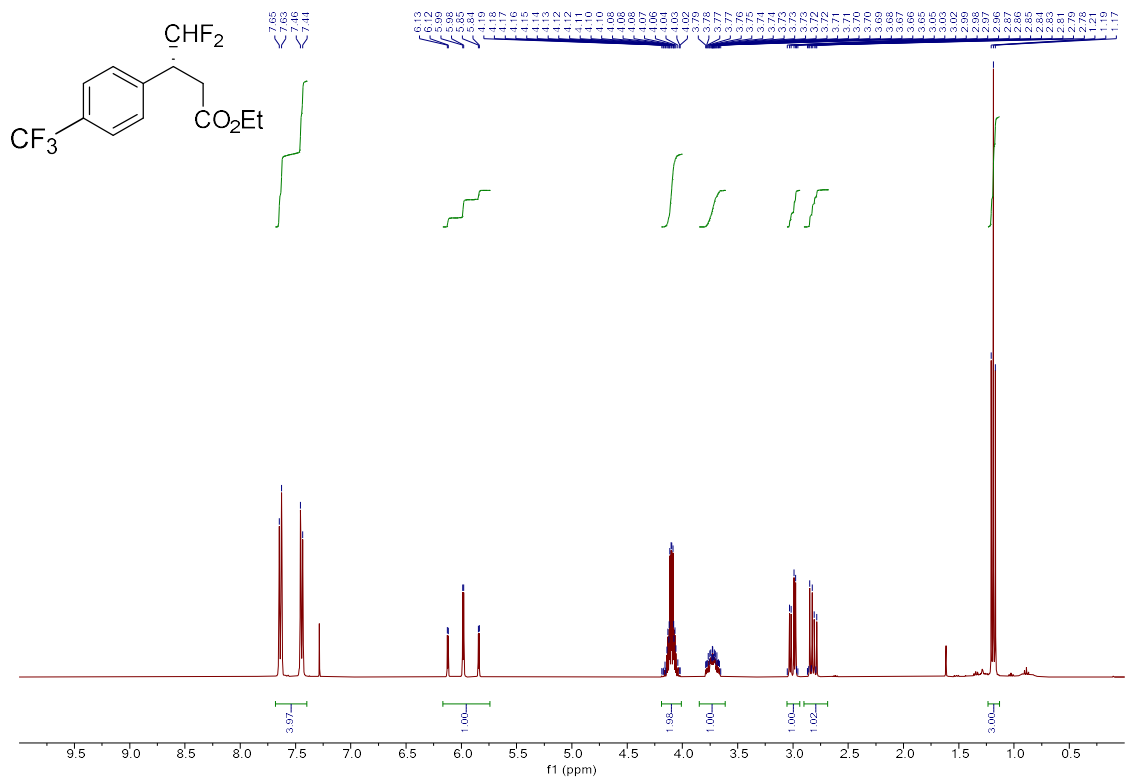

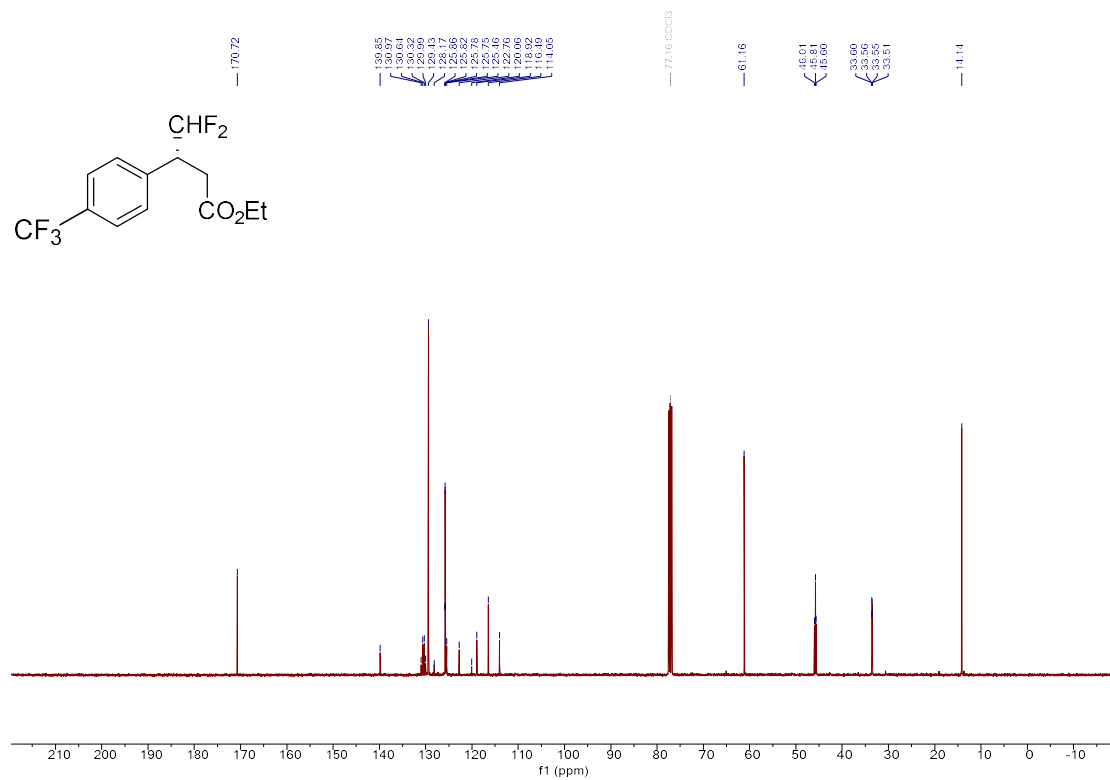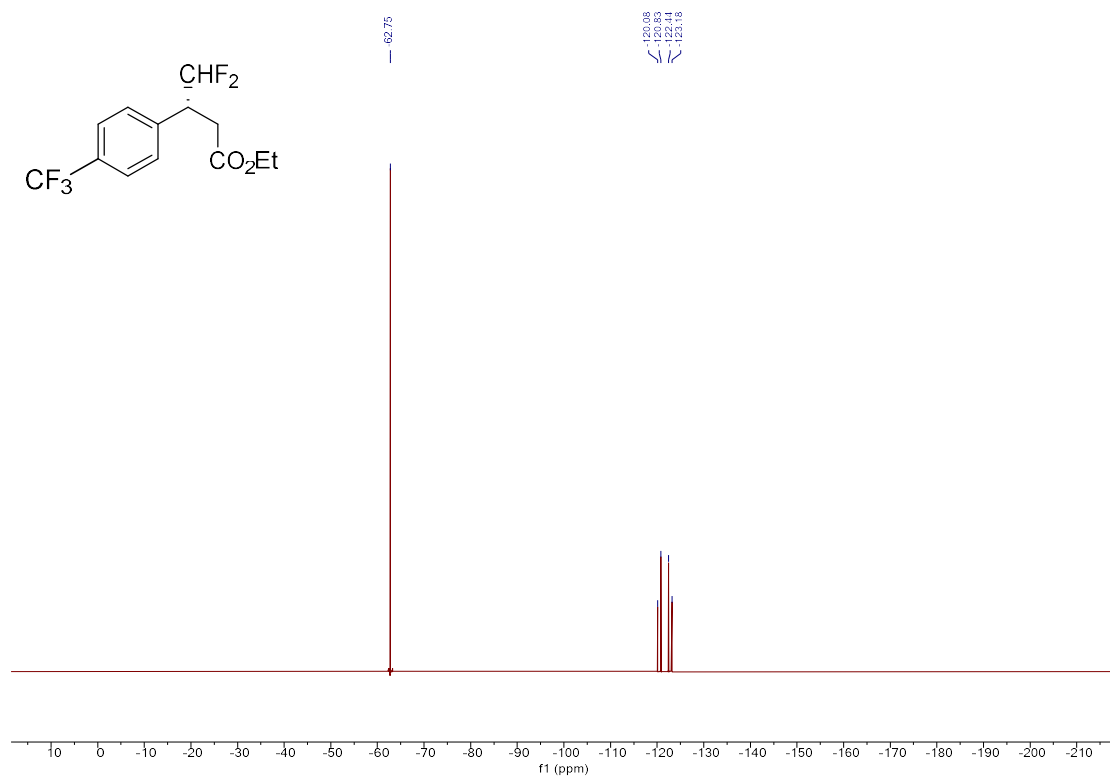

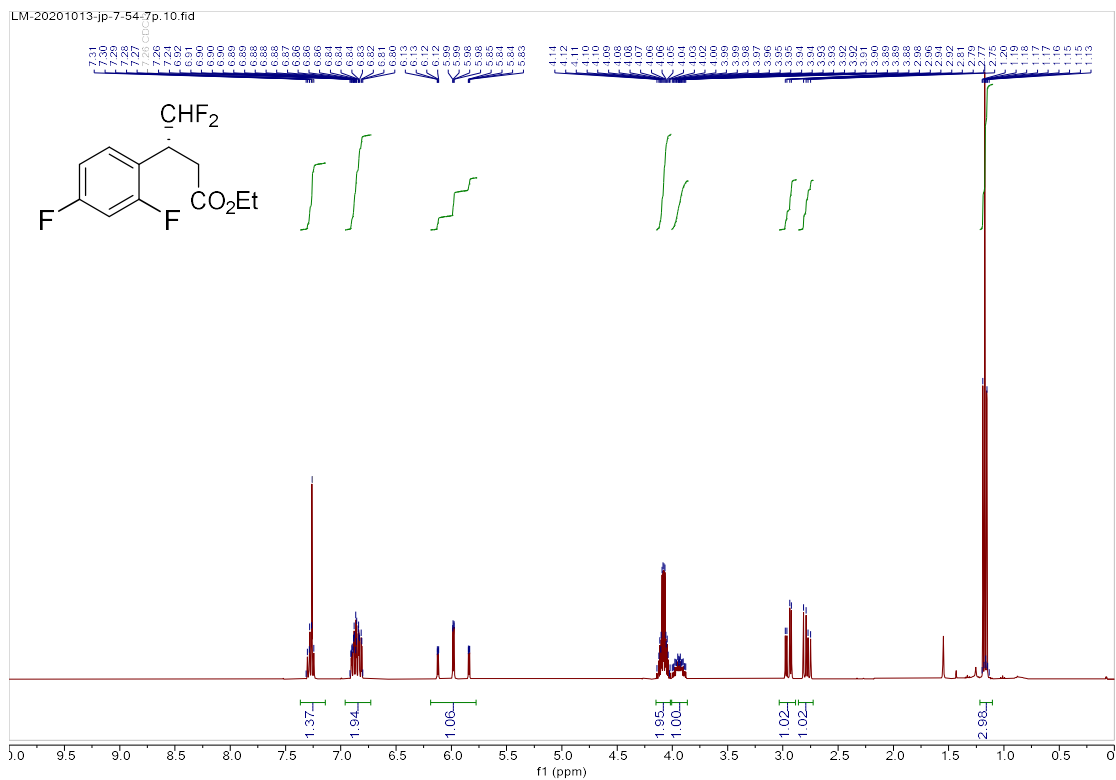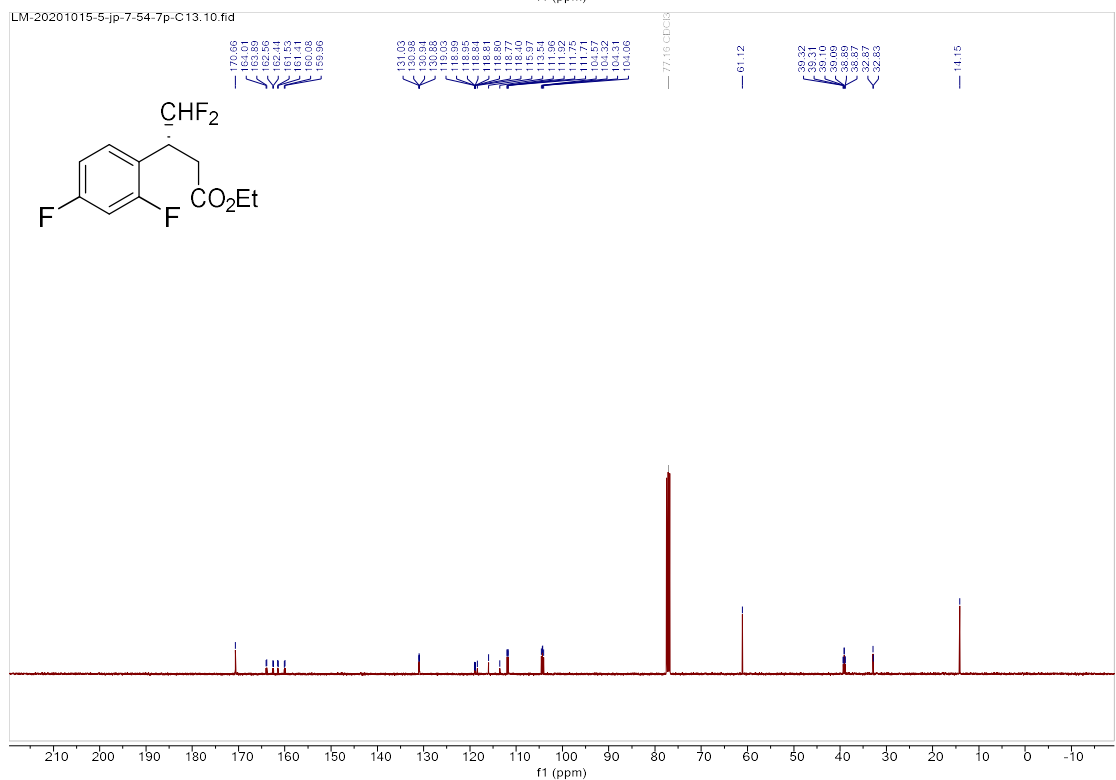

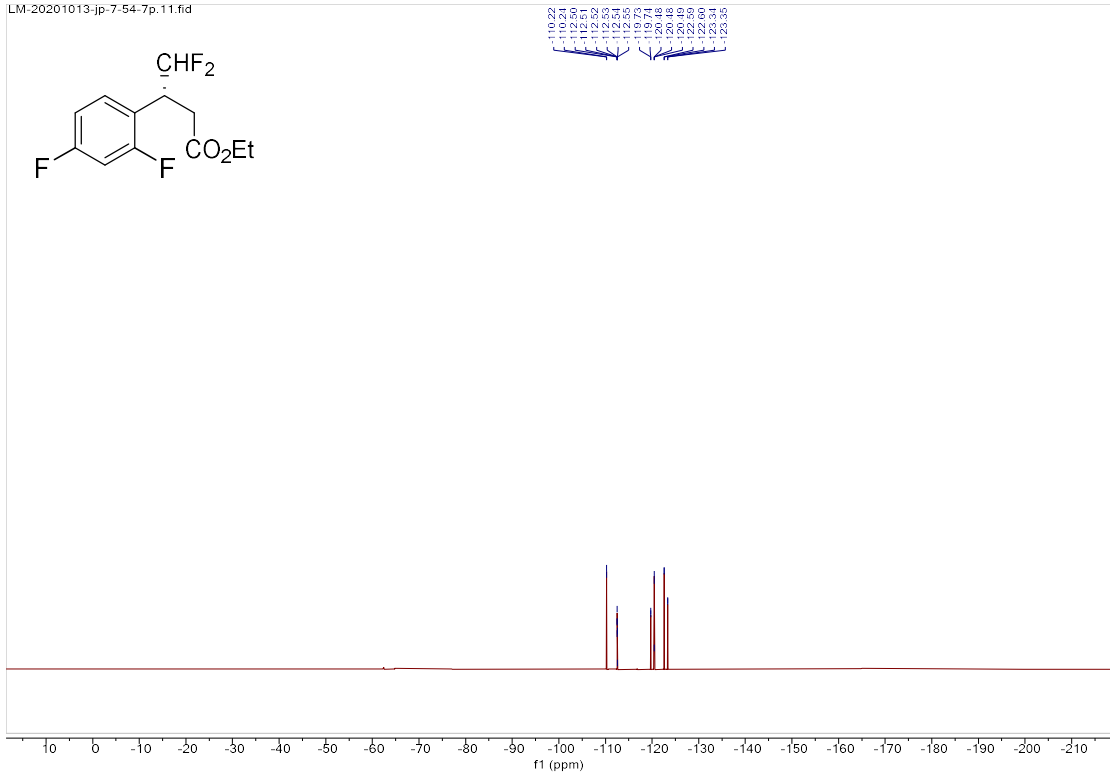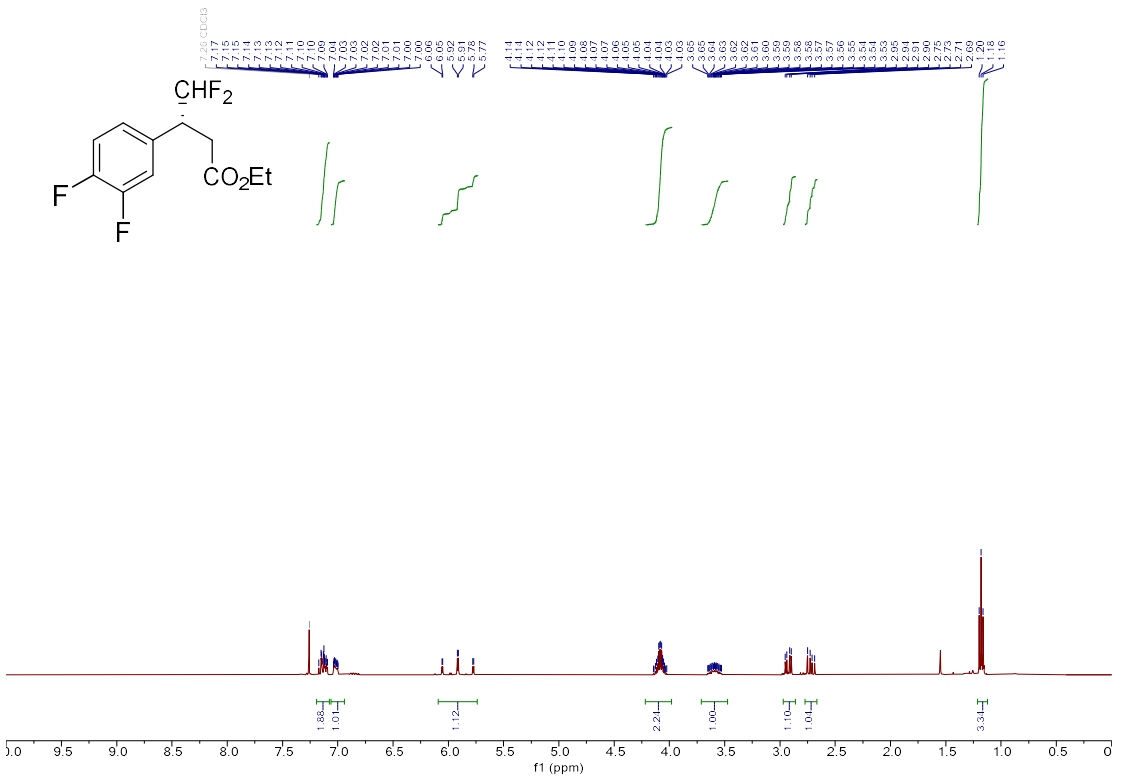

LM-20201013-jp-7-54-3p.3.fid

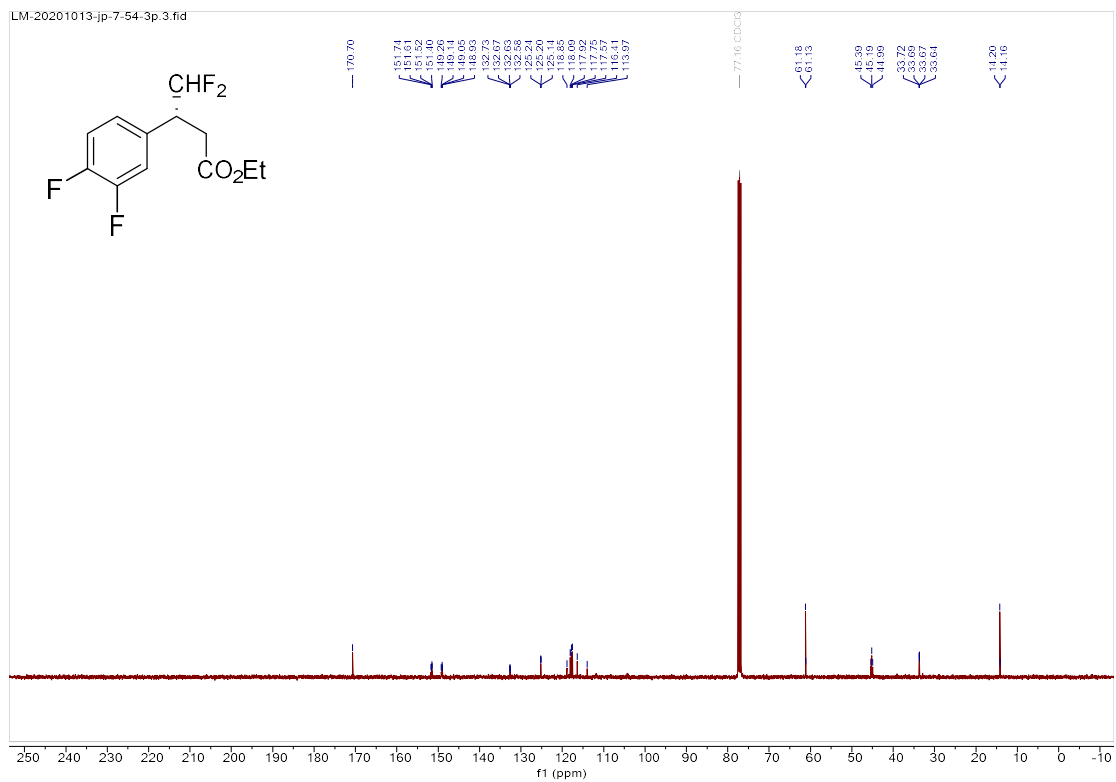

LM-20201013-jp-7-54-3p.2.fid

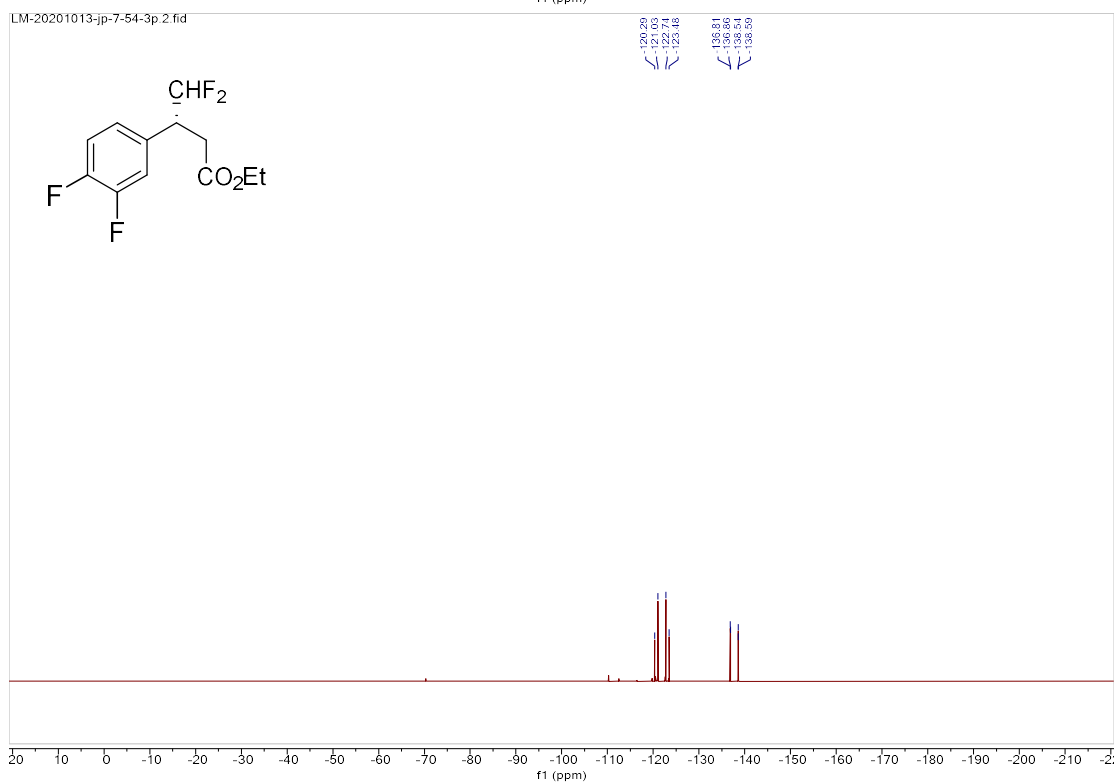

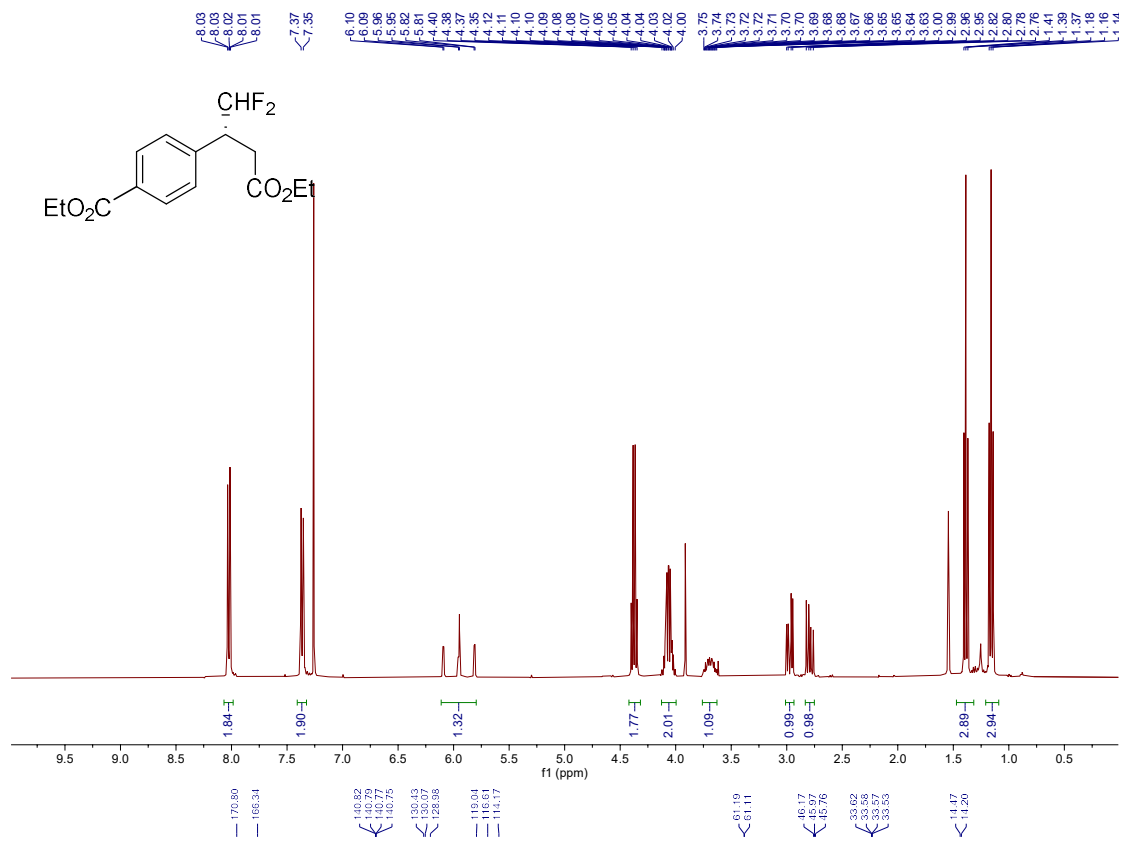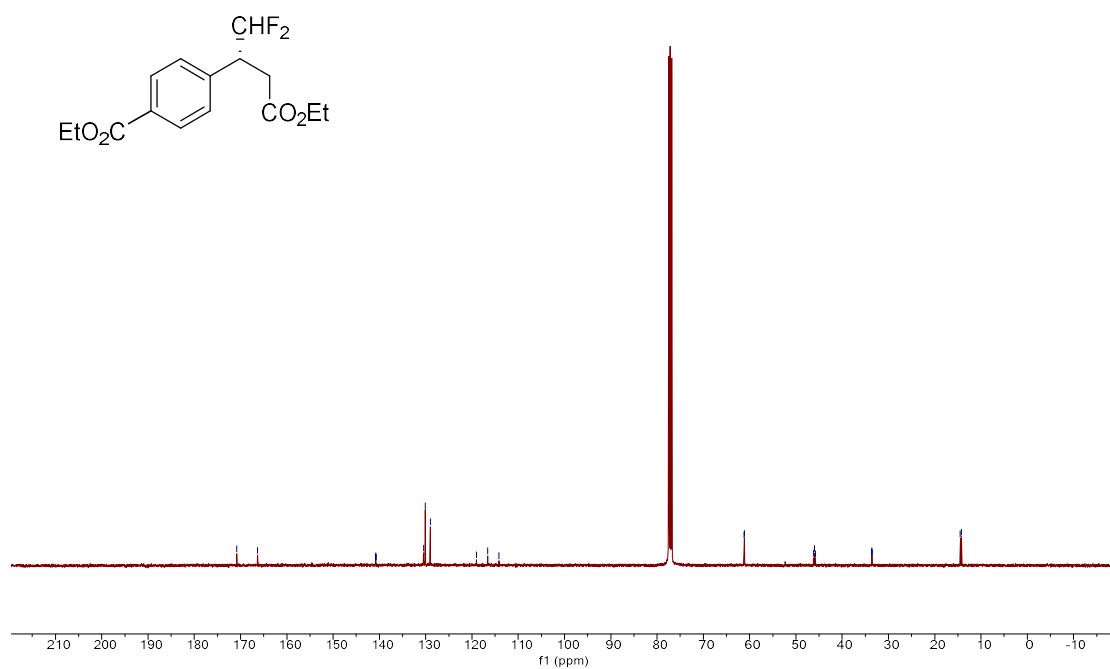

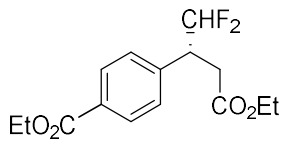

-119.63  
 -120.37  
 -122.57  
 -123.31

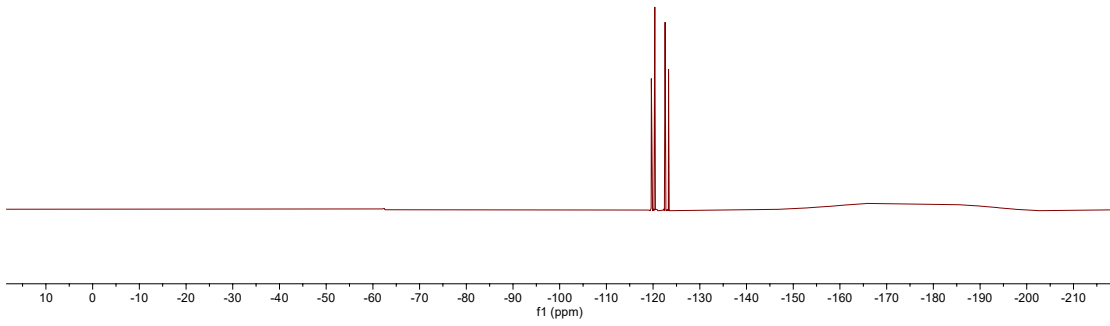

yanji-20201015-7-54-10p.1.fid

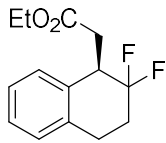

7.26  
 7.20  
 7.19  
 7.18  
 7.17  
 7.16  
 7.14  
 7.13  
 7.12  
 1.27  
 1.25  
 1.23  
 1.22  
 1.21  
 1.20  
 1.19  
 1.18  
 1.17  
 1.15  
 3.89  
 3.88  
 3.85  
 3.83  
 3.80  
 3.01  
 2.91  
 2.91  
 2.87  
 2.85  
 2.00  
 1.99  
 1.96  
 1.95  
 1.93  
 1.92  
 1.91  
 1.89  
 1.88  
 1.86  
 1.85  
 1.84  
 1.83  
 1.82  
 1.81  
 1.80  
 1.79  
 1.78  
 1.77  
 1.76  
 1.75  
 1.74  
 1.73  
 1.72  
 1.71  
 1.70  
 1.69  
 1.68  
 1.67  
 1.66  
 1.65  
 1.64  
 1.63  
 1.62  
 1.61  
 1.60  
 1.59  
 1.58  
 1.57  
 1.56  
 1.55  
 1.54  
 1.53  
 1.52  
 1.51  
 1.50  
 1.49  
 1.48  
 1.47  
 1.46  
 1.45  
 1.44  
 1.43  
 1.42  
 1.41  
 1.40  
 1.39  
 1.38  
 1.37  
 1.36  
 1.35  
 1.34  
 1.33  
 1.32  
 1.31  
 1.30  
 1.29  
 1.28  
 1.27  
 1.26  
 1.25  
 1.24  
 1.23  
 1.22  
 1.21  
 1.20  
 1.19  
 1.18  
 1.17  
 1.16  
 1.15  
 1.14  
 1.13  
 1.12  
 1.11  
 1.10  
 1.09  
 1.08  
 1.07  
 1.06  
 1.05  
 1.04  
 1.03  
 1.02  
 1.01  
 1.00  
 0.99  
 0.98  
 0.97  
 0.96  
 0.95  
 0.94  
 0.93  
 0.92  
 0.91  
 0.90  
 0.89  
 0.88  
 0.87  
 0.86  
 0.85  
 0.84  
 0.83  
 0.82  
 0.81  
 0.80  
 0.79  
 0.78  
 0.77  
 0.76  
 0.75  
 0.74  
 0.73  
 0.72  
 0.71  
 0.70  
 0.69  
 0.68  
 0.67  
 0.66  
 0.65  
 0.64  
 0.63  
 0.62  
 0.61  
 0.60  
 0.59  
 0.58  
 0.57  
 0.56  
 0.55  
 0.54  
 0.53  
 0.52  
 0.51  
 0.50  
 0.49  
 0.48  
 0.47  
 0.46  
 0.45  
 0.44  
 0.43  
 0.42  
 0.41  
 0.40  
 0.39  
 0.38  
 0.37  
 0.36  
 0.35  
 0.34  
 0.33  
 0.32  
 0.31  
 0.30  
 0.29  
 0.28  
 0.27  
 0.26  
 0.25  
 0.24  
 0.23  
 0.22  
 0.21  
 0.20  
 0.19  
 0.18  
 0.17  
 0.16  
 0.15  
 0.14  
 0.13  
 0.12  
 0.11  
 0.10  
 0.09  
 0.08  
 0.07  
 0.06  
 0.05  
 0.04  
 0.03  
 0.02  
 0.01  
 0.00

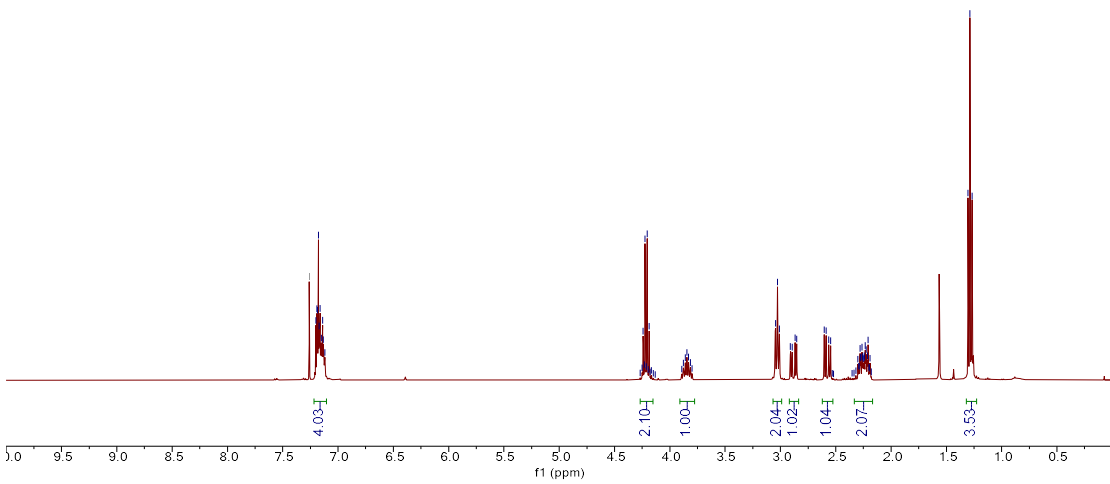

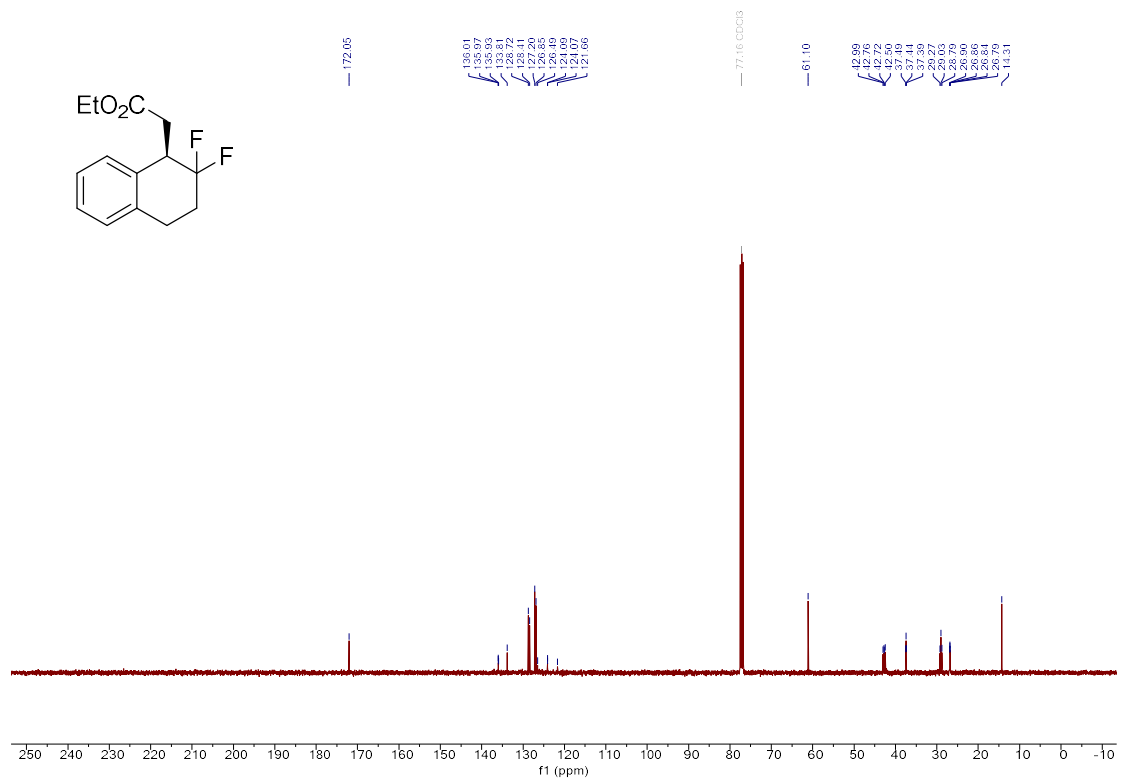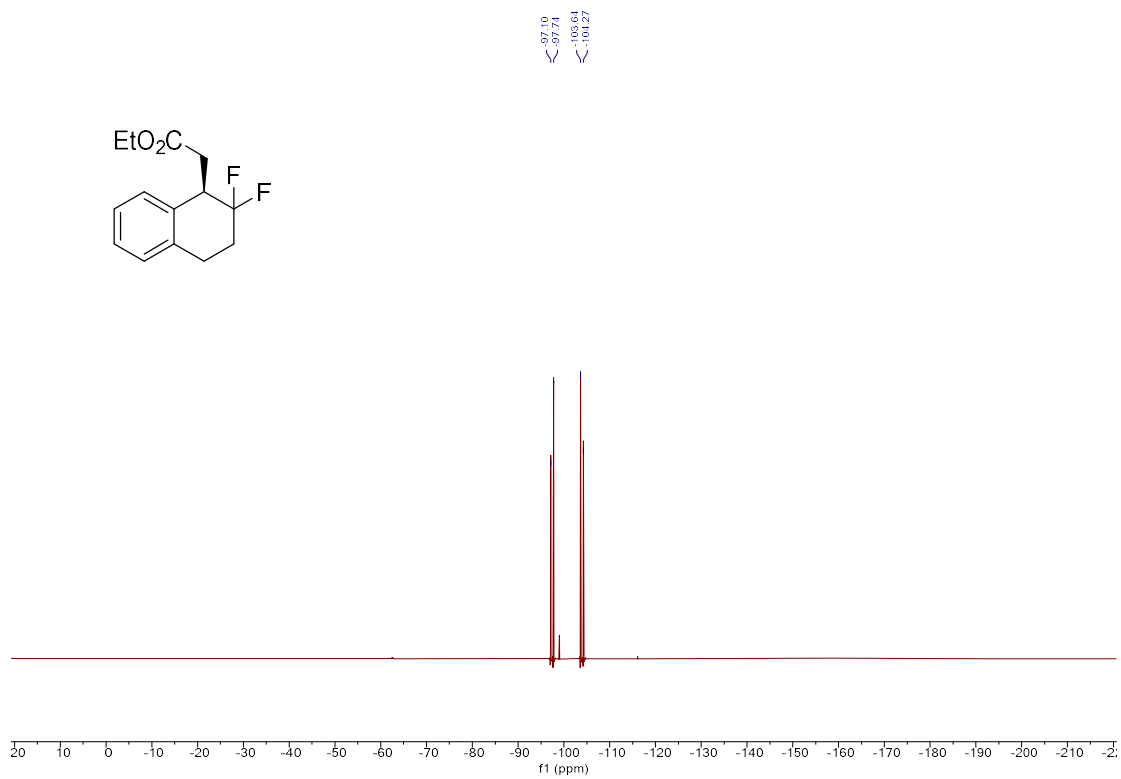



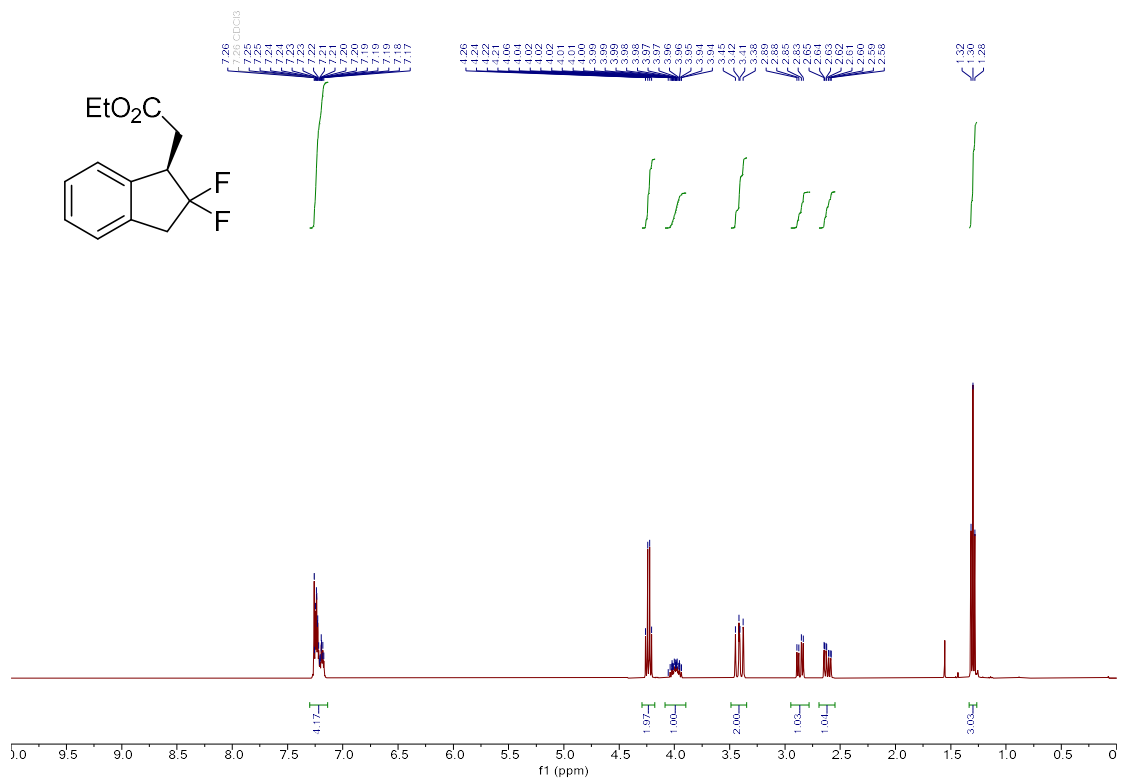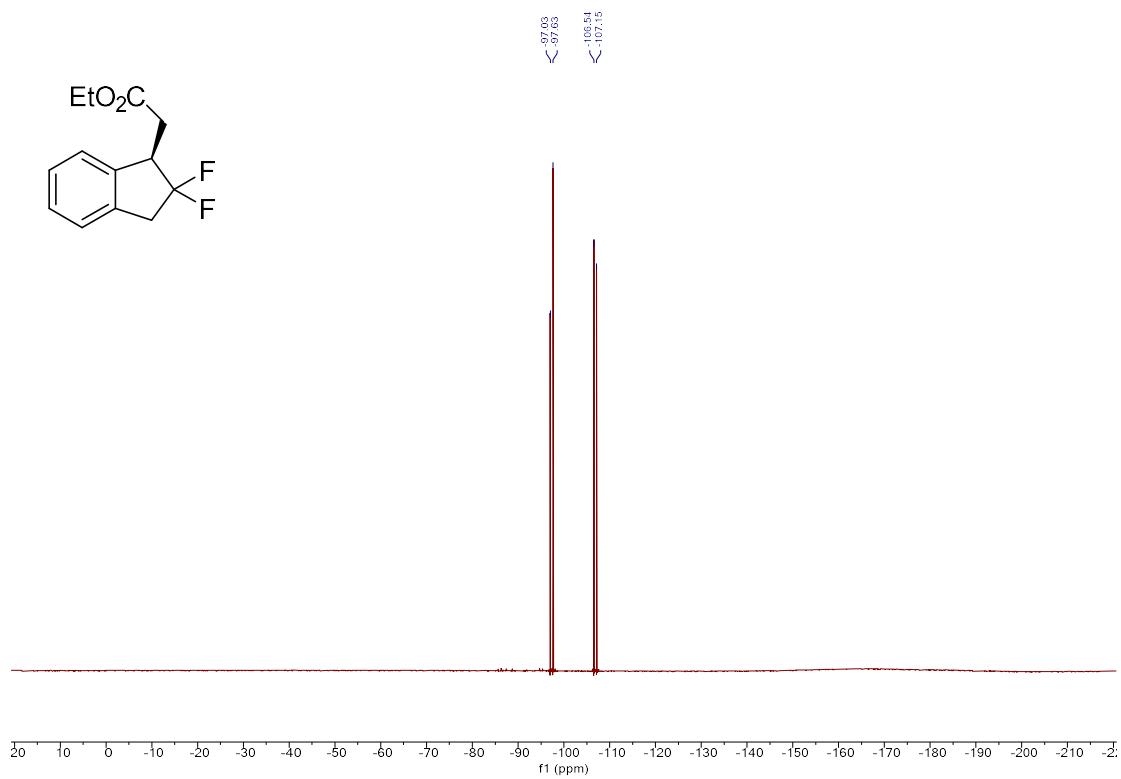

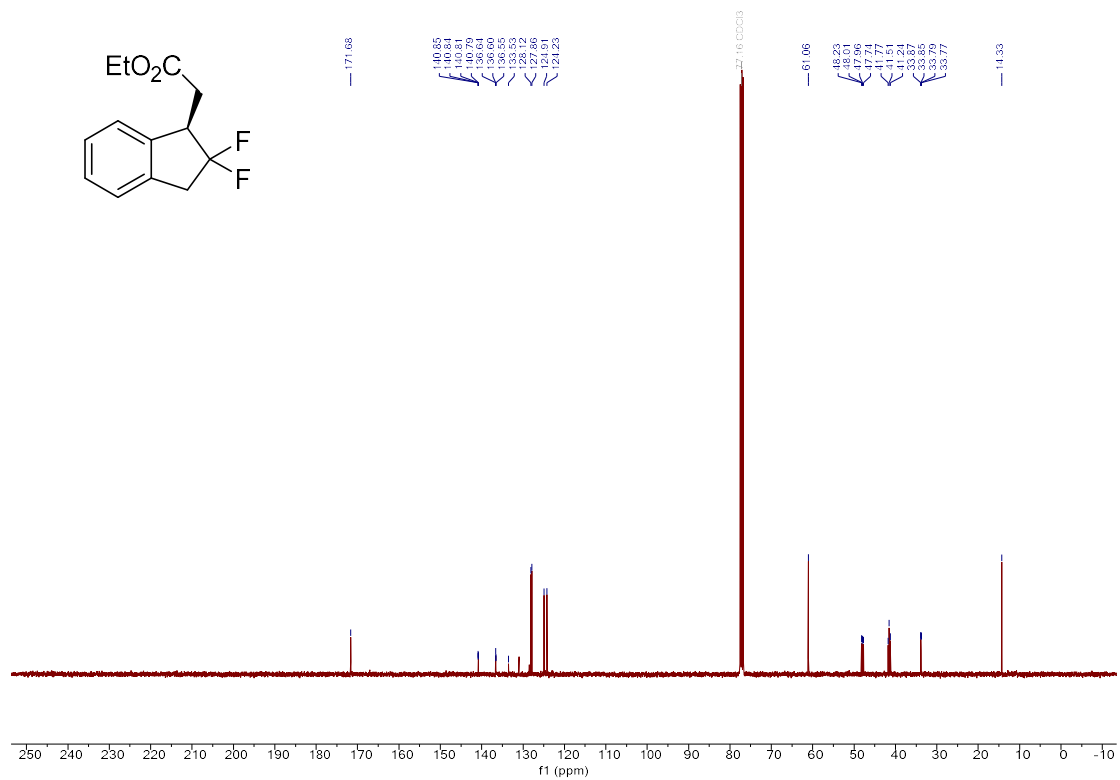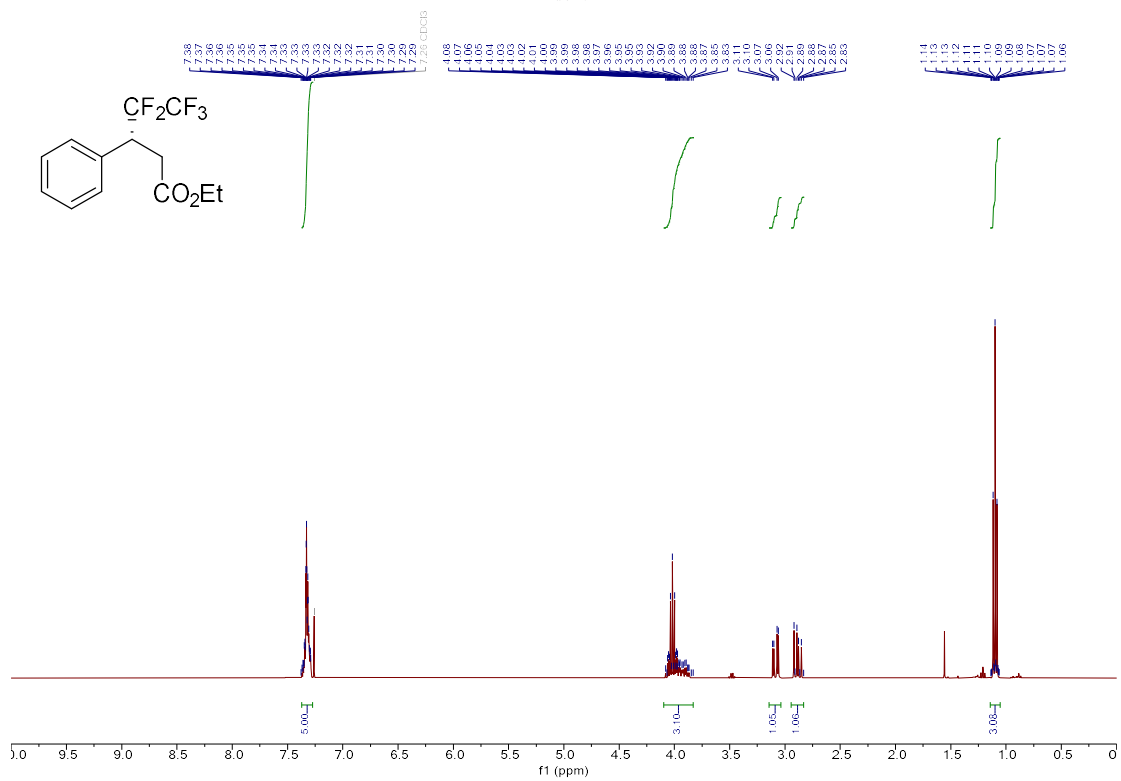

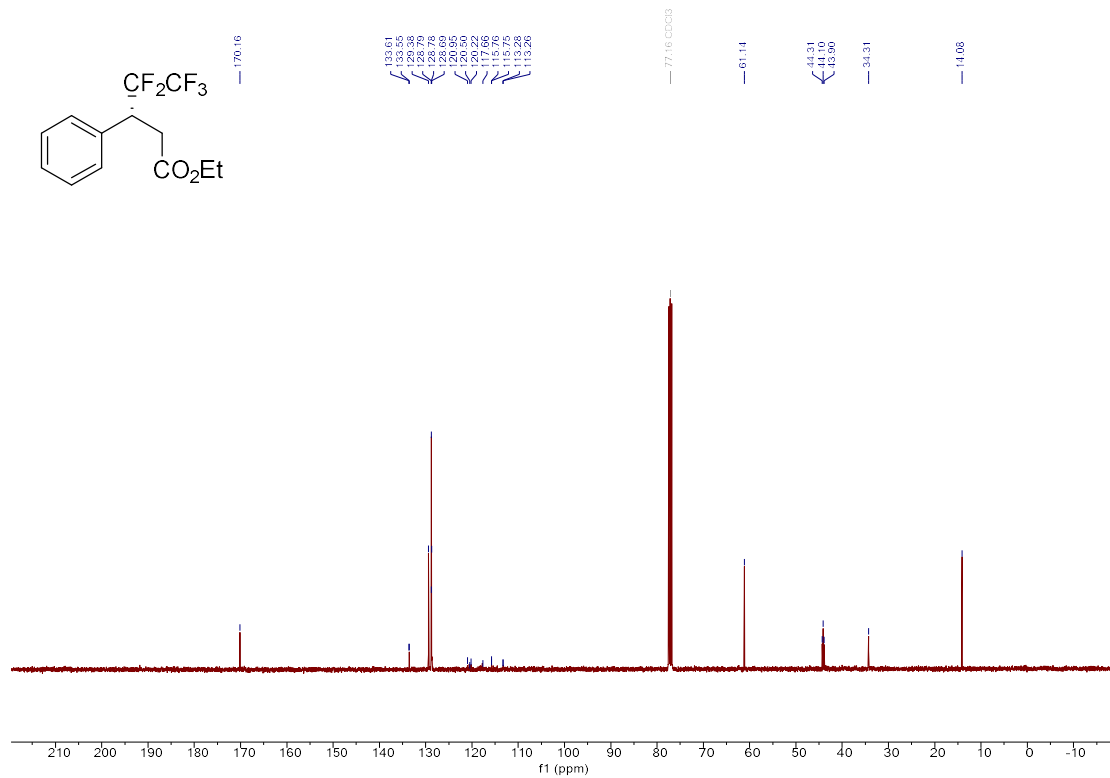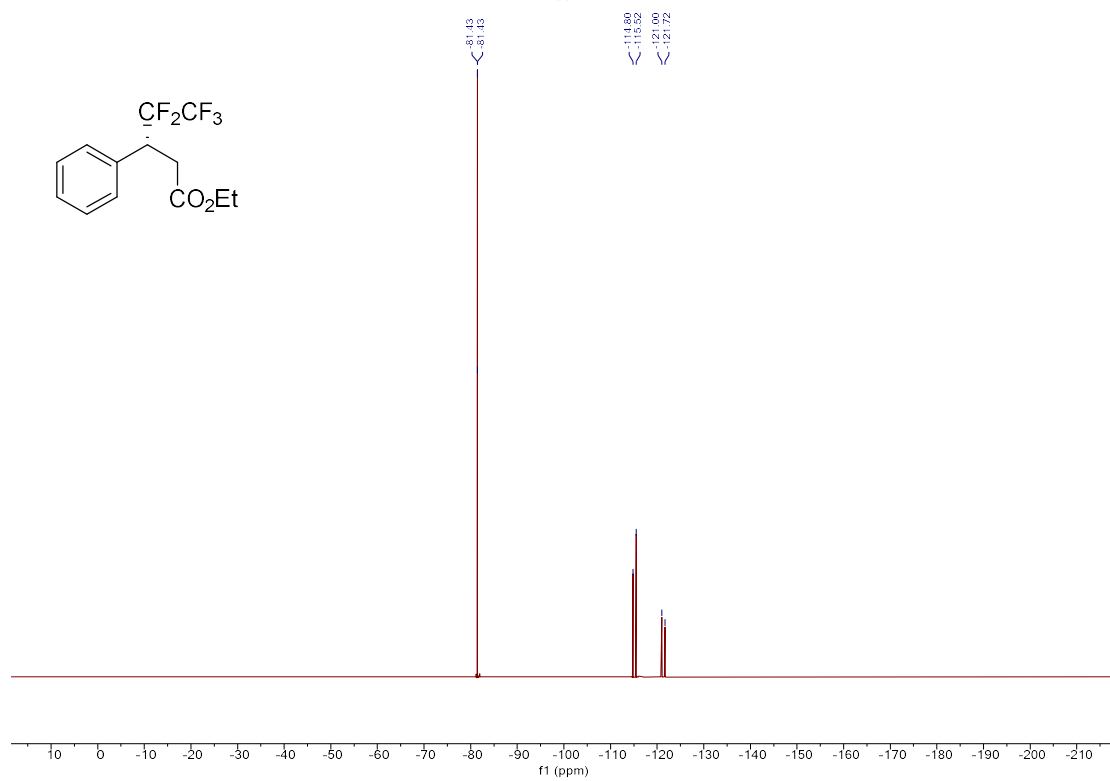

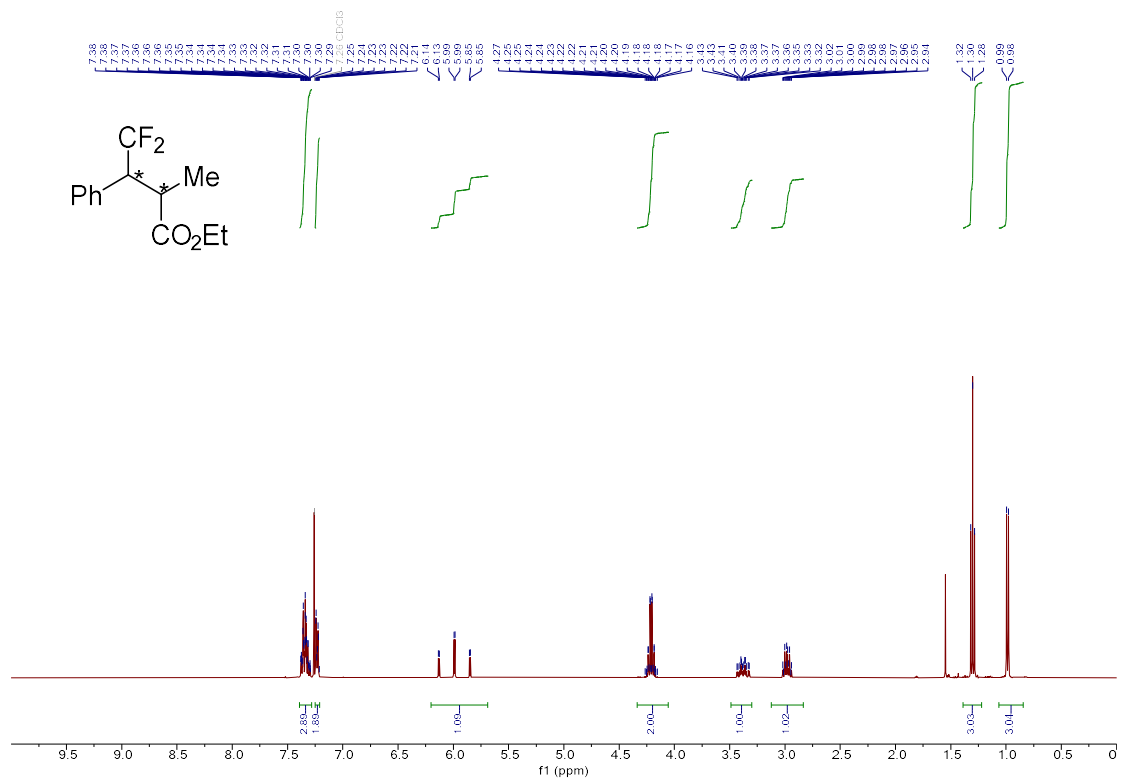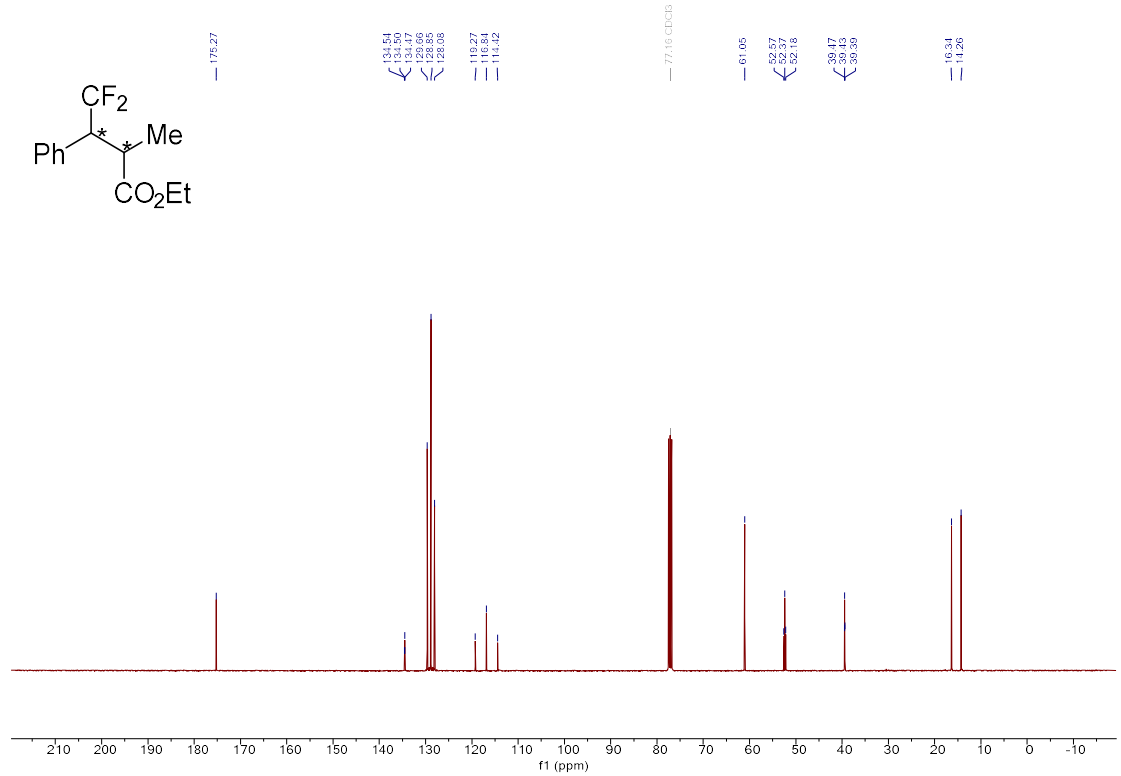

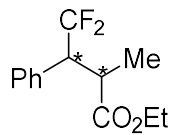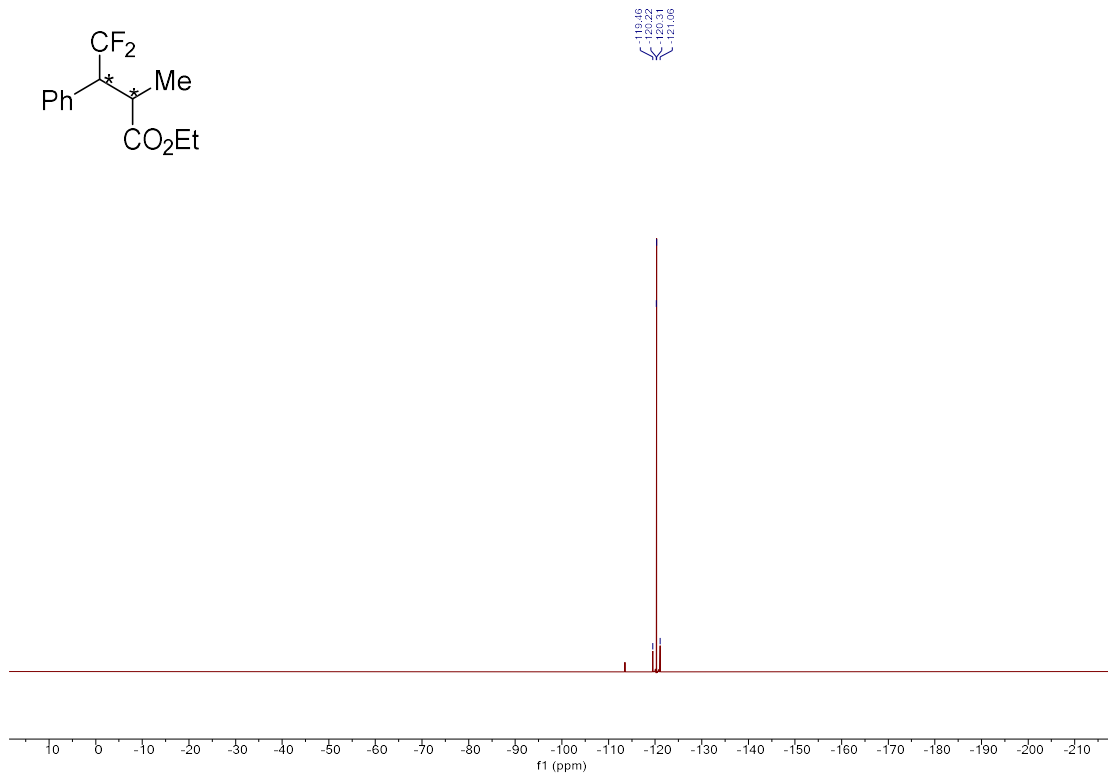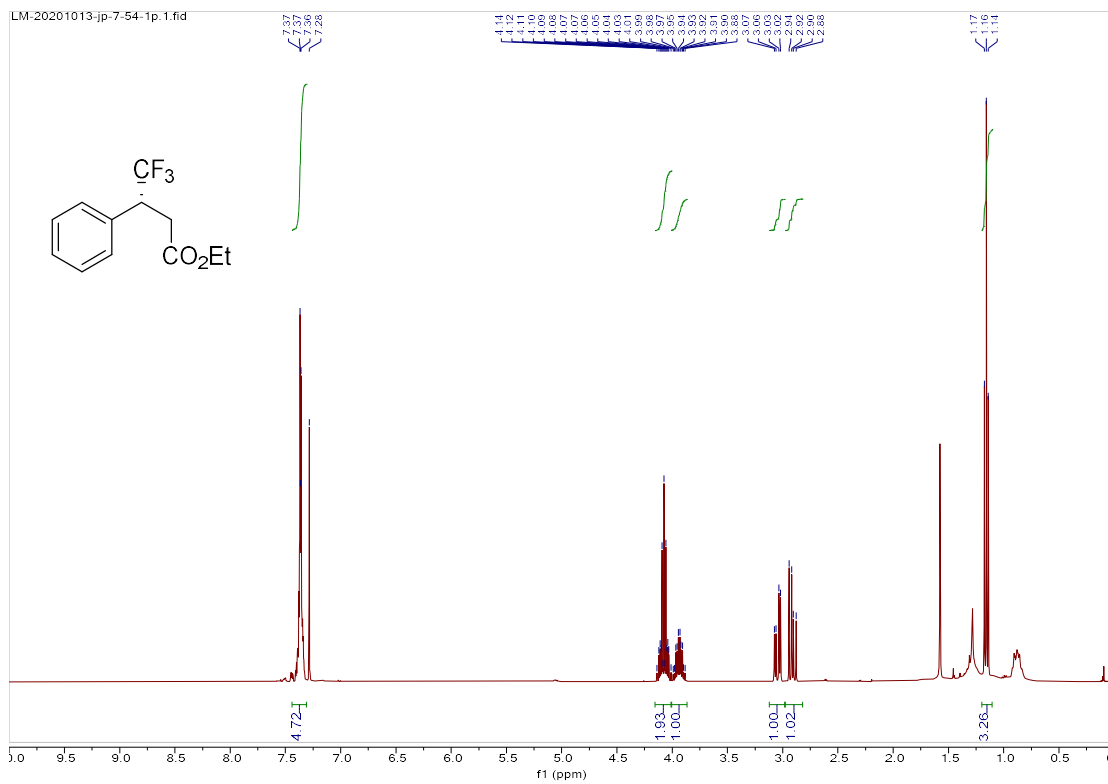

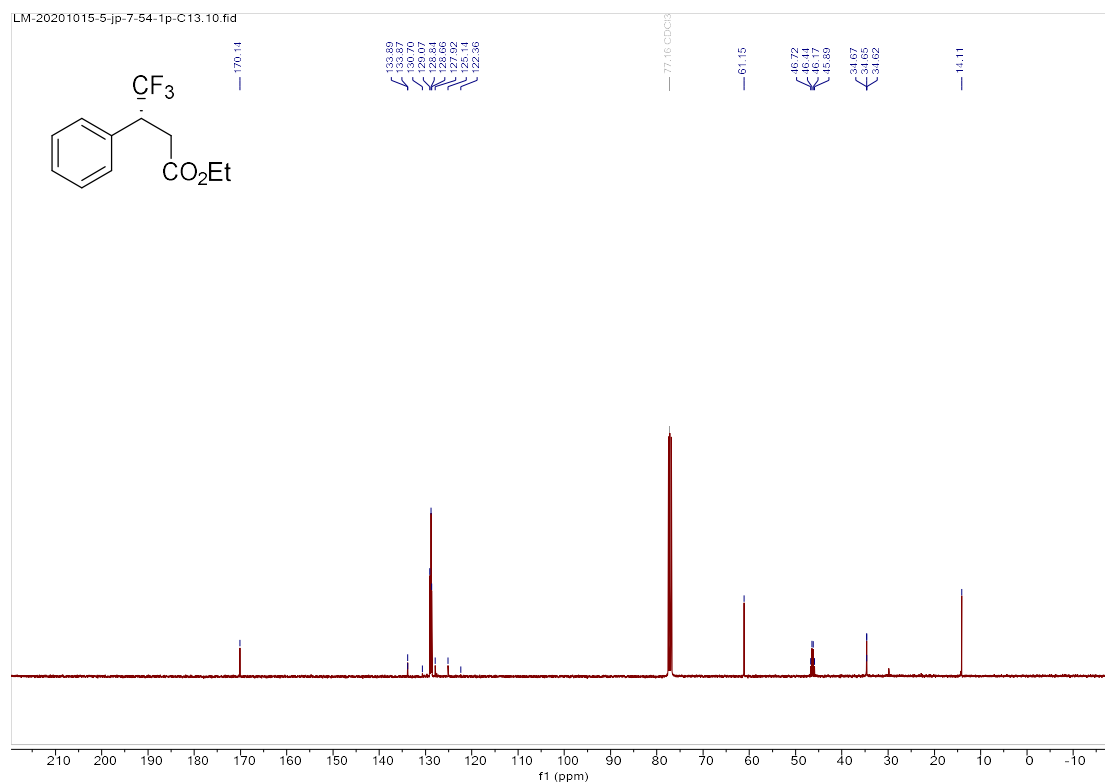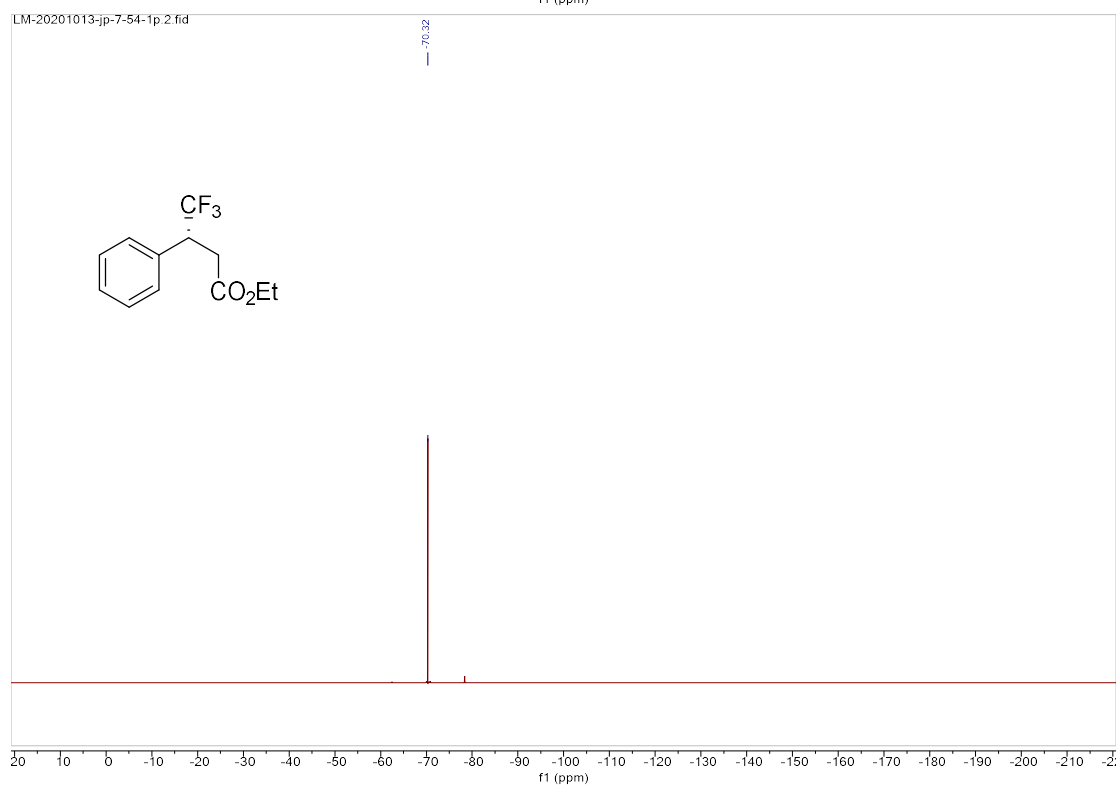



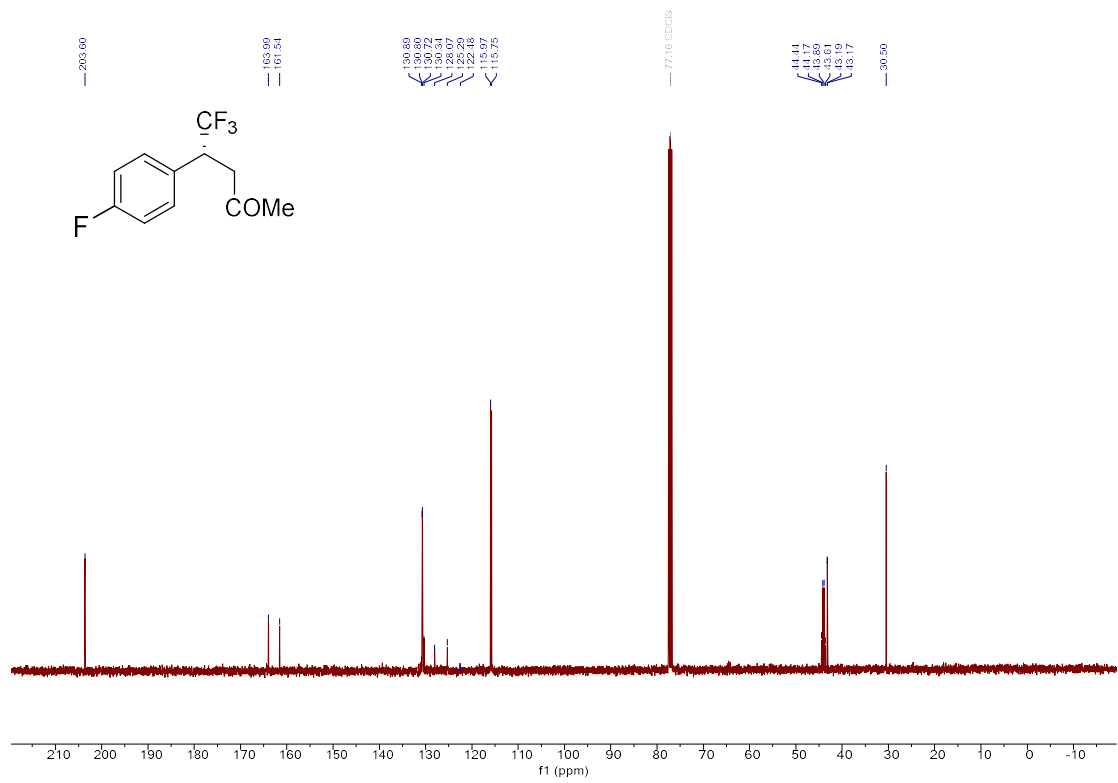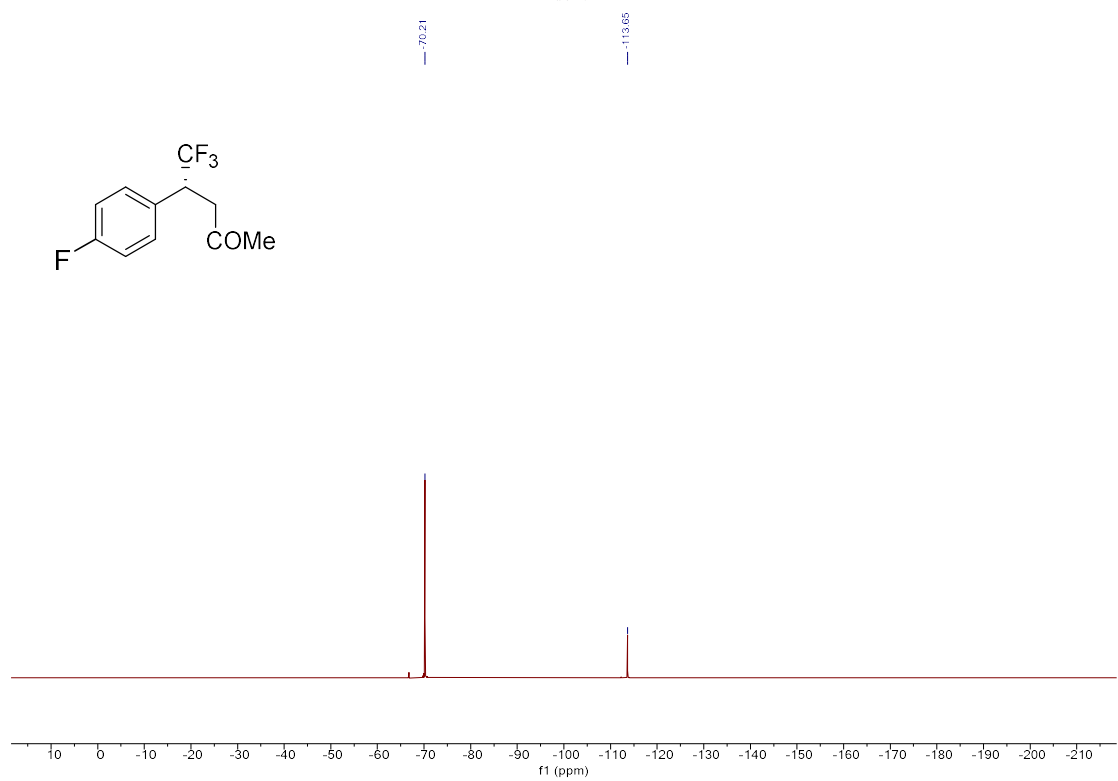





SP-181028-77L/10

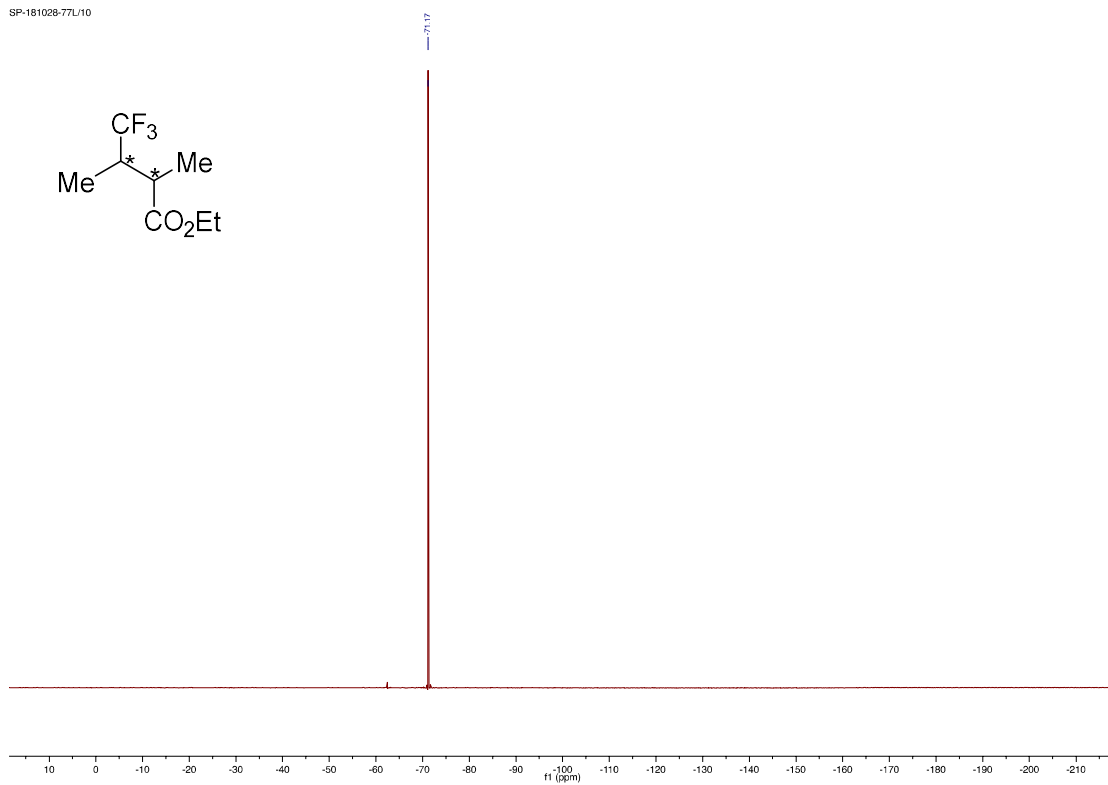

SP-181028-779L/10

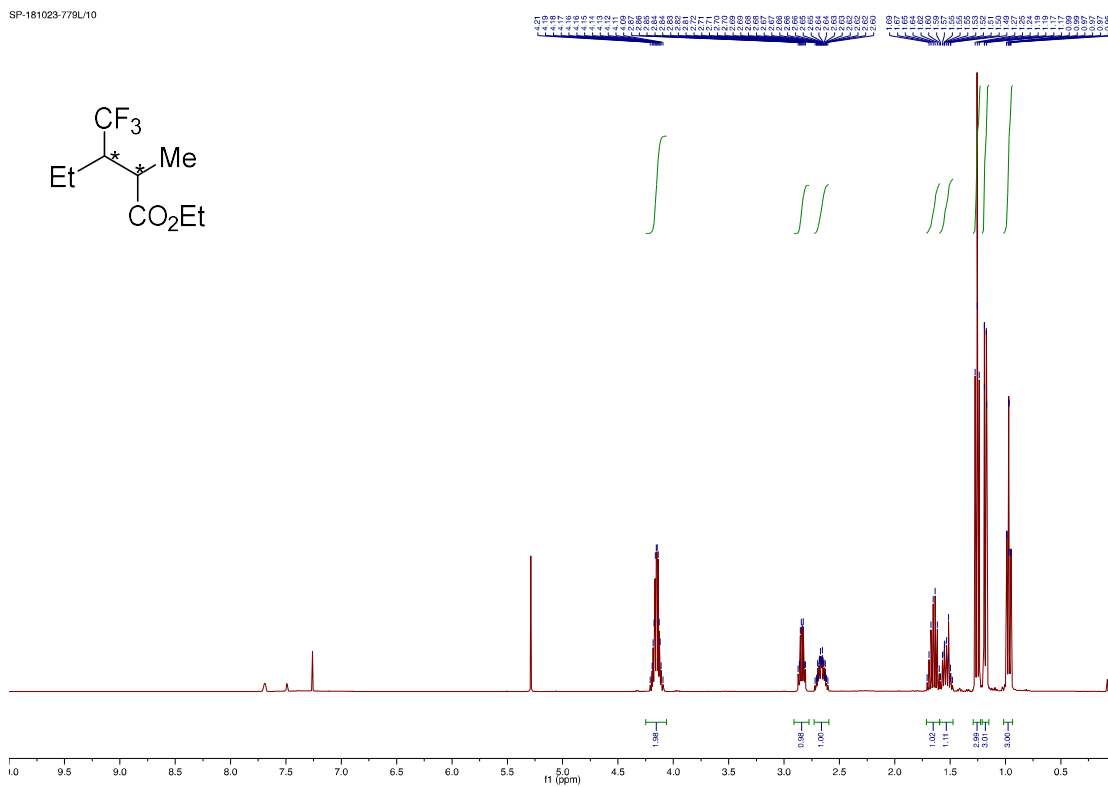

SP-181023-779L/12

173.44

130.00  
129.00  
128.00

61.09

46.00  
45.00  
44.00  
43.00  
42.00

15.00  
14.00  
13.00  
12.00  
11.00  
10.00

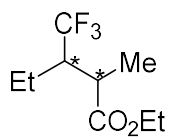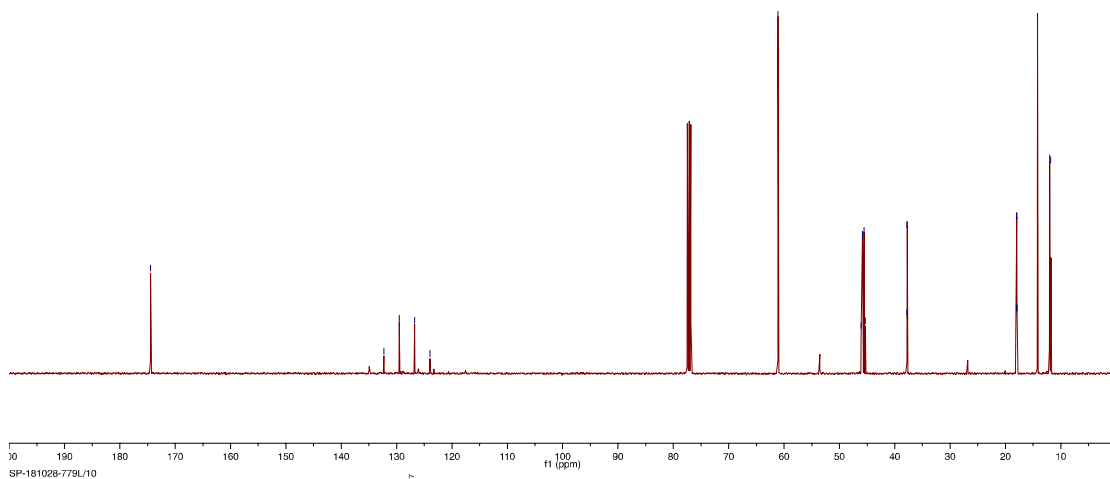

SP-181028-779L/10

67.77

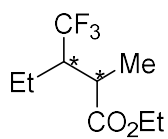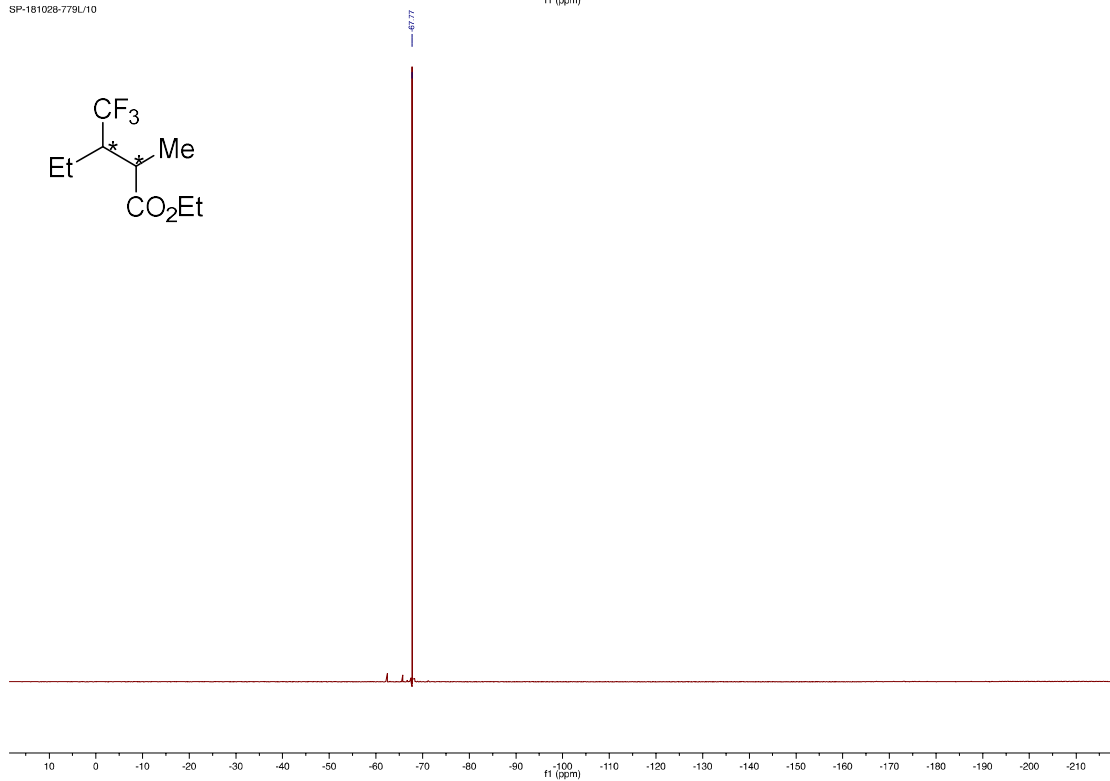



17.00

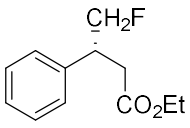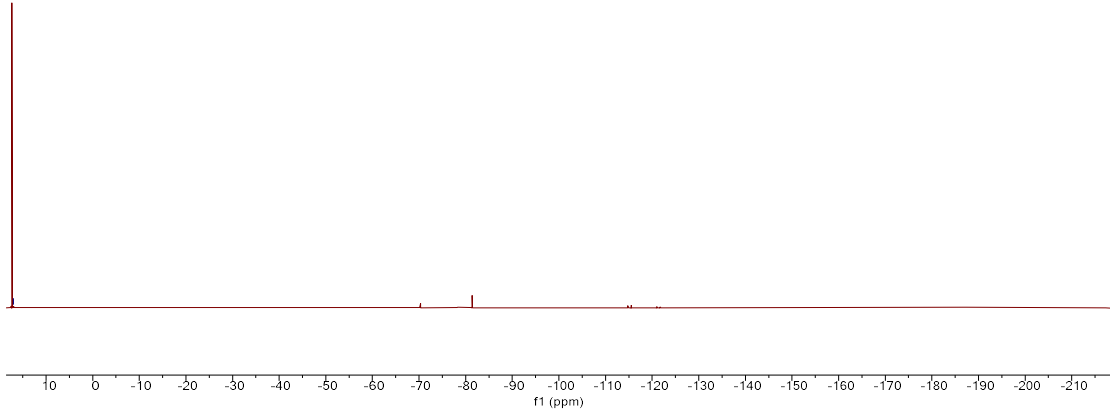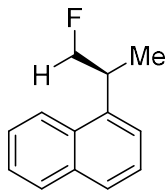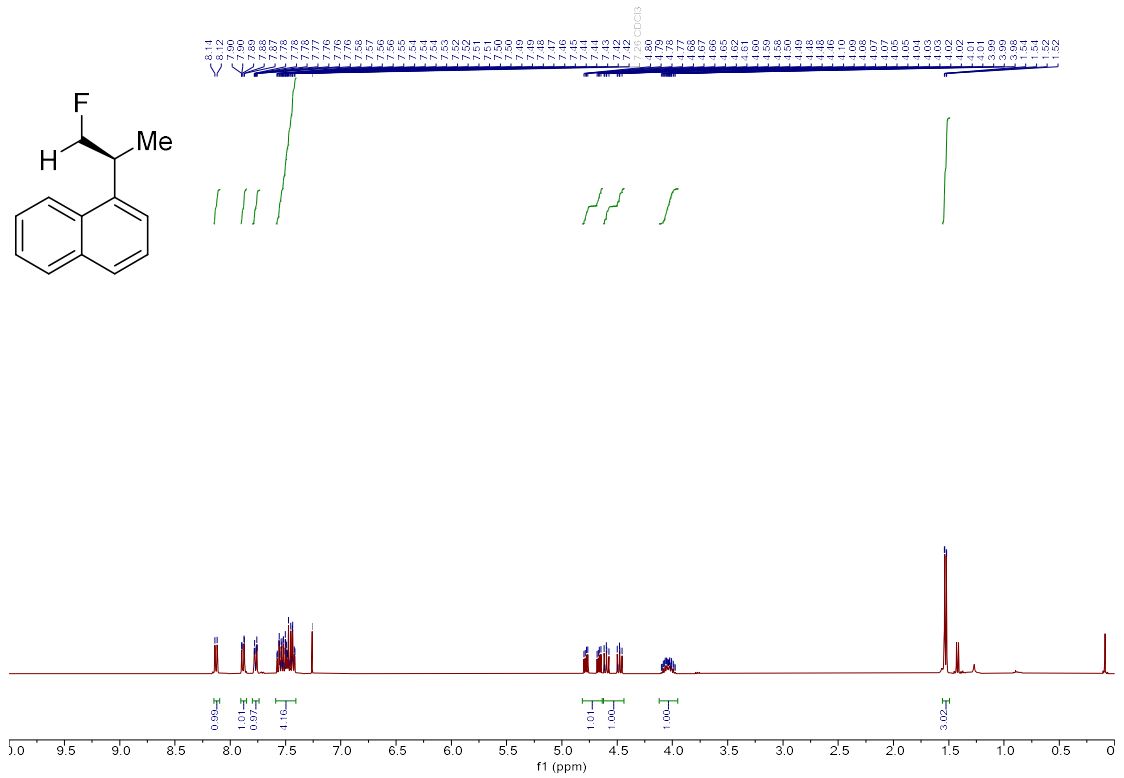

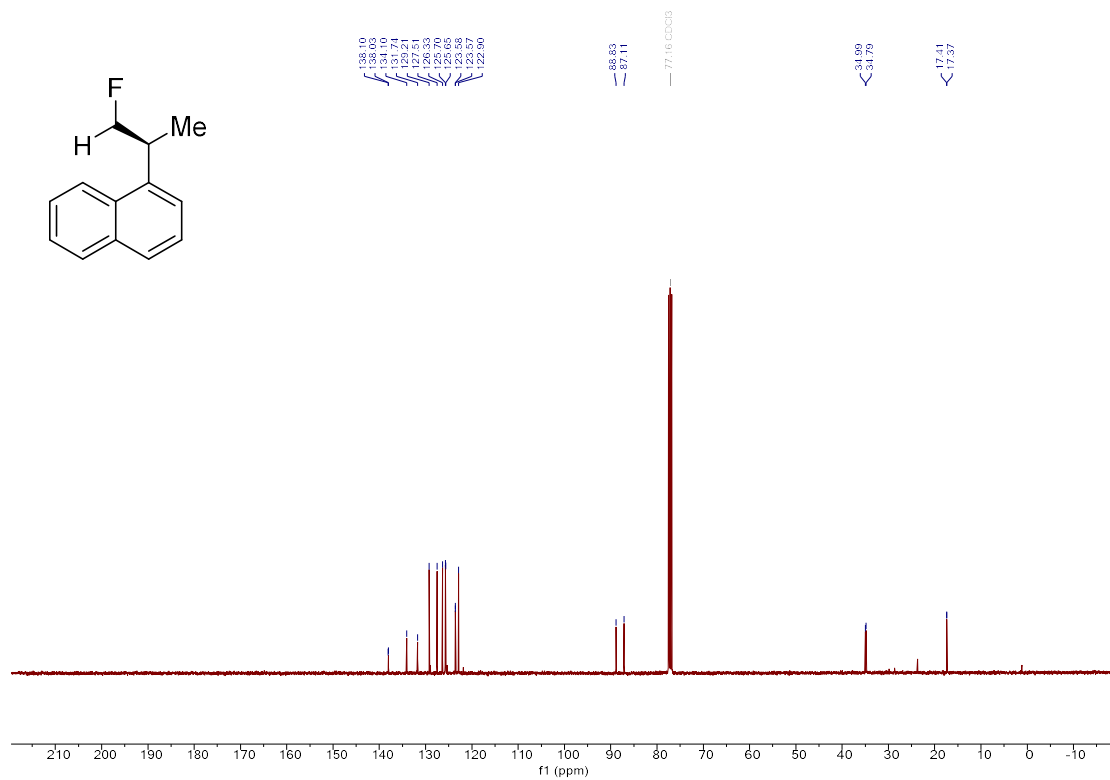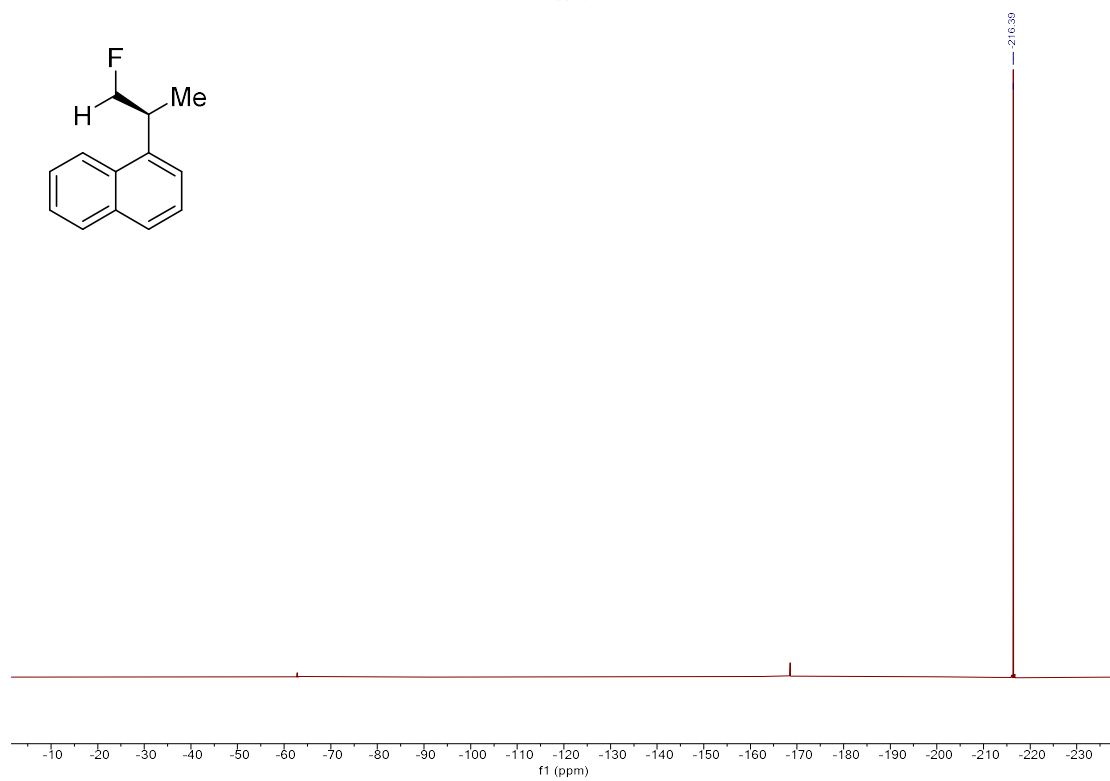

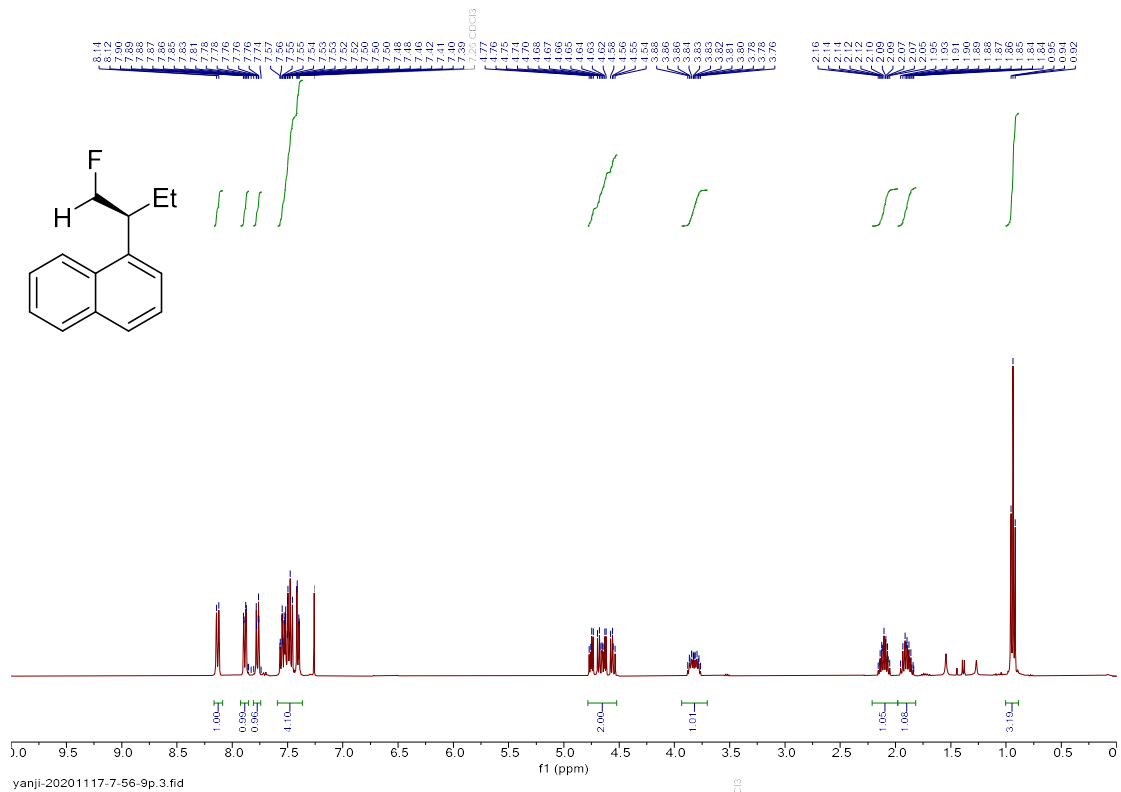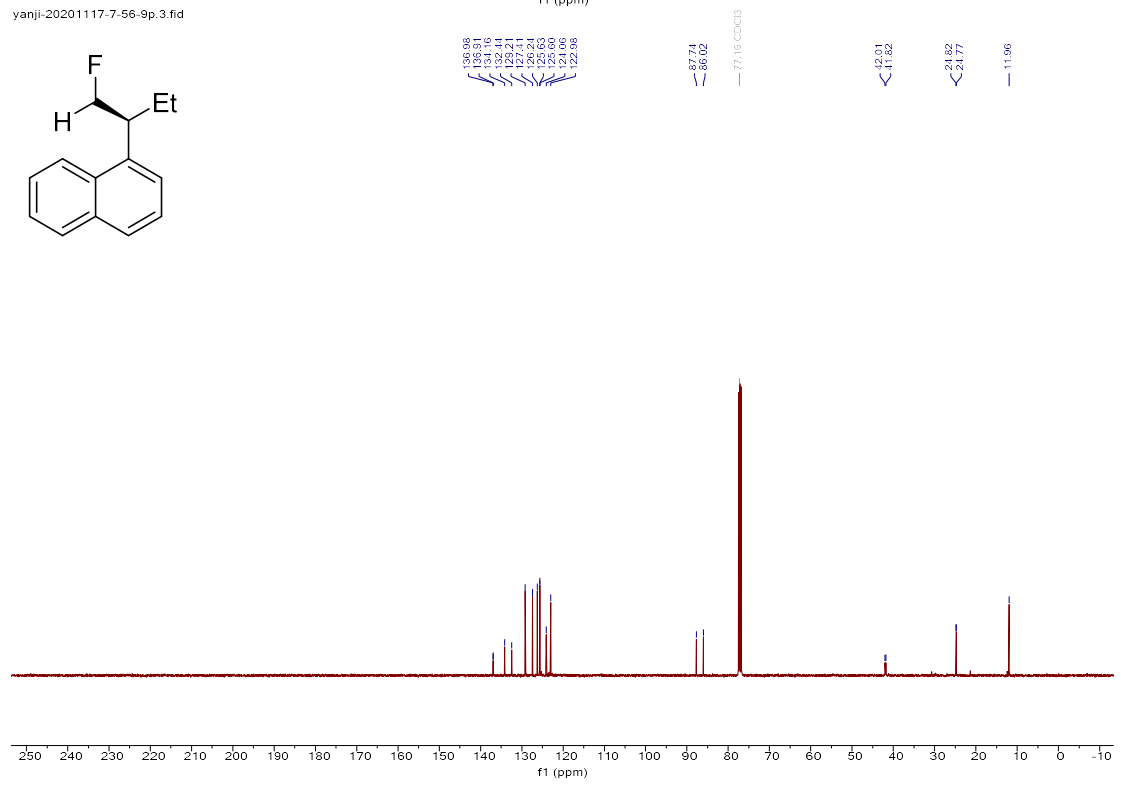

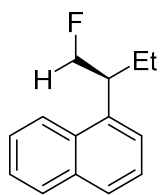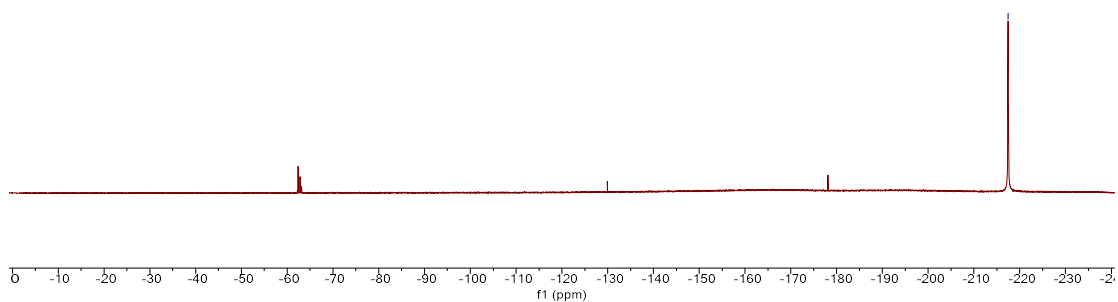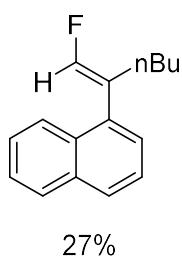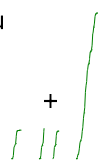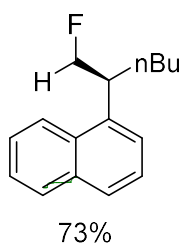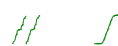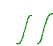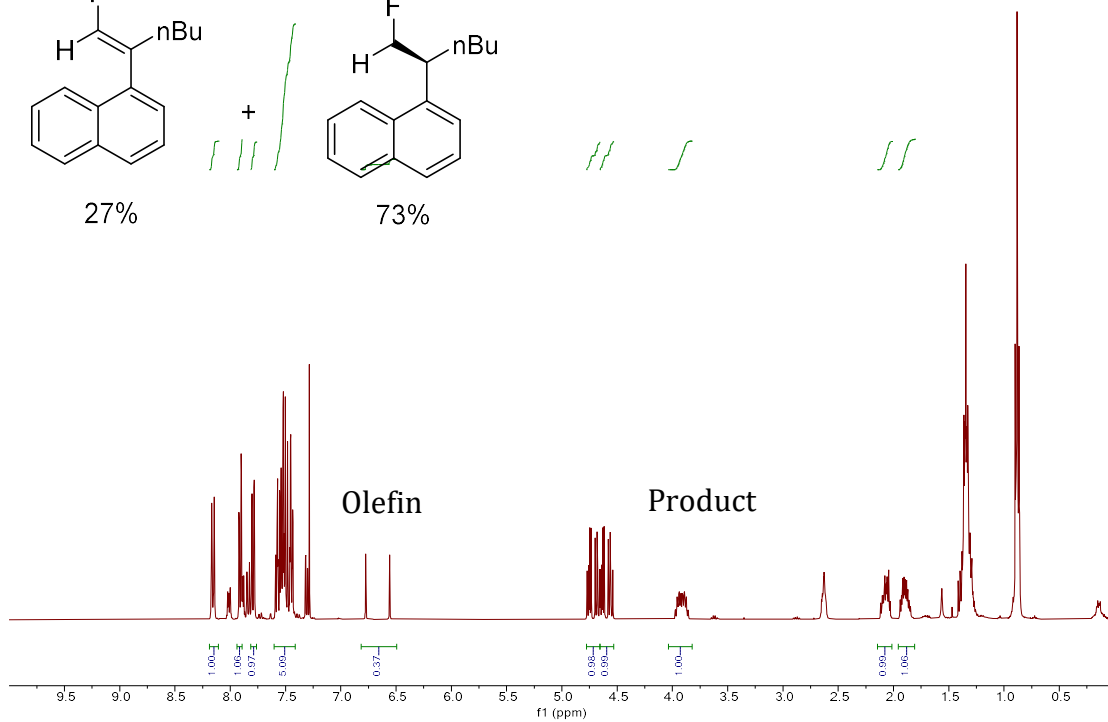



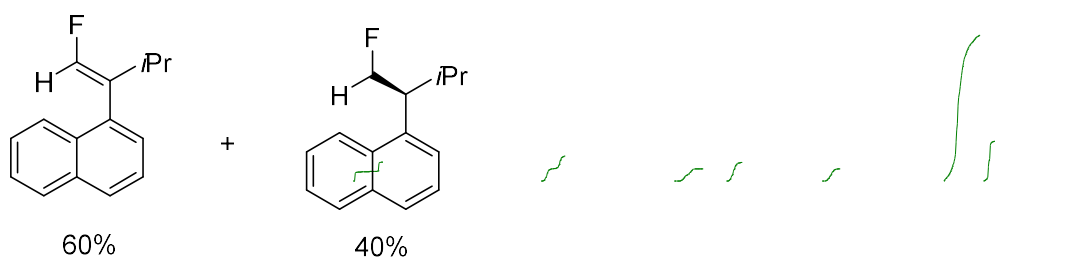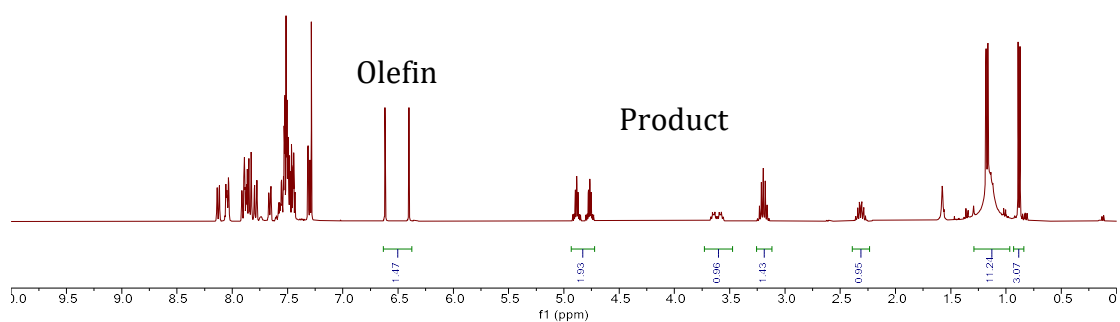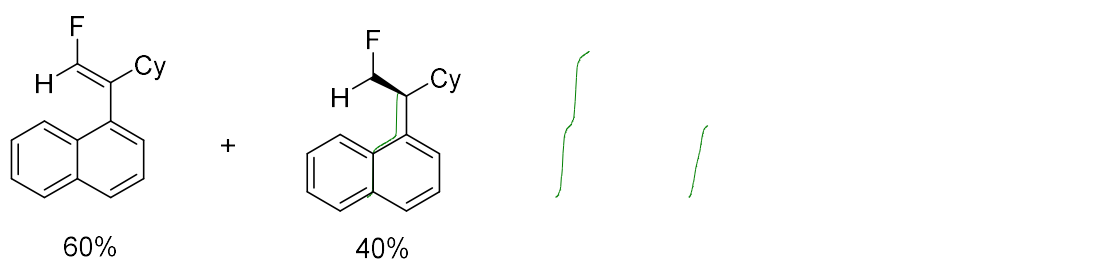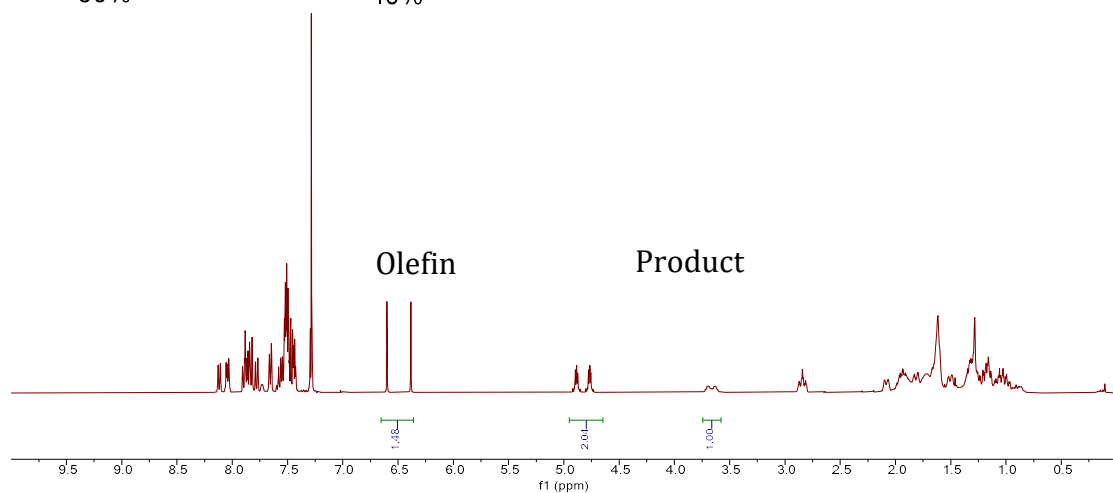

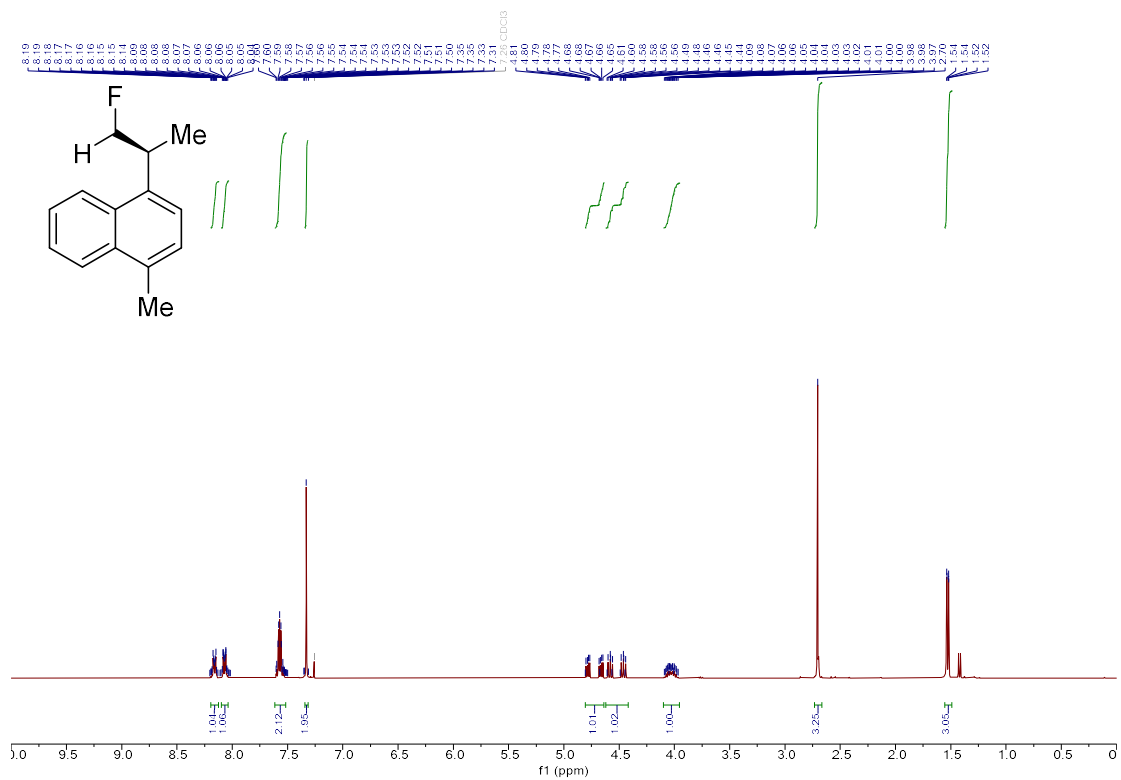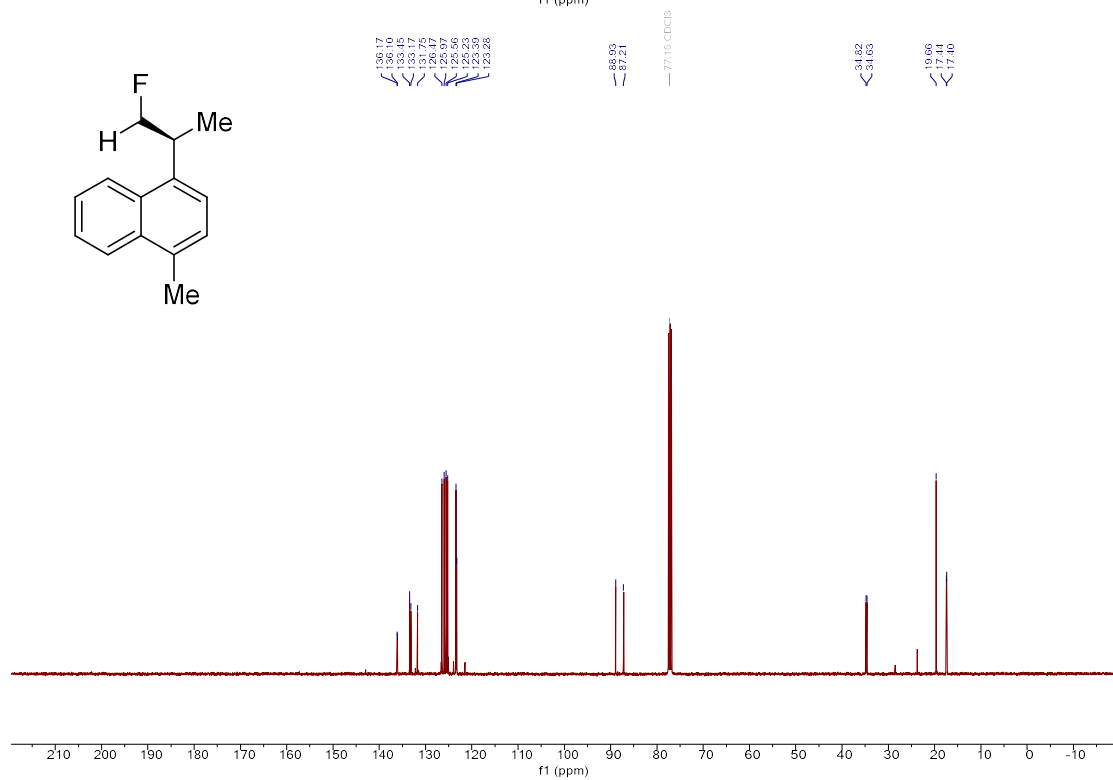

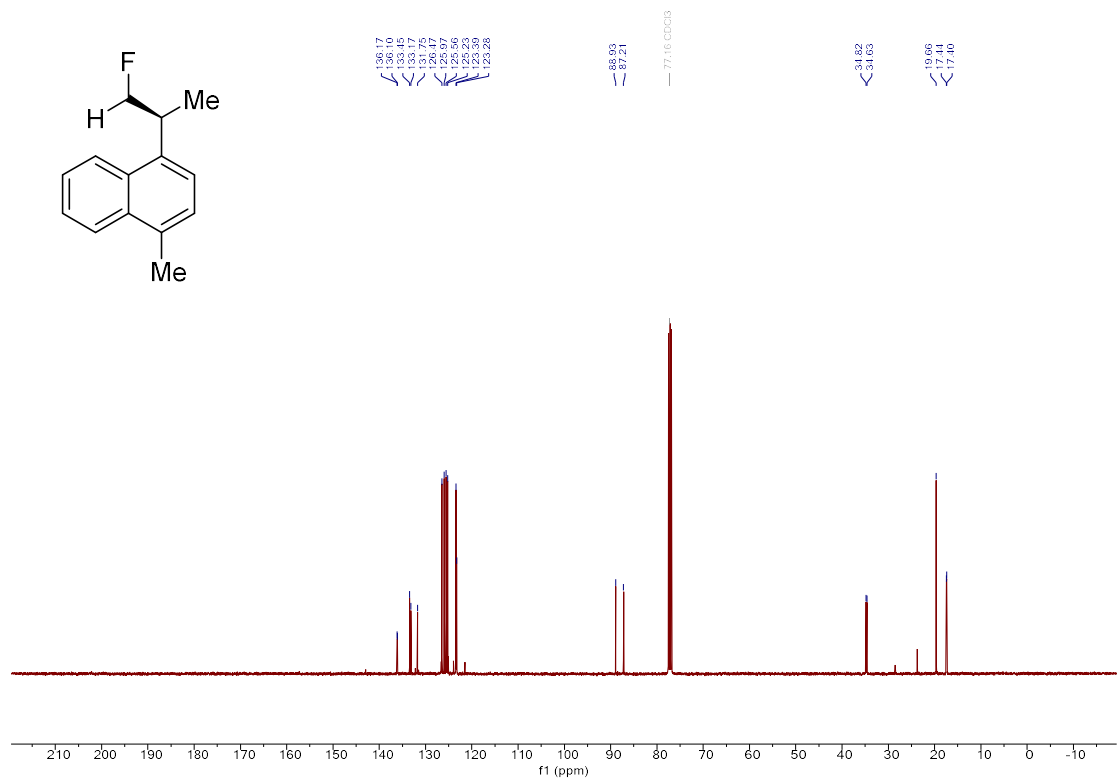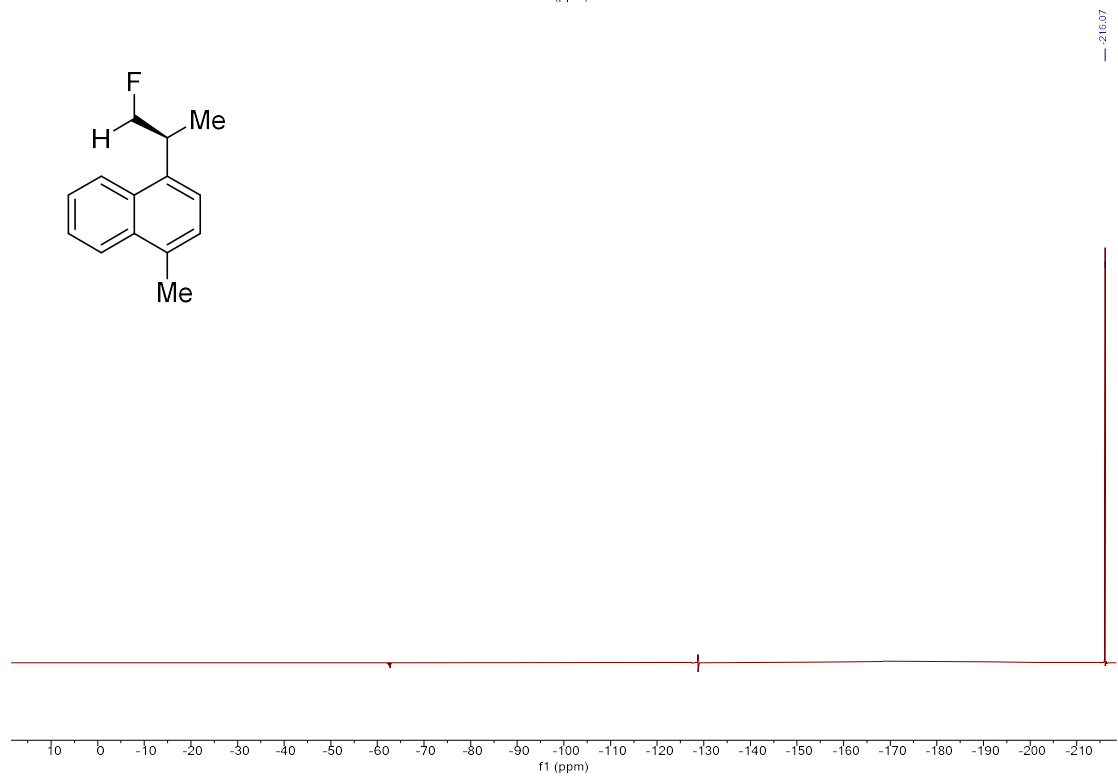



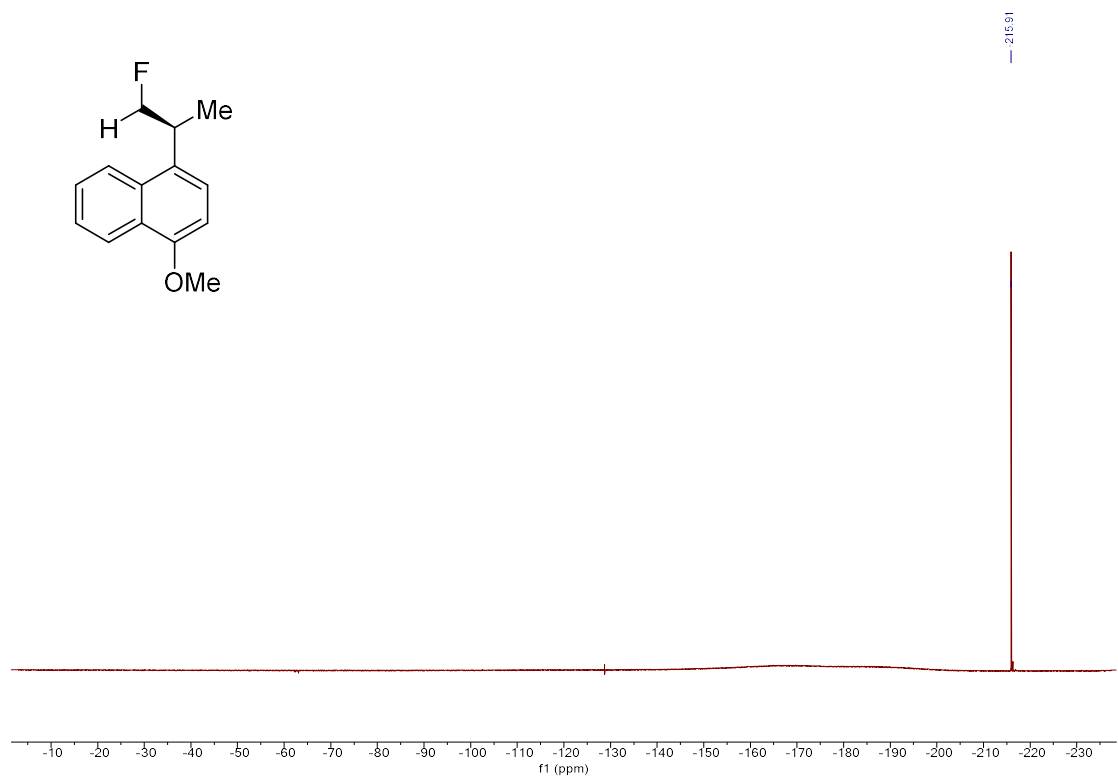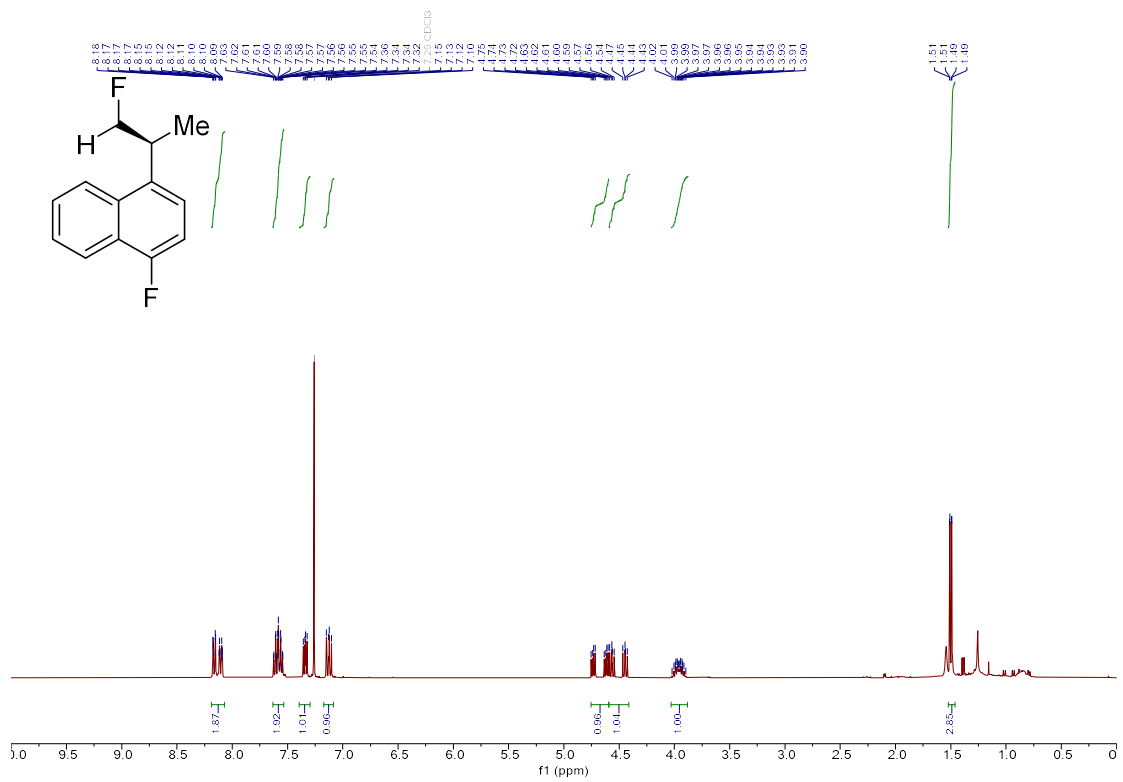

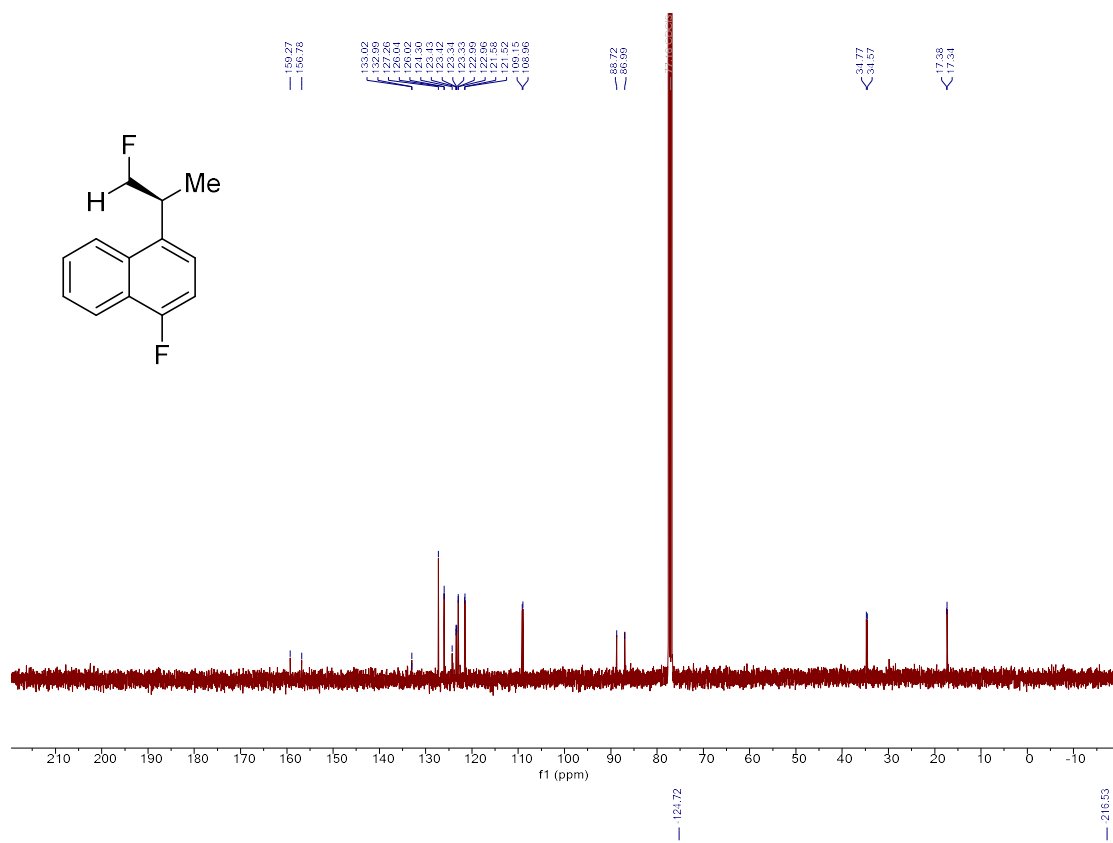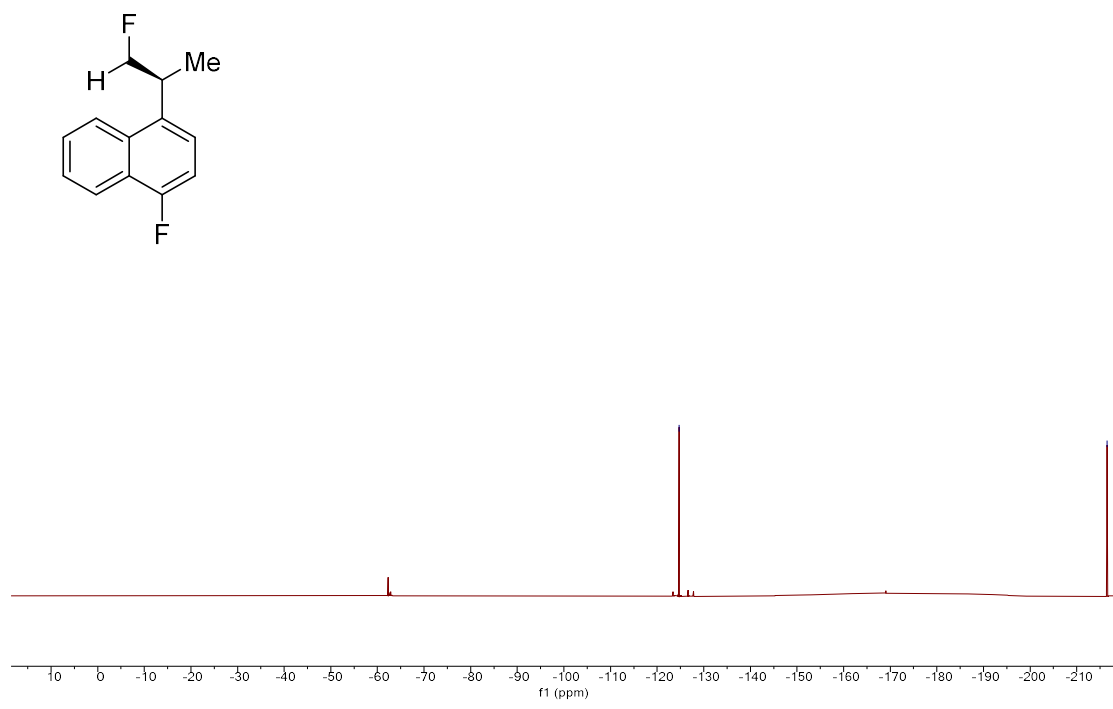

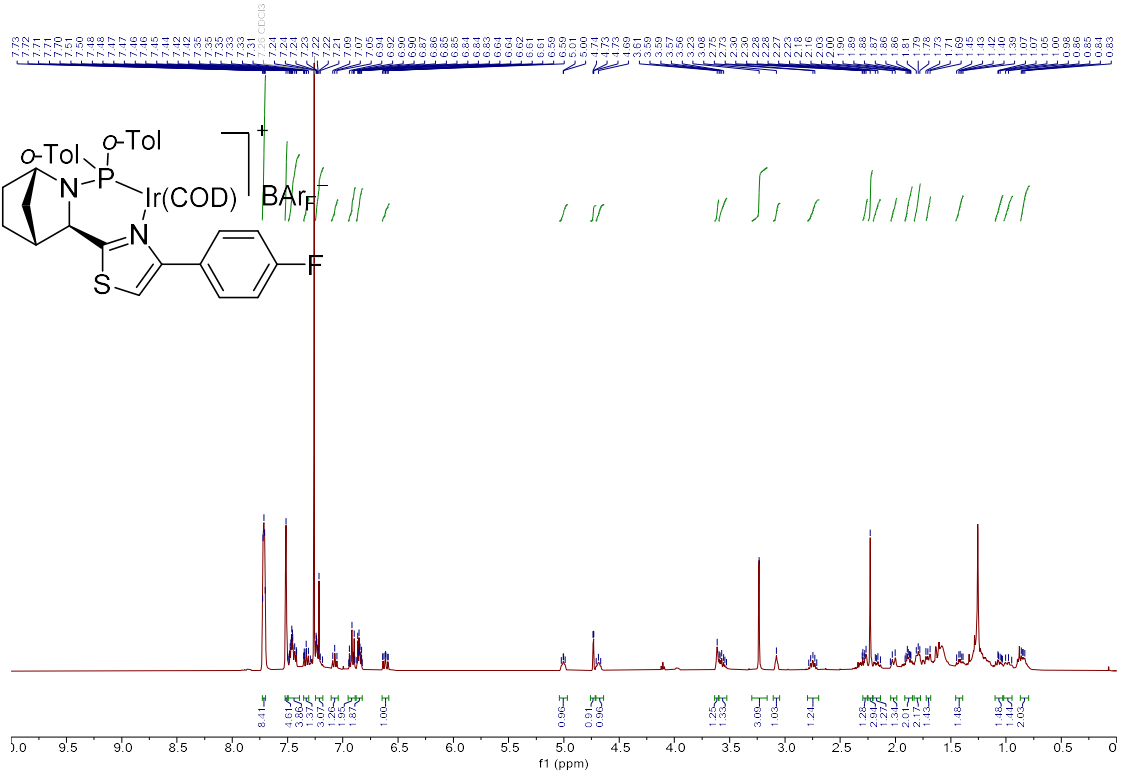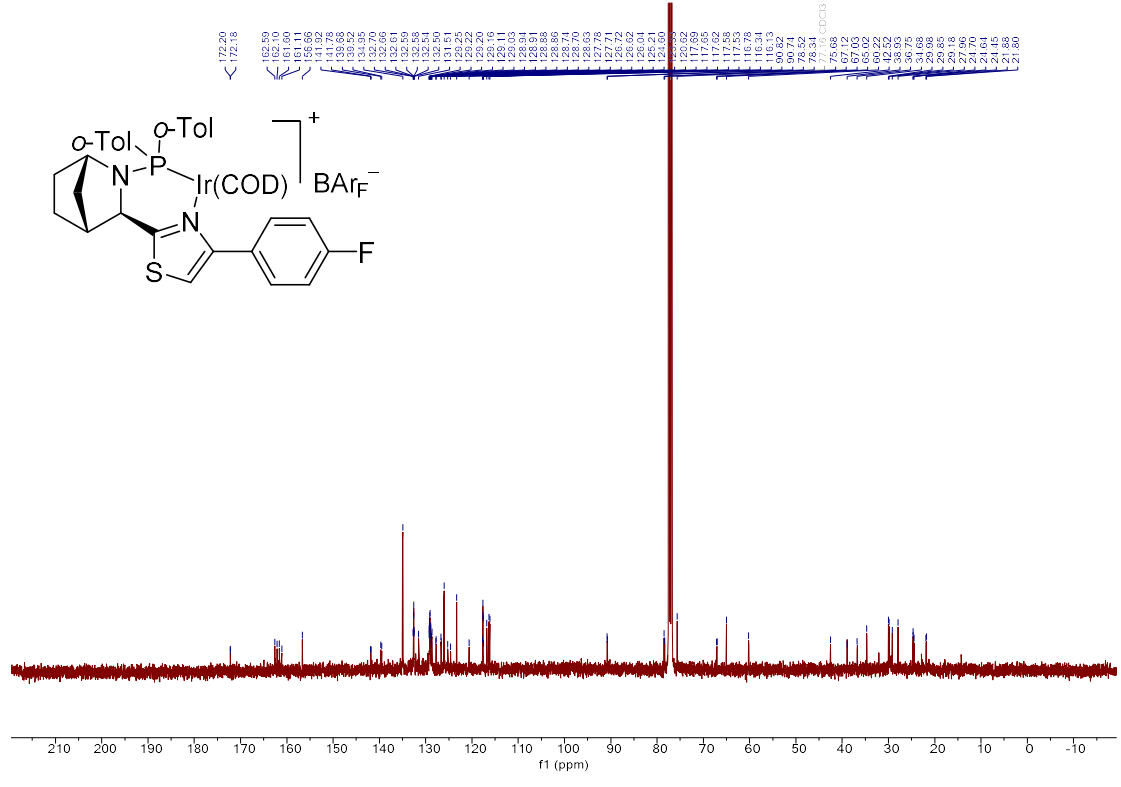

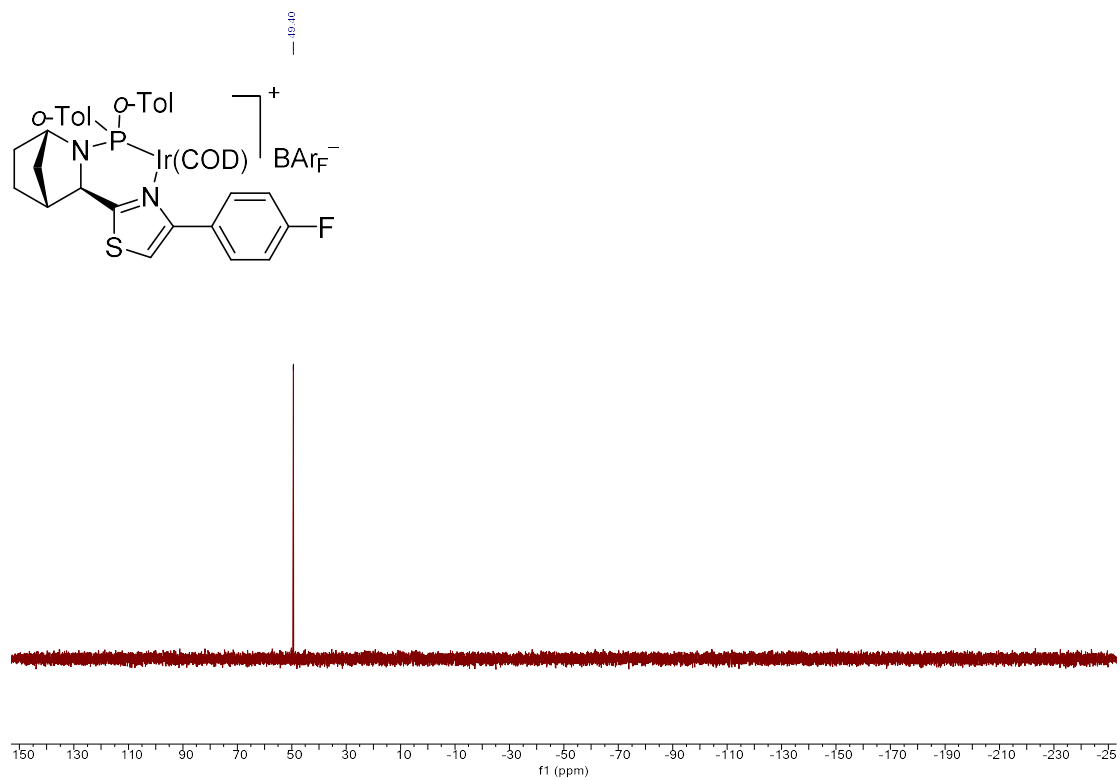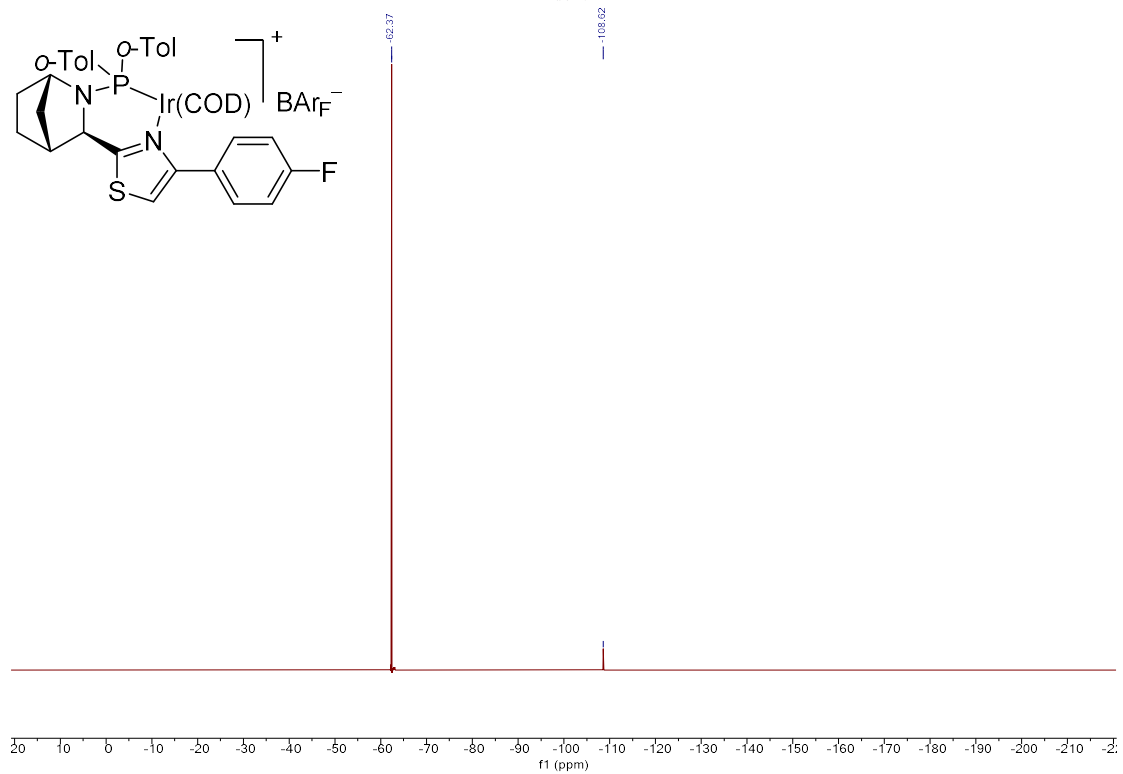





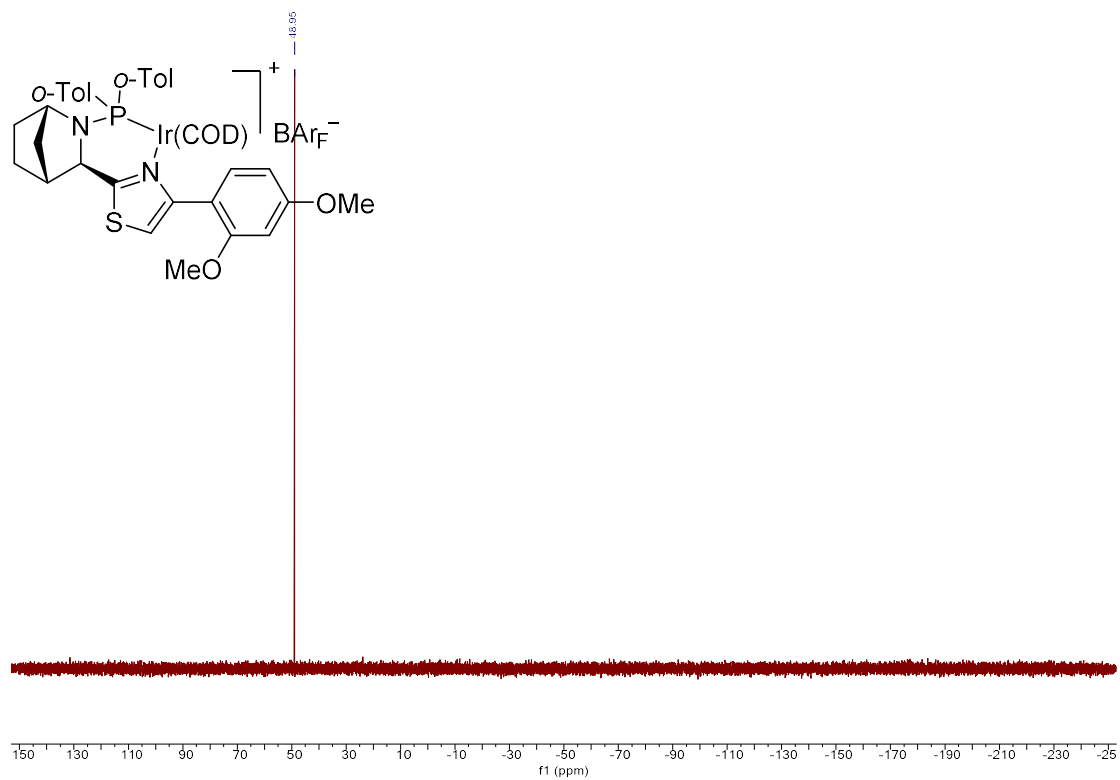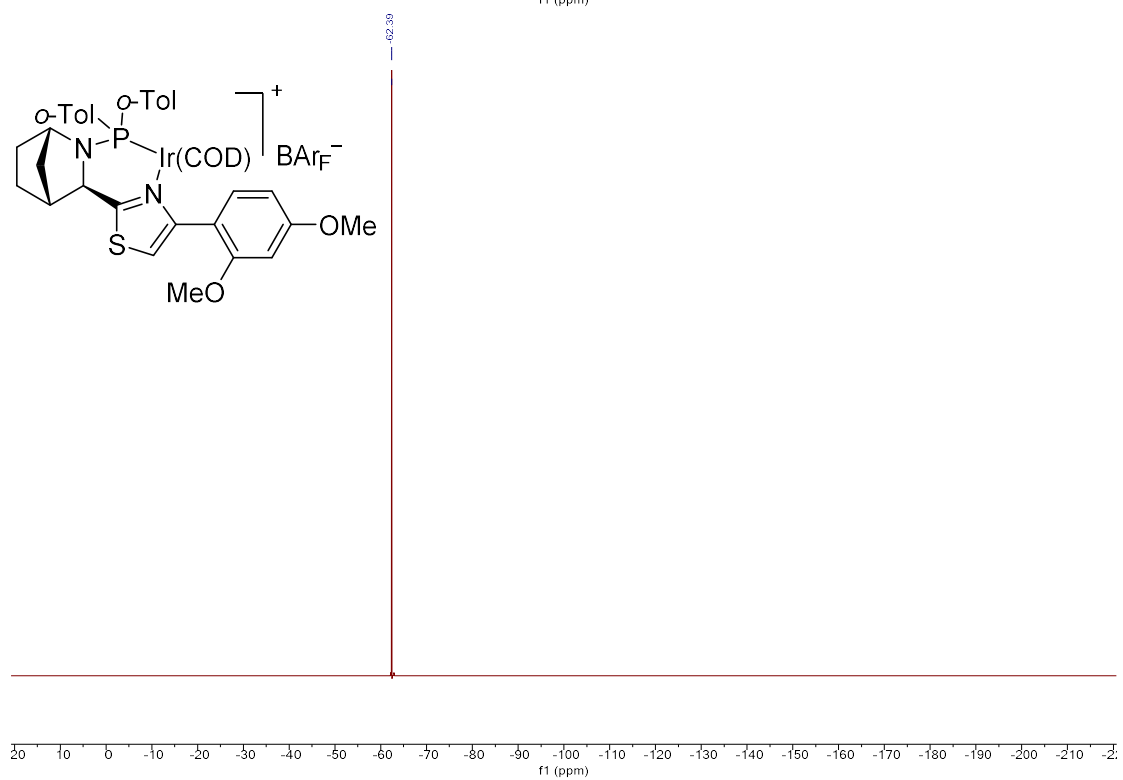

YJ-20201230-7-165-chiral, 10.fid

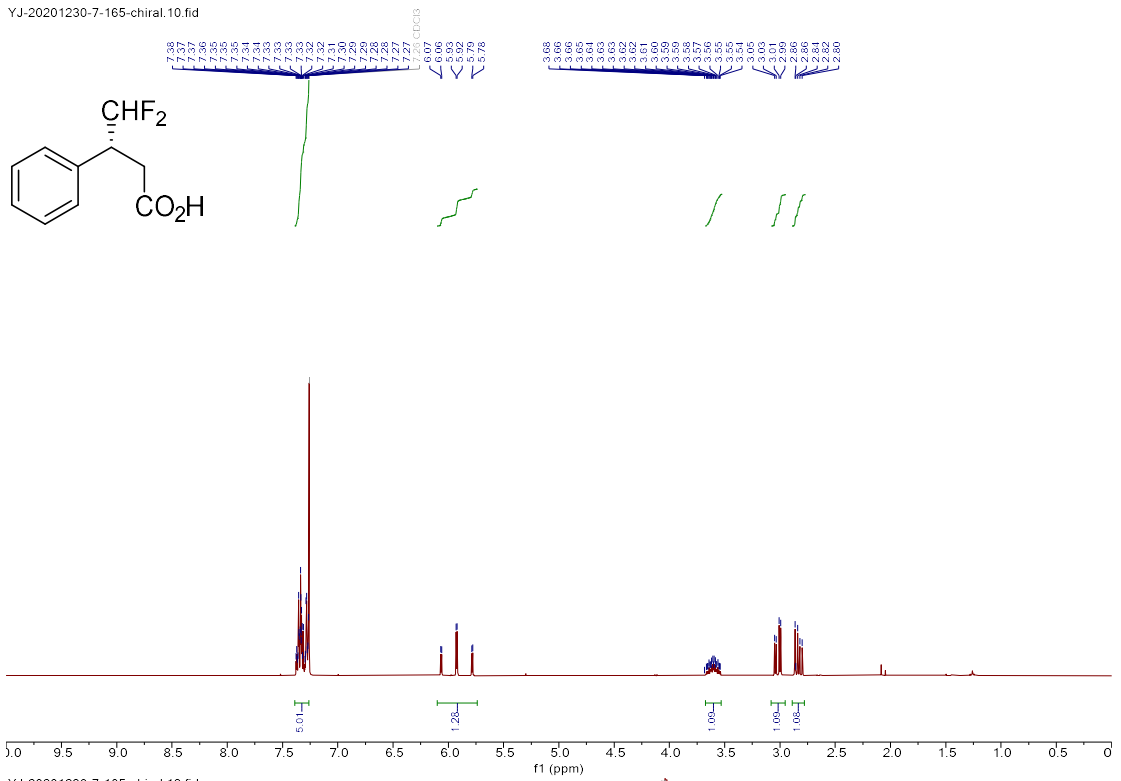

YJ-20201230-7-165-chiral, 13.fid

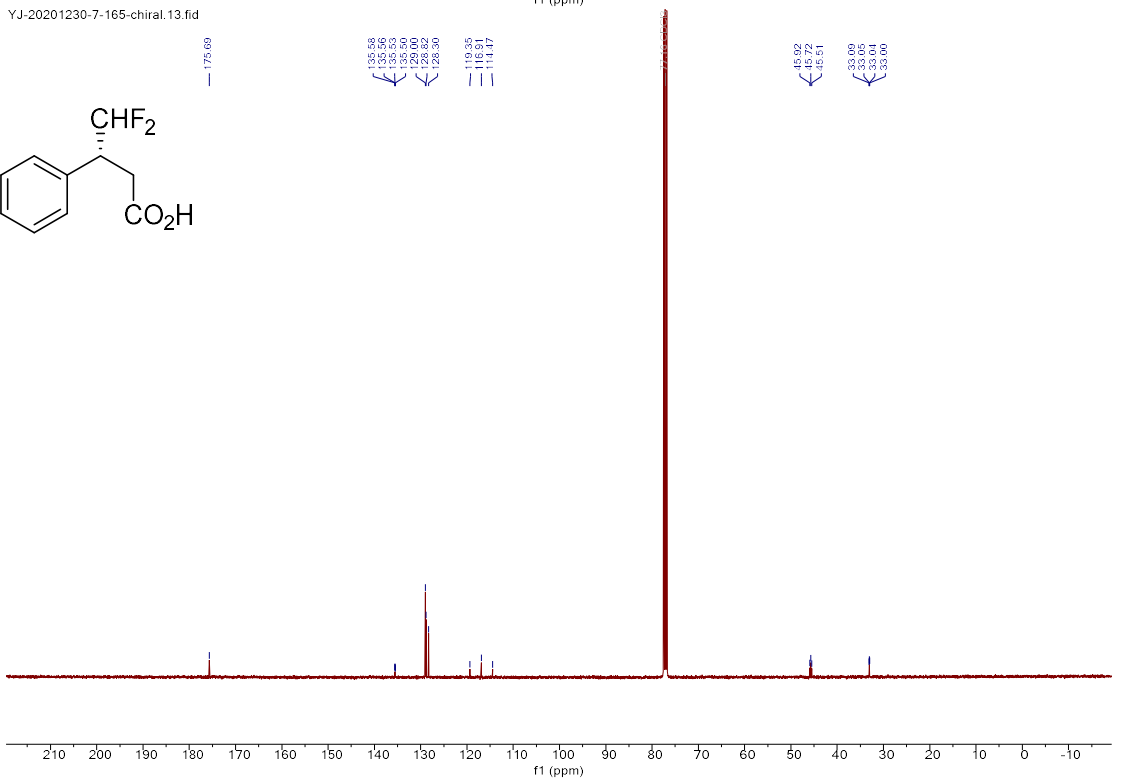

YJ-20201230-7-165-chiral.11.fid

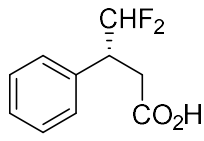

118.85  
118.87  
123.59  
124.32

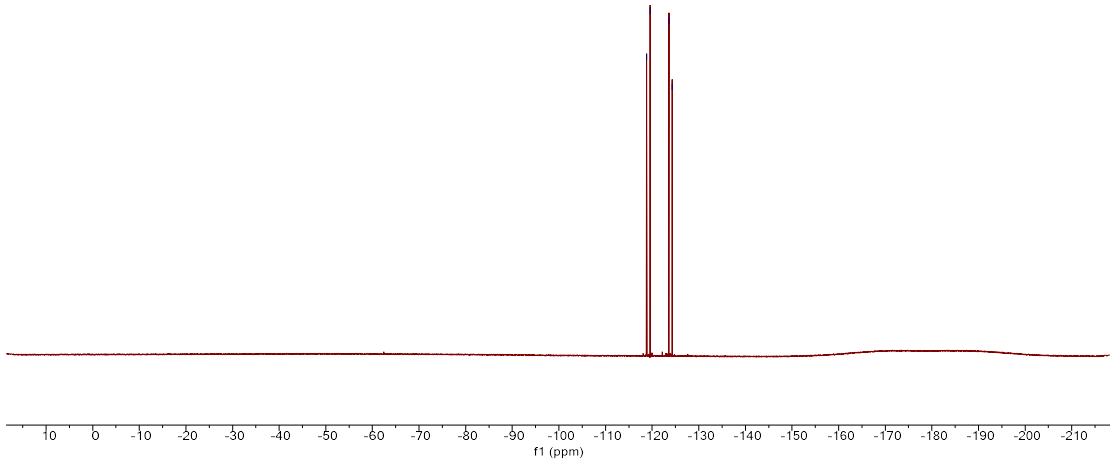

YJ-20210102-7-169-rac.10.fid

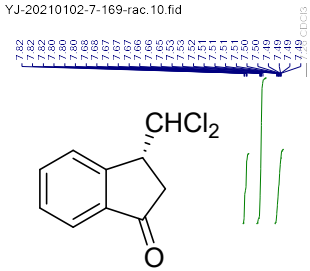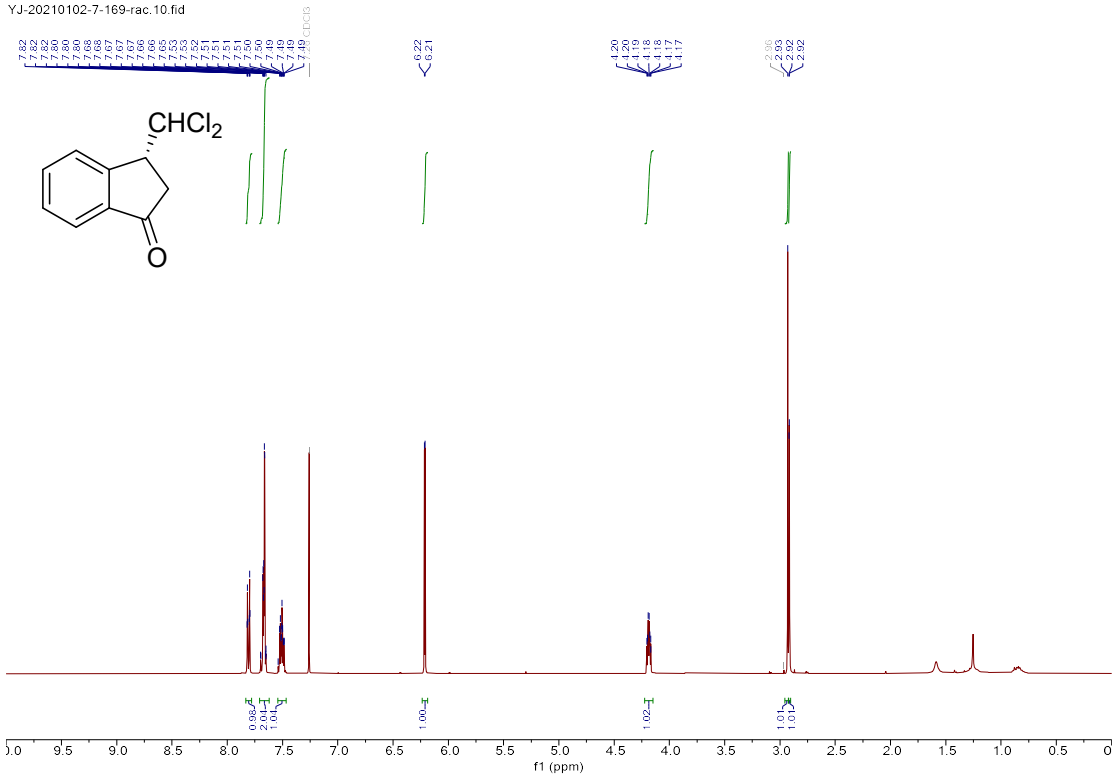

YJ-20210102-7-169-rac.12.fid

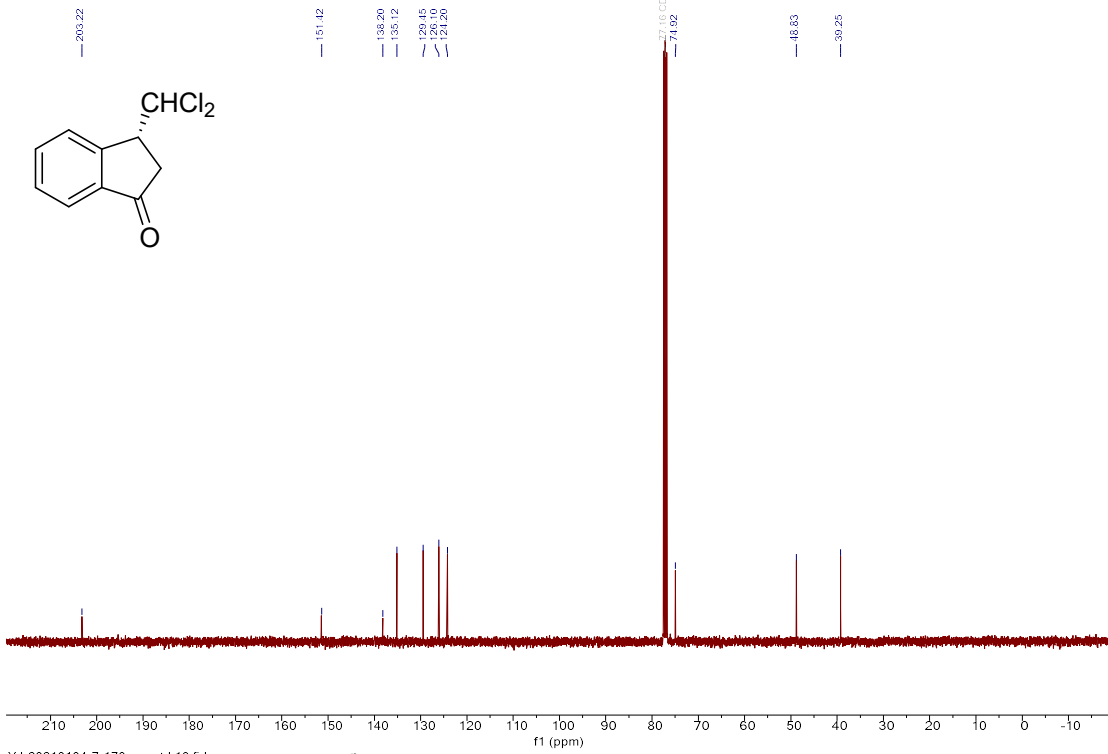

YJ-20210104-7-170-rac-std.10.fid

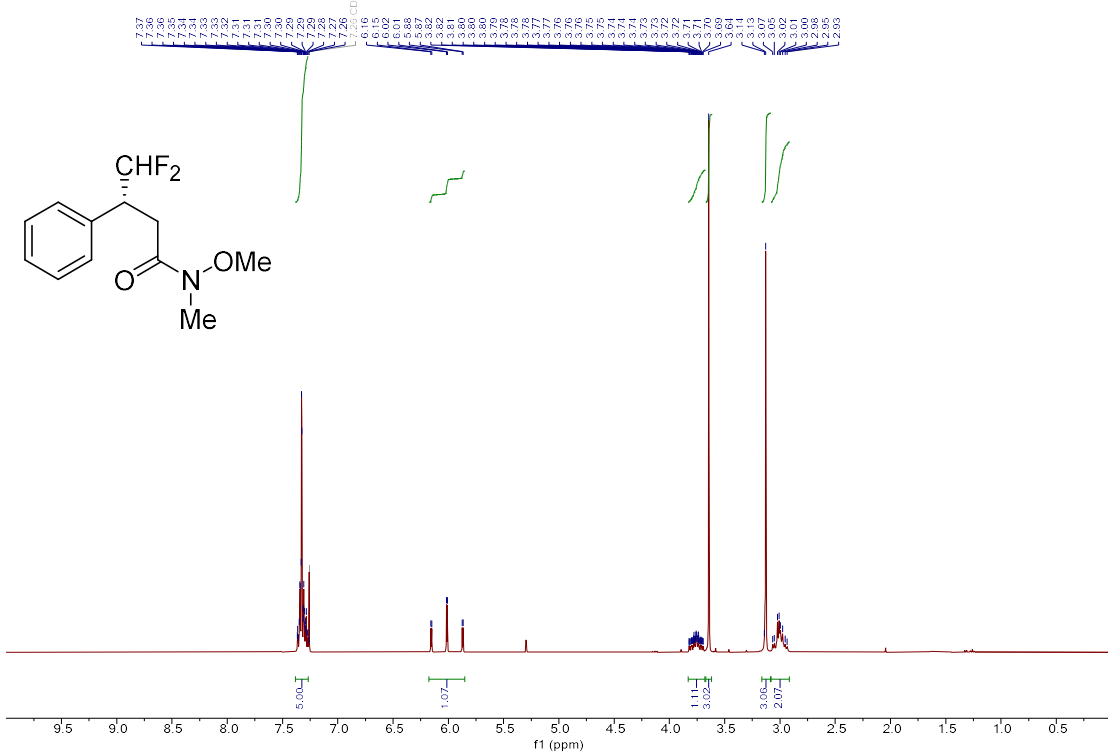

YJ-20210104-7-170-rac-std.13.fid

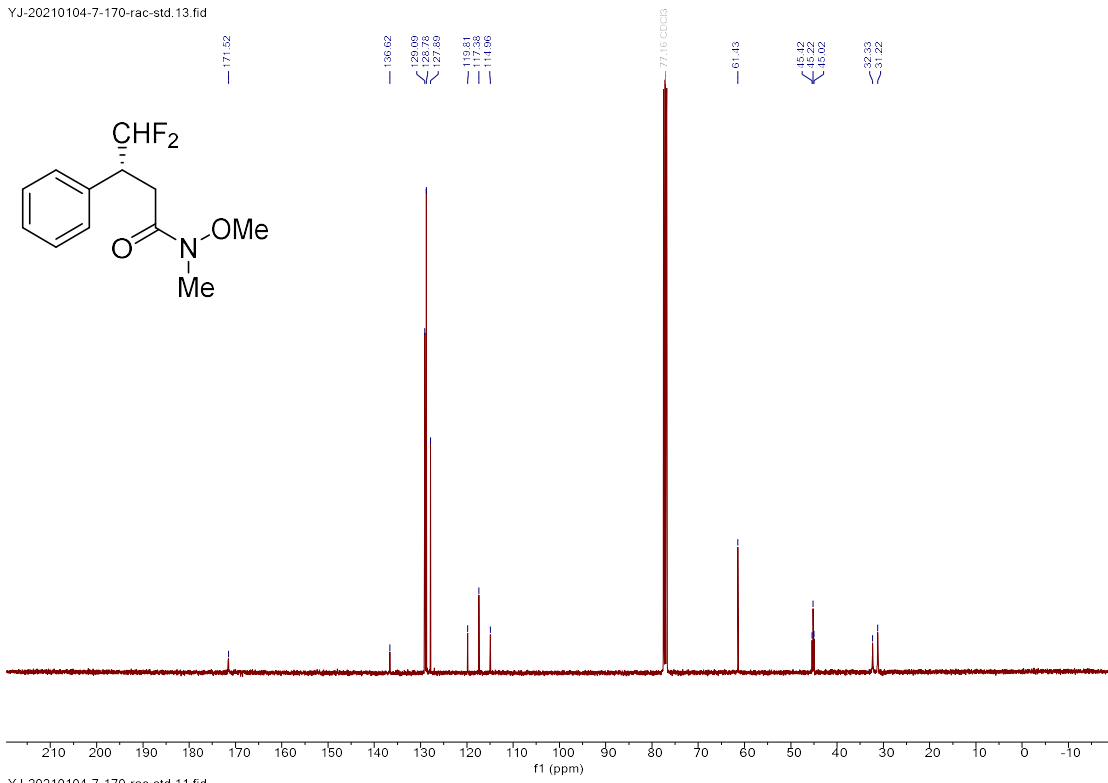

YJ-20210104-7-170-rac-std.11.fid

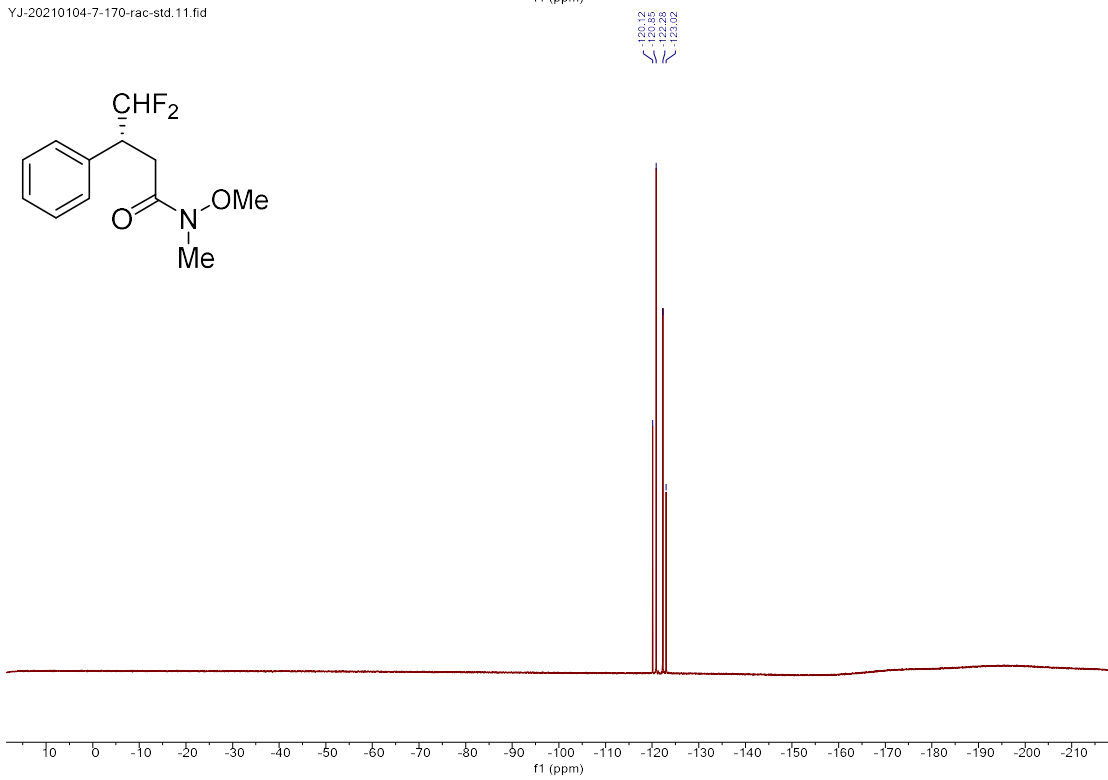







YJ-20210103-7-172-chiral.12.fid

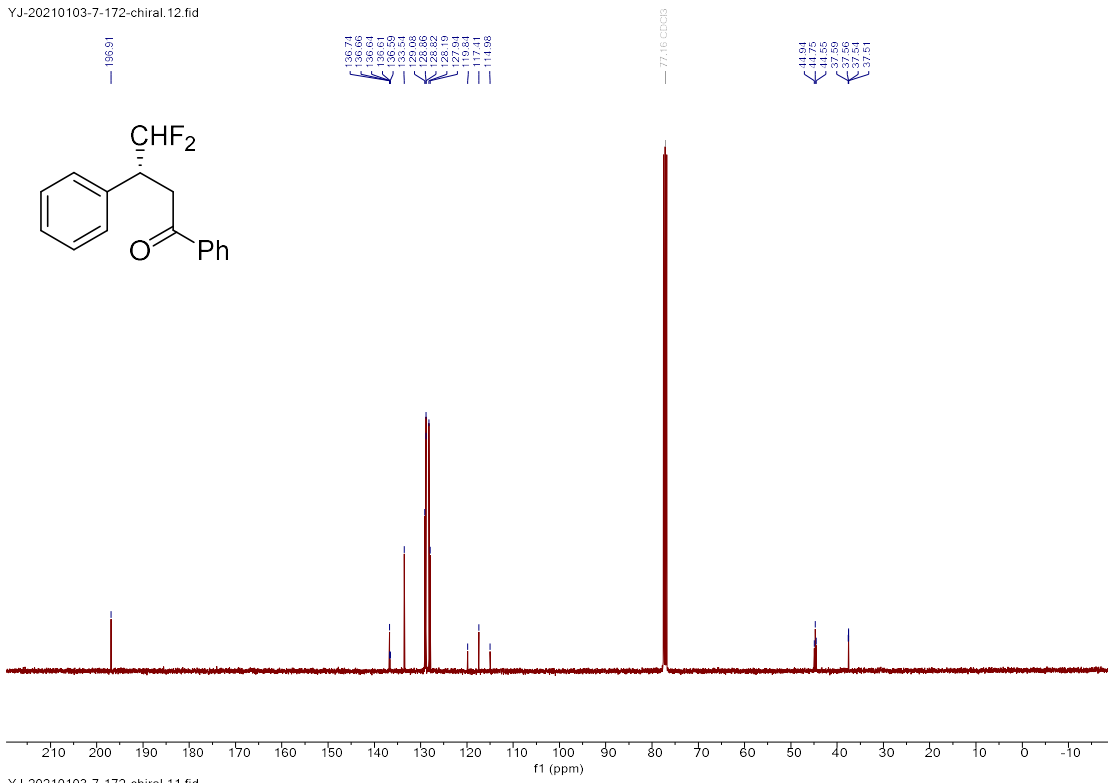

YJ-20210103-7-172-chiral.11.fid

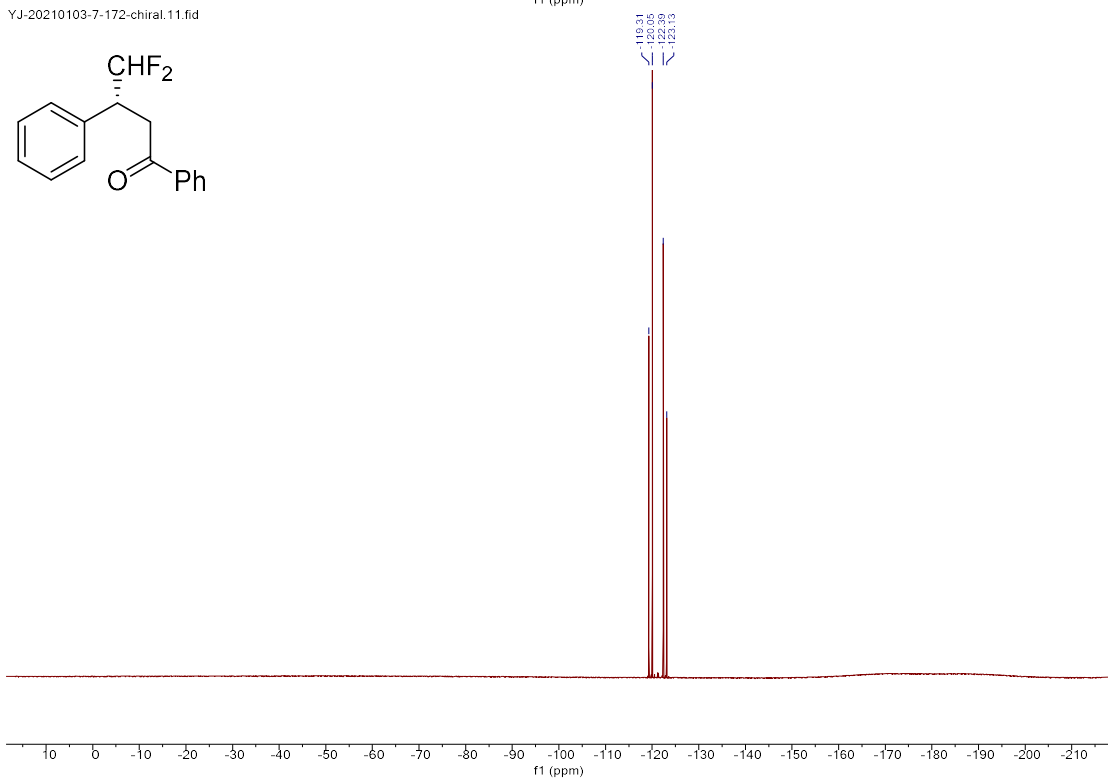

YJ-20201230-7-170-rac.13.fid

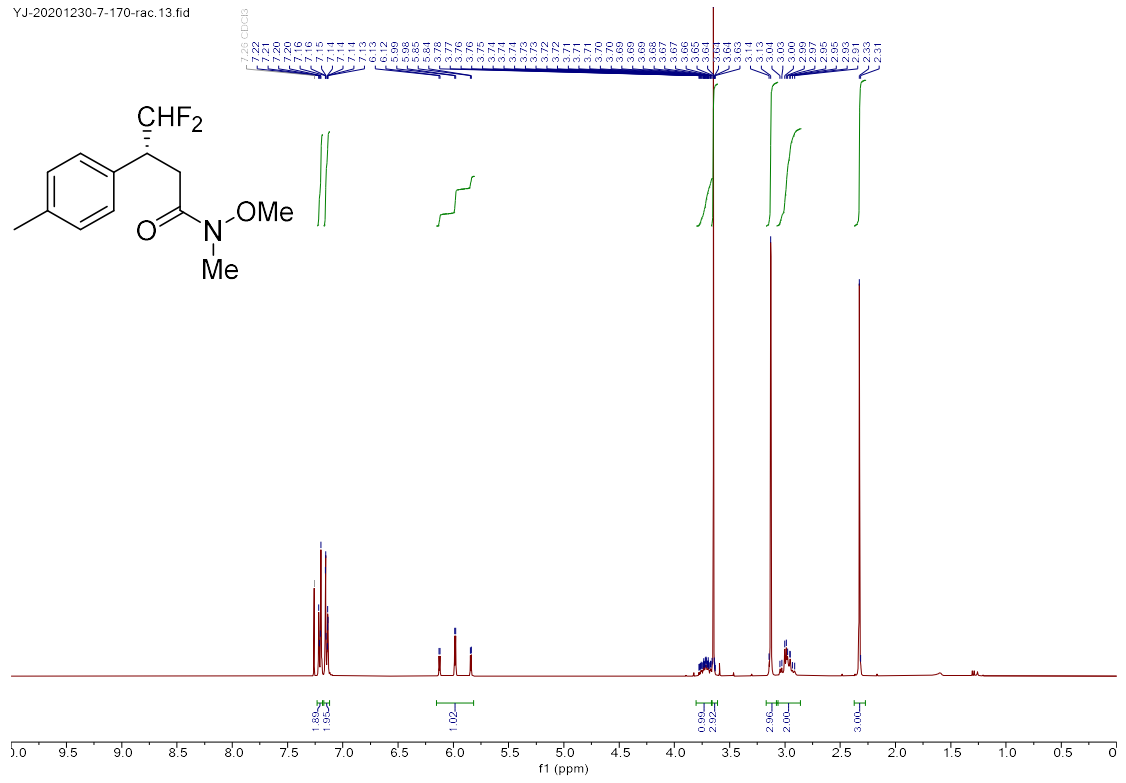

YJ-20201230-7-170-rac.16.fid

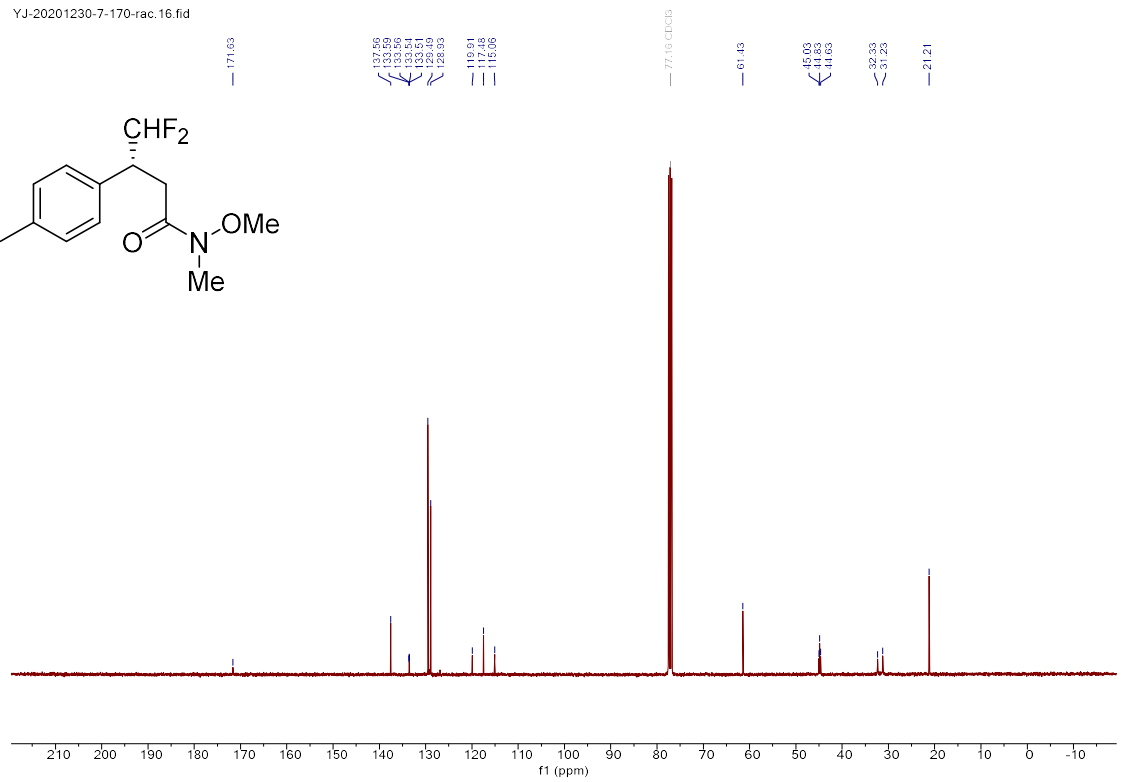

YJ-20201230-7-170-rac.14.fid

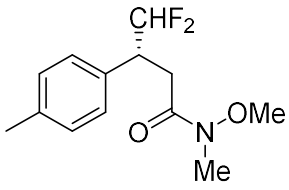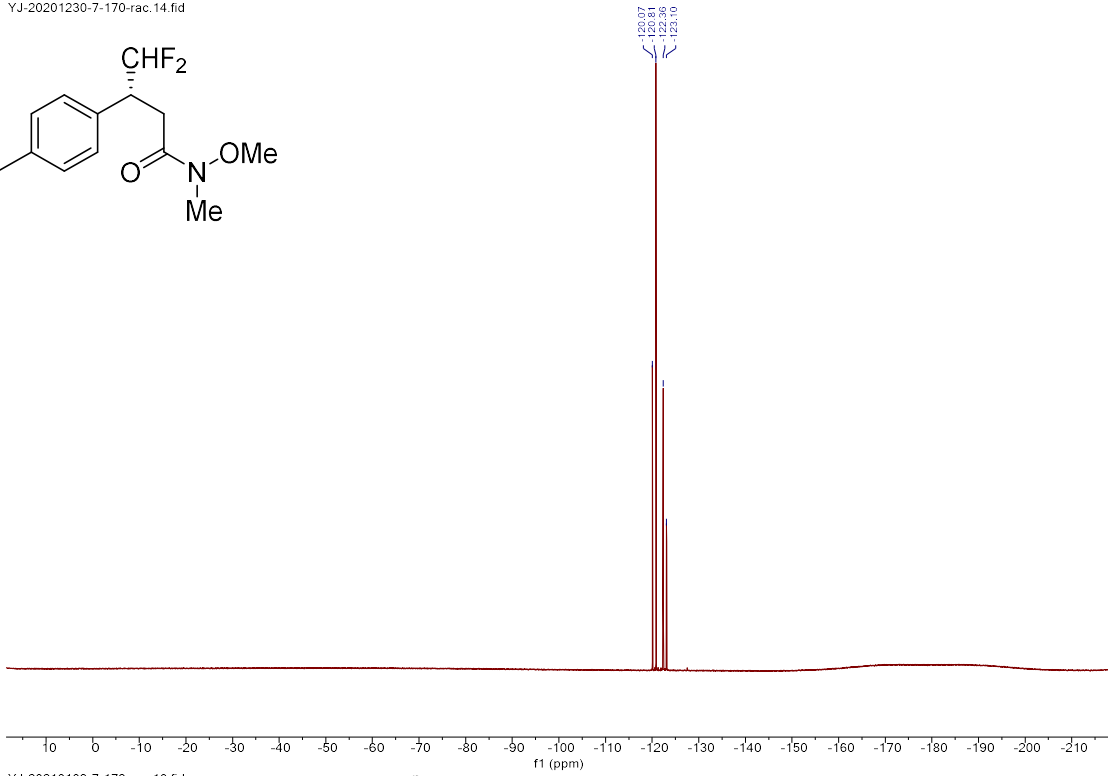

YJ-20210103-7-173-rac.10.fid

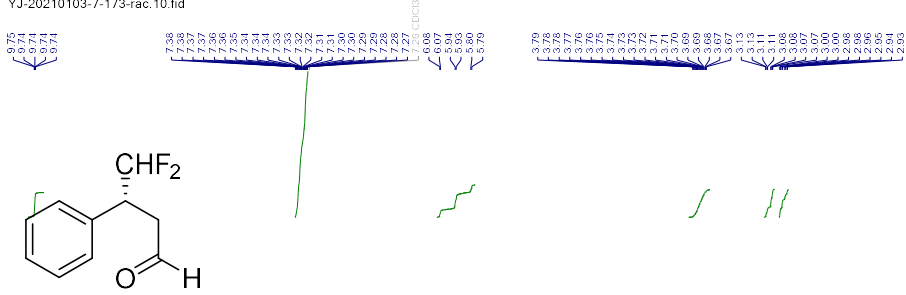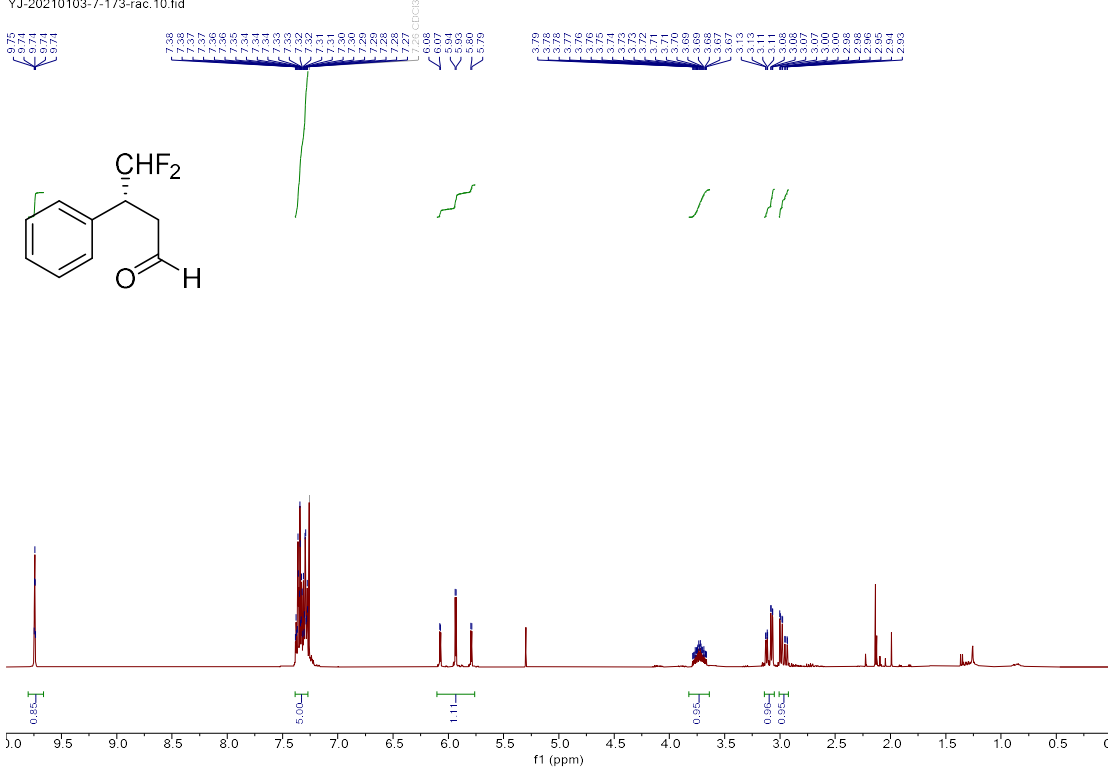

YJ-20210103-7-173-rac.12.fid

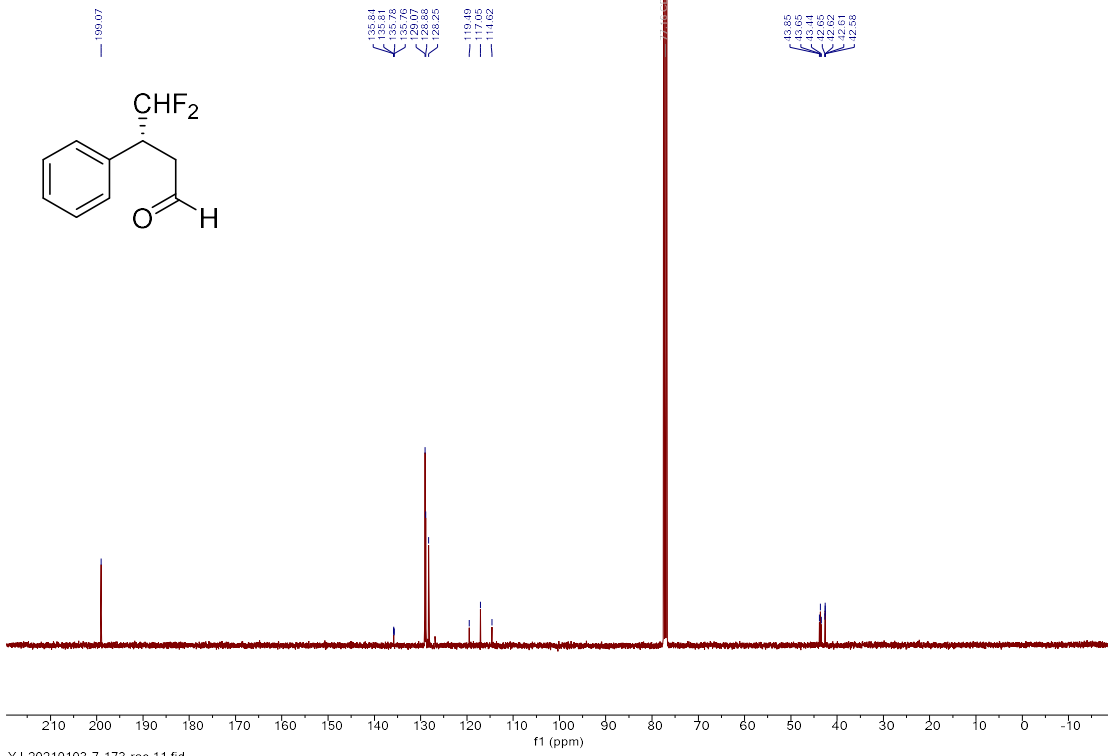

YJ-20210103-7-173-rac.11.fid

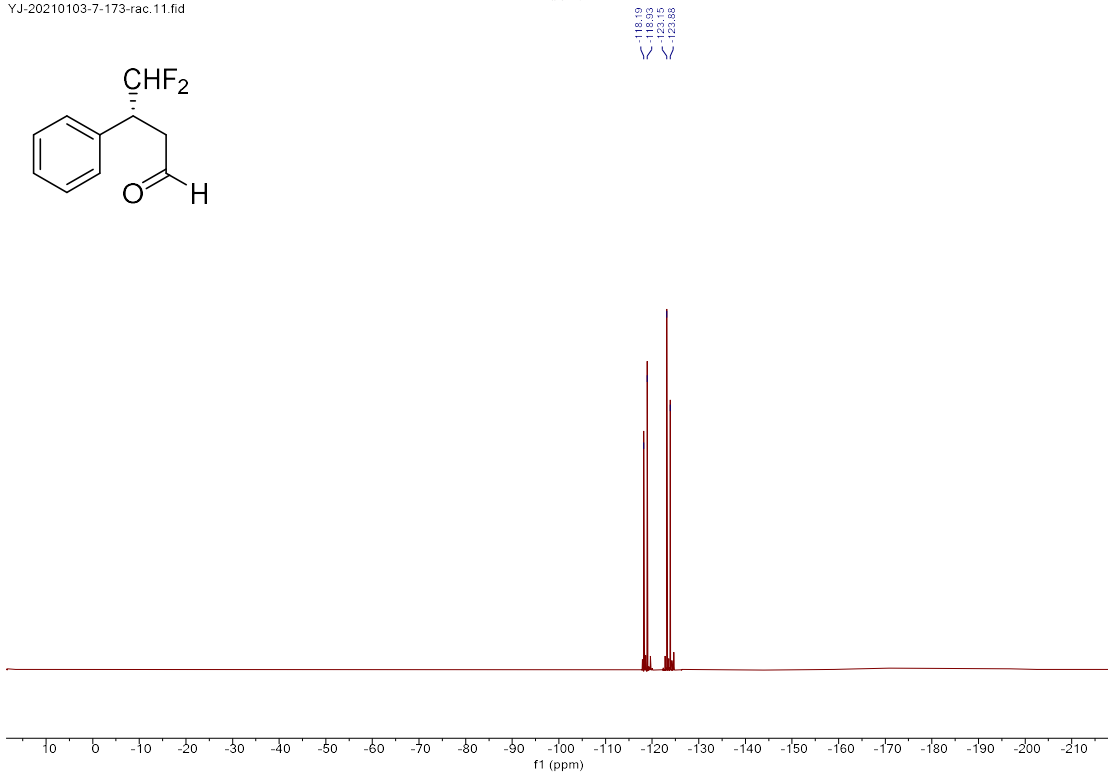



YJ-20210104-7-175-rac.11.fid

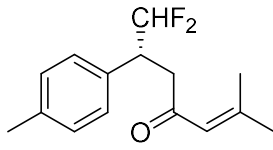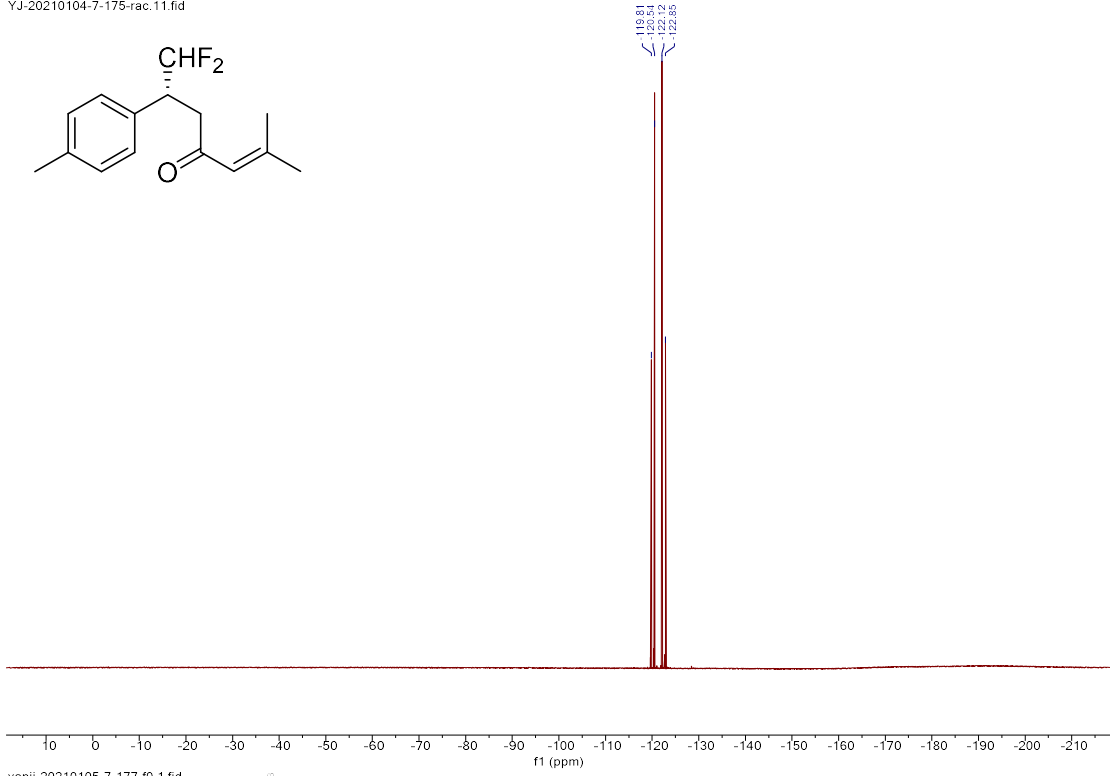

yanji-20210105-7-177-f0.1.fid

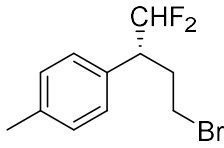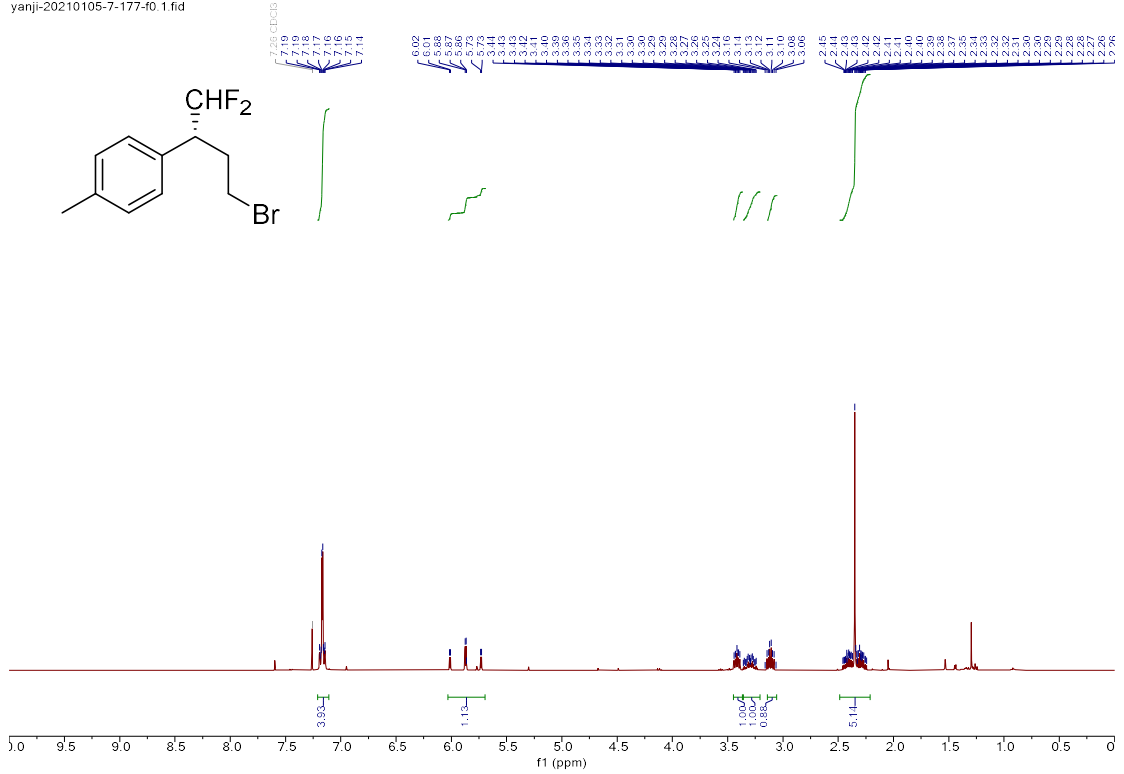

yanji-20210105-7-177-f0.3.fid

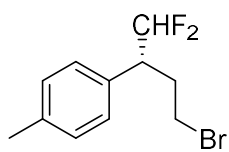

137.56  
136.56  
132.21  
132.16  
128.85  
128.80  
127.92  
115.26  
99.99  
77.16 CDCl3  
18.06  
17.06  
31.33  
31.29  
31.24  
30.63  
21.23

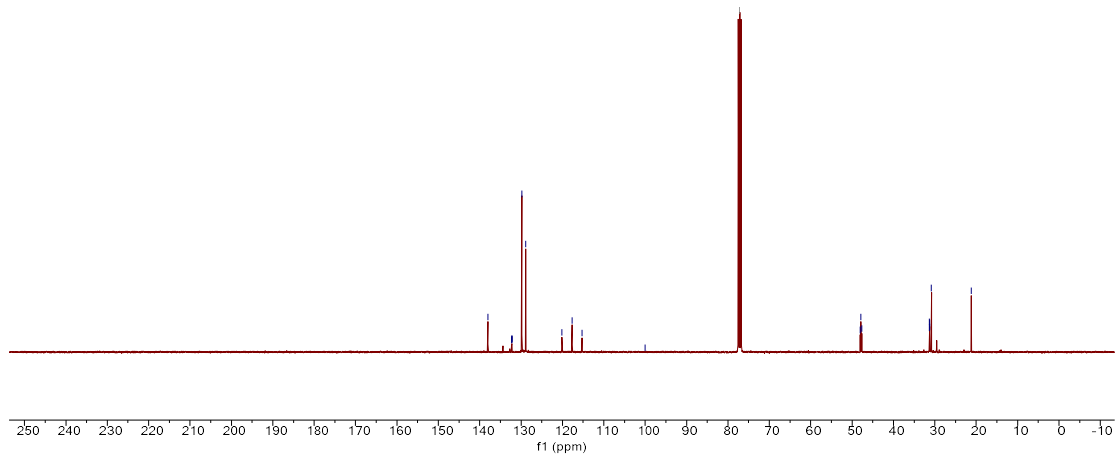

yanji-20210105-7-177-f0.2.fid

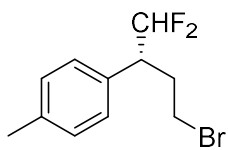

117.51  
118.25  
123.29

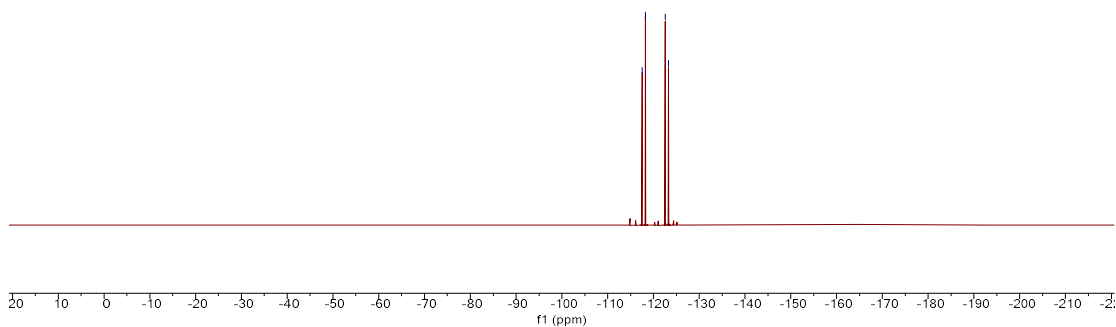





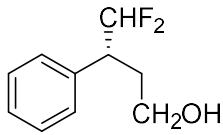

118.08  
118.62  
122.88

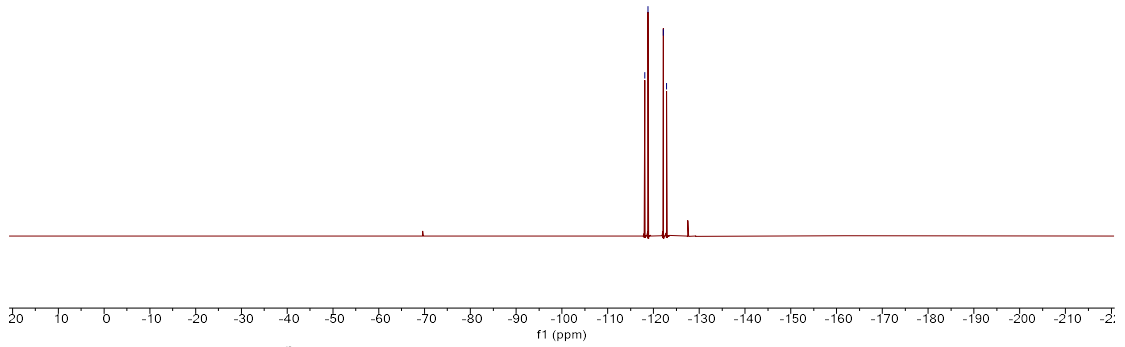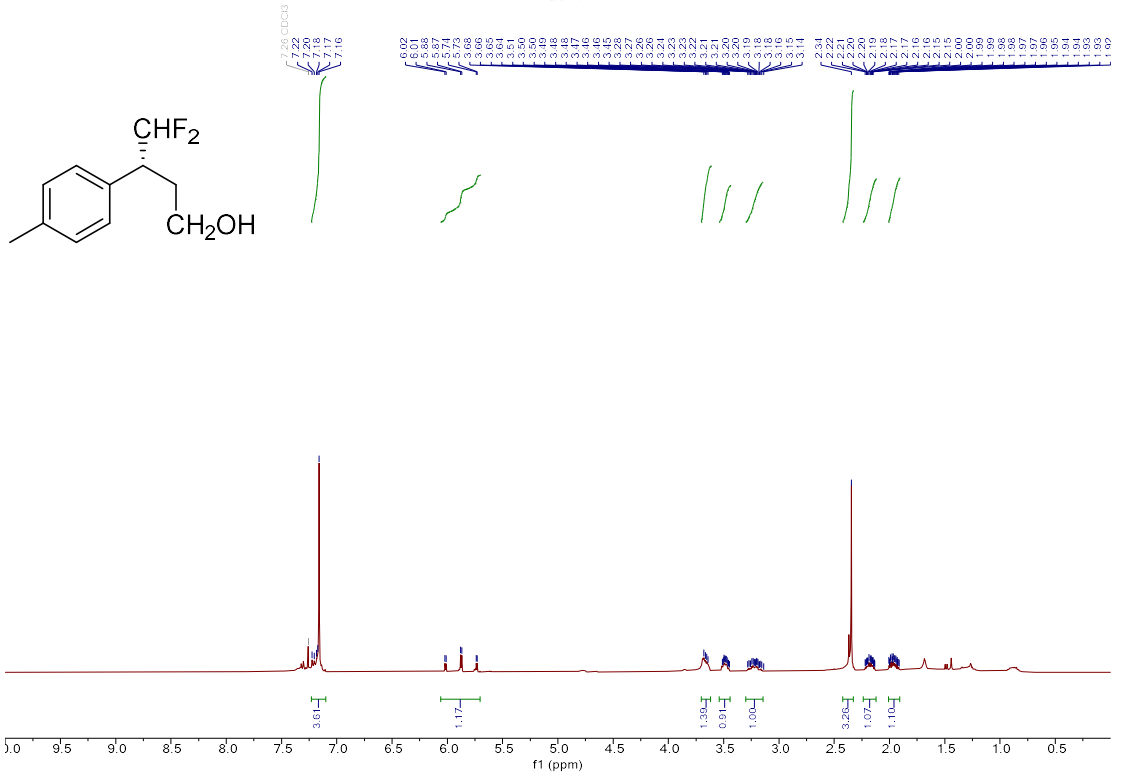

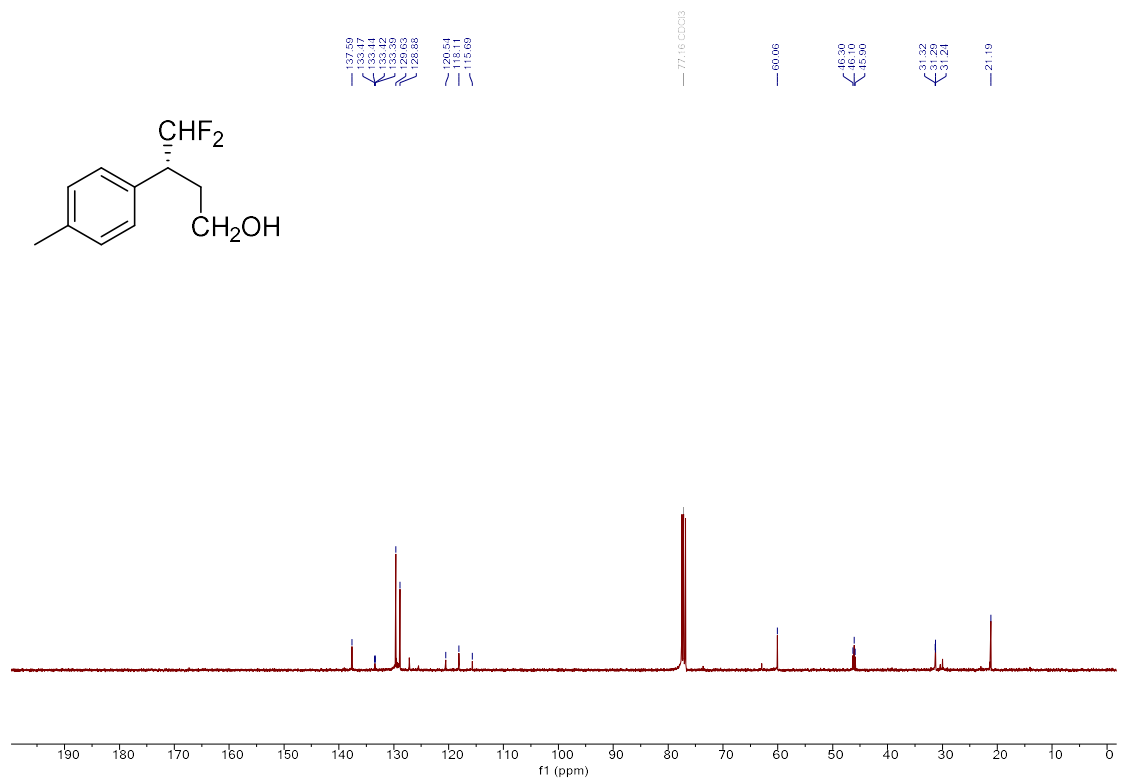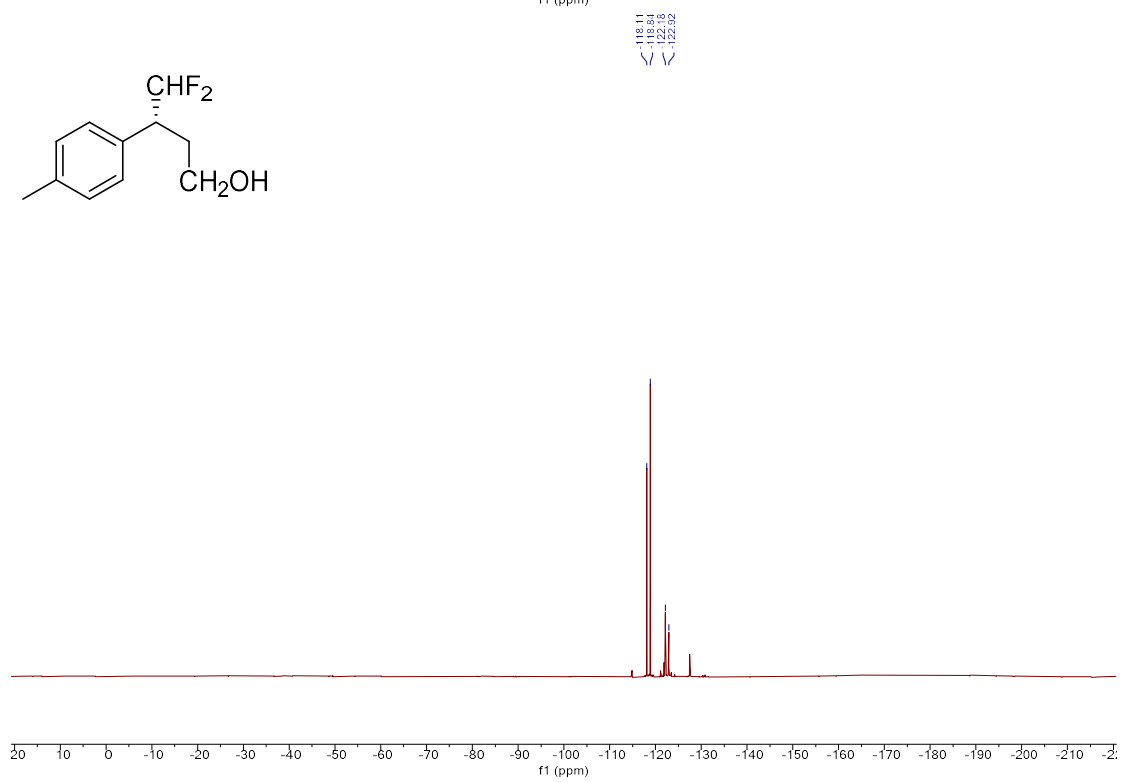

## 10. Chromatograms

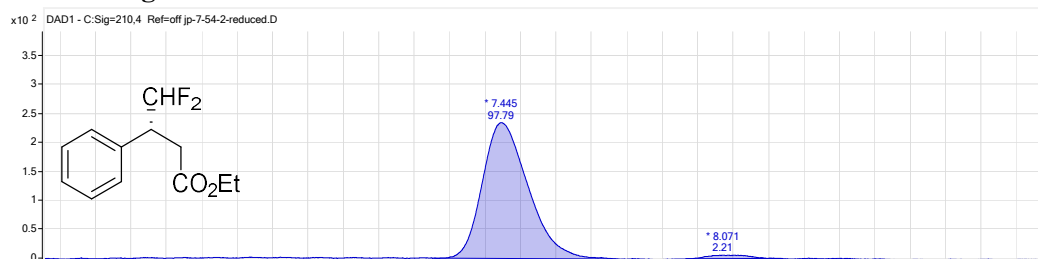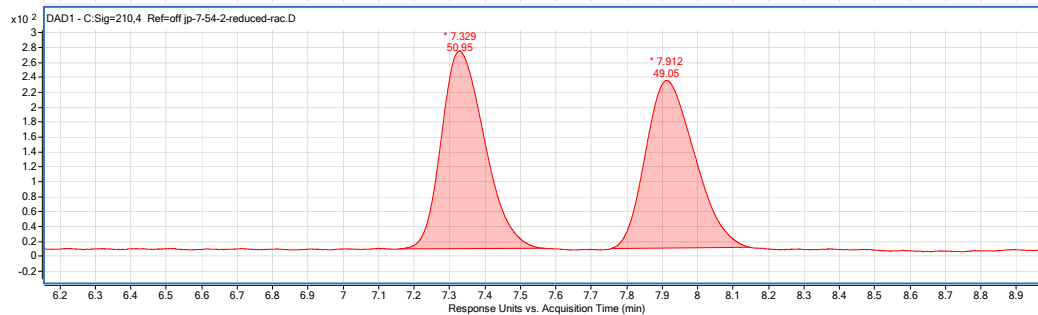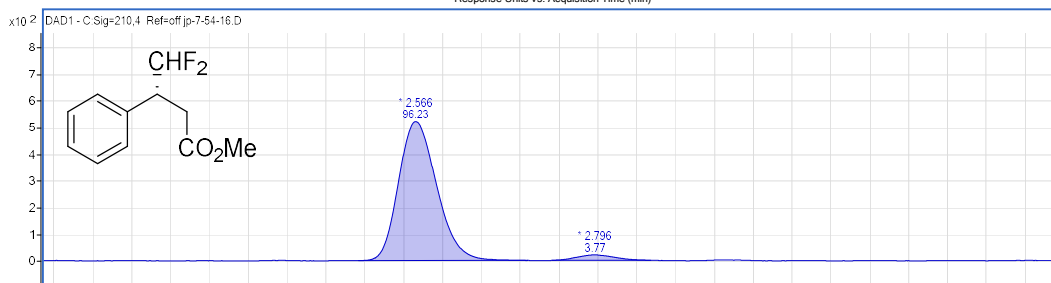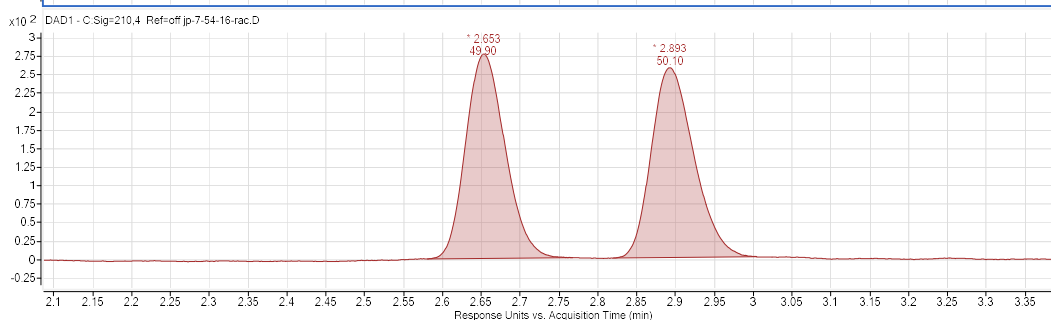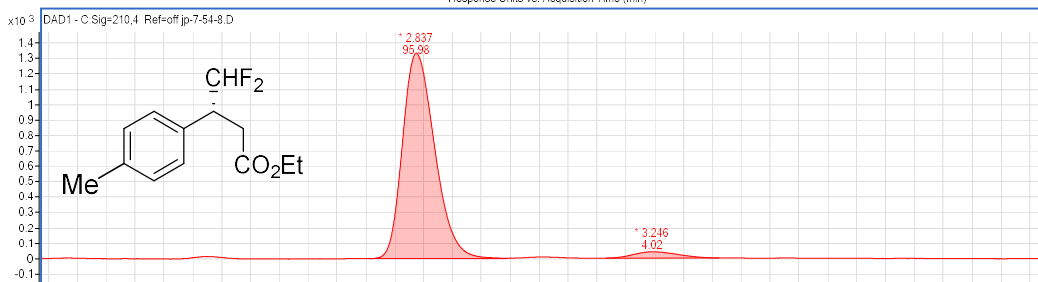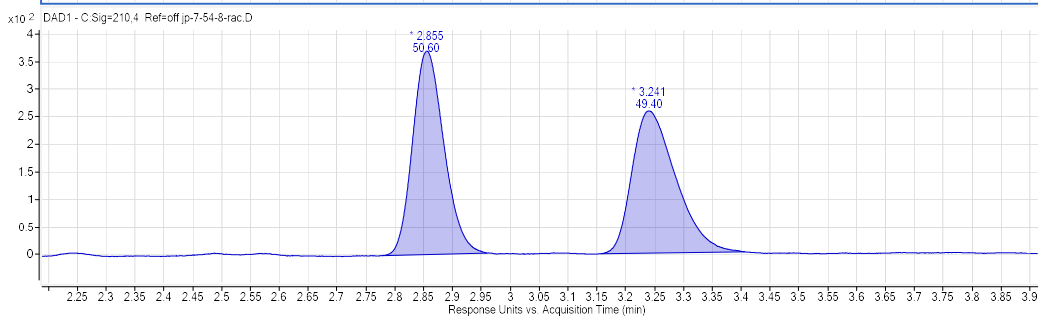

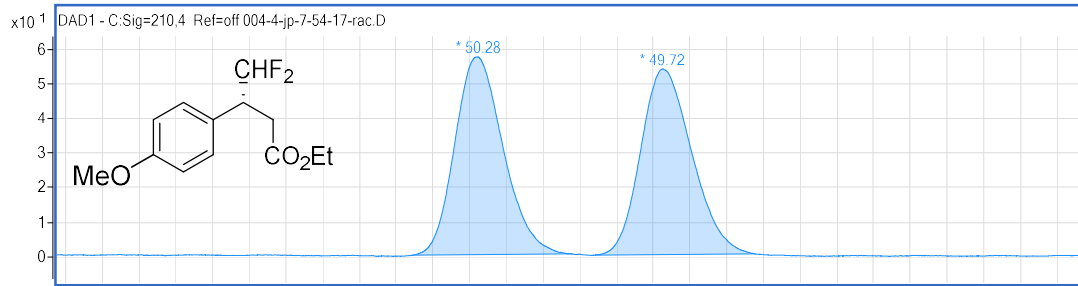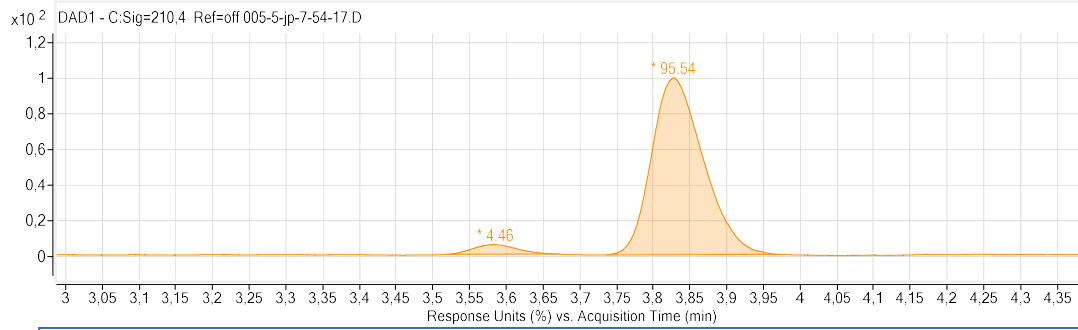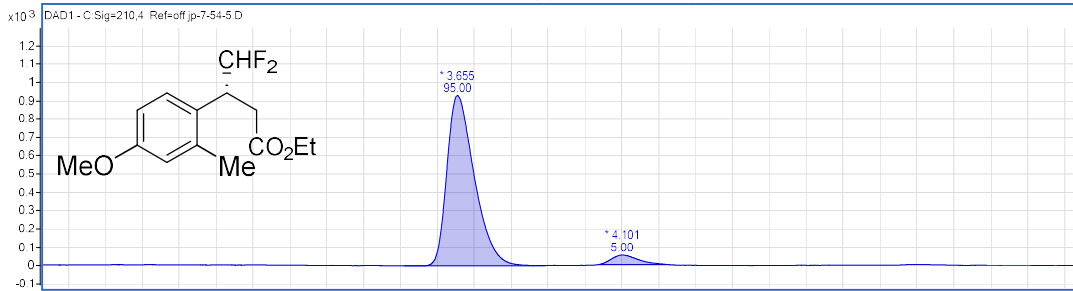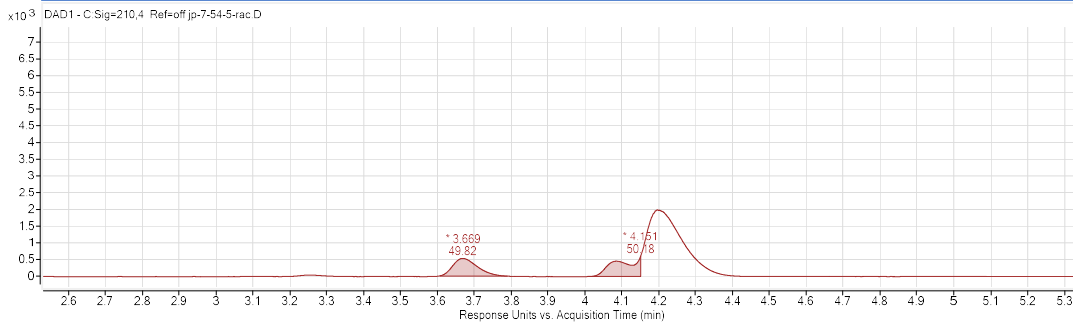

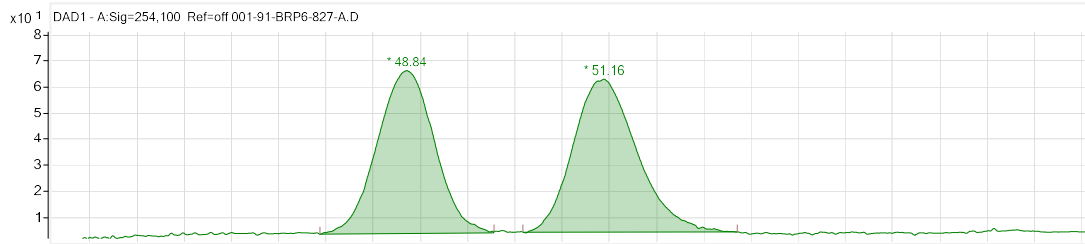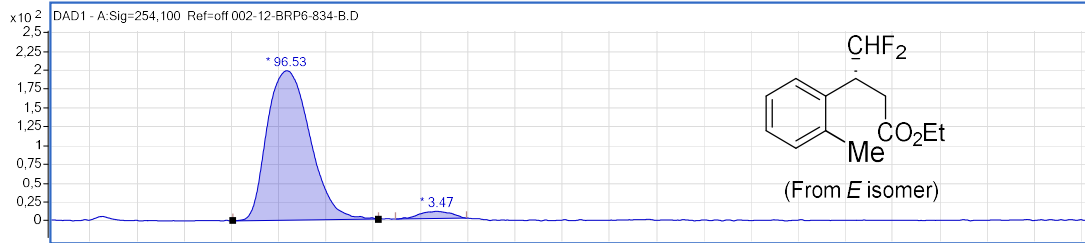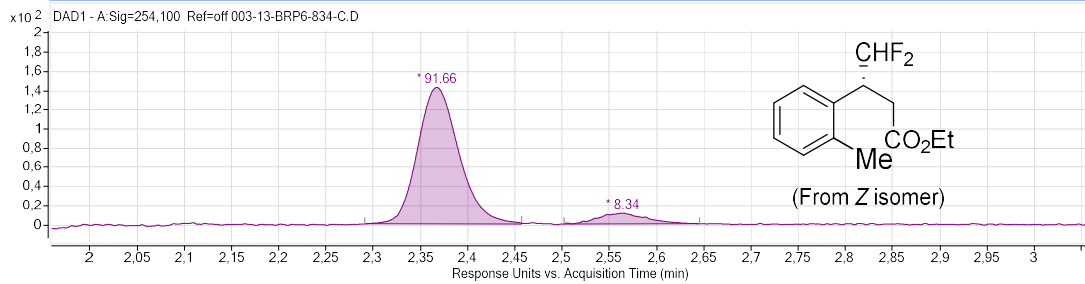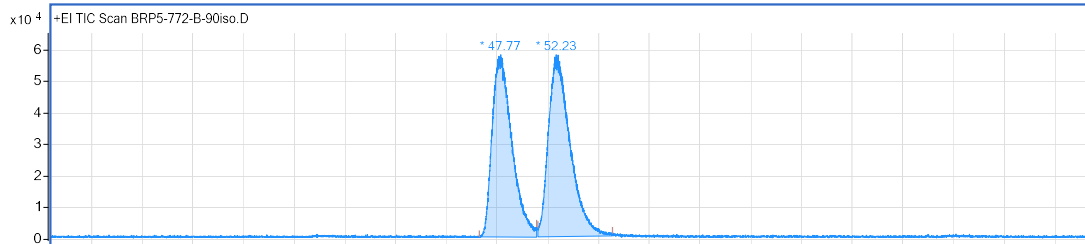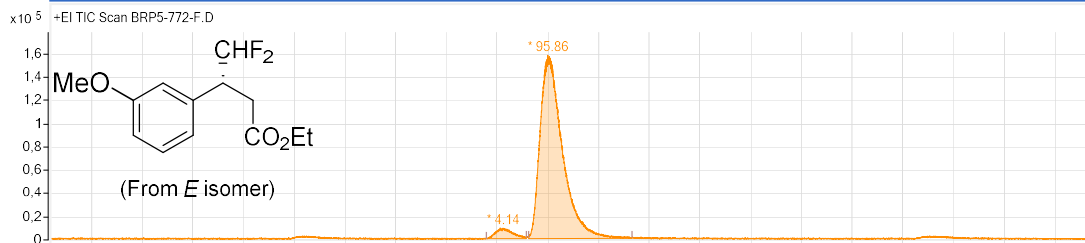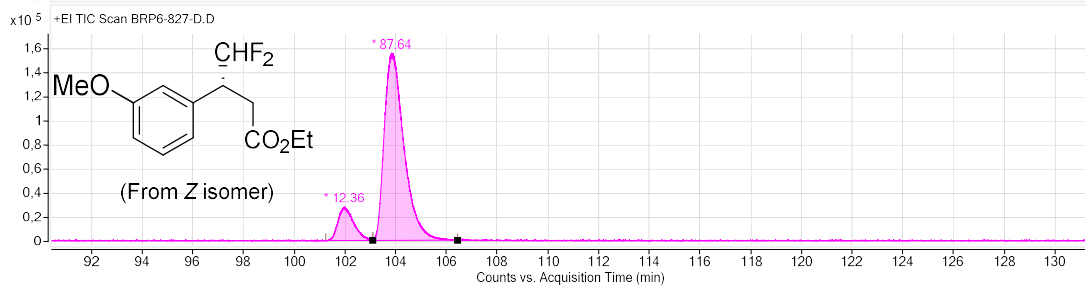

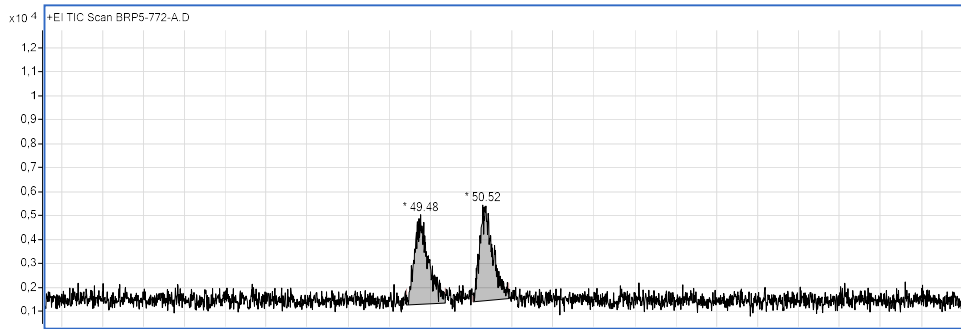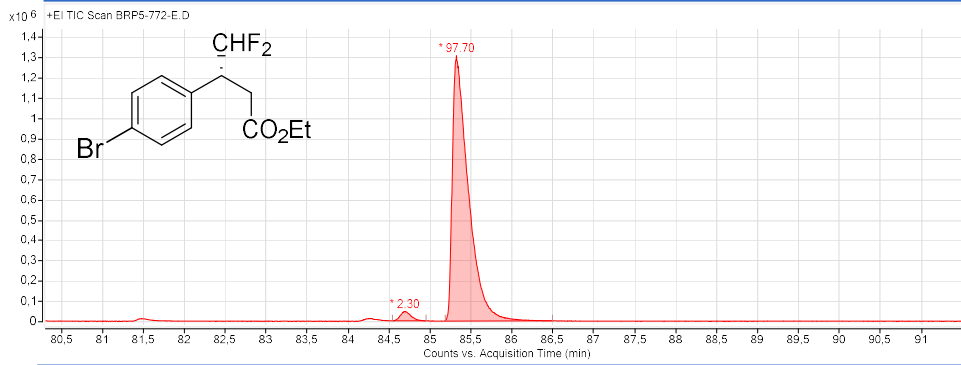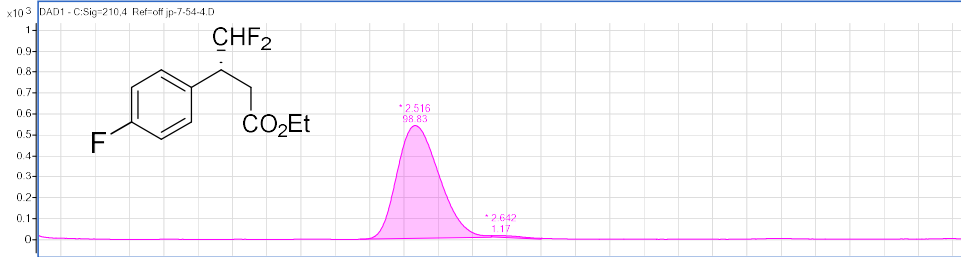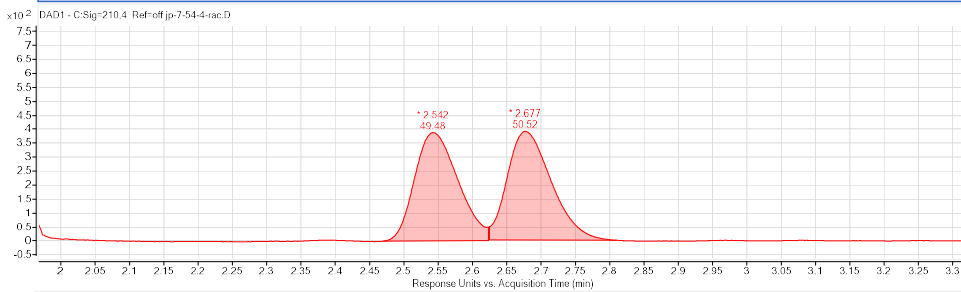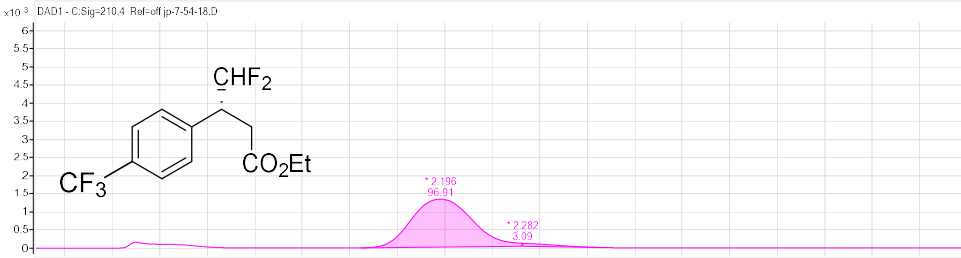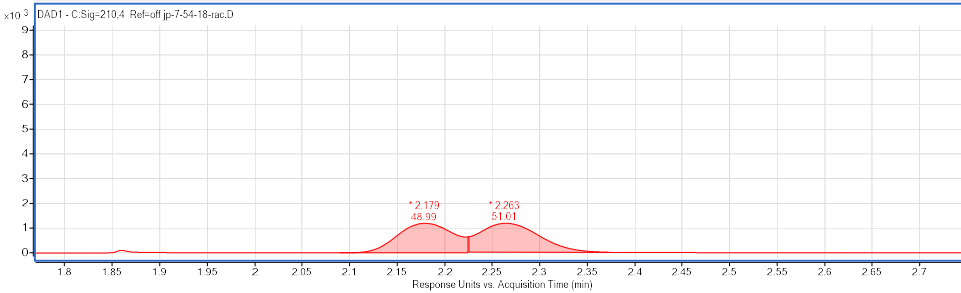

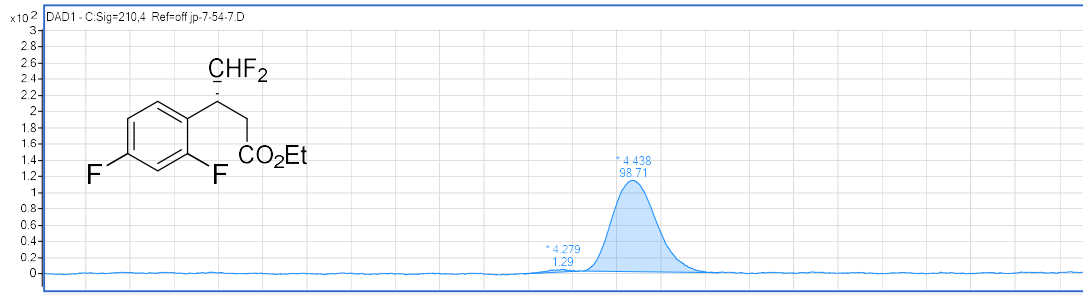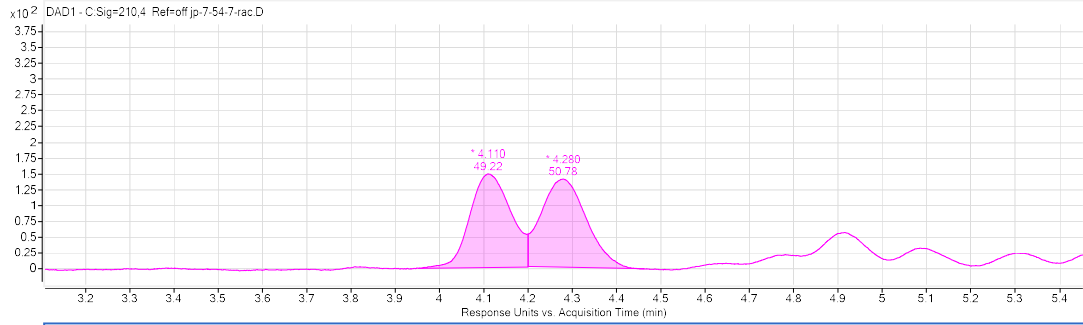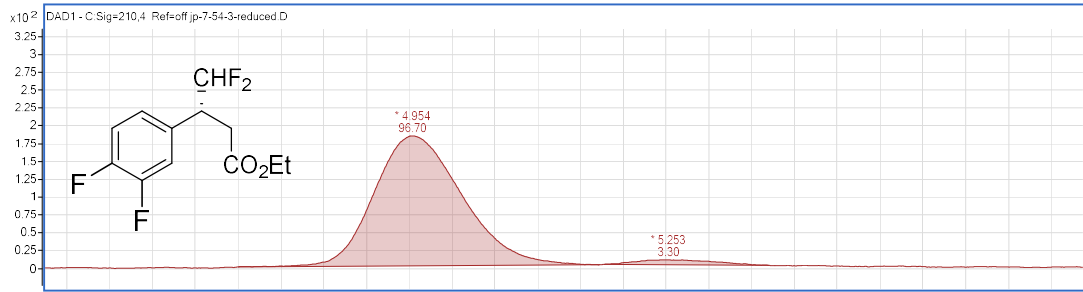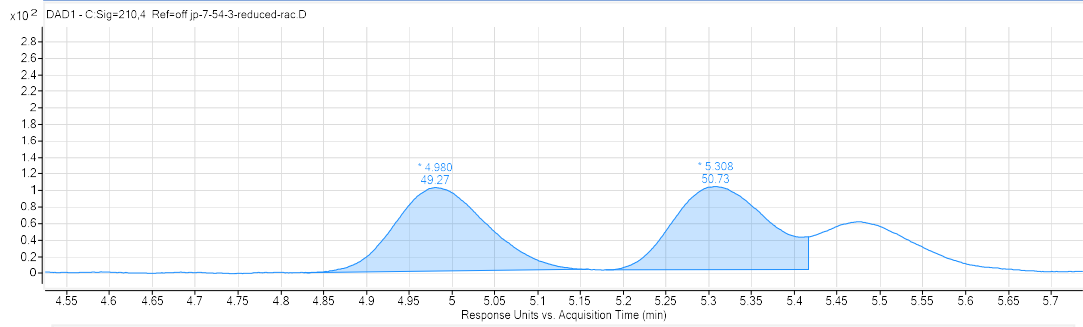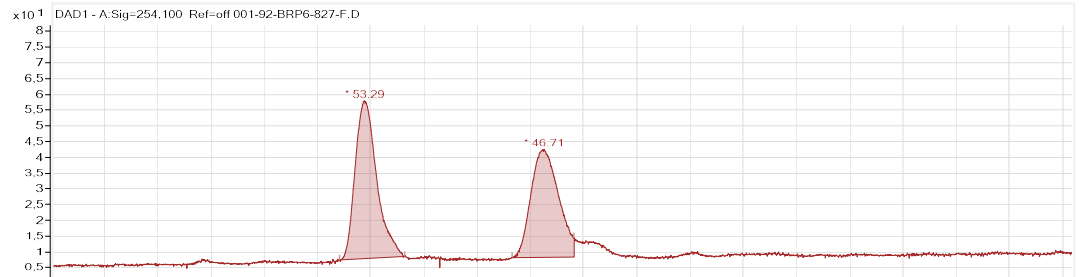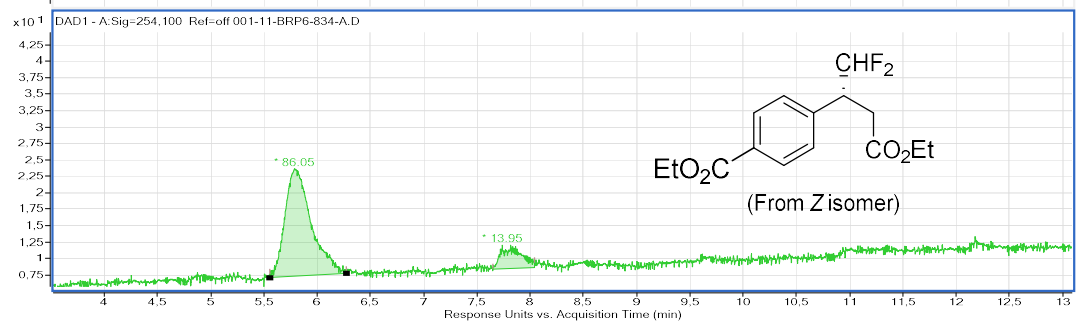

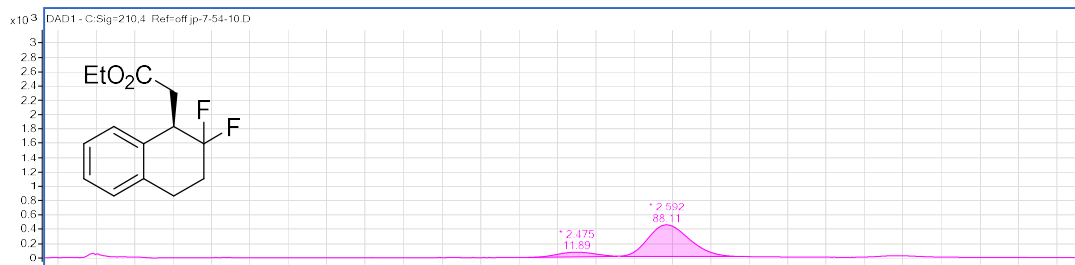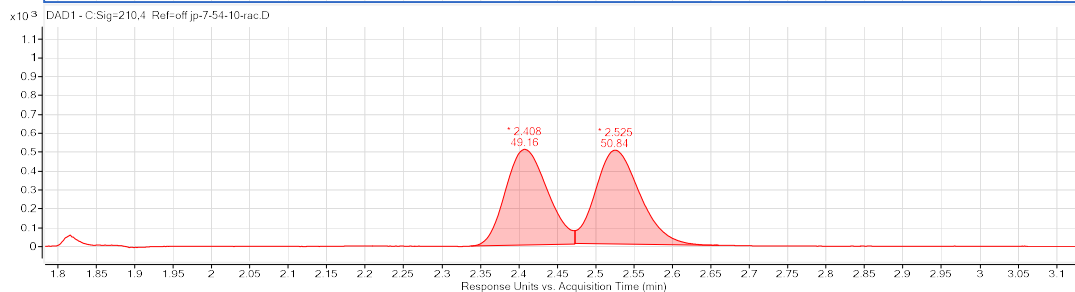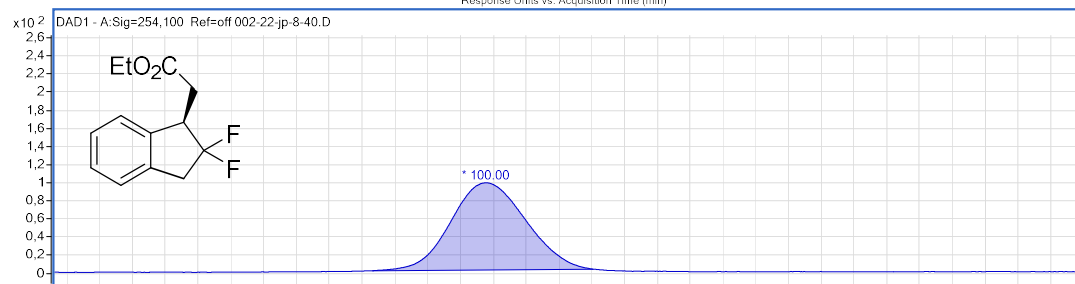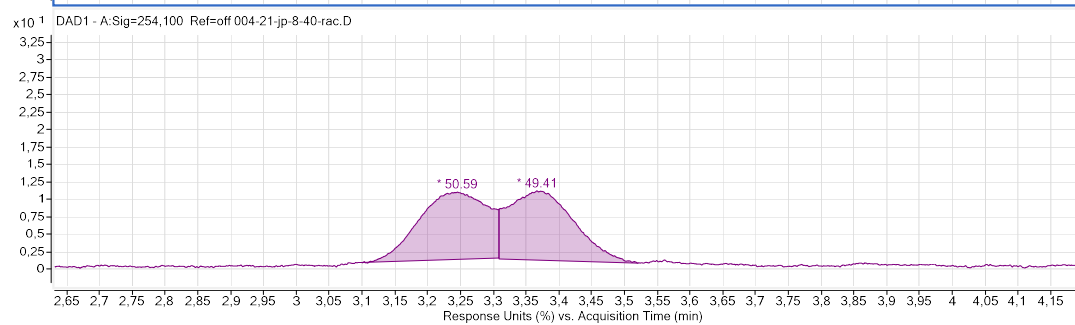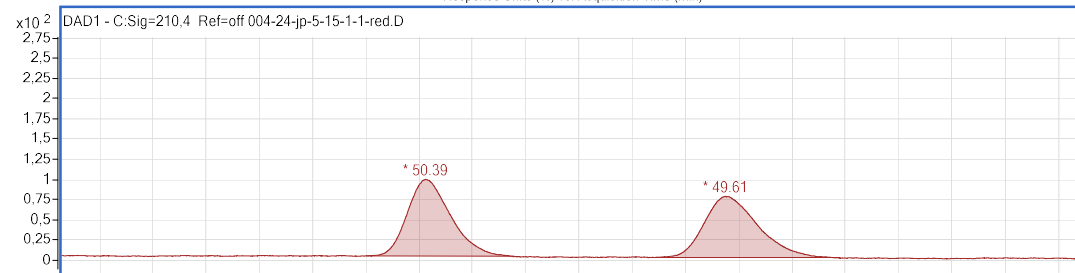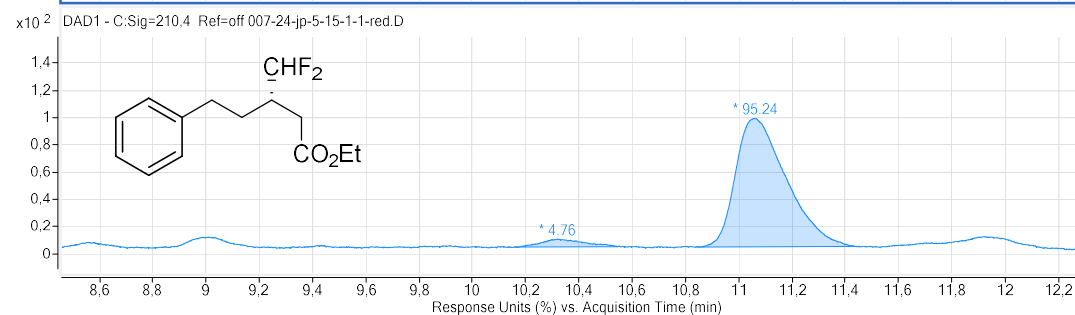



## Chromatogram Plots

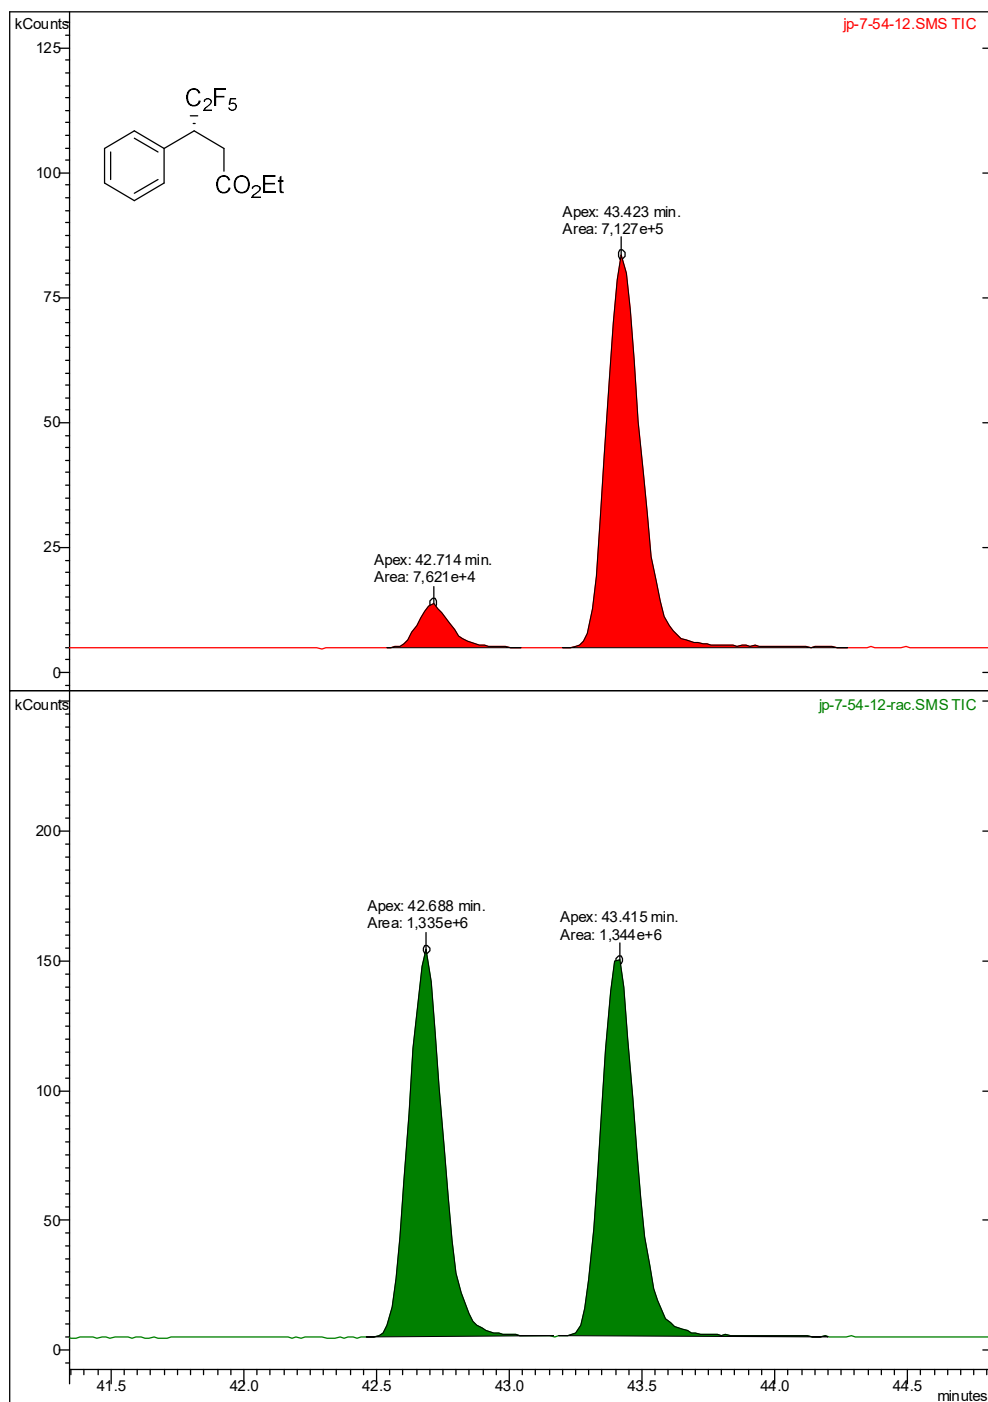

## Chromatogram Plots

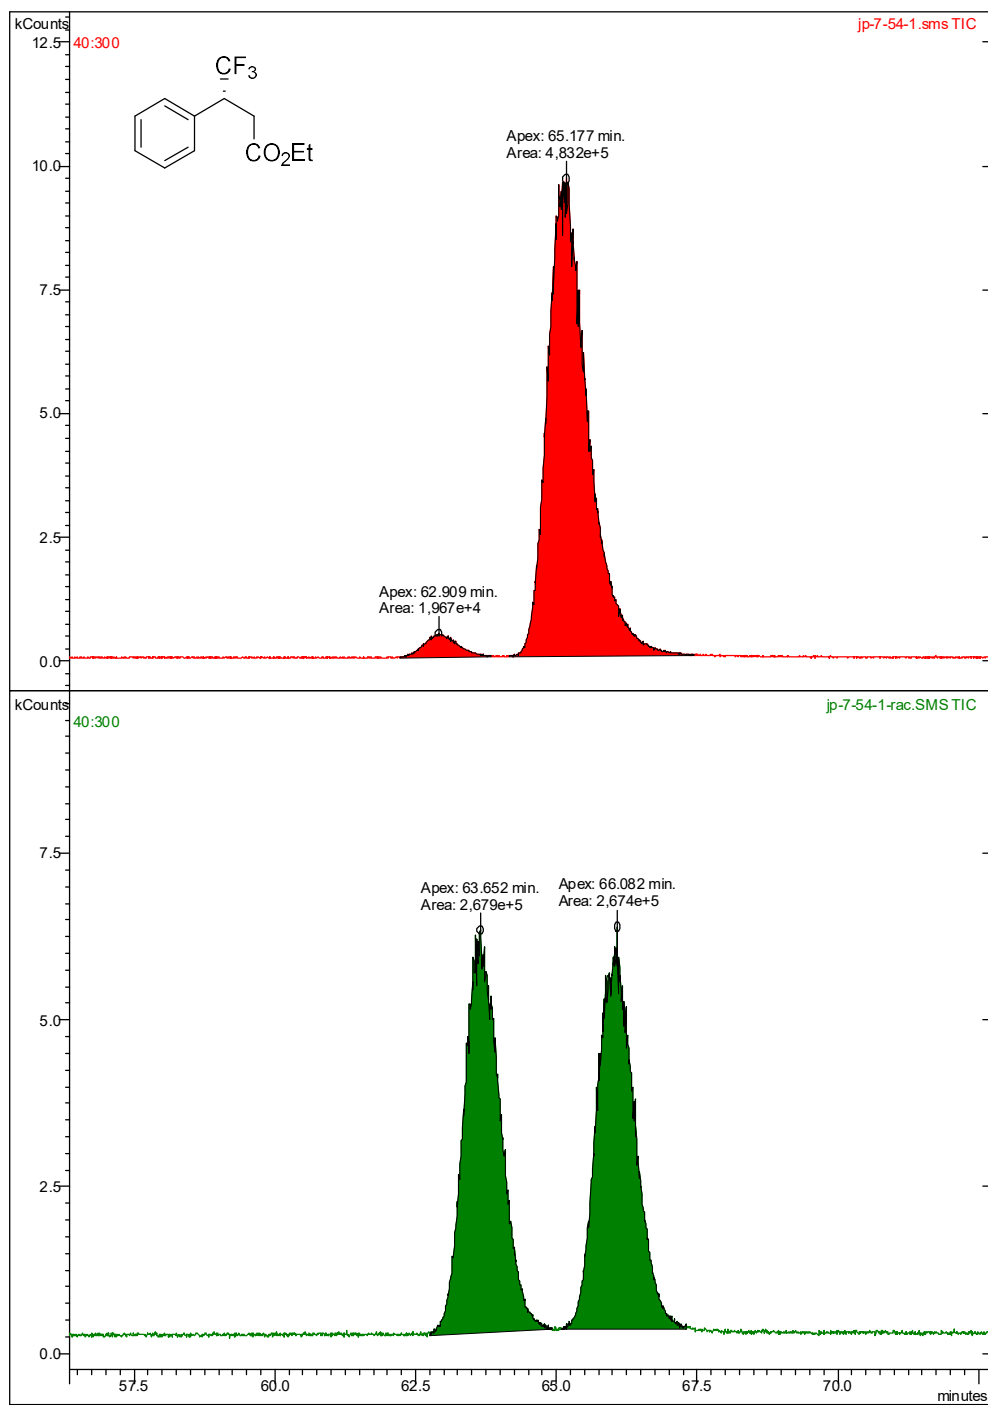

# Chromatogram Plots

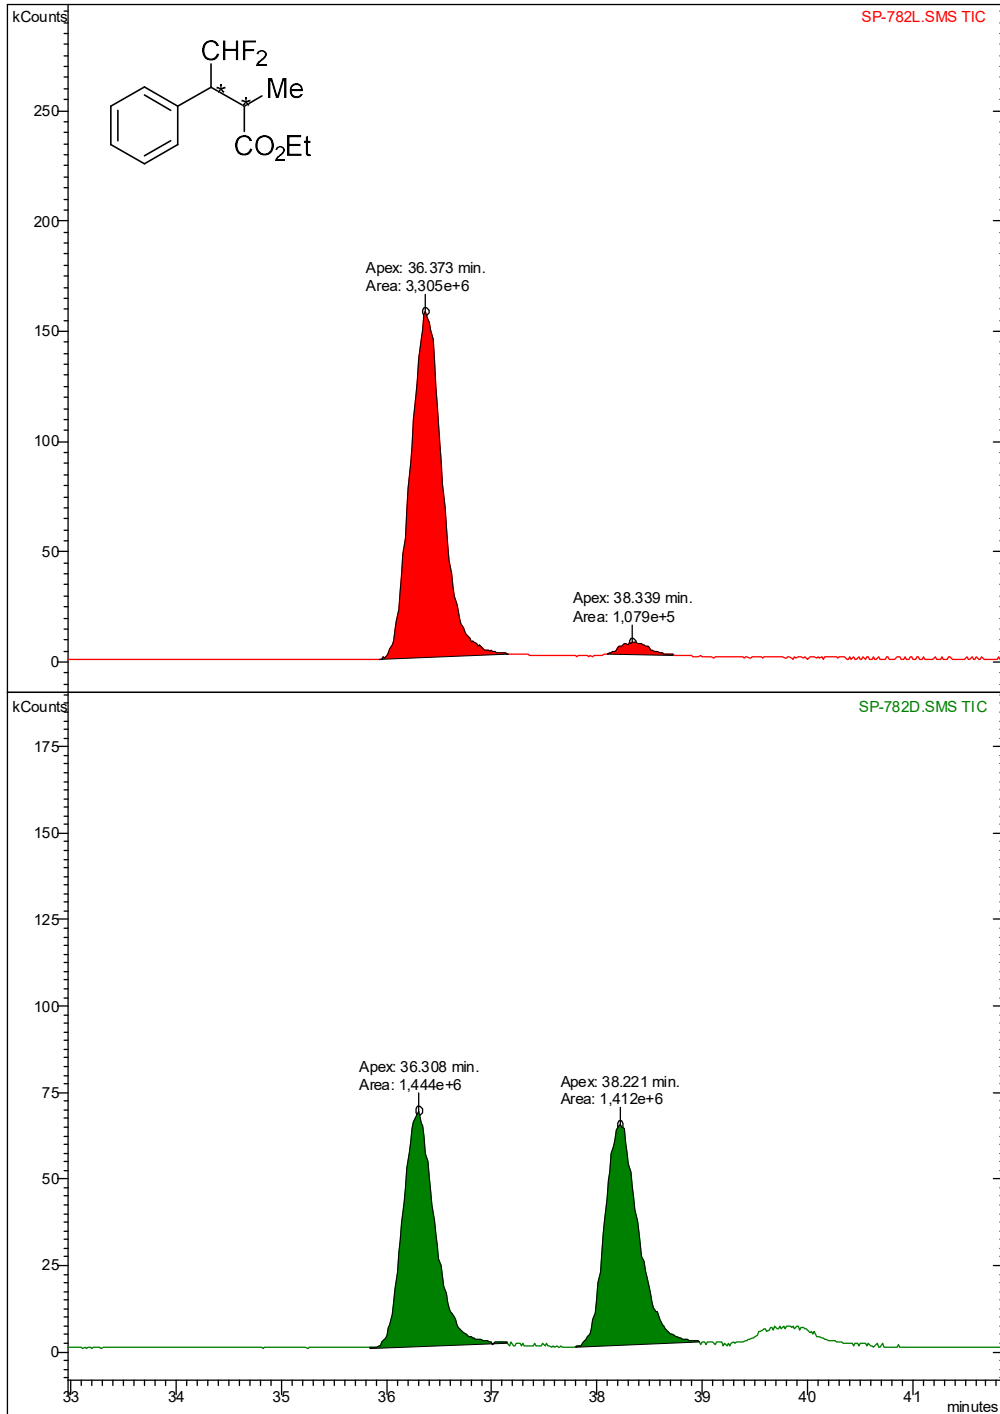

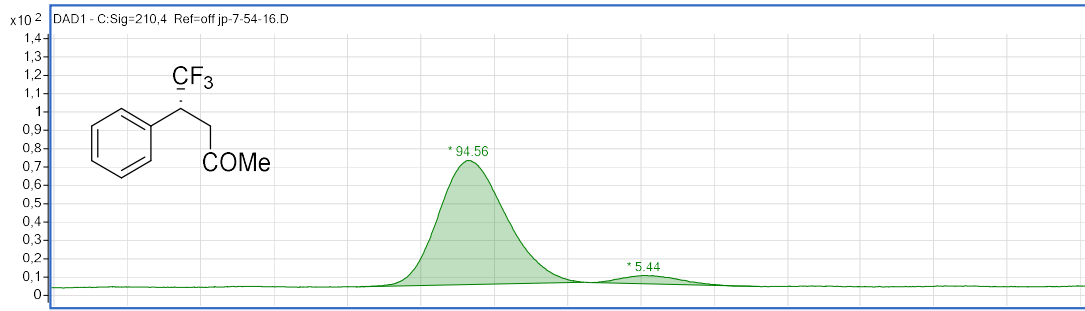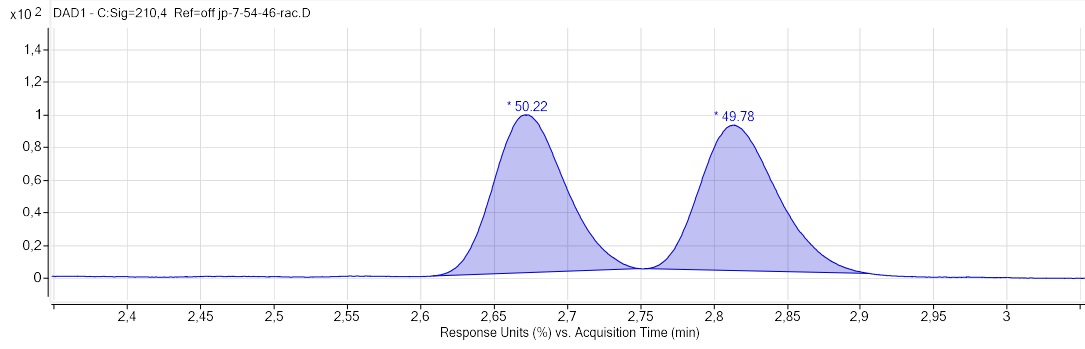

# Chromatogram Plots

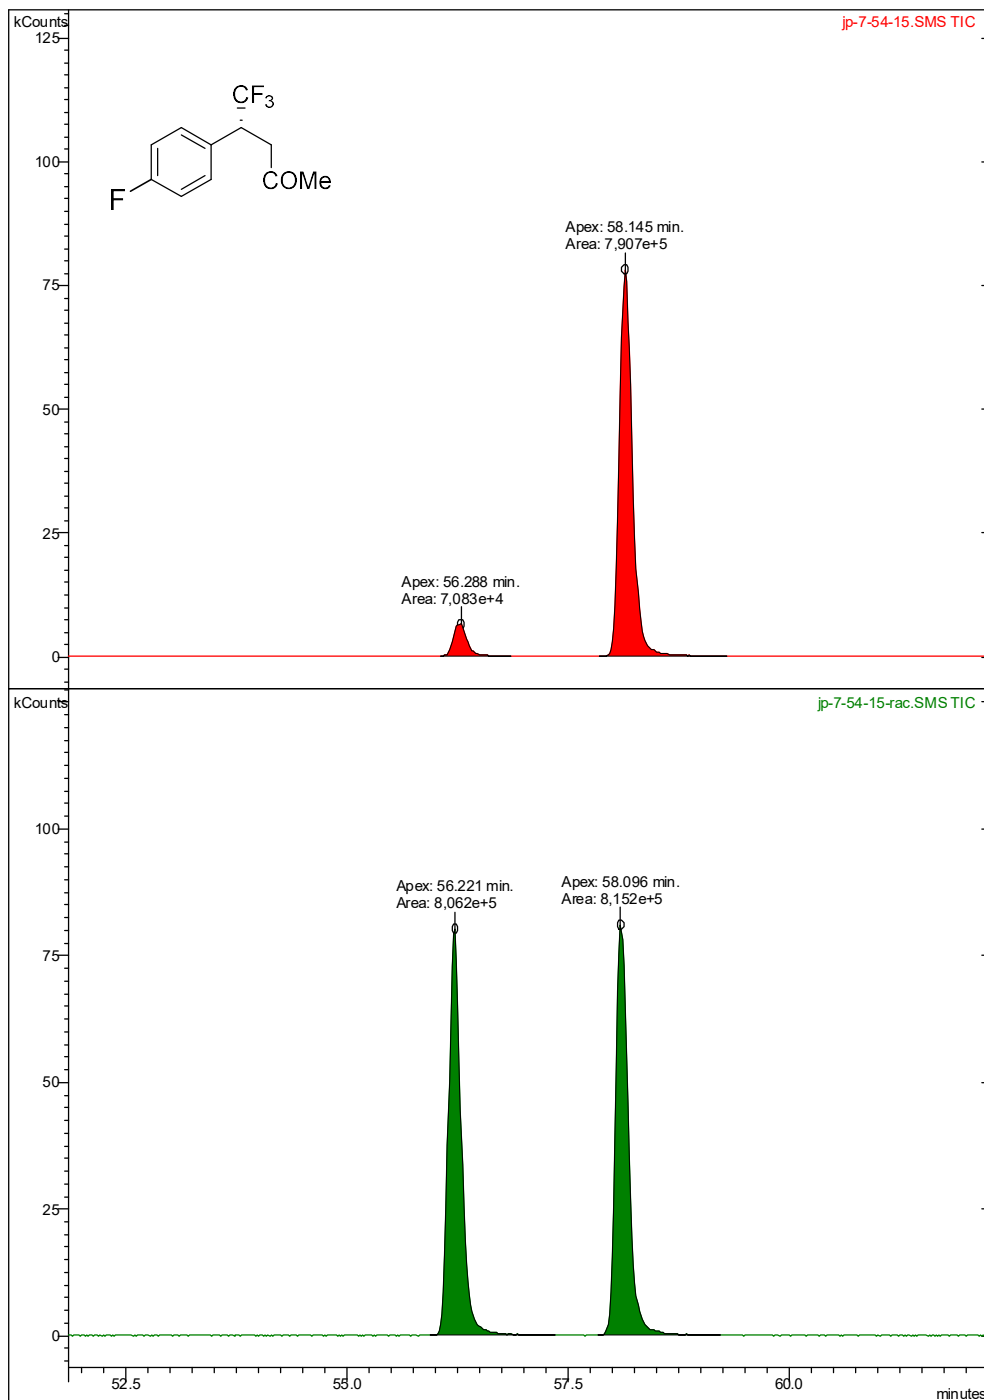

### Chromatogram Plots

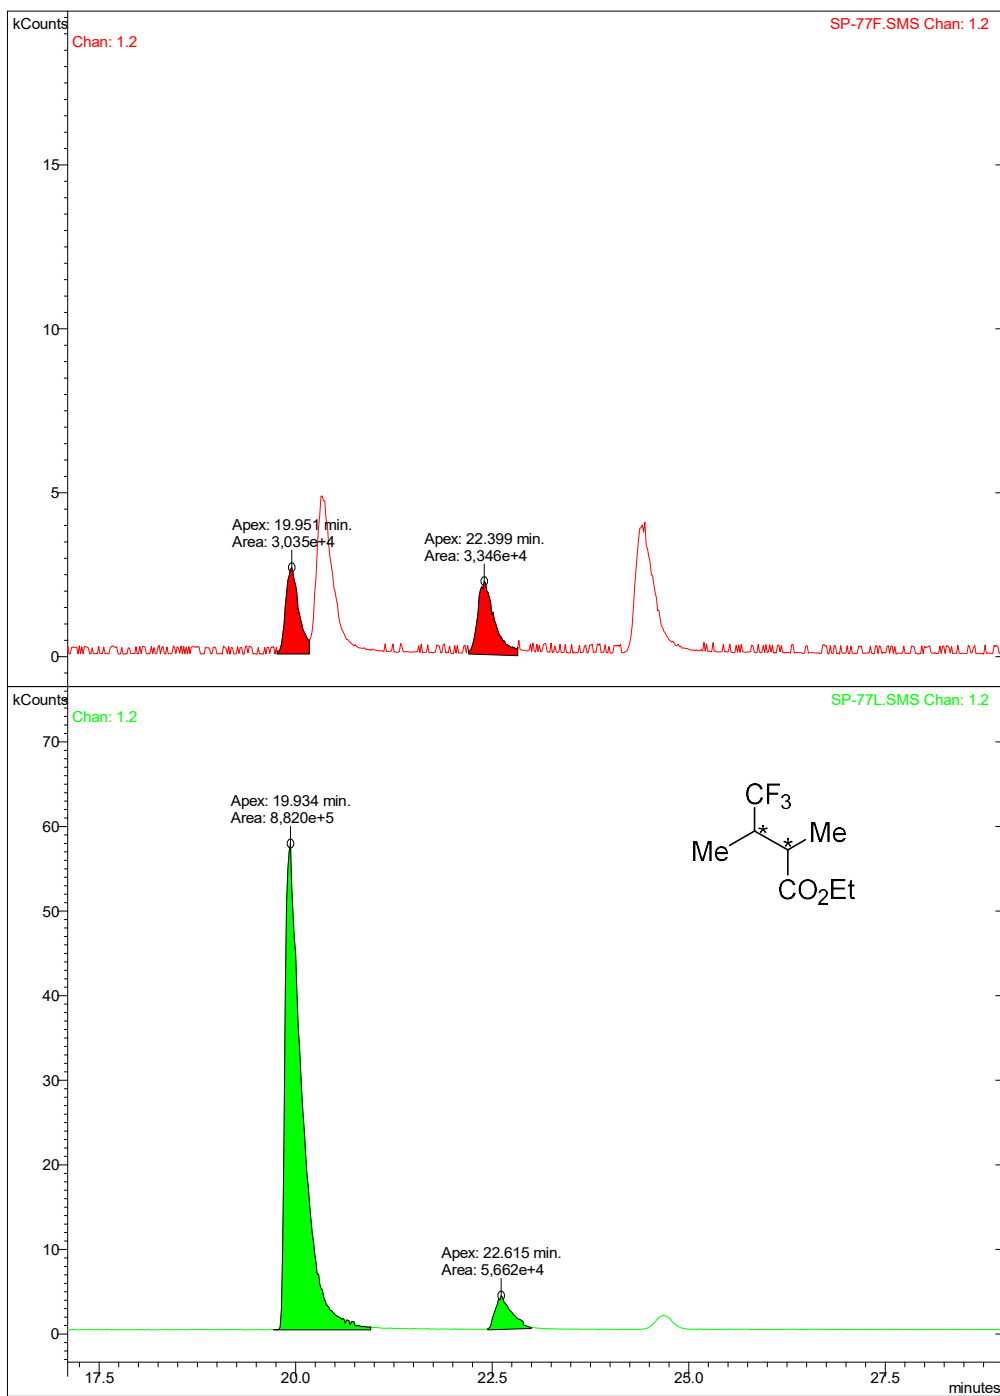

### Chromatogram Plots

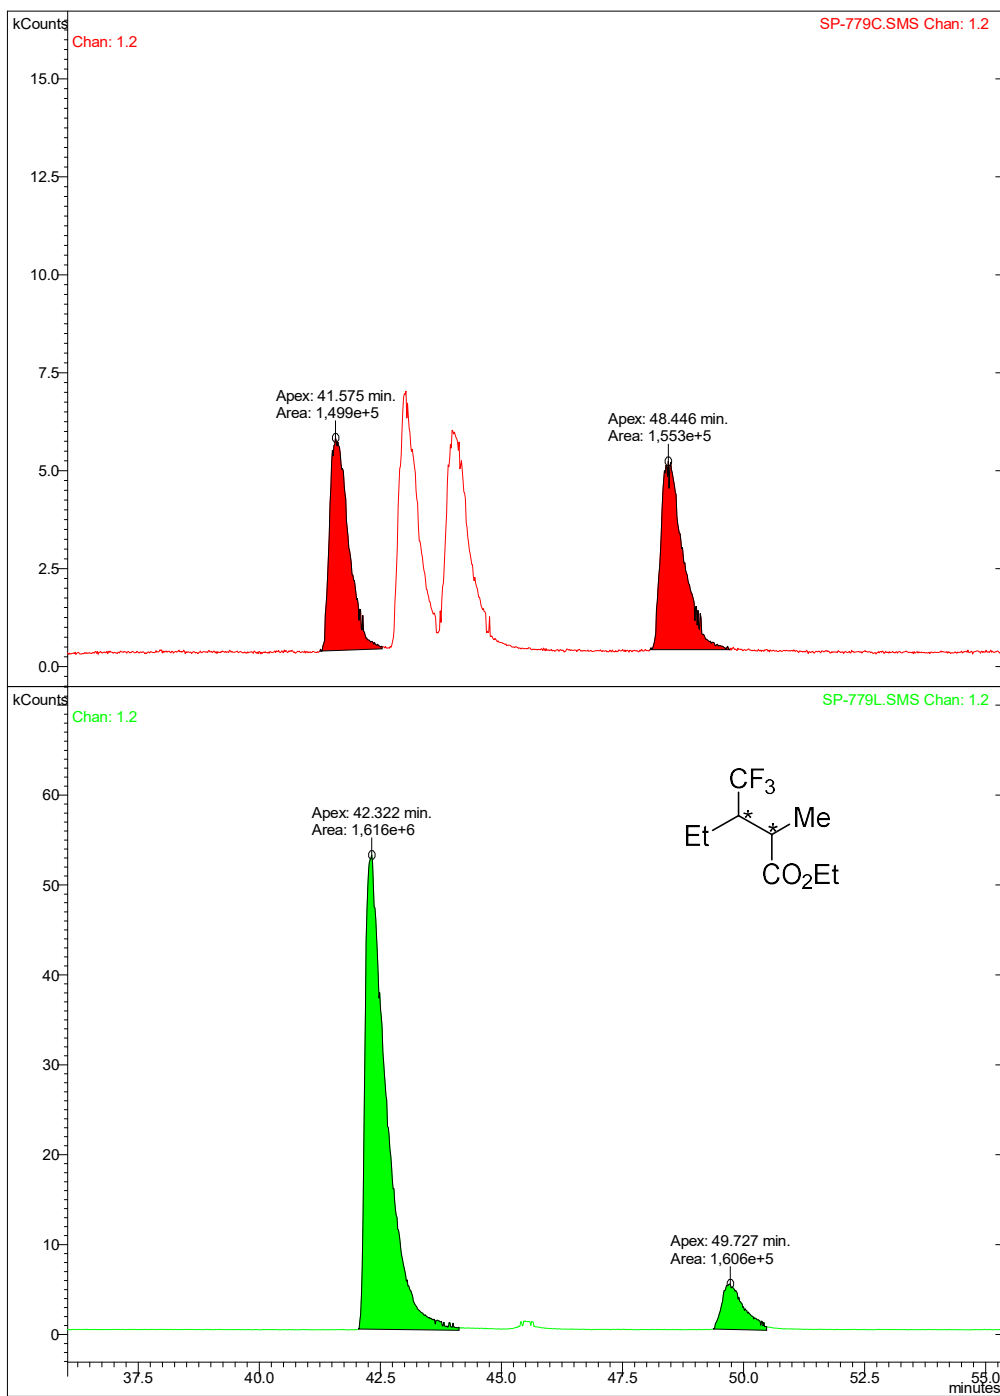

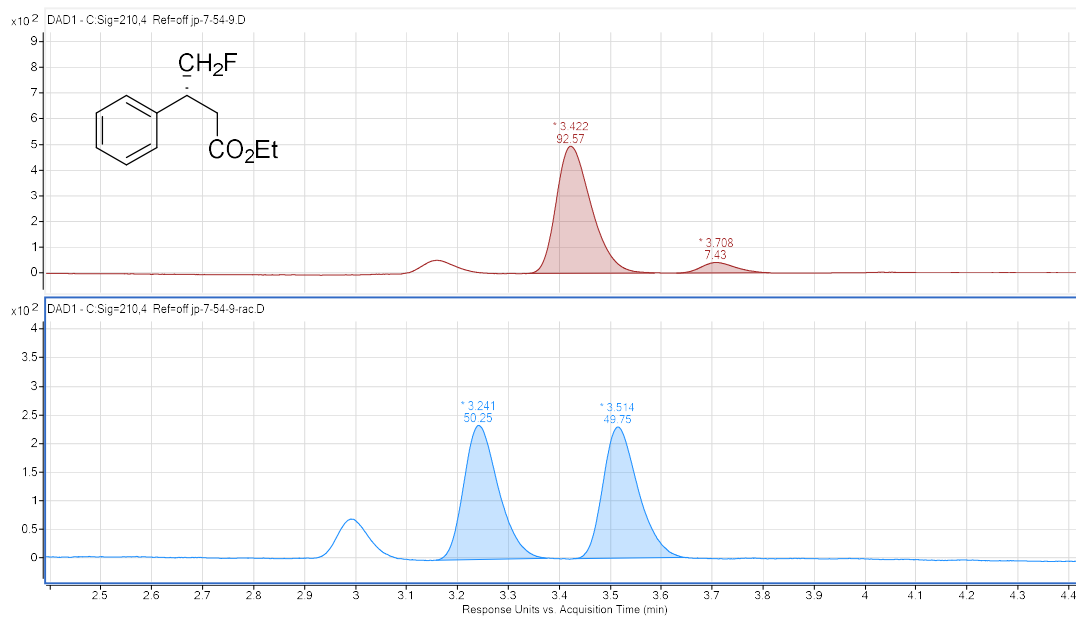



# Chromatogram Plots

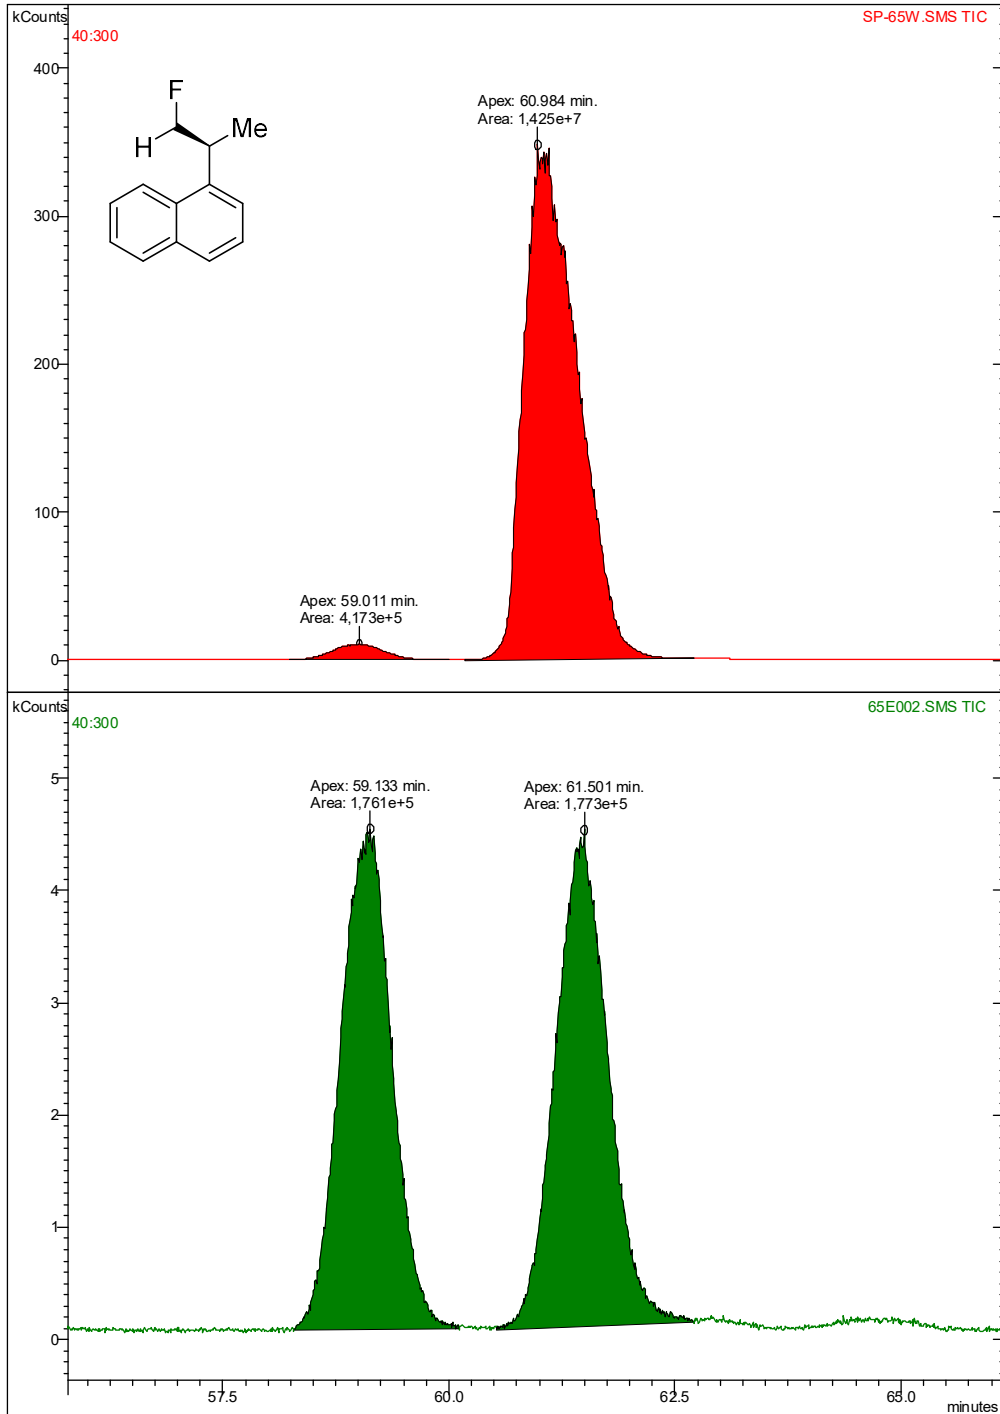

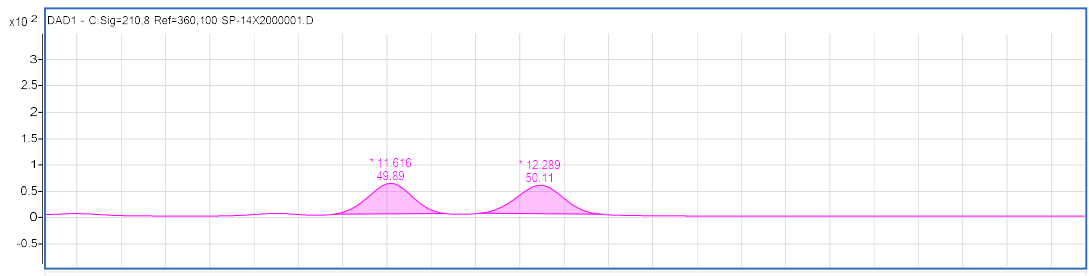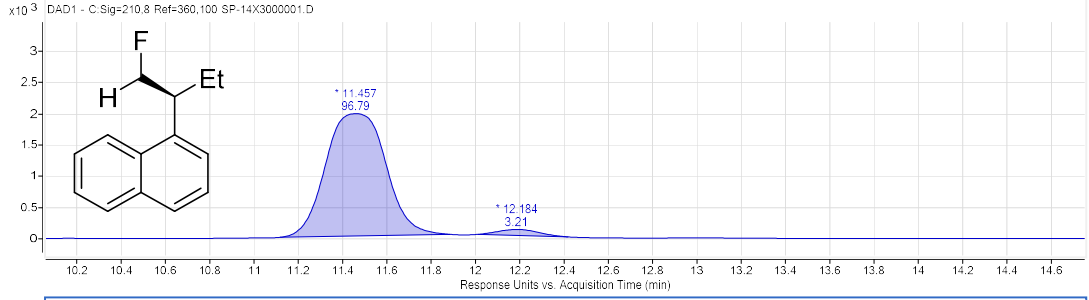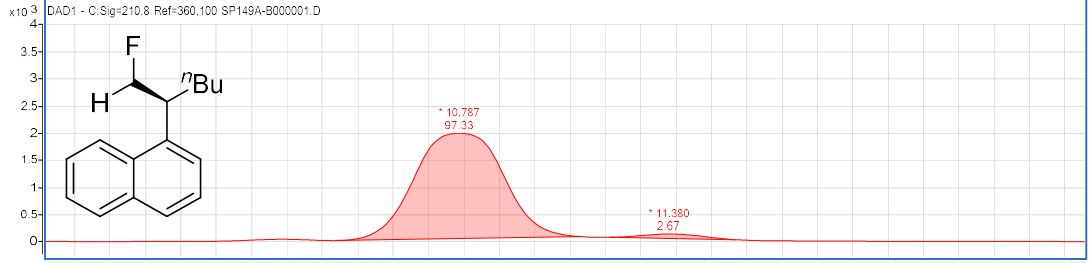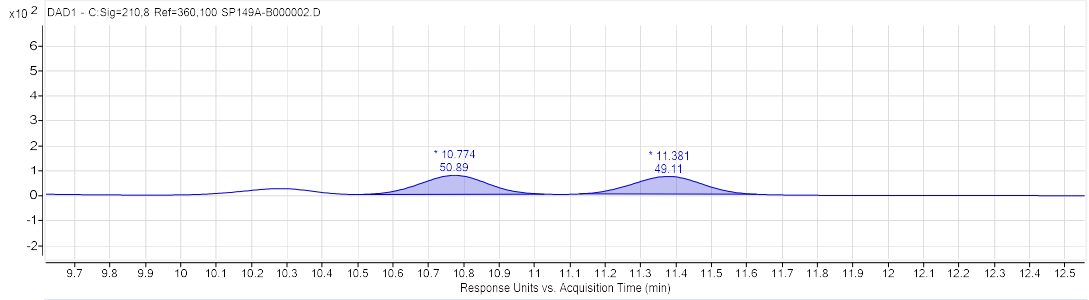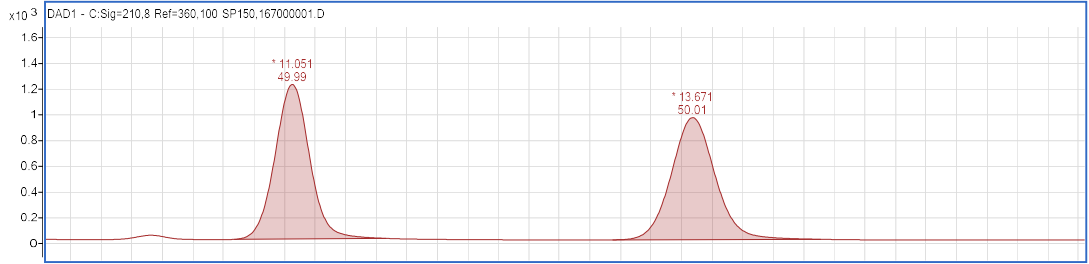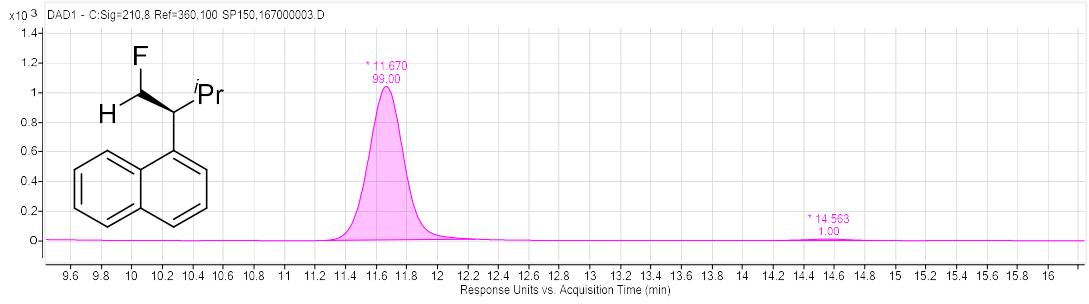

# Chromatogram Plots

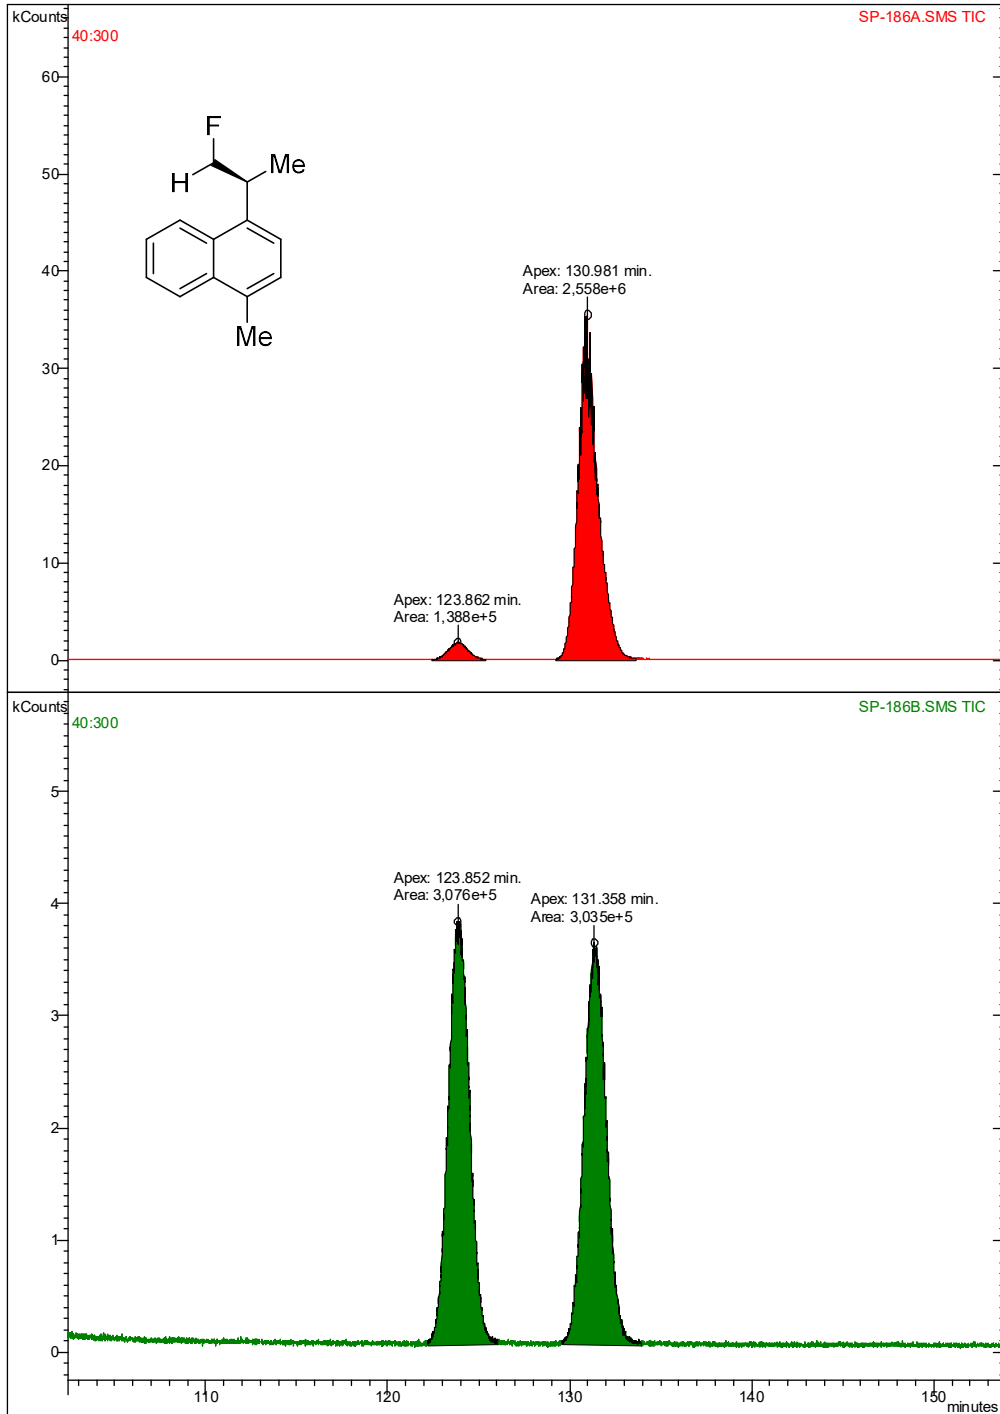

# Chromatogram Plots

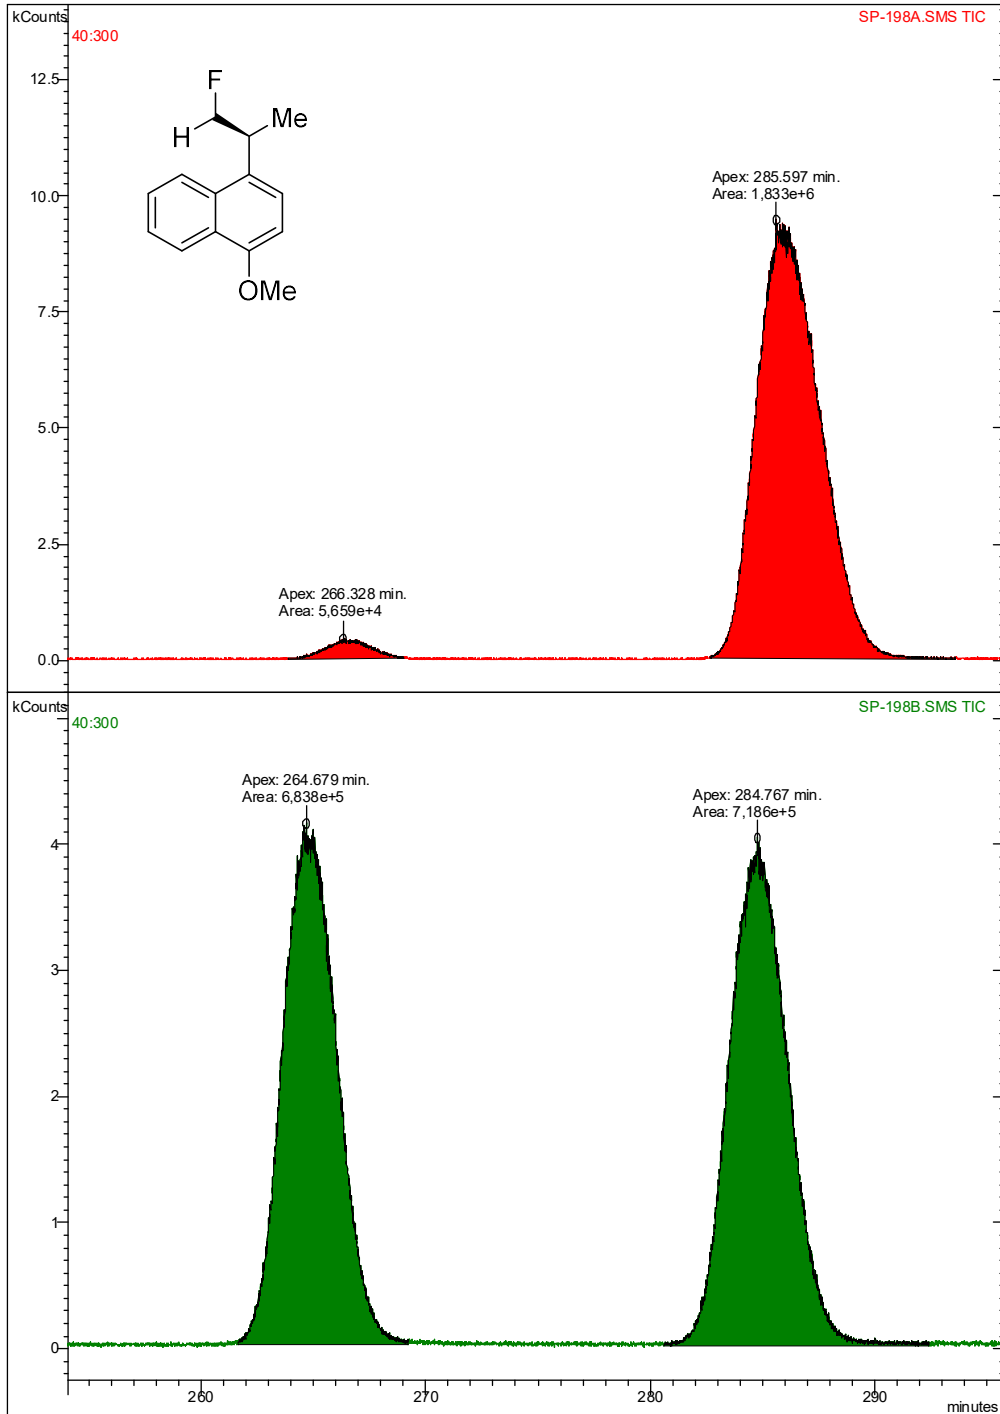

# Chromatogram Plots

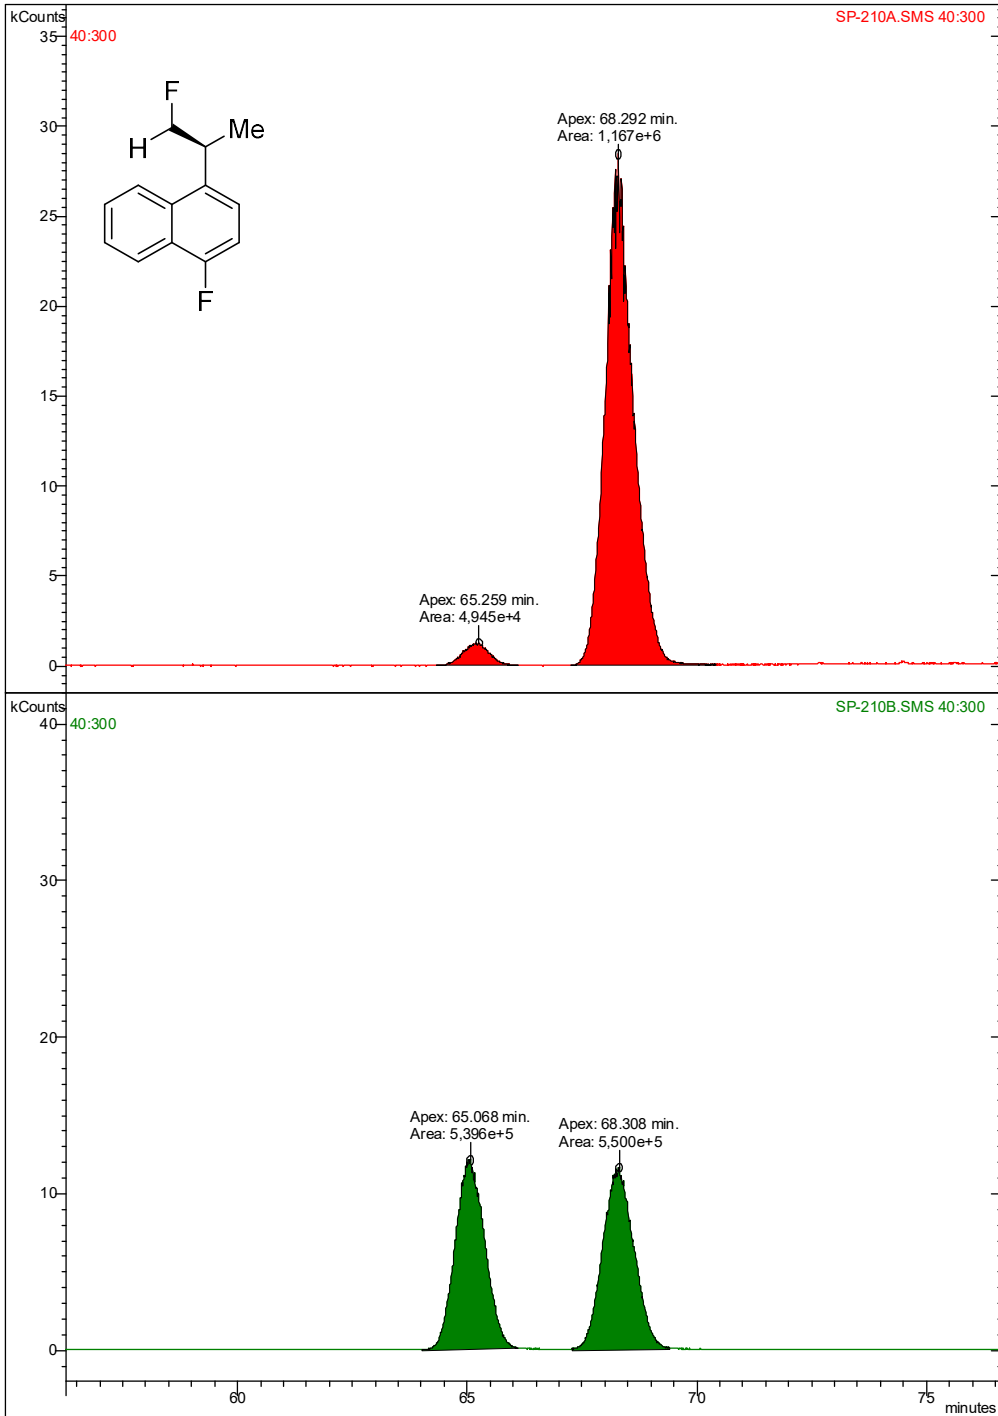

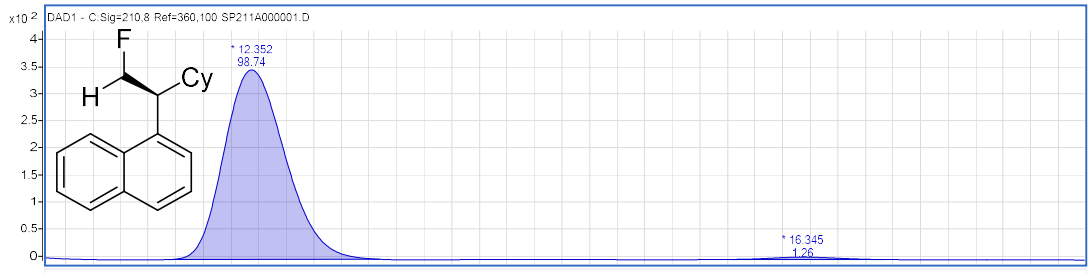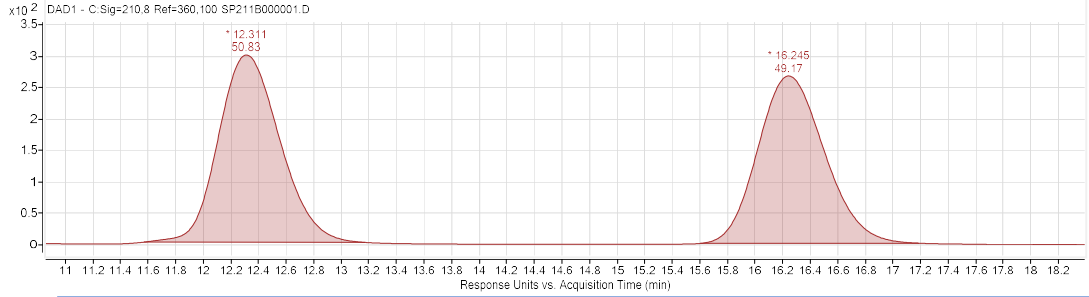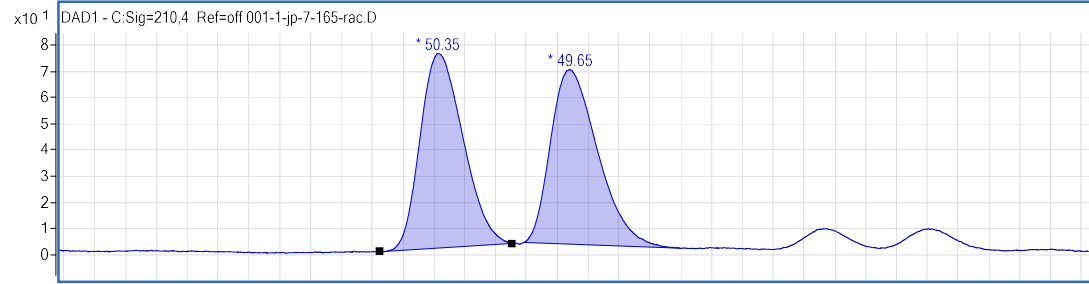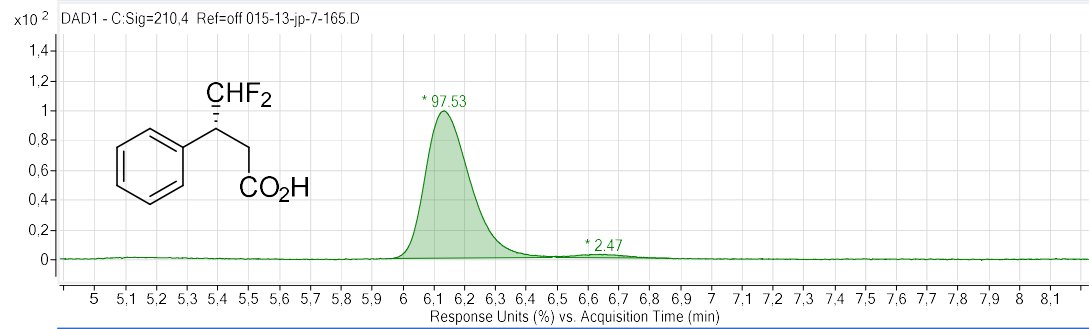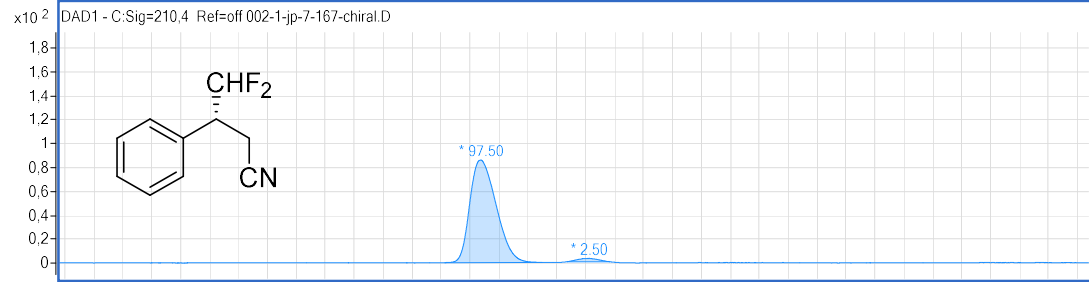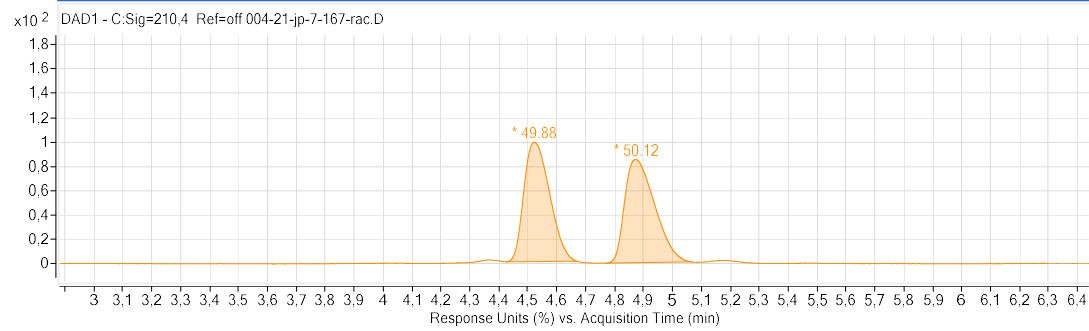

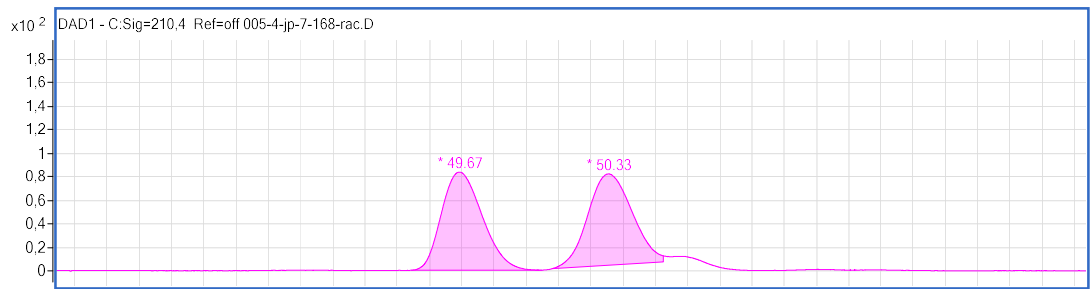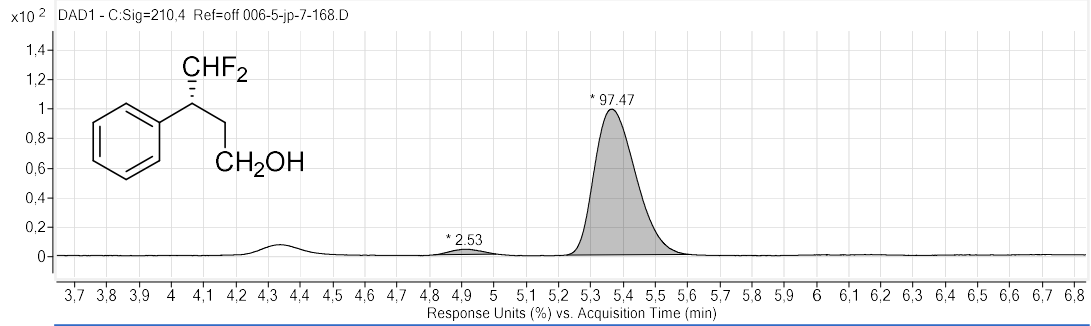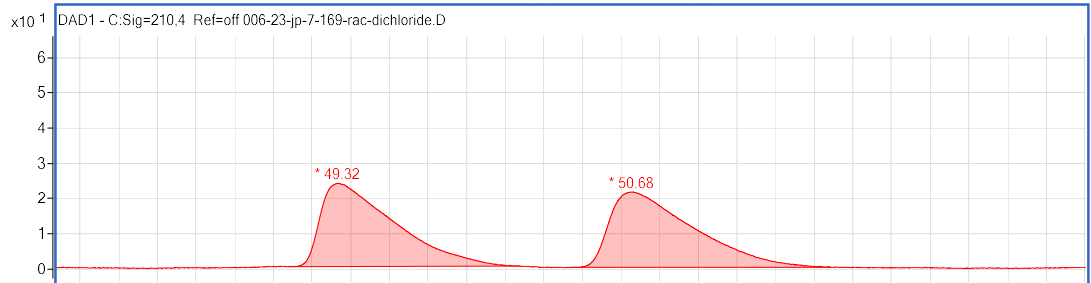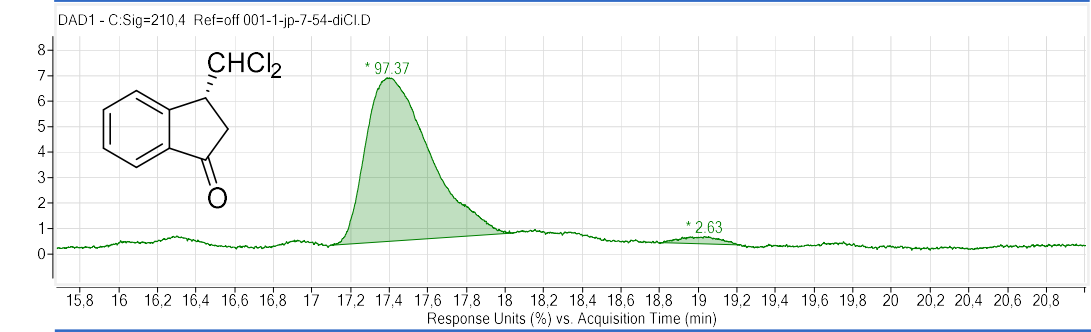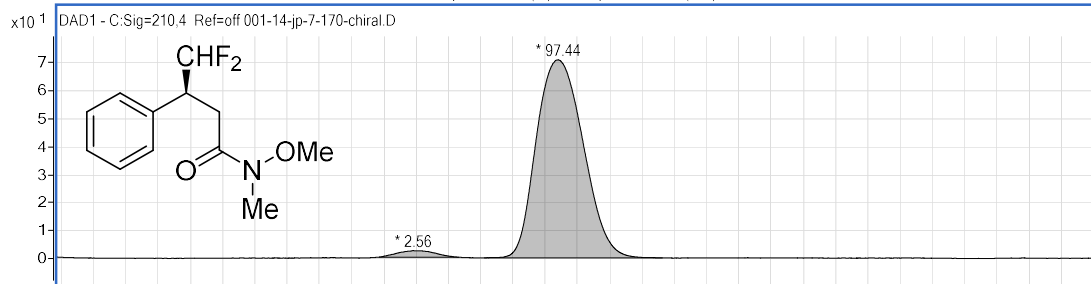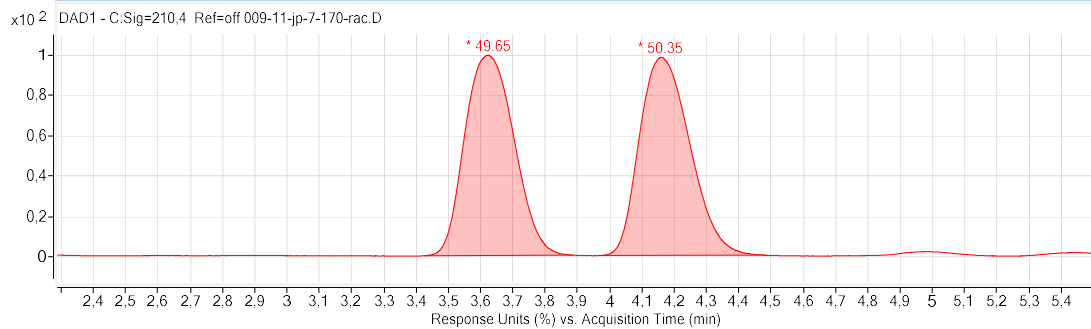

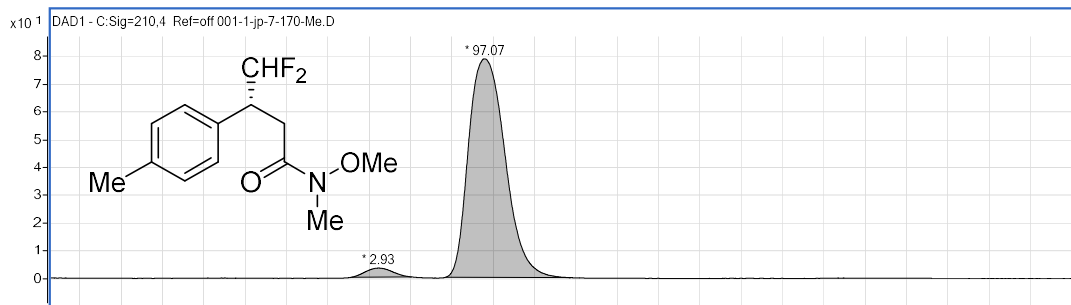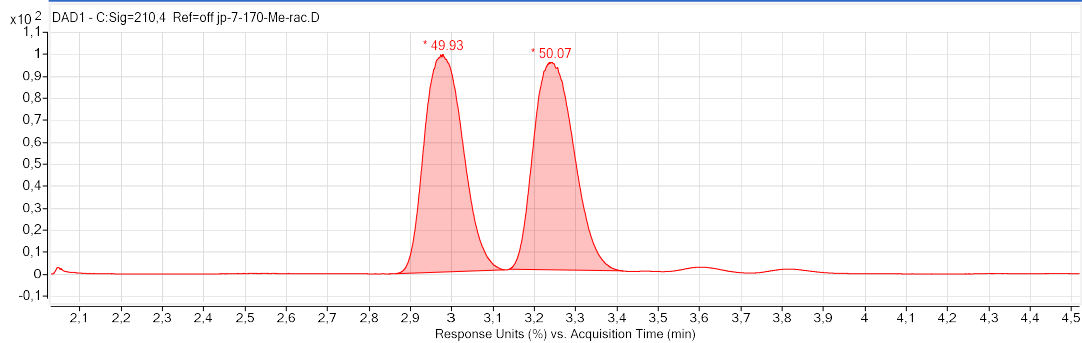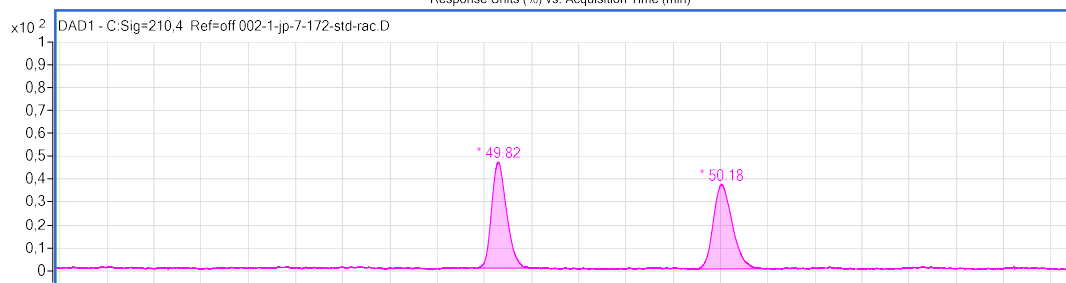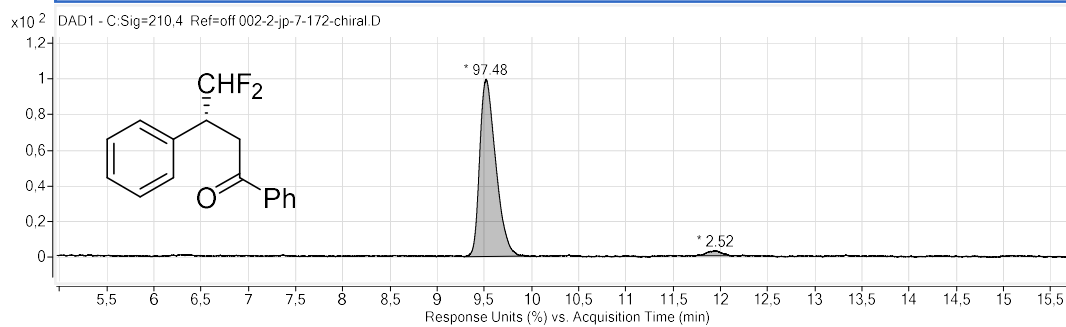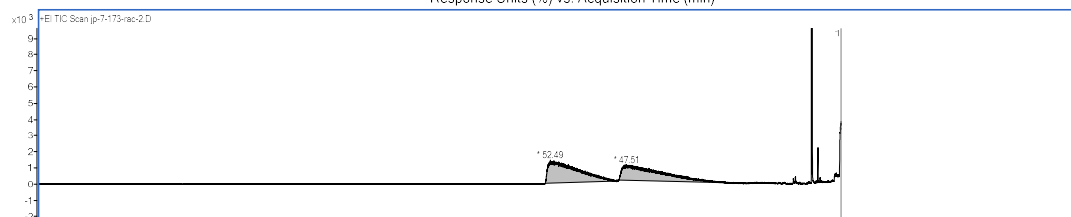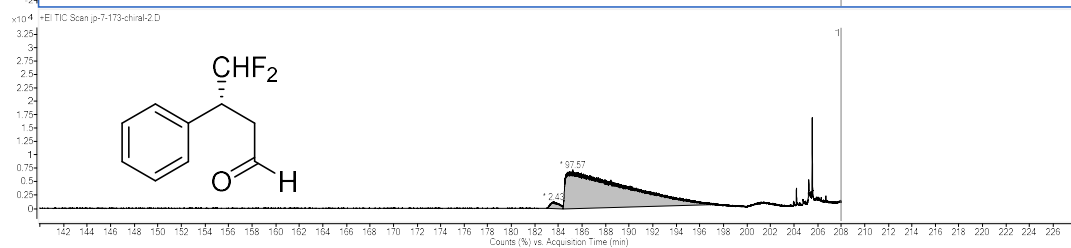



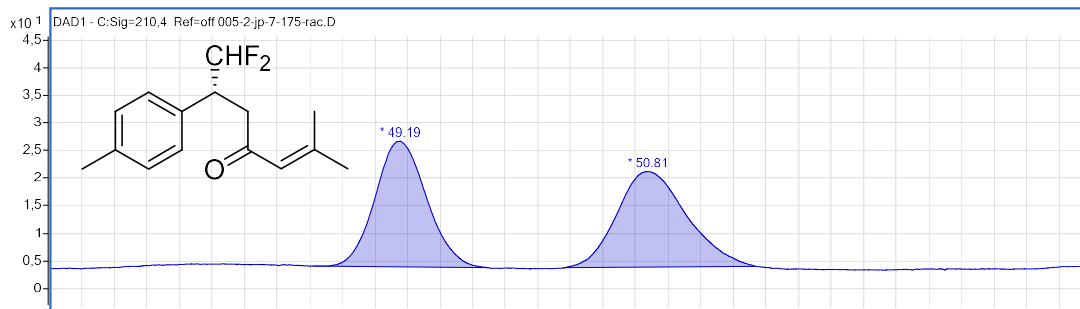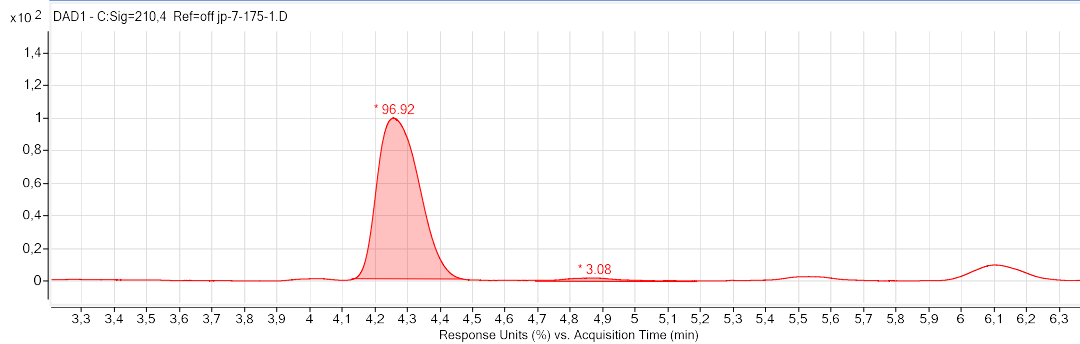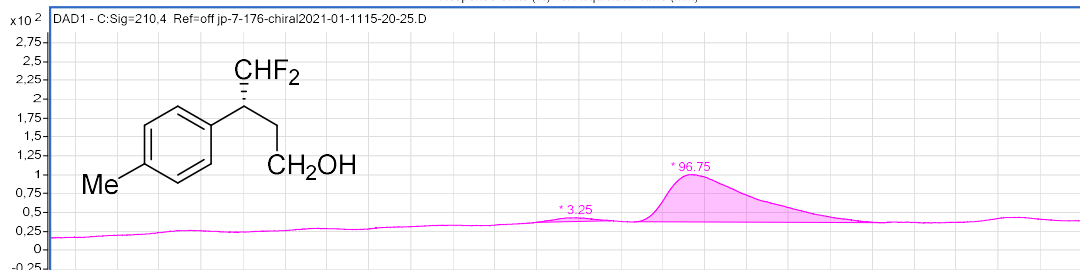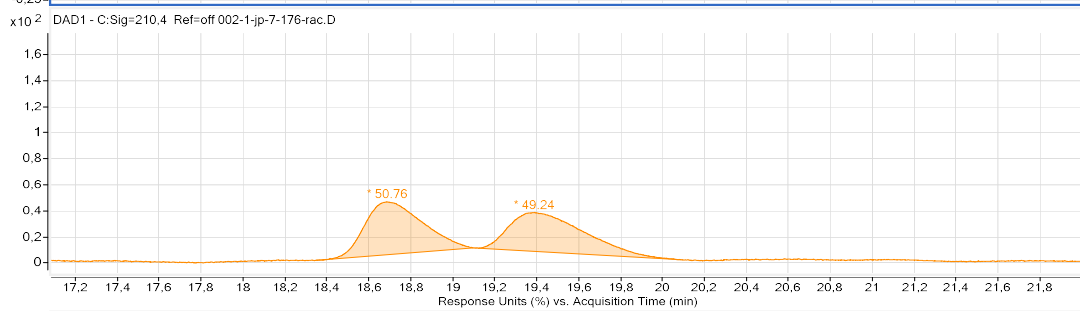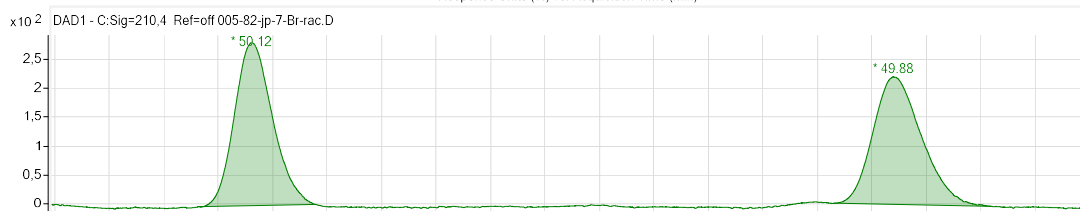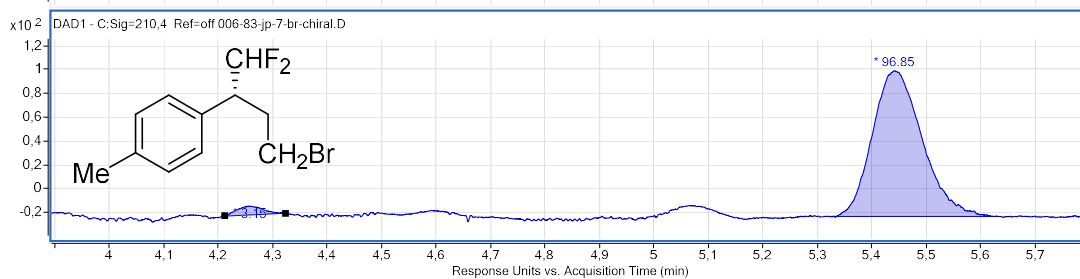

## 11. References

1. (a) M. Bos, W. S. Huang, T. Poisson, X. Pannecoucke, A. B. Charette and P. Jubault, *Angew. Chem.*, 2017, **129**, 13504-13508; (b) G. S. Prakash, J. Hu and G. A. Olah, *J. Fluor. Chem.*, 2001, **112**, 355-360; (c) D. J. Leng, C. M. Black and G. Pattison, *Org. Biomol. Chem.*, 2016, **14**, 1531-1535.
2. D. Grassi, H. Li and A. Alexakis, *Chem. Commun.*, 2012, **48**, 11404-11406.
3. Q. Liu, X. Shen, C. Ni and J. Hu, *Angew. Chem., Int. Ed.*, 2017, **56**, 619-623.
4. P. Poutrel, M. V. Ivanova, X. Pannecoucke, P. Jubault and T. Poisson, *Chem. Eur. J.*, 2019, **25**, 15262-15266.
